# Supplementary material for: Transcriptomic Analysis of Porcine Endometrium during Implantation after In Vitro Stimulation by Adiponectin
Source: MDPI journal article supplement (doi:10.3390/ijms20061335), 2019-03-16
Supplement: s1 [file s1]

**Supplementary Table 3**  
The most significantly enriched gene ontologies (biological process)

| GO - Biological Process |                                                      |                                                           |       |          |                                                                                                                                                                                                                                                                                                                              |
|-------------------------|------------------------------------------------------|-----------------------------------------------------------|-------|----------|------------------------------------------------------------------------------------------------------------------------------------------------------------------------------------------------------------------------------------------------------------------------------------------------------------------------------|
| Up-regulated            |                                                      |                                                           | Count | p-value  | Altered genes                                                                                                                                                                                                                                                                                                                |
| GO:0006396              | RNA processing                                       |                                                           | 12    | 1,72E-02 | SF3B1, PAPOLA, PPIG, TRMT11, TRDMT1, MPHOSPH10, SYNCRIP, WDR3, NOP58, NOP56, ALG11, KIAA1429                                                                                                                                                                                                                                 |
|                         | *GO:0034470                                          | ncRNA processing                                          | 7     | 9,69E-03 | TRMT11, TRDMT1, MPHOSPH10, WDR3, NOP58, NOP56, ALG11                                                                                                                                                                                                                                                                         |
|                         | *GO:0006364                                          | rRNA processing                                           | 5     | 1,22E-02 | MPHOSPH10, WDR3, NOP58, NOP56, ALG11                                                                                                                                                                                                                                                                                         |
| GO:0022403              | Cell cycle phase                                     |                                                           | 11    | 6,96E-03 | TAF2, CCDC99, DCLRE1A, CUL5, PRC1, DBF4, ALG11, FANCA, SMC2, ATM, HELLS                                                                                                                                                                                                                                                      |
|                         | *GO:0000279                                          | M phase                                                   | 8     | 4,09E-02 | CCDC99, DCLRE1A, PRC1, ALG11, FANCA, SMC2, ATM, HELLS                                                                                                                                                                                                                                                                        |
| GO:0022402              | Cell cycle process                                   |                                                           | 11    | 4,77E-02 | TAF2, CCDC99, DCLRE1A, CUL5, PRC1, DBF4, ALG11, FANCA, SMC2, ATM, HELLS                                                                                                                                                                                                                                                      |
| GO:0003006              | Developmental process involved in reproduction       |                                                           | 9     | 3,97E-03 | HOOK1, PLA2G4A, FGF7, TDRD7, DLD, RQCD1, RPS6KB1, FANCA, BMPR1A                                                                                                                                                                                                                                                              |
| GO:0019953              | Sexual reproduction                                  |                                                           | 9     | 7,68E-02 | HOOK1, PLA2G4A, TDRD7, DLD, MYCBP, RPS6KB1, SEPP1, ALG11, ATM                                                                                                                                                                                                                                                                |
| GO:0034660              | ncRNA metabolic process                              |                                                           | 8     | 7,05E-03 | TRMT11, TRDMT1, MPHOSPH10, WDR3, NOP58, NOP56, ALG11, VARS                                                                                                                                                                                                                                                                   |
|                         | *GO:0016072                                          | rRNA metabolic process                                    | 5     | 1,41E-02 | MPHOSPH10, WDR3, NOP58, NOP56, ALG11                                                                                                                                                                                                                                                                                         |
| *GO:0007276             | Gamete generation                                    |                                                           | 8     | 8,92E-02 | HOOK1, PLA2G4A, TDRD7, DLD, MYCBP, RPS6KB1, ALG11, ATM                                                                                                                                                                                                                                                                       |
|                         | *GO:0007281                                          | Germ cell development                                     | 4     | 7,47E-02 | HOOK1, TDRD7, DLD, RPS6KB1                                                                                                                                                                                                                                                                                                   |
| GO:0000278              | Mitotic cell cycle                                   |                                                           | 8     | 6,82E-02 | TAF2, CCDC99, DCLRE1A, CUL5, PRC1, DBF4, SMC2, HELLS                                                                                                                                                                                                                                                                         |
| GO:0022613              | Ribonucleoprotein complex biogenesis                 |                                                           | 6     | 3,07E-02 | MPHOSPH10, WDR3, NOP58, NOP56, ALG11, BMS1                                                                                                                                                                                                                                                                                   |
|                         | *GO:0042254                                          | Ribosome biogenesis                                       | 6     | 6,63E-03 | MPHOSPH10, WDR3, NOP58, NOP56, ALG11, BMS1                                                                                                                                                                                                                                                                                   |
| GO:0006457              | Protein folding                                      |                                                           | 6     | 2,88E-02 | PPIG, FKBP3, CCT6A, HSPD1, UGGT1, CLPX                                                                                                                                                                                                                                                                                       |
| GO:0014070              | Response to organic cyclic substance                 |                                                           | 5     | 3,00E-02 | TAF2, RYR1, ACACA, RPS6KB1, PPP2R2A                                                                                                                                                                                                                                                                                          |
| GO:0009141              | Nucleoside triphosphate metabolic process            |                                                           | 5     | 3,84E-02 | ENPP1, ATP9A, OLA1, ATP5O, ATP8                                                                                                                                                                                                                                                                                              |
|                         | *GO:0009143                                          | Nucleoside triphosphate catabolic process                 | 3     | 2,23E-02 | ENPP1, OLA1, ATP5O                                                                                                                                                                                                                                                                                                           |
| GO:0007548              | Sex differentiation                                  |                                                           | 5     | 5,90E-02 | PLA2G4A, FGF7, RQCD1, FANCA, BMPR1A                                                                                                                                                                                                                                                                                          |
| GO:0006352              | Transcription initiation                             |                                                           | 4     | 4,66E-02 | TAF2, SNAPC5, TAF5, MED23                                                                                                                                                                                                                                                                                                    |
| GO:0008654              | Phospholipid biosynthetic process                    |                                                           | 4     | 7,65E-02 | SAMD8, PLA2G4A, FGF7, MBOAT1                                                                                                                                                                                                                                                                                                 |
| GO:0009166              | Nucleotide catabolic                                 |                                                           | 3     | 8,73E-02 | ENPP1, OLA1, ATP5O                                                                                                                                                                                                                                                                                                           |
|                         | *GO:0046034                                          | ATP metabolic process                                     | 4     | 8,18E-02 | ATP9A, OLA1, ATP5O, ATP8                                                                                                                                                                                                                                                                                                     |
| GO:0070167              | Regulation of biomineral formation                   |                                                           | 3     | 3,82E-02 | PLA2G4A, ENPP1, BMPR1A                                                                                                                                                                                                                                                                                                       |
|                         | GO:0030500                                           | Regulation of bone mineralization                         | 3     | 3,39E-02 | PLA2G4A, ENPP1, BMPR1A                                                                                                                                                                                                                                                                                                       |
| GO:0050679              | Positive regulation of epithelial cell proliferation |                                                           | 3     | 5,97E-02 | FGF7, TGFA, BMPR1A                                                                                                                                                                                                                                                                                                           |
| GO:0015780              | Nucleotide-sugar transport                           |                                                           | 2     | 5,67E-02 | SLC35A5, SLC35A3                                                                                                                                                                                                                                                                                                             |
| GO:0045022              | Early endosome to late endosome transport            |                                                           | 2     | 9,28E-02 | HOOK1, EEA1                                                                                                                                                                                                                                                                                                                  |
| GO:0048875              | Chemical homeostasis within a tissue                 |                                                           | 2     | 9,28E-02 | PLA2G4A, FGF7                                                                                                                                                                                                                                                                                                                |
|                         | *GO:0043129                                          | Surfactant homeostasis                                    | 2     | 9,28E-02 | PLA2G4A, FGF7                                                                                                                                                                                                                                                                                                                |
| Down-regulated          |                                                      |                                                           | Count | p-value  | Altered genes                                                                                                                                                                                                                                                                                                                |
| GO:0006793              | Phosphorus metabolic process                         |                                                           | 45    | 1,43E-04 | SSH1, NUA2, STAT5A, CCNT1, SSH2, DDR2, UHMK1, CSNK2A2, APP, SNRK, CXCR4, MAP3K2, MDFIC, PTPLA, DCLK3, EEF2K, IL1B, DYRK3, ADRA2B, MTMR9, INSR, PDK1, PAN3, NCEH1, SMAD7, PI4KA, PKN2, PTPRU, CDKN3, CDC25C, PPP1CC, CDKL5, DAPK1, SACM1L, EPHA4, RPS6KA3, MTMR14, PRLR, HIPK1, HIPK3, CDC42BPA, JAK3, PIP4K2A, MAP3K13, MYLK |
| *GO:0006796             | Phosphate-containing compound metabolic process      |                                                           | 45    | 1,43E-04 | SSH1, NUA2, STAT5A, CCNT1, SSH2, DDR2, UHMK1, CSNK2A2, APP, SNRK, CXCR4, MAP3K2, MDFIC, PTPLA, DCLK3, EEF2K, IL1B, DYRK3, ADRA2B, MTMR9, INSR, PDK1, PAN3, NCEH1, SMAD7, PI4KA, PKN2, PTPRU, CDKN3, CDC25C, PPP1CC, CDKL5, DAPK1, SACM1L, EPHA4, RPS6KA3, MTMR14, PRLR, HIPK1, HIPK3, CDC42BPA, JAK3, PIP4K2A, MAP3K13, MYLK |
|                         | *GO:0016310                                          | Phosphorylation                                           | 34    | 4,33E-03 | NUAK2, STAT5A, CCNT1, DDR2, UHMK1, CSNK2A2, APP, SNRK, CXCR4, MAP3K2, MDFIC, EEF2K, DCLK3, IL1B, DYRK3, ADRA2B, INSR, PDK1, PAN3, SMAD7, PI4KA, PKN2, CDKL5, DAPK1, EPHA4, RPS6KA3, PRLR, HIPK1, HIPK3, CDC42BPA, JAK3, PIP4K2A, MAP3K13, MYLK                                                                               |
|                         | *GO:0006468                                          | Protein amino acid phosphorylation                        | 32    | 9,01E-04 | NUAK2, STAT5A, CCNT1, DDR2, UHMK1, CSNK2A2, APP, SNRK, CXCR4, MAP3K2, MDFIC, DCLK3, EEF2K, IL1B, DYRK3, ADRA2B, INSR, PDK1, PAN3, SMAD7, PKN2, CDKL5, DAPK1, EPHA4, RPS6KA3, PRLR, HIPK1, HIPK3, CDC42BPA, JAK3, MAP3K13, MYLK                                                                                               |
|                         | *GO:0001932                                          | Regulation of protein amino acid phosphorylation          | 11    | 1,33E-02 | PPP1R9B, APOA1, MDFIC, MAP3K2, SMAD7, HIPK3, SOCS1, IL1B, BDKRB1, IGF2, INSR                                                                                                                                                                                                                                                 |
|                         | *GO:0001933                                          | Negative regulation of protein amino acid phosphorylation | 4     | 4,70E-02 | SMAD7, SOCS1, BDKRB1, INSR                                                                                                                                                                                                                                                                                                   |
|                         | *GO:0051174                                          | Regulation of phosphorus metabolic process                | 29    | 4,92E-05 | CCNT1, BDKRB1, BCCIP, TNFRSF4, APLP2, APP, APOA1, CXCR4, MDFIC, MAP3K2, IL1B, ADRA2B, INSR, CNK, SMAD7, SOCS1, ELANE, IGF2, CDC25C, CDKN3, SIRT2, ATXN1, PPP1R9B, INHBA, CDKN1A, PPP1R2, PRLR, HIPK3, MAP3K13                                                                                                                |
|                         | *GO:0019220                                          | Regulation of phosphate metabolic process                 | 29    | 4,92E-05 | CCNT1, BDKRB1, BCCIP, TNFRSF4, APLP2, APP, APOA1, CXCR4, MDFIC, MAP3K2, IL1B, ADRA2B, INSR, CNK, SMAD7, SOCS1, ELANE, IGF2, CDC25C, CDKN3, SIRT2, ATXN1, PPP1R9B, INHBA, CDKN1A, PPP1R2, PRLR, HIPK3, MAP3K13                                                                                                                |
|                         | *GO:0042325                                          | Regulation of phosphorylation                             | 28    | 6,30E-05 | CCNT1, BDKRB1, BCCIP, TNFRSF4, APLP2, APP, APOA1, CXCR4, MDFIC, MAP3K2, IL1B, ADRA2B, INSR, CNK, SMAD7, SOCS1, ELANE, IGF2, CDC25C, CDKN3, SIRT2, ATXN1, INHBA, PPP1R9B, CDKN1A, PRLR, HIPK3, MAP3K13                                                                                                                        |

|                   |                                                               |                                                           |                                                        |           |                 |                                                                                                                                                                                                                                                                                                                            |
|-------------------|---------------------------------------------------------------|-----------------------------------------------------------|--------------------------------------------------------|-----------|-----------------|----------------------------------------------------------------------------------------------------------------------------------------------------------------------------------------------------------------------------------------------------------------------------------------------------------------------------|
|                   |                                                               | *GO:0043549                                               | Regulation of kinase activity                          | 21        | 8,63E-04        | CCNK, CCNT1, ELANE, BCCIP, IGF2, BDKRB1, CDC25C, CDKN3, TNFRSF4, APLP2, APP, CDKN1A, PRLR, CXCR4, MDIC, MAP3K2, HIPK3, IL1B, ADRA2B, INSR, MAP3K13                                                                                                                                                                         |
|                   |                                                               | *GO:0045859                                               | Regulation of protein kinase activity                  | 21        | 5,59E-04        | CCNK, CCNT1, ELANE, BCCIP, IGF2, BDKRB1, CDC25C, CDKN3, TNFRSF4, APLP2, APP, CDKN1A, PRLR, CXCR4, MDIC, MAP3K2, HIPK3, IL1B, ADRA2B, INSR, MAP3K13                                                                                                                                                                         |
|                   |                                                               | **GO:0000079                                              | Regulation of cyclin-dependent protein kinase activity | 6         | 1,19E-02        | CDKN1A, CCNK, CCNT1, BCCIP, CDKN3, CDC25C                                                                                                                                                                                                                                                                                  |
|                   |                                                               | *GO:0042326                                               | Negative regulation of phosphorylation                 | 7         | 9,27E-04        | ATXN1, INHBA, CDKN1A, SMAD7, SOCS1, BDKRB1, INSR                                                                                                                                                                                                                                                                           |
|                   |                                                               | *GO:0010563                                               | Negative regulation of phosphorus metabolic process    | 7         | 1,31E-03        | ATXN1, INHBA, CDKN1A, SMAD7, SOCS1, BDKRB1, INSR                                                                                                                                                                                                                                                                           |
|                   |                                                               | *GO:0045936                                               | Negative regulation of phosphate metabolic process     | 7         | 1,31E-03        | ATXN1, INHBA, CDKN1A, SMAD7, SOCS1, BDKRB1, INSR                                                                                                                                                                                                                                                                           |
|                   | *GO:0016311                                                   | Dephosphorylation                                         |                                                        | 11        | 6,13E-03        | MTMR14, NCEH1, SSH1, SSH2, PTPLA, PTPRU, MTMR9, PPP1CC, CDKN3, CDC25C, SACM1L                                                                                                                                                                                                                                              |
| <b>GO:0007242</b> | <b>Intracellular signaling cascade</b>                        |                                                           |                                                        | <b>44</b> | <b>2,79E-02</b> | <b>STAT5A, RASGEF1B, NFKBIA, RRAD, TP63, MYO9B, NR3C1, GNG12, APOA1, MCTP2, CXCR4, MAP3K2, MDIC, RHOB1, IL1B, KDM3A, NOS2, ADRA2B, INSR, PDK1, ARHGEF3, IL8, OPR1, LY96, SMAD7, SOCS1, PI4KA, IGF2, IFNAR1, DAPK1, CBLB, RPS6KA3, PRLR, GNAQ, HIPK1, NCOA4, MED17, UBR5, RAB14, CDC42BPA, JAK3, RAB13, MAP3K13, PHLD82</b> |
| *GO:0030522       | Intracellular receptor-mediated signaling pathway             |                                                           |                                                        | 6         | 4,20E-02        | NCOA4, MED17, UBR5, KDM3A, NOS2, NR3C1                                                                                                                                                                                                                                                                                     |
| *GO:0016055       | Wnt receptor signaling pathway                                |                                                           |                                                        | 10        | 7,03E-03        | CSNK2A2, SFRP5, HHEX, TBL1XR1, CHD8, LDB1, FBXW4, TLE3, TLE4, PTPRU                                                                                                                                                                                                                                                        |
| *GO:0051897       | Positive regulation of protein kinase B signaling cascade     |                                                           |                                                        | 3         | 3,05E-02        | GPX1, IGF2, INSR                                                                                                                                                                                                                                                                                                           |
| <b>GO:0042592</b> | <b>Homeostatic process</b>                                    |                                                           |                                                        | <b>40</b> | <b>1,85E-05</b> | <b>STAT5A, TMX4, FFAR1, BDKRB1, FOXO3, CCL28, GCLM, APLP2, MBP, GPX2, GSR, GPX1, APP, APOA1, CXCR4, IL1B, DYRK3, SLC22A5, EIF2B2, INSR, CLN3, SLC12A2, OPR1, SMAD7, ELANE, IGF2, SOD2, ABCG8, ATXN1, INHBA, CTSK, EP300, TNFSF13B, RHCG, PYGM, GNAQ, PYGL, PLN, HBZ, TXNRD1</b>                                            |
| *GO:0048878       | Chemical homeostasis                                          |                                                           |                                                        | 26        | 1,47E-03        | FFAR1, BDKRB1, FOXO3, GCLM, CCL28, APLP2, MBP, APP, APOA1, CXCR4, IL1B, EIF2B2, INSR, CLN3, SMAD7, OPR1, ELANE, IGF2, SOD2, ATXN1, ABCG8, RHCG, GNAQ, PYGM, PYGL, PLN                                                                                                                                                      |
|                   | *GO:0050801                                                   | Ion homeostasis                                           |                                                        | 19        | 1,79E-02        | CLN3, OPR1, SMAD7, ELANE, BDKRB1, CCL28, GCLM, APLP2, SOD2, MBP, ATXN1, APP, GNAQ, RHCG, PYGM, CXCR4, PLN, IL1B, EIF2B2                                                                                                                                                                                                    |
|                   | *GO:0033500                                                   | Carbohydrate homeostasis                                  |                                                        | 5         | 3,55E-02        | PYGL, FFAR1, IGF2, FOXO3, INSR                                                                                                                                                                                                                                                                                             |
|                   |                                                               | *GO:0042593                                               | Glucose homeostasis                                    | 5         | 3,55E-02        | PYGL, FFAR1, IGF2, FOXO3, INSR                                                                                                                                                                                                                                                                                             |
| *GO:0019725       | Cellular homeostasis                                          |                                                           |                                                        | 24        | 1,96E-03        | CLN3, SLC12A2, OPR1, SMAD7, TMX4, ELANE, BDKRB1, GCLM, CCL28, APLP2, SOD2, MBP, ATXN1, GPX1, GSR, APP, GNAQ, RHCG, PYGM, CXCR4, PLN, IL1B, TXNRD1, EIF2B2                                                                                                                                                                  |
|                   | *GO:0055082                                                   | Cellular chemical homeostasis                             |                                                        | 19        | 9,00E-03        | CLN3, OPR1, SMAD7, ELANE, BDKRB1, CCL28, GCLM, APLP2, SOD2, MBP, ATXN1, APP, GNAQ, RHCG, PYGM, CXCR4, PLN, IL1B, EIF2B2                                                                                                                                                                                                    |
|                   | *GO:0006873                                                   | Cellular ion homeostasis                                  |                                                        | 19        | 7,57E-03        | CLN3, OPR1, SMAD7, ELANE, BDKRB1, CCL28, GCLM, APLP2, SOD2, MBP, ATXN1, APP, GNAQ, RHCG, PYGM, CXCR4, PLN, IL1B, EIF2B2                                                                                                                                                                                                    |
| <b>GO:0010604</b> | <b>Positive regulation of macromolecule metabolic process</b> |                                                           |                                                        | <b>40</b> | <b>3,10E-04</b> | <b>STAT5A, NFKBIA, TP63, FOXO3, NR2E3, CITED2, APP, CHD8, MDIC, KLB1, IL1B, KDM3A, RARB, NFATC3, INSR, SAMD4A, CEBPA, TBL1XR1, CEBPB, SMAD7, KLF13, ELANE, IL9, IGF2, TBR1, PSMB8, ATF6, RNFB, ATXN1, INHBA, HHEX, CBLB, EP300, TNFSF13B, ETS1, NCOA4, MED17, IRF1, SH3D19, JAK3</b>                                       |
| *GO:0009891       | Positive regulation of biosynthetic process                   |                                                           |                                                        | 34        | 4,39E-04        | STAT5A, NFKBIA, TP63, FOXO3, NR2E3, CITED2, CHD8, APP, MDIC, IL1B, KDM3A, RARB, INSR, NFATC3, SAMD4A, CEBPA, TBL1XR1, CEBPB, KLF13, ELANE, IL9, IGF2, TBR1, SOD2, ATXN1, ATF6, INHBA, HHEX, EP300, ETS1, NCOA4, MED17, IRF1, JAK3                                                                                          |
|                   | *GO:0031328                                                   | Positive regulation of cellular biosynthetic process      |                                                        | 34        | 3,38E-04        | STAT5A, NFKBIA, TP63, FOXO3, NR2E3, CITED2, CHD8, APP, MDIC, IL1B, KDM3A, RARB, INSR, NFATC3, SAMD4A, CEBPA, TBL1XR1, CEBPB, KLF13, ELANE, IL9, IGF2, TBR1, SOD2, ATXN1, ATF6, INHBA, HHEX, EP300, ETS1, NCOA4, MED17, IRF1, JAK3                                                                                          |
|                   | *GO:0010557                                                   | Positive regulation of macromolecule biosynthetic process |                                                        | 33        | 3,18E-04        | STAT5A, NFKBIA, TP63, FOXO3, NR2E3, CITED2, CHD8, APP, MDIC, IL1B, KDM3A, RARB, INSR, NFATC3, SAMD4A, CEBPA, TBL1XR1, CEBPB, KLF13, ELANE, IL9, IGF2, TBR1, ATXN1, ATF6, INHBA, HHEX, EP300, ETS1, NCOA4, MED17, IRF1, JAK3                                                                                                |
| *GO:0010628       | Positive regulation of gene expression                        |                                                           |                                                        | 28        | 1,94E-03        | STAT5A, NFKBIA, TP63, FOXO3, NR2E3, CITED2, APP, CHD8, MDIC, KDM3A, RARB, NFATC3, CEBPA, TBL1XR1, CEBPB, KLF13, TBR1, ATF6, ATXN1, HHEX, INHBA, EP300, TNFSF13B, NCOA4, ETS1, MED17, IRF1, JAK3                                                                                                                            |
|                   | *GO:0045941                                                   | Positive regulation of transcription                      |                                                        | 27        | 2,65E-03        | STAT5A, NFKBIA, TP63, FOXO3, NR2E3, CITED2, APP, CHD8, MDIC, KDM3A, RARB, NFATC3, CEBPA, TBL1XR1, CEBPB, KLF13, TBR1, ATF6, ATXN1, HHEX, INHBA, EP300, NCOA4, ETS1, MED17, IRF1, JAK3                                                                                                                                      |
|                   | *GO:0045893                                                   | Positive regulation of transcription, DNA-dependent       |                                                        | 26        | 5,30E-04        | STAT5A, TP63, NFKBIA, FOXO3, NR2E3, CITED2, APP, CHD8, MDIC, RARB, NFATC3, CEBPA, TBL1XR1, CEBPB, KLF13, TBR1, ATF6, ATXN1, HHEX, INHBA, EP300, NCOA4, ETS1, MED17, IRF1, JAK3                                                                                                                                             |
|                   | *GO:0051254                                                   | Positive regulation of RNA metabolic process              |                                                        | 26        | 6,15E-04        | STAT5A, TP63, NFKBIA, FOXO3, NR2E3, CITED2, APP, CHD8, MDIC, RARB, NFATC3, CEBPA, TBL1XR1, CEBPB, KLF13, TBR1, ATF6, ATXN1, HHEX, INHBA, EP300, NCOA4, ETS1, MED17, IRF1, JAK3                                                                                                                                             |

|             |                                                                                              |                                             |                                              |                                  |          |                                                                                                                                                                                                                                                           |                                                                                                                                                  |
|-------------|----------------------------------------------------------------------------------------------|---------------------------------------------|----------------------------------------------|----------------------------------|----------|-----------------------------------------------------------------------------------------------------------------------------------------------------------------------------------------------------------------------------------------------------------|--------------------------------------------------------------------------------------------------------------------------------------------------|
| GO:0010941  | Regulation of cell death                                                                     |                                             |                                              | 36                               | 1,73E-03 | NUAK2, STAT5A, NFKBIA, TP63, PMAIP1, NR3C1, FOXO3, TNFRSF4, GCLM, CITED2, PEA15, GPX1, CHD8, APP, IL1B, RARB, CASP1, NQO1, TRAF3, CLN3, ARHGEF3, CEBPB, AIFM2, IGF2, SOD2, PROC, DAPK1, INHBA, CDKN1A, TNFSF13B, PRLR, HIPK1, ETS1, IGF2R, HIPK3, TNFAIP3 |                                                                                                                                                  |
| *GO:0043067 | Regulation of programmed cell death                                                          |                                             |                                              | 36                               | 1,63E-03 | NUAK2, STAT5A, NFKBIA, TP63, PMAIP1, NR3C1, FOXO3, TNFRSF4, GCLM, CITED2, PEA15, GPX1, CHD8, APP, IL1B, RARB, CASP1, NQO1, TRAF3, CLN3, ARHGEF3, CEBPB, AIFM2, IGF2, SOD2, PROC, DAPK1, INHBA, CDKN1A, TNFSF13B, PRLR, HIPK1, ETS1, IGF2R, HIPK3, TNFAIP3 |                                                                                                                                                  |
|             | *GO:0042981                                                                                  | Regulation of apoptosis                     |                                              | 36                               | 1,38E-03 | NUAK2, STAT5A, NFKBIA, TP63, PMAIP1, NR3C1, FOXO3, TNFRSF4, GCLM, CITED2, PEA15, GPX1, CHD8, APP, IL1B, RARB, CASP1, NQO1, TRAF3, CLN3, ARHGEF3, CEBPB, AIFM2, IGF2, SOD2, PROC, DAPK1, INHBA, CDKN1A, TNFSF13B, PRLR, HIPK1, ETS1, IGF2R, HIPK3, TNFAIP3 |                                                                                                                                                  |
|             |                                                                                              | *GO:0043065                                 | Positive regulation of apoptosis             | 19                               | 2,75E-02 | ARHGEF3, CEBPB, AIFM2, TP63, NR3C1, PMAIP1, FOXO3, DAPK1, INHBA, GPX1, CDKN1A, APP, HIPK1, ETS1, IL1B, RARB, NQO1, CASP1, TRAF3                                                                                                                           |                                                                                                                                                  |
|             |                                                                                              | *GO:0012502                                 | Induction of programmed cell death           | 15                               | 3,46E-02 | ARHGEF3, CEBPB, AIFM2, TP63, PMAIP1, FOXO3, DAPK1, INHBA, GPX1, APP, CDKN1A, HIPK1, ETS1, CASP1, TRAF3                                                                                                                                                    |                                                                                                                                                  |
|             |                                                                                              | *GO:0006917                                 | Induction of apoptosis                       | 15                               | 3,50E-02 | ARHGEF3, CEBPB, AIFM2, TP63, PMAIP1, FOXO3, DAPK1, INHBA, GPX1, APP, CDKN1A, HIPK1, ETS1, CASP1, TRAF3                                                                                                                                                    |                                                                                                                                                  |
|             |                                                                                              | *GO:0060548                                 | Negative regulation of cell death            | 21                               | 9,21E-04 | CLN3, CEBPB, NUAK2, STAT5A, NFKBIA, TP63, IGF2, GCLM, PROC, SOD2, DAPK1, CITED2, GPX1, PEA15, CDKN1A, CHD8, TNFSF13B, PRLR, HIPK3, IL1B, TNFAIP3                                                                                                          |                                                                                                                                                  |
|             |                                                                                              | *GO:0043069                                 | Negative regulation of programmed cell death | 21                               | 9,48E-04 | CLN3, CEBPB, NUAK2, STAT5A, NFKBIA, TP63, IGF2, GCLM, PROC, SOD2, DAPK1, CITED2, GPX1, PEA15, CDKN1A, CHD8, TNFSF13B, PRLR, HIPK3, IL1B, TNFAIP3                                                                                                          |                                                                                                                                                  |
|             |                                                                                              |                                             | *GO:0043066                                  | Negative regulation of apoptosis | 21       | 7,74E-04                                                                                                                                                                                                                                                  | CLN3, CEBPB, NUAK2, STAT5A, NFKBIA, TP63, IGF2, GCLM, PROC, SOD2, DAPK1, CITED2, GPX1, PEA15, CDKN1A, CHD8, TNFSF13B, PRLR, HIPK3, IL1B, TNFAIP3 |
| GO:0010033  | Response to organic substance                                                                |                                             |                                              | 35                               | 4,04E-04 | ME1, CGA, SLC6A1, STAT5A, PTGS1, NFKBIA, BDKRB1, PMAIP1, NR3C1, GNG12, TNFRSF11B, ACSL1, PLIN2, IL1B, KDM3A, CASP1, EIF2B2, INSR, SELP, APCS, KAT2B, ACTA1, LY96, ATP4B, SOCS1, FBP1, IGF2, PTPRU, APPL1, ATF6, CDKN1A, EP300, PYGM, DNAJB1, HSPB3        |                                                                                                                                                  |
| *GO:0009719 | Response to endogenous stimulus                                                              |                                             |                                              | 21                               | 3,77E-03 | ME1, CGA, KAT2B, SLC6A1, ACTA1, ATP4B, STAT5A, SOCS1, PTGS1, FBP1, IGF2, GNG12, PTPRU, APPL1, TNFRSF11B, CDKN1A, EP300, IL1B, KDM3A, EIF2B2, INSR                                                                                                         |                                                                                                                                                  |
|             | *GO:0009725                                                                                  | Response to hormone stimulus                |                                              | 20                               | 2,76E-03 | ME1, CGA, KAT2B, SLC6A1, ACTA1, STAT5A, PTGS1, SOCS1, FBP1, IGF2, GNG12, PTPRU, APPL1, TNFRSF11B, CDKN1A, EP300, IL1B, KDM3A, EIF2B2, INSR                                                                                                                |                                                                                                                                                  |
|             |                                                                                              | *GO:0032870                                 | Cellular response to hormone stimulus        | 9                                | 2,06E-02 | CGA, KAT2B, STAT5A, FBP1, KDM3A, IGF2, GNG12, APPL1, INSR                                                                                                                                                                                                 |                                                                                                                                                  |
| *GO:0032101 | Regulation of response to external stimulus                                                  |                                             |                                              | 11                               | 7,63E-03 | GPX2, SELP, CLN3, GPX1, MASP1, IL8, STAT5A, KLKB1, ELANE, IGF2, PROC                                                                                                                                                                                      |                                                                                                                                                  |
|             | *GO:0009617                                                                                  | Response to bacterium                       |                                              | 12                               | 1,07E-02 | CFP, GPX2, SELP, GPX1, CEBPE, ATP4B, LY96, SOCS1, NFKBIA, IL1B, BDKRB1, NOS2                                                                                                                                                                              |                                                                                                                                                  |
|             |                                                                                              | *GO:0032496                                 | Response to lipopolysaccharide               | 7                                | 1,37E-02 | SELP, ATP4B, LY96, SOCS1, NFKBIA, IL1B, BDKRB1                                                                                                                                                                                                            |                                                                                                                                                  |
| GO:0006357  | Regulation of transcription from RNA polymerase II promoter                                  |                                             |                                              | 34                               | 9,46E-04 | SUPT3H, STAT5A, NFKBIA, TP63, FOXO3, NR2E3, CITED2, CHD8, APP, RARB, NFATC3, CHD3, CEBPA, DNMT3A, TBL1XR1, CEBPB, SMAD7, KLF13, KLF11, TBR1, FOXO1, SOD2, ATXN1, ATF6, INHBA, HHEX, EP300, ETS1, MED17, HBZ, IRF1, TFAP2A, PHF21A, JAK3                   |                                                                                                                                                  |
| *GO:0045944 | Positive regulation of transcription from RNA polymerase II promoter                         |                                             |                                              | 24                               | 7,66E-05 | CEBPA, TBL1XR1, CEBPB, KLF13, STAT5A, NFKBIA, TP63, NR2E3, FOXO3, TBR1, CITED2, ATXN1, ATF6, INHBA, HHEX, CHD8, APP, EP300, ETS1, MED17, IRF1, RARB, JAK3, NFATC3                                                                                         |                                                                                                                                                  |
| *GO:0000122 | Negative regulation of transcription from RNA polymerase II promoter                         |                                             |                                              | 13                               | 3,97E-02 | CEBPA, DNMT3A, TBL1XR1, SMAD7, KLF11, TP63, NR2E3, FOXO1, CITED2, HHEX, HBZ, PHF21A, RARB                                                                                                                                                                 |                                                                                                                                                  |
| GO:0010605  | Negative regulation of macromolecule metabolic process                                       |                                             |                                              | 33                               | 2,11E-03 | EIF2C1, MASP1, TP63, BDKRB1, NR2E3, TNFRSF4, CITED2, WWP1, SERPINB10, RARB, KDM5B, INSR, CEBPA, DNMT3A, CLN3, TBL1XR1, SMAD7, ARID5B, LDB1, ELANE, KLF11, SOCS1, IGF2, PTPRU, FOXO1, PSMB8, SIRT2, ATXN1, INHBA, HHEX, TRPS1, HBZ, PHF21A                 |                                                                                                                                                  |
| *GO:0010558 | Negative regulation of macromolecule biosynthetic process                                    |                                             |                                              | 25                               | 6,70E-03 | EIF2C1, TP63, NR2E3, TNFRSF4, CITED2, WWP1, RARB, KDM5B, CEBPA, DNMT3A, TBL1XR1, SMAD7, LDB1, ARID5B, KLF11, ELANE, PTPRU, SIRT2, FOXO1, ATXN1, HHEX, INHBA, TRPS1, HBZ, PHF21A                                                                           |                                                                                                                                                  |
| GO:0009611  | Response to wounding                                                                         |                                             |                                              | 33                               | 5,54E-06 | ABCF1, ITGAL, PLDN, MASP1, F13A1, CXCL2, BDKRB1, ABHD2, TNFRSF4, DTNBP1, CCL4, TPM1, CFP, GPX1, IL17D, CXCR4, IL10RB, KLKB1, IL1B, NFATC3, SELP, CEBPB, APCS, IL8, LY96, IL9, STXBP1, CHST3, IGF2, SOD2, PROC, LYVE1, GNAQ                                |                                                                                                                                                  |
| *GO:0006954 | Inflammatory response                                                                        |                                             |                                              | 21                               | 2,62E-04 | ABCF1, SELP, ITGAL, APCS, CEBPB, MASP1, IL8, LY96, CXCL2, IL9, IGF2, BDKRB1, TNFRSF4, CCL4, CFP, IL17D, CXCR4, IL10RB, KLKB1, IL1B, NFATC3                                                                                                                |                                                                                                                                                  |
|             | *GO:0050727                                                                                  | Regulation of inflammatory response         |                                              | 7                                | 1,29E-02 | GPX2, GPX1, MASP1, STAT5A, KLKB1, ELANE, IGF2                                                                                                                                                                                                             |                                                                                                                                                  |
|             |                                                                                              | *GO:0050728                                 | Negative regulation of inflammatory response | 4                                | 4,37E-02 | GPX2, GPX1, ELANE, IGF2                                                                                                                                                                                                                                   |                                                                                                                                                  |
| GO:0030888  | Regulation of B cell proliferation                                                           |                                             |                                              | 4                                | 3,34E-02 | CDKN1A, TNFSF13B, IL13RA1, TNFRSF4                                                                                                                                                                                                                        |                                                                                                                                                  |
|             | *GO:0030890                                                                                  | Positive regulation of B cell proliferation |                                              | 4                                | 1,35E-02 | CDKN1A, TNFSF13B, IL13RA1, TNFRSF4                                                                                                                                                                                                                        |                                                                                                                                                  |
| GO:0051173  | Positive regulation of nitrogen compound metabolic process                                   |                                             |                                              | 32                               | 5,21E-04 | STAT5A, NFKBIA, TP63, FOXO3, NR2E3, CITED2, CHD8, APP, MDIC, IL1B, KDM3A, RARB, INSR, NFATC3, CEBPA, TBL1XR1, CEBPB, KLF13, IGF2, TBR1, SOD2, RNF8, ATF6, ATXN1, INHBA, HHEX, EP300, ETS1, NCOA4, MED17, IRF1, JAK3                                       |                                                                                                                                                  |
| *GO:0045935 | Positive regulation of nucleobase, nucleoside, nucleotide and nucleic acid metabolic process |                                             |                                              | 30                               | 1,35E-03 | STAT5A, NFKBIA, TP63, FOXO3, NR2E3, CITED2, APP, CHD8, MDIC, KDM3A, RARB, INSR, NFATC3, CEBPA, TBL1XR1, CEBPB, KLF13, IGF2, TBR1, ATF6, RNF8, ATXN1, HHEX, INHBA, EP300, NCOA4, ETS1, MED17, IRF1, JAK3                                                   |                                                                                                                                                  |

|             |                                                                                              |                                                           |                                       |    |          |                                                                                                                                                                                                           |
|-------------|----------------------------------------------------------------------------------------------|-----------------------------------------------------------|---------------------------------------|----|----------|-----------------------------------------------------------------------------------------------------------------------------------------------------------------------------------------------------------|
| GO:0016265  | Death                                                                                        |                                                           |                                       | 29 | 1,82E-02 | PHLPP1, NUA2, NFKBIA, TP63, FOXO3, PMAIP1, GPX1, PEA15, TNFRSF11B, APP, CXCR4, IL1B, CASP1, TRAF3, CLN3, ARHGEF3, AIFM2, KLF11, APTX, IGF2, IL24, SOD2, DAPK1, ATXN1, SFRP5, EP300, HIPK3, TNFAIP3, DRAM1 |
| *GO:0008219 | Cell death                                                                                   |                                                           |                                       | 29 | 1,70E-02 | PHLPP1, NUA2, NFKBIA, TP63, FOXO3, PMAIP1, GPX1, PEA15, TNFRSF11B, APP, CXCR4, IL1B, CASP1, TRAF3, CLN3, ARHGEF3, AIFM2, KLF11, APTX, IGF2, IL24, SOD2, DAPK1, ATXN1, SFRP5, EP300, HIPK3, TNFAIP3, DRAM1 |
|             | *GO:0012501                                                                                  | Programmed cell death                                     |                                       | 25 | 2,39E-02 | PHLPP1, NUA2, TP63, NFKBIA, FOXO3, PMAIP1, GPX1, PEA15, TNFRSF11B, APP, CXCR4, IL1B, CASP1, TRAF3, ARHGEF3, AIFM2, KLF11, IL24, SOD2, DAPK1, SFRP5, EP300, HIPK3, TNFAIP3, DRAM1                          |
|             | *GO:0006915                                                                                  | Apoptosis                                                 |                                       | 25 | 2,05E-02 | PHLPP1, NUA2, TP63, NFKBIA, FOXO3, PMAIP1, GPX1, PEA15, TNFRSF11B, APP, CXCR4, IL1B, CASP1, TRAF3, ARHGEF3, AIFM2, KLF11, IL24, SOD2, DAPK1, SFRP5, EP300, HIPK3, TNFAIP3, DRAM1                          |
|             |                                                                                              | *GO:0008637                                               | Apoptotic mitochondrial changes       | 4  | 4,33E-02 | GPX1, AIFM2, PMAIP1, SOD2                                                                                                                                                                                 |
| GO:0032268  | Regulation of cellular protein metabolic process                                             |                                                           |                                       | 27 | 2,10E-04 | EIF2C1, MASP1, NFKBIA, BDKRB1, MTF13, ZFP36L1, APP, APOA1, MDFIC, MAP3K2, KLKB1, SERPINB10, IL1B, EIF2B2, INSR, SAMD4A, CLN3, SMAD7, SOCS1, IGF2, PSMB8, EIF4G1, PPP1R9B, EIF4G3, EP300, HIPK3, SH3D19    |
| *GO:0051248 | Negative regulation of protein metabolic process                                             |                                                           |                                       | 10 | 4,97E-02 | CLN3, EIF2C1, MASP1, SMAD7, SOCS1, SERPINB10, BDKRB1, IGF2, INSR, PSMB8                                                                                                                                   |
|             | *GO:0032269                                                                                  | Negative regulation of cellular protein metabolic process |                                       | 10 | 4,07E-02 | CLN3, EIF2C1, MASP1, SMAD7, SOCS1, SERPINB10, BDKRB1, IGF2, INSR, PSMB8                                                                                                                                   |
| *GO:0030162 | Regulation of proteolysis                                                                    |                                                           |                                       | 9  | 5,37E-05 | CLN3, EP300, MASP1, SMAD7, KLKB1, SERPINB10, IL1B, IGF2, SH3D19                                                                                                                                           |
|             | *GO:0045862                                                                                  | Positive regulation of proteolysis                        |                                       | 5  | 3,44E-03 | EP300, SMAD7, KLKB1, IL1B, SH3D19                                                                                                                                                                         |
|             | *GO:0045861                                                                                  | Negative regulation of proteolysis                        |                                       | 4  | 1,75E-02 | CLN3, MASP1, SERPINB10, IGF2                                                                                                                                                                              |
| GO:0009890  | Negative regulation of biosynthetic process                                                  |                                                           |                                       | 26 | 4,86E-03 | EIF2C1, TP63, NR2E3, TNFRSF4, CITED2, WWP1, RARB, KDM5B, CEBPA, DNMT3A, TBL1XR1, SMAD7, LDB1, ARID5B, KLF11, ELANE, IGF2, PTPRU, SIRT2, FOXP1, ATXN1, HHEX, INHBA, TRPS1, HBZ, PHF21A                     |
| *GO:0031327 | Negative regulation of cellular biosynthetic process                                         |                                                           |                                       | 26 | 6,15E-03 | EIF2C1, TP63, NR2E3, TNFRSF4, CITED2, WWP1, RARB, KDM5B, CEBPA, DNMT3A, TBL1XR1, SMAD7, LDB1, ARID5B, KLF11, ELANE, IGF2, PTPRU, SIRT2, FOXP1, ATXN1, HHEX, INHBA, TRPS1, HBZ, PHF21A                     |
| GO:0010629  | Negative regulation of gene expression                                                       |                                                           |                                       | 24 | 4,98E-03 | CEBPA, DNMT3A, TBL1XR1, EIF2C1, SMAD7, ARID5B, LDB1, KLF11, TP63, NR2E3, PTPRU, TNFRSF4, FOXF1, SIRT2, CITED2, ATXN1, HHEX, WWP1, TRPS1, HBZ, PHF21A, RARB, INSR, KDM5B                                   |
| *GO:0016481 | Negative regulation of transcription                                                         |                                                           |                                       | 22 | 7,05E-03 | CEBPA, DNMT3A, TBL1XR1, SMAD7, ARID5B, LDB1, KLF11, TP63, NR2E3, PTPRU, TNFRSF4, SIRT2, FOXF1, CITED2, ATXN1, HHEX, WWP1, TRPS1, HBZ, PHF21A, RARB, KDM5B                                                 |
|             | *GO:0045892                                                                                  | Negative regulation of transcription, DNA-dependent       |                                       | 19 | 4,48E-03 | CEBPA, DNMT3A, TBL1XR1, SMAD7, ARID5B, LDB1, KLF11, TP63, NR2E3, TNFRSF4, SIRT2, FOXF1, CITED2, HHEX, TRPS1, HBZ, PHF21A, RARB, KDM5B                                                                     |
| GO:0033554  | Cellular response to stress                                                                  |                                                           |                                       | 24 | 1,90E-02 | MORF4L1, RAD23B, CLN3, NUA2, POLG, CHST3, APTX, TP63, BCCIP, FOXO3, RAD52, TPM1, SOD2, RNFB, ATF6, GPX1, CDKN1A, HIPK1, MDFIC, MAP3K2, FANCD2, UBR5, MYOF, MAP3K13                                        |
| *GO:0006979 | Response to oxidative stress                                                                 |                                                           |                                       | 11 | 9,21E-03 | ANGPTL7, GPX2, GPX1, EP300, PTGS1, APTX, CA3, NQO1, TPM1, GCLM, SOD2                                                                                                                                      |
| *GO:0006952 | Defense response                                                                             |                                                           |                                       | 25 | 2,56E-02 | ABCF1, ITGAL, MASP1, CXCL2, BDKRB1, TNFRSF4, CCL4, CFP, IL17D, IL10RB, CXCR4, KLKB1, IL1B, NOS2, TNIP1, NFATC3, SELP, APC5, CEBPB, IL8, CEBPE, LY96, IL9, IGF2, INHBA                                     |
| GO:0051172  | Negative regulation of nitrogen compound metabolic process                                   |                                                           |                                       | 22 | 2,55E-02 | CEBPA, DNMT3A, TBL1XR1, SMAD7, ARID5B, LDB1, KLF11, TP63, NR2E3, PTPRU, TNFRSF4, SIRT2, FOXF1, CITED2, ATXN1, HHEX, WWP1, TRPS1, HBZ, PHF21A, RARB, KDM5B                                                 |
| *GO:0045934 | Negative regulation of nucleobase, nucleoside, nucleotide and nucleic acid metabolic process |                                                           |                                       | 22 | 2,15E-02 | CEBPA, DNMT3A, TBL1XR1, SMAD7, ARID5B, LDB1, KLF11, TP63, NR2E3, PTPRU, TNFRSF4, SIRT2, FOXF1, CITED2, ATXN1, HHEX, WWP1, TRPS1, HBZ, PHF21A, RARB, KDM5B                                                 |
|             | *GO:0051253                                                                                  | Negative regulation of RNA metabolic process              |                                       | 19 | 5,29E-03 | CEBPA, DNMT3A, TBL1XR1, SMAD7, ARID5B, LDB1, KLF11, TP63, NR2E3, TNFRSF4, SIRT2, FOXF1, CITED2, HHEX, TRPS1, HBZ, PHF21A, RARB, KDM5B                                                                     |
| GO:0051338  | Regulation of transferase activity                                                           |                                                           |                                       | 22 | 5,87E-04 | CCNK, CCNT1, ELANE, BCCIP, IGF2, BDKRB1, CDC25C, CDKN3, TNFRSF4, APLP2, APP, CDKN1A, APOA1, PRLR, CXCR4, MDFIC, MAP3K2, HIPK3, IL1B, ADRA2B, INSR, MAP3K13                                                |
| GO:0006928  | Cell motion                                                                                  |                                                           |                                       | 21 | 1,95E-02 | SELP, ITGAL, ZFAND5, TLN1, IL8, ARID5B, ELANE, ARPC5, CCL4, TPM1, TBR1, ARPC1B, GPX1, EPHA4, LYVE1, APP, APOA1, CXCR4, ETS1, IL1B, MSN                                                                    |
| *GO:0051270 | Regulation of cell motion                                                                    |                                                           |                                       | 13 | 3,89E-03 | SELP, SMAD7, CHST3, IGF2, BDKRB1, ABHD2, PTPRU, TPM1, CITED2, ETS1, CLIC4, CXCR4, INSR                                                                                                                    |
|             | *GO:0030334                                                                                  | Regulation of cell migration                              |                                       | 11 | 1,12E-02 | SELP, CXCR4, SMAD7, CLIC4, ABHD2, BDKRB1, IGF2, PTPRU, INSR, TPM1, CITED2                                                                                                                                 |
|             |                                                                                              | *GO:0030336                                               | Negative regulation of cell migration | 6  | 1,47E-02 | SMAD7, CLIC4, ABHD2, PTPRU, TPM1, CITED2                                                                                                                                                                  |
|             |                                                                                              | **GO:0051271                                              | Negative regulation of cell motion    | 6  | 2,18E-02 | SMAD7, CLIC4, ABHD2, PTPRU, TPM1, CITED2                                                                                                                                                                  |
| GO:0051276  | Chromosome organization                                                                      |                                                           |                                       | 20 | 4,15E-02 | MORF4L1, SUPT3H, DNMT3A, TBL1XR1, DPF3, KAT2B, AIFM2, NR3C1, SIRT2, RNFB, CHD8, EP300, KDM2A, FANCD2, CABIN1, PHF21A, KDM3A, KDM5B, CHD3, SUV420H1                                                        |
| *GO:0006325 | Chromatin organization                                                                       |                                                           |                                       | 18 | 1,69E-02 | MORF4L1, SUPT3H, DNMT3A, TBL1XR1, DPF3, KAT2B, NR3C1, SIRT2, RNFB, CHD8, EP300, KDM2A, CABIN1, PHF21A, KDM3A, KDM5B, CHD3, SUV420H1                                                                       |
|             | *GO:0016568                                                                                  | Chromatin modification                                    |                                       | 18 | 6,57E-04 | MORF4L1, SUPT3H, DNMT3A, TBL1XR1, DPF3, KAT2B, NR3C1, SIRT2, RNFB, CHD8, EP300, KDM2A, CABIN1, PHF21A, KDM3A, KDM5B, CHD3, SUV420H1                                                                       |
|             |                                                                                              | *GO:0016569                                               | Covalent chromatin modification       | 9  | 1,51E-02 | RNFB, MORF4L1, SUPT3H, DNMT3A, EP300, KAT2B, KDM3A, SIRT2, SUV420H1                                                                                                                                       |
|             |                                                                                              | *GO:0016570                                               | Histone modification                  | 8  | 3,62E-02 | RNFB, MORF4L1, SUPT3H, EP300, KAT2B, KDM3A, SIRT2, SUV420H1                                                                                                                                               |
| GO:0002684  | Positive regulation of immune system process                                                 |                                                           |                                       | 19 | 3,97E-05 | PLDN, MASP1, STAT5A, CD247, NFKBIA, BDKRB1, TNFRSF4, AQP3, FOXF1, CFP, CBLB, CDKN1A, TNFSF13B, IL4R, IL1B, CD79A, NOS2, IL13RA1, CD226                                                                    |

|              |                                                       |  |    |          |                                                                                                                               |
|--------------|-------------------------------------------------------|--|----|----------|-------------------------------------------------------------------------------------------------------------------------------|
| *GO:0002697  | Regulation of immune effector process                 |  | 10 | 1,09E-03 | APOA1, MASP1, STAT5A, IL1B, IGF2, NOS2, IL13RA1, TNFRSF4, CD226, FOXP1                                                        |
| *GO:0002699  | Positive regulation of immune effector process        |  | 6  | 5,03E-03 | STAT5A, IL1B, NOS2, IL13RA1, CD226, FOXP1                                                                                     |
| GO:0032774   | RNA biosynthetic process                              |  | 17 | 3,81E-03 | BATF3, CEBPA, SUPT3H, CCNK, CEBPB, KLF13, CCNT1, KLF11, NR3C1, NR2E3, PRDM4, ETS1, MED17, TRPS1, IRF1, GTF3C1, NFATC3         |
| *GO:0006351  | Transcription, DNA-dependent                          |  | 17 | 3,33E-03 | BATF3, CEBPA, SUPT3H, CCNK, CEBPB, KLF13, CCNT1, KLF11, NR3C1, NR2E3, PRDM4, ETS1, MED17, TRPS1, IRF1, GTF3C1, NFATC3         |
| *GO:0006366  | Transcription from RNA polymerase II promoter         |  | 16 | 9,69E-04 | BATF3, CEBPA, SUPT3H, CCNK, CEBPB, KLF13, CCNT1, KLF11, NR2E3, NR3C1, PRDM4, ETS1, MED17, TRPS1, IRF1, NFATC3                 |
| GO:0051726   | Regulation of cell cycle                              |  | 18 | 4,99E-03 | CCNK, STAT5A, CCNT1, BCCIP, IGF2, CDC25C, CDKN3, SIRT2, CITED2, CSNK2A2, PPP1R9B, INHBA, APP, CDKN1A, PRDM4, ETS1, IL1B, INSR |
| *GO:0045787  | Positive regulation of cell cycle                     |  | 6  | 4,95E-02 | APP, STAT5A, TGFA, IGF2, INSR, CITED2                                                                                         |
| GO:0040008   | Regulation of growth                                  |  | 16 | 2,82E-02 | MORF4L1, CGA, STAT5A, SOCS1, TP63, BDKRB1, TKT, IGF2, DDR2, PPP1R9B, INHBA, CDKN1A, APP, EP300, PRDM4, INSR                   |
| GO:0046903   | Secretion                                             |  | 14 | 4,35E-02 | SNAP29, SCAMP1, CGA, PLDN, LTBP2, STX2, FFAR1, STXBP1, AQP3, ABCG8, TNFSF13B, SYN1, SCFD2, RAB14                              |
| *GO:0032940  | Secretion by cell                                     |  | 12 | 1,70E-02 | SCAMP1, SNAP29, CGA, PLDN, TNFSF13B, STX2, SYN1, LTBP2, SCFD2, FFAR1, STXBP1, RAB14                                           |
| *GO:0050707  | Regulation of cytokine secretion                      |  | 4  | 3,99E-02 | APOA1, IGF2, CASP1, TNFRSF4                                                                                                   |
| GO:0040012   | Regulation of locomotion                              |  | 13 | 3,73E-03 | SELP, IL8, CXCR4, SMAD7, CLIC4, ELANE, ABHD2, BDKRB1, IGF2, PTPRU, INSR, TPM1, CITED2                                         |
| *GO:0040013  | Negative regulation of locomotion                     |  | 7  | 4,49E-03 | SMAD7, CLIC4, ELANE, ABHD2, PTPRU, TPM1, CITED2                                                                               |
| GO:0006916   | Anti-apoptosis                                        |  | 14 | 2,44E-03 | CEBPB, STAT5A, TP63, NFKBIA, DAPK1, CITED2, SOD2, PEA15, GPX1, TNFSF13B, PRLR, HIPK3, IL1B, TNFAIP3                           |
| GO:0007507   | Heart development                                     |  | 13 | 8,99E-03 | SMAD7, PDLIM3, TPM1, FOXP1, SOD2, CITED2, HHEX, EP300, GNAQ, PLN, RARB, NFATC3, INSR                                          |
| GO:0003006   | Developmental process involved in reproduction        |  | 13 | 3,60E-02 | CGA, DZIP1, STAT5A, TP63, FOXO3, NR2C2, CITED2, INHBA, CXCR4, NCOA4, EIF2B2, LHB, INSR                                        |
| *GO:0048608  | Reproductive structure development                    |  | 8  | 4,19E-02 | CGA, INHBA, NCOA4, STAT5A, TP63, FOXO3, EIF2B2, LHB                                                                           |
| *GO:0045137  | Development of primary sexual characteristics         |  | 8  | 4,34E-02 | CGA, INHBA, NCOA4, STAT5A, TP63, FOXO3, EIF2B2, LHB                                                                           |
| GO:0050865   | Regulation of cell activation                         |  | 13 | 1,78E-03 | SELP, INHBA, CDKN1A, CBLB, PLDN, SIT1, TNFSF13B, STAT5A, IL4R, IL1B, IL13RA1, TNFRSF4, CD226                                  |
| *GO:0002694  | Regulation of leukocyte activation                    |  | 12 | 3,55E-03 | INHBA, CDKN1A, CBLB, PLDN, SIT1, TNFSF13B, STAT5A, IL4R, IL1B, IL13RA1, TNFRSF4, CD226                                        |
| **GO:0051249 | Regulation of lymphocyte activation                   |  | 11 | 4,65E-03 | INHBA, CDKN1A, CBLB, PLDN, SIT1, TNFSF13B, STAT5A, IL4R, IL1B, IL13RA1, TNFRSF4                                               |
| *GO:0050864  | Regulation of B cell activation                       |  | 6  | 9,31E-03 | INHBA, CDKN1A, TNFSF13B, STAT5A, IL13RA1, TNFRSF4                                                                             |
| GO:0007517   | Muscle organ development                              |  | 12 | 1,93E-02 | FAM65B, ZFAND5, APP, EP300, ACTA1, SMAD7, PLN, ARID5B, TP63, RARB, TPM1, FOXP1                                                |
| *GO:0060537  | Muscle tissue development                             |  | 10 | 4,62E-03 | ZFAND5, APP, EP300, ACTA1, SMAD7, PLN, TP63, RARB, TPM1, FOXP1                                                                |
| *GO:0014706  | Striated muscle tissue development                    |  | 8  | 3,22E-02 | APP, EP300, ACTA1, SMAD7, PLN, RARB, TPM1, FOXP1                                                                              |
| *GO:0048745  | Smooth muscle tissue development                      |  | 3  | 2,06E-02 | ZFAND5, TP63, FOXP1                                                                                                           |
| GO:0009991   | Response to extracellular stimulus                    |  | 12 | 2,53E-02 | PPP1R9B, CLN3, CDKN1A, TNFRSF11B, ACSL1, ACTA1, NUAK2, GDAPI1, SLC22A3, INSR, AQP3, SOD2                                      |
| GO:0030029   | Actin filament-based process                          |  | 12 | 4,44E-02 | PPP1R9B, TLN1, SSH1, ACTA1, NUAK2, DIAPH1, SSH2, CDC42BPA, PDLIM3, MYO9B, ARPC5, TPM1                                         |
| *GO:0030036  | Actin cytoskeleton organization                       |  | 12 | 3,00E-02 | PPP1R9B, TLN1, SSH1, ACTA1, NUAK2, DIAPH1, SSH2, CDC42BPA, PDLIM3, MYO9B, ARPC5, TPM1                                         |
| GO:0030097   | Hemopoiesis                                           |  | 12 | 3,94E-02 | CEBPA, CSF3, INHBA, SNRK, CEBPE, STAT5A, HBZ, IRF1, DYRK3, CD79A, FOXP1, SOD2                                                 |
| GO:0032844   | Regulation of homeostatic process                     |  | 10 | 2,49E-03 | INHBA, TNFRSF11B, ETS1, SMAD7, LDB1, STAT5A, BDKRB1, FOXO3, SLC22A5, GCLM                                                     |
| *GO:0001817  | Regulation of cytokine production                     |  | 11 | 1,75E-02 | INHBA, CEBPB, APOA1, STAT5A, IL9, ELANE, IRF1, IGF2, CASP1, TNFRSF4, IFNAR1                                                   |
| GO:0010035   | Response to inorganic substance                       |  | 11 | 3,70E-02 | GPX1, CDKN1A, TNFRSF11B, EP300, SLC6A1, CYBRD1, APTX, INSR, TPM1, AQP3, SOD2                                                  |
| GO:0010608   | Posttranscriptional regulation of gene expression     |  | 11 | 4,36E-02 | ZFP36L1, EIF4G1, EIF4G3, APP, APOA1, EIF2C1, SMAD7, APTX, EIF2B2, MTIF3, SAMD4A                                               |
| GO:0005976   | Polysaccharide metabolic process                      |  | 10 | 2,08E-03 | LYVE1, PPP1R2, SLC35D1, PYGM, PYGL, CSGALNACT2, CHI3L1, CHST3, MAT2B, PPP1CC                                                  |
| *GO:0044264  | Cellular polysaccharide metabolic process             |  | 6  | 1,09E-02 | PPP1R2, PYGM, PYGL, CSGALNACT2, MAT2B, PPP1CC                                                                                 |
| *GO:0000272  | Polysaccharide catabolic process                      |  | 4  | 3,34E-02 | LYVE1, PYGM, PYGL, CHI3L1                                                                                                     |
| GO:0006790   | Sulfur metabolic process                              |  | 10 | 2,65E-03 | TPK1, GSR, GPX1, SLC35D1, STAT5A, CSGALNACT2, CHST3, MAT2B, GCLM, SOD2                                                        |
| *GO:0044272  | Sulfur compound biosynthetic process                  |  | 6  | 8,57E-03 | TPK1, SLC35D1, CSGALNACT2, CHST3, MAT2B, GCLM                                                                                 |
| *GO:0050650  | Chondroitin sulfate proteoglycan biosynthetic process |  | 3  | 3,05E-02 | SLC35D1, CSGALNACT2, CHST3                                                                                                    |
| *GO:0006749  | Glutathione metabolic process                         |  | 4  | 3,34E-02 | GSR, GPX1, GCLM, SOD2                                                                                                         |
| GO:0003013   | Circulatory system process                            |  | 10 | 4,84E-02 | GPX1, RENBP, PLN, PTGS1, BDKRB1, NOS2, MYOF, TPM1, GCLM, SOD2                                                                 |
| *GO:0008015  | Blood circulation                                     |  | 10 | 4,84E-02 | GPX1, RENBP, PLN, PTGS1, BDKRB1, NOS2, MYOF, TPM1, GCLM, SOD2                                                                 |
| GO:0050867   | Positive regulation of cell activation                |  | 9  | 7,36E-03 | SELP, CDKN1A, PLDN, TNFSF13B, STAT5A, IL4R, IL13RA1, TNFRSF4, CD226                                                           |
| *GO:0002696  | Positive regulation of leukocyte activation           |  | 8  | 1,85E-02 | CDKN1A, PLDN, TNFSF13B, STAT5A, IL4R, IL13RA1, TNFRSF4, CD226                                                                 |
| *GO:0051251  | Positive regulation of lymphocyte                     |  | 7  | 3,72E-02 | CDKN1A, PLDN, TNFSF13B, STAT5A, IL4R, IL13RA1, TNFRSF4                                                                        |
| *GO:0042110  | T cell activation                                     |  | 9  | 1,51E-02 | ITGAL, CBLB, PRLR, CXCR4, STAT5A, IRF1, IGF2, TNFRSF4, IFNAR1                                                                 |
| *GO:0050871  | Positive regulation of B cell activation              |  | 5  | 9,40E-03 | CDKN1A, TNFSF13B, STAT5A, IL13RA1, TNFRSF4                                                                                    |

|             |                                                                 |   |          |                                                  |
|-------------|-----------------------------------------------------------------|---|----------|--------------------------------------------------|
| GO:0002683  | Negative regulation of immune system process                    | 7 | 1,90E-02 | GPX2, INHBA, GPX1, CBLB, MASP1, IL4R, IGF2       |
| GO:0030099  | Myeloid cell differentiation                                    | 7 | 3,11E-02 | CEBPA, CSF3, INHBA, SNRK, CEBPE, HBZ, DYRK3      |
| *GO:0045637 | Regulation of myeloid cell differentiation                      | 6 | 3,26E-02 | INHBA, ETS1, LDB1, STAT5A, NFKBIA, FOXO3         |
|             | *GO:0045638 Negative regulation of myeloid cell differentiation | 4 | 3,99E-02 | INHBA, LDB1, STAT5A, NFKBIA                      |
| GO:0048585  | Negative regulation of response to stimulus                     | 7 | 4,21E-02 | GPX2, CLN3, GPX1, MASP1, SOCS1, ELANE, IGF2      |
| *GO:0032102 | Negative regulation of response to external stimulus            | 5 | 3,79E-02 | GPX2, CLN3, GPX1, ELANE, IGF2                    |
| *GO:0050777 | Negative regulation of immune response                          | 4 | 5,61E-02 | GPX2, GPX1, MASP1, IGF2                          |
| GO:0050817  | Coagulation                                                     | 7 | 4,57E-02 | PLDN, GNAQ, KLKB1, F13A1, STXBP1, DTNBP1, PROC   |
| *GO:0007596 | Blood coagulation                                               | 7 | 4,57E-02 | PLDN, GNAQ, KLKB1, F13A1, STXBP1, DTNBP1, PROC   |
| GO:0007050  | Cell cycle arrest                                               | 7 | 4,75E-02 | PPP1R9B, INHBA, CDKN1A, KAT2B, IL8, CDKN3, UHMK1 |
| GO:0042035  | Regulation of cytokine biosynthetic process                     | 6 | 4,00E-02 | INHBA, CEBPB, STAT5A, IL9, ELANE, IRF1           |
| GO:0045646  | Regulation of erythrocyte differentiation                       | 5 | 9,48E-04 | INHBA, ETS1, LDB1, STAT5A, FOXO3                 |
| *GO:0045648 | Positive regulation of erythrocyte differentiation              | 3 | 3,05E-02 | INHBA, ETS1, FOXO3                               |
| GO:0018212  | Peptidyl-tyrosine modification                                  | 5 | 3,33E-02 | PRLR, STAT5A, JAK3, INSR, DDR2                   |
| *GO:0018108 | Peptidyl-tyrosine phosphorylation                               | 5 | 2,90E-02 | PRLR, STAT5A, JAK3, INSR, DDR2                   |
| GO:0009896  | Positive regulation of catabolic process                        | 5 | 3,55E-02 | CBLB, SMAD7, IGF2, SH3D19, INSR                  |
| GO:0045444  | Fat cell differentiation                                        | 5 | 4,54E-02 | CEBPA, GPX1, CEBPB, SOCS1, INSR                  |
| GO:0001889  | Liver development                                               | 5 | 4,54E-02 | CEBPA, HHEX, EP300, SOD2, CITED2                 |
| GO:0045682  | Regulation of epidermis development                             | 4 | 1,75E-02 | INHBA, TP63, KEAP1, AQP3                         |
| GO:0015695  | Organic cation transport                                        | 4 | 4,55E-02 | RHCG, SLC12A2, SLC22A3, SLC22A5                  |
| GO:0000272  | Polysaccharide catabolic process                                | 4 | 3,34E-02 | LYVE1, PYGM, PYGL, CHI3L1                        |
| GO:0030856  | Regulation of epithelial cell differentiation                   | 4 | 3,66E-02 | PRLR, STAT5A, TP63, AQP3                         |
| GO:0022406  | Membrane docking                                                | 4 | 4,33E-02 | PLDN, SCFD2, STXBP1, MSN                         |
| GO:0030325  | Adrenal gland development                                       | 3 | 2,54E-02 | APOA1, NR3C1, CITED2                             |
| GO:0044058  | Regulation of digestive system process                          | 3 | 3,05E-02 | ABCG8, APOA1, SLC22A5                            |
| GO:0045604  | Regulation of epidermal cell differentiation                    | 3 | 4,80E-02 | TP63, KEAP1, AQP3                                |
| *Subset     | **Part of                                                       |   |          |                                                  |
