# Supplementary material for: Transcriptomic Analysis of Porcine Endometrium during Implantation after In Vitro Stimulation by Adiponectin
Source: MDPI journal article supplement (doi:10.3390/ijms20061335), 2019-03-16
Supplement: s1 [file s1]

Supplementary Table 1

## List of differentially expressed genes

| ProbeName    | Official Gene Symbol | Fold-change | P-value | Regulation | Description                                                                                                                              |
|--------------|----------------------|-------------|---------|------------|------------------------------------------------------------------------------------------------------------------------------------------|
| A_72_P196792 |                      | 3,9660      | 0,0441  | up         | 354318 MARC 1PIG Sus scrofa cDNA 5', mRNA sequence                                                                                       |
| A_72_P222917 |                      | 3,2637      | 0,0138  | up         | 1140898 MARC 4PIG Sus scrofa cDNA 3', mRNA sequence                                                                                      |
| A_72_P358918 |                      | 3,2505      | 0,0453  | up         | MI-P-AY0-ncm-b-03-0-UI.s1 MI-P-AY0 Sus scrofa cDNA clone MI-P-AY0-ncm-b-03-0-UI 3', mRNA sequence                                        |
| A_72_P350158 |                      | 2,8920      | 0,0423  | up         | Pig DNA sequence from clone CH242-171P20 on chromosome X, complete sequence                                                              |
| A_72_P337643 |                      | 2,8861      | 0,0078  | up         | gdtca_Cluster4852 Developing mandibular deciduous molars of the miniature pig cDNA library Sus scrofa cDNA, mRNA sequence                |
| A_72_P408928 |                      | 2,8554      | 0,0332  | up         | Sus scrofa mRNA, clone:LNG010043B04, expressed in lung.                                                                                  |
| A_72_P401428 |                      | 2,8475      | 0,0269  | up         | MI-P-A2-ae-y-d-11-1-UM.s1 MI-P-A2 Sus scrofa cDNA clone MI-P-A2-ae-y-d-11-1-UM 3', mRNA sequence                                         |
| A_72_P104946 |                      | 2,8184      | 0,0456  | up         | Pig DNA sequence from clone XX-BE284E13 on chromosome 11, complete sequence                                                              |
| A_72_P271794 |                      | 2,7767      | 0,0375  | up         | AJ683600 CSEQRAN04 Sus scrofa cDNA clone C0001802_I21, mRNA                                                                              |
| A_72_P324303 |                      | 2,6549      | 0,0373  | up         | AJ957011 KN404_2 Sus scrofa cDNA clone C0007750m18 3', mRNA                                                                              |
| A_72_P373223 | EEA1                 | 2,6245      | 0,0409  | up         | Sus scrofa early endosome antigen 1 (EEA1), mRNA                                                                                         |
| A_72_P320608 |                      | 2,5613      | 0,0348  | up         | 1103584 MARC 4PIG Sus scrofa cDNA 5', mRNA sequence                                                                                      |
| A_72_P111001 |                      | 2,5387      | 0,0129  | up         | UMC-p6mm3-008-b02 6mm ovarian follicle p6mm Sus scrofa cDNA 3', mRNA sequence                                                            |
| A_72_P338613 |                      | 2,5273      | 0,0453  | up         | 346982 MARC 1PIG Sus scrofa cDNA 5', mRNA sequence                                                                                       |
| A_72_P005621 |                      | 2,5069      | 0,0376  | up         | 1000485 MARC 4PIG Sus scrofa cDNA 3', mRNA sequence                                                                                      |
| A_72_P081726 |                      | 2,4986      | 0,0402  | up         | Sus scrofa mRNA, clone: UTR010040A09, expressed in uterus                                                                                |
| A_72_P159361 |                      | 2,4869      | 0,0473  | up         | Rep: DSPP600 - Sus scrofa (Pig), partial (3%) [TC572246]                                                                                 |
| A_72_P218717 |                      | 2,4406      | 0,0208  | up         | Rnca19b_m21.y1 nca Sus scrofa cDNA 5', mRNA sequence                                                                                     |
| A_72_P415663 |                      | 2,4166      | 0,0295  | up         | Pig DNA sequence from clone XX-BE284E13 on chromosome 11, complete sequence                                                              |
| A_72_P279359 |                      | 2,4045      | 0,0309  | up         | AJ659296 KN277 Sus scrofa cDNA clone C0005216_M17, mRNA sequence                                                                         |
| A_72_P099131 |                      | 2,3998      | 0,0343  | up         | AJ964668 KN404_2 Sus scrofa cDNA clone C0007758n19 5', mRNA sequence                                                                     |
| A_72_P267581 | LOC100516932         | 2,3904      | 0,0321  | up         | Sus scrofa keratin-associated protein 4-12-like (LOC100516932), mRNA                                                                     |
| A_72_P316698 | LOC100626841         | 2,3579      | 0,0487  | up         | Sus scrofa uncharacterized LOC100626841 (LOC100626841), transcript                                                                       |
| A_72_P162201 |                      | 2,3578      | 0,0275  | up         | Pig DNA sequence from clone CH242-145J20 on chromosome X, complete sequence                                                              |
| A_72_P723538 |                      | 2,3433      | 0,0439  | up         | Sus scrofa mRNA, clone:LVR010051G01, expressed in liver                                                                                  |
| A_72_P116056 | HECTD1               | 2,3426      | 0,0269  | up         | Sus scrofa HECT domain containing E3 ubiquitin protein ligase 1 (HECTD1), mRNA                                                           |
| A_72_P414873 | DHX36                | 2,3378      | 0,0491  | up         | Sus scrofa DEAH (Asp-Glu-Ala-His) box polypeptide 36 (DHX36), mRNA                                                                       |
| A_72_P269579 |                      | 2,3304      | 0,0355  | up         | AJ604906 Sus scrofa skeletal muscle, biceps femoris adult Sus scrofa cDNA clone 10B12F17, mRNA sequence                                  |
| A_72_P006561 |                      | 2,2975      | 0,0146  | up         | 1541517 MARC 3PIG Sus scrofa cDNA 3', mRNA sequence                                                                                      |
| A_72_P304669 |                      | 2,2909      | 0,0408  | up         | AJ959173 KN404_2 Sus scrofa cDNA clone C0007752b12 3', mRNA sequence                                                                     |
| A_72_P132286 |                      | 2,2758      | 0,0461  | up         | 1116614 MARC 4PIG Sus scrofa cDNA 3', mRNA sequence                                                                                      |
| A_72_P371598 |                      | 2,2683      | 0,0259  | up         | AJ960829 KN404_2 Sus scrofa cDNA clone C0007755p17 5', mRNA                                                                              |
| A_72_P407148 |                      | 2,2667      | 0,0346  | up         | Pig DNA sequence from clone CH242-344D21 on chromosome 4, complete sequence                                                              |
| A_72_P065806 |                      | 2,2623      | 0,0127  | up         | UMC-pcrybst1-012-e10 Blastocyst after cryopreservation pcrybst Sus scrofa cDNA 3', mRNA sequence                                         |
| A_72_P372433 |                      | 2,2276      | 0,0238  | up         | MI-P-CP0-nvs-e-12-0-UI.s1 MI-P-CP0 Sus scrofa cDNA clone MI-P-CP0-nvs-e-12-0-UI 3', mRNA sequence                                        |
| A_72_P183056 |                      | 2,2176      | 0,0004  | up         | rrret07_b23.y1 ret Sus scrofa cDNA 5', mRNA sequence                                                                                     |
| A_72_P398673 |                      | 2,2153      | 0,0376  | up         | Pig DNA sequence from clone CH242-253A6 on chromosome X, complete sequence                                                               |
| A_72_P338428 |                      | 2,2067      | 0,0399  | up         | BP155763 full-length enriched swine cDNA library, adult peripheral blood lymphocyte Sus scrofa cDNA clone PBL010002D09 5', mRNA sequence |
| A_72_P031491 |                      | 2,1988      | 0,0048  | up         | AJ686753 CSEQRAN04 Sus scrofa cDNA clone C0001812_L22, mRNA sequence                                                                     |
| A_72_P378973 |                      | 2,1946      | 0,0320  | up         | 1527088 MARC 3PIG Sus scrofa cDNA 3', mRNA sequence                                                                                      |
| A_72_P174606 |                      | 2,1869      | 0,0212  | up         | BP153436 full-length enriched swine cDNA library, adult ovary Sus scrofa cDNA clone OVRM10137G10 5', mRNA sequence                       |
| A_72_P386458 |                      | 2,1865      | 0,0167  | up         | CJ029091 full-length enriched swine cDNA library, adult trachea Sus scrofa cDNA clone TCH01F100091 5', mRNA sequence                     |
| A_72_P289424 |                      | 2,1765      | 0,0169  | up         | DB803436 full-length enriched swine cDNA library, adult skin Sus scrofa cDNA clone SKNB10057H02 5', mRNA sequence                        |
| A_72_P489896 | HELLS                | 2,1745      | 0,0461  | up         | Sus scrofa helicase, lymphoid-specific (HELLS), mRNA                                                                                     |
| A_72_P015821 |                      | 2,1720      | 0,0400  | up         | AJ681382 CSEQRAN04 Sus scrofa cDNA clone C0001795_P06, mRNA                                                                              |
| A_72_P014726 | ACACA                | 2,1463      | 0,0349  | up         | Sus scrofa clone CH242-27L18 acetyl-coenzyme A carboxylase alpha (ACACA) gene, complete cds                                              |
| A_72_P286604 |                      | 2,1394      | 0,0340  | up         | Sus scrofa mRNA, clone:OVRM10063H09, expressed in ovary                                                                                  |
| A_72_P148551 |                      | 2,1363      | 0,0161  | up         | BP170869 full-length enriched swine cDNA library, adult uterus Sus scrofa cDNA clone UTR010004C11 5', mRNA sequence                      |
| A_72_P382663 |                      | 2,1342      | 0,0074  | up         | 1545338 MARC 3PIG Sus scrofa cDNA 5', mRNA sequence                                                                                      |
| A_72_P417804 |                      | 2,1333      | 0,0388  | up         | 1496210 MARC 3PIG Sus scrofa cDNA 3', mRNA sequence                                                                                      |
| A_72_P034516 |                      | 2,1270      | 0,0176  | up         | Pig DNA sequence from clone CH242-404E7 on chromosome 7, complete                                                                        |
| A_72_P289919 |                      | 2,1085      | 0,0023  | up         | Sus scrofa mRNA, clone:ADR010096H12, expressed in adrenal gland                                                                          |
| A_72_P706082 | LOC100739480         | 2,1004      | 0,0497  | up         | Sus scrofa zinc finger protein with KRAB and SCAN domains 7-like (LOC100739480), mRNA                                                    |
| A_72_P773793 |                      | 2,0966      | 0,0296  | up         | Sus scrofa BAC clone KNP_1798G2                                                                                                          |
| A_72_P305719 | FGF7                 | 2,0775      | 0,0007  | up         | Sus scrofa domestica fibroblast growth factor (FGF7) gene, partial cds                                                                   |
| A_72_P273784 |                      | 2,0771      | 0,0475  | up         | 1535916 MARC 3PIG Sus scrofa cDNA 5', mRNA sequence                                                                                      |
| A_72_P214197 |                      | 2,0559      | 0,0403  | up         | 893457 MARC 4PIG Sus scrofa cDNA 5', mRNA sequence                                                                                       |
| A_72_P116011 |                      | 2,0528      | 0,0471  | up         | AJ958155 KN404_2 Sus scrofa cDNA clone C0007753e15 5', mRNA sequence                                                                     |
| A_72_P390363 |                      | 2,0230      | 0,0151  | up         | BP448011 full-length enriched swine cDNA library, adult liver Sus scrofa cDNA clone LVR010030H11 5', mRNA sequence                       |
| A_72_P066786 |                      | 2,0227      | 0,0141  | up         | CJ030293 full-length enriched swine cDNA library, adult testis Sus scrofa cDNA clone TES01A070005 5', mRNA sequence                      |
| A_72_P309553 |                      | 2,0151      | 0,0453  | up         | AJ954378 KN404_1 Sus scrofa cDNA clone C0007747o12 5', mRNA sequence                                                                     |

|              |              |        |        |    |                                                                                                                                                                            |
|--------------|--------------|--------|--------|----|----------------------------------------------------------------------------------------------------------------------------------------------------------------------------|
| A_72_P317763 | MUC4         | 2,0067 | 0,0495 | up | Sus scrofa mucin 4, cell surface associated (MUC4), mRNA                                                                                                                   |
| A_72_P241982 |              | 1,9996 | 0,0158 | up | AJ962209 KN404_2 Sus scrofa cDNA clone C0007748e09 5', mRNA                                                                                                                |
| A_72_P239107 |              | 1,9977 | 0,0476 | up | Sus scrofa contig sequence, clone KNP_240H2_Contig7                                                                                                                        |
| A_72_P128521 |              | 1,9868 | 0,0327 | up | Pig DNA sequence from clone CH242-35J8 on chromosome 7, complete                                                                                                           |
| A_72_P177001 |              | 1,9856 | 0,0413 | up | Sus scrofa mRNA, clone:LNG010023A05, expressed in lung                                                                                                                     |
| A_72_P293279 | SMC2         | 1,9723 | 0,0085 | up | Sus scrofa structural maintenance of chromosomes 2 (SMC2), mRNA                                                                                                            |
| A_72_P285084 |              | 1,9682 | 0,0388 | up | 1139826 MARC 4PIG Sus scrofa cDNA 3', mRNA sequence                                                                                                                        |
| A_72_P125231 |              | 1,9662 | 0,0241 | up | 370839 MARC 2PIG Sus scrofa cDNA 5', mRNA sequence                                                                                                                         |
| A_72_P362148 |              | 1,9605 | 0,0117 | up | Pig DNA sequence from clone CH242-195A3 on chromosome 14, complete sequence                                                                                                |
| A_72_P694466 | SLC10A5      | 1,9588 | 0,0222 | up | Sus scrofa solute carrier family 10, member 5 (SLC10A5), mRNA                                                                                                              |
| A_72_P400423 |              | 1,9534 | 0,0463 | up | 1571693 MARC 3PIG Sus scrofa cDNA 3', mRNA sequence                                                                                                                        |
| A_72_P368353 |              | 1,9463 | 0,0135 | up | 949737 MARC 4PIG Sus scrofa cDNA 3', mRNA sequence                                                                                                                         |
| A_72_P330213 |              | 1,9395 | 0,0414 | up | BW972589 full-length enriched swine cDNA library, adult peripheral blood mononuclear cell Sus scrofa cDNA clone PBL010072F08 5', mRNA sequence                             |
| A_72_P299614 |              | 1,9365 | 0,0448 | up | PDUTs1077E10 Porcine testis cDNA library I Sus scrofa cDNA clone PDUTs1077E10 5' similar to homologue to emb[X64127.1] S.scrofa DNA for SINE sequence SSPRE, mRNA sequence |
| A_72_P322838 |              | 1,9355 | 0,0267 | up | Sus scrofa mRNA, clone:OVRM10106F11, expressed in ovary                                                                                                                    |
| A_72_P265212 |              | 1,9311 | 0,0212 | up | 1572528 MARC 3PIG Sus scrofa cDNA 3', mRNA sequence                                                                                                                        |
| A_72_P082996 |              | 1,9283 | 0,0328 | up | rret19_h20.y1 ret Sus scrofa cDNA 5', mRNA sequence                                                                                                                        |
| A_72_P153351 |              | 1,9279 | 0,0240 | up | UNL-P-FN-bo-h-07-0-UNL.s1 UNL-P-FN Sus scrofa cDNA clone UNL-P-FN-                                                                                                         |
| A_72_P155186 |              | 1,9261 | 0,0272 | up | CJ010054 full-length enriched swine cDNA library, adult mesenteric lymph                                                                                                   |
| A_72_P047056 |              | 1,9249 | 0,0124 | up | AJ958139 KN404_2 Sus scrofa cDNA clone C0007760h04 5', mRNA                                                                                                                |
| A_72_P083691 | LOC100519726 | 1,9105 | 0,0374 | up | Sus scrofa uncharacterized LOC100519726 (LOC100519726), misc_RNA                                                                                                           |
| A_72_P099066 |              | 1,9092 | 0,0362 | up | AJ964783 KN404_2 Sus scrofa cDNA clone C0007754a13 5', mRNA sequence                                                                                                       |
| A_72_P182821 |              | 1,9052 | 0,0008 | up | rpgl01_f3.y1 pgl Sus scrofa cDNA 5', mRNA sequence                                                                                                                         |
| A_72_P167956 |              | 1,9017 | 0,0274 | up | 43860 MARC 2PIG Sus scrofa cDNA 5', mRNA sequence                                                                                                                          |
| A_72_P162191 |              | 1,9005 | 0,0461 | up | AJ959837 KN404_2 Sus scrofa cDNA clone C0007749m12 5', mRNA sequence                                                                                                       |
| A_72_P379393 |              | 1,8983 | 0,0385 | up | 365252 MARC 2PIG Sus scrofa cDNA 5', mRNA sequence                                                                                                                         |
| A_72_P022576 |              | 1,8973 | 0,0009 | up | 953025 MARC 4PIG Sus scrofa cDNA 3', mRNA sequence                                                                                                                         |
| A_72_P105391 |              | 1,8971 | 0,0274 | up | Sus scrofa mRNA, clone: LVRM10150H08, expressed in liver                                                                                                                   |
| A_72_P103866 |              | 1,8720 | 0,0198 | up | 857804 MARC 3PIG Sus scrofa cDNA 5', mRNA sequence                                                                                                                         |
| A_72_P380558 |              | 1,8693 | 0,0183 | up | 944344 MARC 4PIG Sus scrofa cDNA 5', mRNA sequence                                                                                                                         |
| A_72_P423289 |              | 1,8641 | 0,0344 | up | 129880 MARC 1PIG Sus scrofa cDNA 5', mRNA sequence                                                                                                                         |
| A_72_P117971 |              | 1,8638 | 0,0303 | up | rjej34b_p3.y1 jej Sus scrofa cDNA 5', mRNA sequence                                                                                                                        |
| A_72_P214712 |              | 1,8631 | 0,0448 | up | AJ943845 CSEQRAN17 Sus scrofa cDNA clone C0007319n08 5', mRNA sequence                                                                                                     |
| A_72_P216672 | MEP1B        | 1,8587 | 0,0463 | up | Sus scrofa meprin A, beta (MEP1B), mRNA                                                                                                                                    |
| A_72_P083261 |              | 1,8585 | 0,0268 | up | 110742 MARC 1PIG Sus scrofa cDNA 5', mRNA sequence                                                                                                                         |
| A_72_P403888 |              | 1,8521 | 0,0355 | up | AJ959081 KN404_2 Sus scrofa cDNA clone C0007748d07 3', mRNA sequence                                                                                                       |
| A_72_P329343 | CCDC99       | 1,8518 | 0,0272 | up | Sus scrofa spindle apparatus coiled-coil protein 1 (CCDC99), mRNA                                                                                                          |
| A_72_P088431 | DIRAS3       | 1,8438 | 0,0129 | up | Sus scrofa DIRAS family, GTP-binding RAS-like 3 (DIRAS3), mRNA                                                                                                             |
| A_72_P411118 |              | 1,8434 | 0,0214 | up | Sus scrofa mRNA, clone: MLTL10048G04, expressed in longissimus muscle                                                                                                      |
| A_72_P280994 |              | 1,8409 | 0,0219 | up | Sus scrofa mRNA, clone:OVR010041D02, expressed in ovary                                                                                                                    |
| A_72_P027051 |              | 1,8405 | 0,0055 | up | 1123279 MARC 4PIG Sus scrofa cDNA 3', mRNA sequence                                                                                                                        |
| A_72_P219732 |              | 1,8401 | 0,0281 | up | Pig DNA sequence from clone CH242-467E16 on chromosome 4, complete sequence                                                                                                |
| A_72_P316953 |              | 1,8381 | 0,0113 | up | Sus scrofa mRNA, clone:TCH010047E01, expressed in trachea                                                                                                                  |
| A_72_P035226 |              | 1,8317 | 0,0465 | up | Sus scrofa mRNA, clone:OVR010018F09, expressed in ovary                                                                                                                    |
| A_72_P301609 |              | 1,8298 | 0,0457 | up | 1100700 MARC 4PIG Sus scrofa cDNA 3', mRNA sequence                                                                                                                        |
| A_72_P267901 |              | 1,8272 | 0,0263 | up | Sus scrofa mRNA, clone: DCI010062B03, expressed in dendritic cells (immature)                                                                                              |
| A_72_P091006 |              | 1,8255 | 0,0272 | up | CMD48_G12_88 UMNMPM3 Sus scrofa cDNA clone PPSUBLIB_33G12 5', mRNA sequence                                                                                                |
| A_72_P309868 |              | 1,8135 | 0,0475 | up | Sus scrofa mRNA, clone:SKNB10097G04, expressed in skin                                                                                                                     |
| A_72_P294399 |              | 1,8083 | 0,0094 | up | Sus scrofa mRNA, clone: OVRT10073F12, expressed in ovary                                                                                                                   |
| A_72_P340623 | SNED1        | 1,8065 | 0,0360 | up | PREDICTED: Sus scrofa sushi, nidogen and EGF-like domains 1 (SNED1), transcript variant X1, mRNA                                                                           |
| A_72_P090881 |              | 1,8007 | 0,0428 | up | Sus scrofa mRNA, clone:LVRM10154G06, expressed in liver                                                                                                                    |
| A_72_P056971 | LOC100739021 | 1,7920 | 0,0005 | up | Sus scrofa PC-esterase domain-containing protein 1B-like (LOC100739021), misc_RNA                                                                                          |
| A_72_P412828 |              | 1,7873 | 0,0322 | up | adipo-223 Porcine adipogenesis cDNA library Sus scrofa cDNA, mRNA sequence                                                                                                 |
| A_72_P584121 | NOP58        | 1,7869 | 0,0264 | up | Sus scrofa NOP58 ribonucleoprotein (NOP58), mRNA                                                                                                                           |
| A_72_P471611 | PPIG         | 1,7700 | 0,0155 | up | Sus scrofa peptidylprolyl isomerase G (cyclophilin G) (PPIG), mRNA                                                                                                         |
| A_72_P426779 |              | 1,7634 | 0,0324 | up | AJ962205 KN404_2 Sus scrofa cDNA clone C0007750j18 5', mRNA sequence                                                                                                       |
| A_72_P145501 |              | 1,7628 | 0,0065 | up | 1533095 MARC 3PIG Sus scrofa cDNA 5', mRNA sequence                                                                                                                        |
| A_72_P305439 |              | 1,7585 | 0,0316 | up | 1149764 MARC 4PIG Sus scrofa cDNA 3', mRNA sequence                                                                                                                        |
| A_72_P366598 |              | 1,7569 | 0,0246 | up | CJ025828 full-length enriched swine cDNA library, adult trachea Sus scrofa cDNA clone TCH01H010045 5', mRNA sequence                                                       |
| A_72_P057326 |              | 1,7551 | 0,0319 | up | MI-P-CP1-nzc-o-07-0-UI.s1 MI-P-CP1 Sus scrofa cDNA clone MI-P-CP1-nzc-o-07-0-UI 3', mRNA sequence                                                                          |
| A_72_P190976 |              | 1,7534 | 0,0373 | up | CJ024501 full-length enriched swine cDNA library, adult trachea Sus scrofa cDNA clone TCH01C050028 5', mRNA sequence                                                       |
| A_72_P363403 |              | 1,7481 | 0,0214 | up | 866514 MARC 4PIG Sus scrofa cDNA 3', mRNA sequence                                                                                                                         |
| A_72_P329348 |              | 1,7399 | 0,0490 | up | BX917575 Sus Scrofa library (scan) Sus scrofa cDNA clone scan0035.b.12 5prim, mRNA sequence                                                                                |
| A_72_P309068 |              | 1,7382 | 0,0435 | up | BX914361 Sus Scrofa library (scan) Sus scrofa cDNA clone scan0001.o.15 5prim, mRNA sequence                                                                                |
| A_72_P193392 |              | 1,7381 | 0,0375 | up | AJ652903 KN277 Sus scrofa cDNA clone C0005182_D17, mRNA sequence                                                                                                           |
| A_72_P301349 | PARBPB       | 1,7342 | 0,0206 | up | Sus scrofa PARP1 binding protein (PARBPB), partial mRNA                                                                                                                    |
| A_72_P404513 |              | 1,7267 | 0,0486 | up | 904399 MARC 4PIG Sus scrofa cDNA 5', mRNA sequence                                                                                                                         |
| A_72_P375123 |              | 1,7196 | 0,0230 | up | Pig DNA sequence from clone CH242-12K2 on chromosome 2, complete sequence                                                                                                  |
| A_72_P078786 |              | 1,7177 | 0,0297 | up | AJ954368 KN404_1 Sus scrofa cDNA clone C0007735i05 5', mRNA sequence                                                                                                       |
| A_72_P374903 |              | 1,7166 | 0,0026 | up | DB787348 full-length enriched swine cDNA library, adult adrenal gland Sus scrofa cDNA clone ADR010066B08 5', mRNA sequence                                                 |

|              |              |        |        |    |                                                                                                                                    |
|--------------|--------------|--------|--------|----|------------------------------------------------------------------------------------------------------------------------------------|
| A_72_P101066 |              | 1,7152 | 0,0281 | up | rnca28b_i3.y1 nca Sus scrofa cDNA 5', mRNA sequence                                                                                |
| A_72_P167521 |              | 1,7128 | 0,0228 | up | UMC-pd6end2-008-d07 Endometrium gilt D6 of estrous cycle pd6end Sus scrofa cDNA 3', mRNA sequence                                  |
| A_72_P366798 |              | 1,7127 | 0,0277 | up | AJ687157 CSEQRAN04 Sus scrofa cDNA clone C0001813_N17, mRNA sequence                                                               |
| A_72_P113191 |              | 1,7119 | 0,0410 | up |                                                                                                                                    |
| A_72_P320418 |              | 1,7101 | 0,0352 | up | BP149557 full-length enriched swine cDNA library, adult ovary Sus scrofa cDNA clone OVRM10097D09 5', mRNA sequence                 |
| A_72_P073376 | BCL9         | 1,7082 | 0,0495 | up | Sus scrofa B-cell CLL/lymphoma 9 (BCL9), mRNA                                                                                      |
| A_72_P221462 |              | 1,7033 | 0,0078 | up | BW983903 full-length enriched swine cDNA library, adult intestine Sus scrofa cDNA clone ITT010089D09 5', mRNA sequence             |
| A_72_P307413 |              | 1,6991 | 0,0467 | up | Sus scrofa mRNA, clone:SKNB10050H04, expressed in skin                                                                             |
| A_72_P555216 | MPHOSPH10    | 1,6978 | 0,0313 | up | Sus scrofa M-phase phosphoprotein 10 (U3 small nucleolar ribonucleoprotein) (MPHOSPH10), mRNA                                      |
| A_72_P016536 |              | 1,6966 | 0,0419 | up | 1143188 MARC 4PIG Sus scrofa cDNA 3', mRNA sequence                                                                                |
| A_72_P167716 |              | 1,6966 | 0,0450 | up | UMC-pd6end1-008-e09 Endometrium gilt D6 of estrous cycle pd6end Sus scrofa cDNA 3', mRNA sequence                                  |
| A_72_P187171 | SLC37A2      | 1,6918 | 0,0458 | up | Sus scrofa solute carrier family 37 (glucose-6-phosphate transporter), member 2 (SLC37A2), mRNA                                    |
| A_72_P250707 |              | 1,6870 | 0,0332 | up | Pig DNA sequence from clone CH242-97B16 on chromosome 8, complete sequence                                                         |
| A_72_P069486 |              | 1,6853 | 0,0433 | up | Sus scrofa mRNA, clone: KDN010054G03, expressed in kidney                                                                          |
| A_72_P441434 | TGFA         | 1,6835 | 0,0185 | up | Sus scrofa transforming growth factor, alpha (TGFA), mRNA                                                                          |
| A_72_P246442 |              | 1,6826 | 0,0454 | up | Sus scrofa ataxia-telangiectasia mutated protein gene, exons 1 through 64 and complete cds                                         |
| A_72_P227172 |              | 1,6824 | 0,0376 | up | AJ669039 CSEQRAN09 Sus scrofa cDNA clone C0000048_L08, mRNA sequence                                                               |
| A_72_P279074 |              | 1,6806 | 0,0406 | up | rhy01c_m24.y1 hyp Sus scrofa cDNA 5', mRNA sequence                                                                                |
| A_72_P395818 |              | 1,6779 | 0,0214 | up | 1571911 MARC 3PIG Sus scrofa cDNA 3', mRNA sequence                                                                                |
| A_72_P389178 |              | 1,6754 | 0,0221 | up | 1144288 MARC 4PIG Sus scrofa cDNA 3', mRNA sequence                                                                                |
| A_72_P436879 |              | 1,6744 | 0,0475 | up | AJ959932 KN404_2 Sus scrofa cDNA clone C0007752b10 3', mRNA sequence                                                               |
| A_72_P426064 |              | 1,6734 | 0,0468 | up | BX918411 Sus Scrofa library (scan) Sus scrofa cDNA clone scan0038.i.08 5prim, mRNA sequence                                        |
| A_72_P380223 |              | 1,6731 | 0,0280 | up | UMC-pfeto1-013-a06 Fetal ovary pfeto Sus scrofa cDNA 3', mRNA sequence                                                             |
| A_72_P369458 |              | 1,6720 | 0,0446 | up | UMC-p6mm2-002-a01 6mm ovarian follicle p6mm Sus scrofa cDNA 3', mRNA sequence                                                      |
| A_72_P443016 | CCT6A        | 1,6703 | 0,0229 | up | Sus scrofa chaperonin containing TCP1, subunit 6A (zeta 1) (CCT6A), mRNA                                                           |
| A_72_P099426 |              | 1,6656 | 0,0186 | up | AJ964241 KN404_2 Sus scrofa cDNA clone C0007754e02 5', mRNA sequence                                                               |
| A_72_P521584 |              | 1,6628 | 0,0159 | up | EST-AR111H04 Infected Porcine Spleen cDNA library Sus scrofa cDNA clone AR111H04, mRNA sequence                                    |
| A_72_P186811 | SGSM1        | 1,6613 | 0,0014 | up | Sus scrofa small G protein signaling modulator 1 (SGSM1), mRNA                                                                     |
| A_72_P616219 | DLD          | 1,6597 | 0,0304 | up | Sus scrofa dihydrolipoamide dehydrogenase (DLD), mRNA                                                                              |
| A_72_P054756 |              | 1,6597 | 0,0252 | up | Select seq gb CV101857.1                                                                                                           |
| A_72_P321353 | CHD2         | 1,6569 | 0,0084 | up | Sus scrofa chromodomain helicase DNA binding protein 2 (CHD2), mRNA                                                                |
| A_72_P666425 | HSPD1        | 1,6552 | 0,0032 | up | Sus scrofa heat shock 60kDa protein 1 (chaperonin) (HSPD1), mRNA                                                                   |
| A_72_P297029 | MBOAT1       | 1,6534 | 0,0452 | up | Sus scrofa membrane bound O-acyltransferase domain containing 1 (MBOAT1), mRNA                                                     |
| A_72_P268639 | CEP68        | 1,6500 | 0,0463 | up | Sus scrofa centrosomal protein 68kDa (CEP68), mRNA                                                                                 |
| A_72_P231457 |              | 1,6493 | 0,0258 | up | CJ024558 full-length enriched swine cDNA library, adult trachea Sus scrofa cDNA clone TCH01A110029 5', mRNA sequence               |
| A_72_P665246 |              | 1,6475 | 0,0067 | up | Sus scrofa mRNA, clone:AMP010012A11, expressed in alveolar macrophage                                                              |
| A_72_P442176 |              | 1,6472 | 0,0229 | up | Sus scrofa domestica mitochondrial DNA, complete genome                                                                            |
| A_72_P379763 |              | 1,6469 | 0,0332 | up | 937362 MARC 4PIG Sus scrofa cDNA 3', mRNA sequence                                                                                 |
| A_72_P309623 |              | 1,6466 | 0,0193 | up | Sus scrofa mRNA, clone:SKNB10045G09, expressed in skin                                                                             |
| A_72_P258692 |              | 1,6454 | 0,0291 | up | 46042 MARC 2PIG Sus scrofa cDNA 5', mRNA sequence                                                                                  |
| A_72_P212877 |              | 1,6451 | 0,0372 | up | rp11179 Normalized porcine adipose tissues cDNA library Sus scrofa cDNA, mRNA sequence                                             |
| A_72_P349653 | CRYBB3       | 1,6440 | 0,0491 | up | Sus scrofa crystallin, beta B3 (CRYBB3), mRNA                                                                                      |
| A_72_P283189 |              | 1,6439 | 0,0367 | up | 904556 MARC 4PIG Sus scrofa cDNA 5', mRNA sequence                                                                                 |
| A_72_P760603 | ATM          | 1,6426 | 0,0268 | up | Sus scrofa ataxia telangiectasia mutated (ATM), mRNA                                                                               |
| A_72_P310108 |              | 1,6415 | 0,0132 | up | 886329 MARC 4PIG Sus scrofa cDNA 3', mRNA sequence                                                                                 |
| A_72_P090681 |              | 1,6409 | 0,0192 | up | BW978330 full-length enriched swine cDNA library, adult intestine Sus scrofa cDNA clone ITT010026B11 5', mRNA sequence             |
| A_72_P095956 |              | 1,6394 | 0,0385 | up | rgu0118_o6.y1 gul Sus scrofa cDNA 5', mRNA sequence                                                                                |
| A_72_P280314 | ANKRD50      | 1,6392 | 0,0165 | up | PREDICTED: Sus scrofa ankyrin repeat domain 50 (ANKRD50), mRNA                                                                     |
| A_72_P306079 |              | 1,6373 | 0,0326 | up | Sus scrofa mRNA, clone:LVRM10174E09, expressed in liver                                                                            |
| A_72_P223093 |              | 1,6361 | 0,0409 | up | Pig DNA sequence from clone CH242-194K16 on chromosome X, complete sequence                                                        |
| A_72_P295819 |              | 1,6360 | 0,0381 | up | 1527065 MARC 3PIG Sus scrofa cDNA 3', mRNA sequence                                                                                |
| A_72_P156836 |              | 1,6359 | 0,0471 | up | AJ938613 CSEQRAN17 Sus scrofa cDNA clone C0007318g05 3', mRNA sequence                                                             |
| A_72_P273094 |              | 1,6344 | 0,0280 | up | AJ941555 CSEQRAN17 Sus scrofa cDNA clone C0007319d12 3', mRNA sequence                                                             |
| A_72_P003726 |              | 1,6323 | 0,0429 | up | 1115068 MARC 4PIG Sus scrofa cDNA 3', mRNA sequence                                                                                |
| A_72_P120251 |              | 1,6305 | 0,0372 | up | Sus scrofa clone Clu_28644.scr.msk.p1.Contig1, mRNA sequence                                                                       |
| A_72_P104551 |              | 1,6254 | 0,0150 | up | FS681524 full-length enriched swine cDNA library, adult longissimus Sus scrofa cDNA clone MLTL10036C10 5', mRNA sequence           |
| A_72_P251257 |              | 1,6230 | 0,0244 | up | AR031C10LN05EE02S Porcine Lymph node cDNA library, Cot 5 Sus scrofa cDNA, mRNA sequence                                            |
| A_72_P052696 |              | 1,6181 | 0,0016 | up | Sus scrofa mRNA, clone:MLN010086G12, expressed in mesenteric lymph nodes                                                           |
| A_72_P378758 |              | 1,6157 | 0,0064 | up | UMC-pblivv1-003-h11 Blastocyst-(invivo) pblivv Sus scrofa cDNA 3', mRNA sequence                                                   |
| A_72_P248327 |              | 1,6147 | 0,0451 | up | CJ007980 full-length enriched swine cDNA library, adult mesenteric lymph node Sus scrofa cDNA clone MLN01C090004 5', mRNA sequence |
| A_72_P349398 | ATL2         | 1,6143 | 0,0242 | up | Sus scrofa atlastin GTPase 2 (ATL2), mRNA                                                                                          |
| A_72_P219767 |              | 1,6132 | 0,0477 | up | 944285 MARC 4PIG Sus scrofa cDNA 5', mRNA sequence                                                                                 |
| A_72_P147736 | LEO1         | 1,6131 | 0,0299 | up | Sus scrofa Leo1, Paf1/RNA polymerase II complex component, homolog (S. cerevisiae) (LEO1), mRNA                                    |
| A_72_P509075 | LOC100525988 | 1,6115 | 0,0075 | up | Sus scrofa aspartyl/asparaginyl beta-hydroxylase-like (LOC100525988), mRNA                                                         |
| A_72_P347933 |              | 1,6090 | 0,0373 | up | Sus scrofa mRNA, clone:TCH010062H06, expressed in trachea                                                                          |
| A_72_P013686 | TRPV2        | 1,6047 | 0,0077 | up | Sus scrofa transient receptor potential cation channel, subfamily V, member 2 (TRPV2), mRNA                                        |
| A_72_P186731 |              | 1,6042 | 0,0003 | up | Select seq gb EW340903.2                                                                                                           |

|              |              |        |        |    |                                                                                                                                          |
|--------------|--------------|--------|--------|----|------------------------------------------------------------------------------------------------------------------------------------------|
| A_72_P205117 |              | 1,6028 | 0,0273 | up | Sus scrofa mRNA, clone:OVRM10074F04, expressed in ovary.                                                                                 |
| A_72_P190801 | CCDC91       | 1,6019 | 0,0035 | up | Sus scrofa coiled-coil domain containing 91 (CCDC91), mRNA                                                                               |
| A_72_P006091 | PLA2G4A      | 1,6015 | 0,0172 | up | Sus scrofa phospholipase A2, group IVA (cytosolic, calcium-dependent) (PLA2G4A), mRNA                                                    |
| A_72_P269194 |              | 1,6006 | 0,0014 | up | rplac_11608.y1 pla Sus scrofa cDNA 5', mRNA sequence                                                                                     |
| A_72_P189856 | NEO1         | 1,6005 | 0,0364 | up | Sus scrofa neogenin 1 (NEO1), partial mRNA                                                                                               |
| A_72_P732228 |              | 1,5994 | 0,0171 | up | Sus scrofa mitochondrion, complete genome                                                                                                |
| A_72_P308473 |              | 1,5981 | 0,0249 | up | AJ955916 KN404_2 Sus scrofa cDNA clone C0007760m04 3', mRNA sequence                                                                     |
| A_72_P118151 |              | 1,5977 | 0,0211 | up | 244810 MARC 2PIG Sus scrofa cDNA 5', mRNA sequence                                                                                       |
| A_72_P608427 |              | 1,5952 | 0,0059 | up | Sus scrofa mRNA, clone:AMP010012A11, expressed in alveolar macrophage                                                                    |
| A_72_P348868 |              | 1,5906 | 0,0221 | up | UNL-P-FN-bo-f-05-0-UNL.s1 UNL-P-FN Sus scrofa cDNA clone UNL-P-FN-bo-f-05-0-UNL 3', mRNA sequence                                        |
| A_72_P065641 |              | 1,5888 | 0,0027 | up | Pig DNA sequence from clone CH242-28F9 on chromosome 7, complete sequence                                                                |
| A_72_P519181 | LOC100738992 | 1,5859 | 0,0408 | up | Sus scrofa zinc finger transcription factor Trps1-like (LOC100738992), mRNA                                                              |
| A_72_P309683 |              | 1,5850 | 0,0345 | up | BP146922 full-length enriched swine cDNA library, adult ovary Sus scrofa cDNA clone OVRM10081B08 5', mRNA sequence                       |
| A_72_P611693 |              | 1,5846 | 0,0090 | up | Sus scrofa mRNA, clone:AMP010012A11, expressed in alveolar macrophage                                                                    |
| A_72_P261027 |              | 1,5836 | 0,0229 | up | Sus scrofa mRNA, clone:AMP010012A11, expressed in alveolar macrophage                                                                    |
| A_72_P719508 |              | 1,5817 | 0,0226 | up | Sus scrofa mitochondrion, complete genome                                                                                                |
| A_72_P361018 |              | 1,5811 | 0,0040 | up | 998248 MARC 4PIG Sus scrofa cDNA 3', mRNA sequence                                                                                       |
| A_72_P384273 |              | 1,5805 | 0,0190 | up | AJ667988 CSEQRAN09 Sus scrofa cDNA clone C0000044_C01, mRNA sequence                                                                     |
| A_72_P088506 | RYR1         | 1,5804 | 0,0095 | up | Sus scrofa ryanodine receptor 1 (skeletal) (RYR1), mRNA                                                                                  |
| A_72_P023781 | LOC100524682 | 1,5790 | 0,0300 | up | Sus scrofa leukocyte receptor cluster member 8 homolog (LOC100524682), mRNA                                                              |
| A_72_P724458 |              | 1,5733 | 0,0225 | up | Sus scrofa mitochondrion, complete genome                                                                                                |
| A_72_P431379 |              | 1,5726 | 0,0346 | up | 1513985 MARC 3PIG Sus scrofa cDNA 3', mRNA sequence                                                                                      |
| A_72_P332538 |              | 1,5712 | 0,0186 | up | Sus scrofa mRNA, clone:ITT010037H11, expressed in small intestine                                                                        |
| A_72_P058141 |              | 1,5696 | 0,0112 | up | BX926768 Sus Scrofa library (scan) Sus scrofa cDNA clone scan0015.a.16 5prim, mRNA sequence                                              |
| A_72_P230897 |              | 1,5665 | 0,0297 | up | BP169889 full-length enriched swine cDNA library, adult uterus Sus scrofa cDNA clone UTR010005B01 5', mRNA sequence                      |
| A_72_P080318 | ACSL3        | 1,5661 | 0,0196 | up | Sus scrofa acyl-CoA synthetase long-chain family member 3 (ACSL3), mRNA                                                                  |
| A_72_P155906 |              | 1,5653 | 0,0094 | up | 875820 MARC 4PIG Sus scrofa cDNA 3', mRNA sequence                                                                                       |
| A_72_P259962 |              | 1,5579 | 0,0004 | up | 885854 MARC 4PIG Sus scrofa cDNA 3', mRNA sequence                                                                                       |
| A_72_P134961 |              | 1,5551 | 0,0352 | up | Pig DNA sequence from clone CH242-225C1 on chromosome X, complete sequence                                                               |
| A_72_P231247 |              | 1,5551 | 0,0134 | up | Sus scrofa mRNA, clone:BKFL10107G11, expressed in back fat                                                                               |
| A_72_P289774 | SERPINB8     | 1,5537 | 0,0198 | up | Sus scrofa serpin peptidase inhibitor, clade B (ovalbumin), member 8 (SERPINB8), mRNA                                                    |
| A_72_P489297 | LOC100737162 | 1,5520 | 0,0328 | up | Sus scrofa uncharacterized LOC100737162 (LOC100737162), mRNA                                                                             |
| A_72_P257367 | CUL5         | 1,5504 | 0,0157 | up | Sus scrofa cullin 5 (CUL5), mRNA                                                                                                         |
| A_72_P322803 | MCMBP        | 1,5491 | 0,0342 | up | Sus scrofa minichromosome maintenance complex binding protein (MCMBP), mRNA                                                              |
| A_72_P741589 |              | 1,5466 | 0,0259 | up | Sus scrofa mitochondrion, complete genome                                                                                                |
| A_72_P217282 | TOPAZ1       | 1,5452 | 0,0489 | up | PREDICTED: Sus scrofa testis and ovary specific PAZ domain containing 1 (TOPAZ1), partial mRNA                                           |
| A_72_P178331 |              | 1,5446 | 0,0211 | up | AJ961763 KN404_2 Sus scrofa cDNA clone C0007750d02 5', mRNA sequence                                                                     |
| A_72_P390863 |              | 1,5431 | 0,0217 | up | 539412 MARC 2PIG Sus scrofa cDNA 5', mRNA sequence                                                                                       |
| A_72_P393898 |              | 1,5416 | 0,0306 | up | Pig DNA sequence from clone CH242-235H24 on chromosome 14, complete sequence                                                             |
| A_72_P350353 |              | 1,5397 | 0,0474 | up | 835587 MARC 3PIG Sus scrofa cDNA 3', mRNA sequence                                                                                       |
| A_72_P589919 |              | 1,5387 | 0,0372 | up | Sus scrofa mRNA, clone:AMP010075C06, expressed in alveolar macrophage                                                                    |
| A_72_P108091 |              | 1,5379 | 0,0476 | up | Sus scrofa mRNA, clone:MLN010100H02, expressed in mesenteric lymph nodes                                                                 |
| A_72_P364728 | DDHD2        | 1,5365 | 0,0018 | up | Sus scrofa DDHD domain containing 2 (DDHD2), transcript variant X1, mRNA                                                                 |
| A_72_P226722 | SEC24A       | 1,5362 | 0,0382 | up | Sus scrofa SEC24 family, member A (S. cerevisiae) (SEC24A), mRNA                                                                         |
| A_72_P606508 | GOLGA4       | 1,5355 | 0,0387 | up | Sus scrofa golgin A4 (GOLGA4), mRNA                                                                                                      |
| A_72_P322948 |              | 1,5353 | 0,0153 | up | Sus scrofa mRNA, clone:OVRM10092G02, expressed in ovary                                                                                  |
| A_72_P211412 |              | 1,5352 | 0,0240 | up | AJ956694 KN404_2 Sus scrofa cDNA clone C0007748n08 5', mRNA sequence                                                                     |
| A_72_P003031 |              | 1,5320 | 0,0002 | up | 1144601 MARC 4PIG Sus scrofa cDNA 3', mRNA sequence                                                                                      |
| A_72_P049891 |              | 1,5320 | 0,0250 | up | 938707 MARC 4PIG Sus scrofa cDNA 5', mRNA sequence                                                                                       |
| A_72_P631310 | FAM214A      | 1,5318 | 0,0251 | up | Sus scrofa family with sequence similarity 214, member A (FAM214A), mRNA                                                                 |
| A_72_P049111 |              | 1,5306 | 0,0239 | up | Sus scrofa mRNA, clone:SPL010048D03, expressed in spleen                                                                                 |
| A_72_P208272 | LOC414428    | 1,5305 | 0,0444 | up | Sus scrofa muskelin 1 (LOC414428), mRNA                                                                                                  |
| A_72_P249247 |              | 1,5286 | 0,0034 | up | rpgl27_f8.y1 pgl Sus scrofa cDNA 5', mRNA sequence                                                                                       |
| A_72_P403523 |              | 1,5280 | 0,0448 | up | AJ960020 KN404_2 Sus scrofa cDNA clone C0007758k22 3', mRNA sequence                                                                     |
| A_72_P211902 |              | 1,5232 | 0,0431 | up | MI-P-AY1-nrs-c-10-0-UI.s1 MI-P-AY1 Sus scrofa cDNA clone MI-P-AY1-nrs-c-10-0-UI 3', mRNA sequence                                        |
| A_72_P489945 | ZNF518A      | 1,5222 | 0,0385 | up | Sus scrofa zinc finger protein 518A (ZNF518A), mRNA                                                                                      |
| A_72_P227292 |              | 1,5221 | 0,0254 | up | Sus scrofa mRNA, clone: AMP010074D07, expressed in alveolar macrophage                                                                   |
| A_72_P063271 | LOC106510391 | 1,5206 | 0,0275 | up | PREDICTED: Sus scrofa uncharacterized LOC106510391 (LOC106510391), ncRNA                                                                 |
| A_72_P055816 |              | 1,5200 | 0,0146 | up | Sus scrofa mRNA, clone:LVRM10114E03, expressed in liver                                                                                  |
| A_72_P148516 |              | 1,5178 | 0,0444 | up | BP155797 full-length enriched swine cDNA library, adult peripheral blood lymphocyte Sus scrofa cDNA clone PBL010032D11 5', mRNA sequence |
| A_72_P113531 |              | 1,5175 | 0,0397 | up | Sus scrofa mRNA, clone: MLTL10083F11, expressed in longissimus muscle                                                                    |
| A_72_P279964 |              | 1,5164 | 0,0443 | up | rgul0117_f9.y1 gul Sus scrofa cDNA 5', mRNA sequence                                                                                     |
| A_72_P404188 |              | 1,5163 | 0,0222 | up | Pig DNA sequence from clone CH242-171J7 on chromosome X, complete sequence                                                               |
| A_72_P189346 | LSMEM1       | 1,5156 | 0,0140 | up | Sus scrofa leucine-rich single-pass membrane protein 1 (LSMEM1), mRNA                                                                    |
| A_72_P243822 | SNAPC5       | 1,5153 | 0,0412 | up | Sus scrofa small nuclear RNA activating complex, polypeptide 5, 19kDa (SNAPC5), mRNA                                                     |
| A_72_P130541 |              | 1,5122 | 0,0167 | up | Sus scrofa mRNA, clone:OVRM10091G02, expressed in ovary                                                                                  |
| A_72_P109886 |              | 1,5114 | 0,0416 | up | AJ658972 KN277 Sus scrofa cDNA clone C0005215_F03, mRNA sequence                                                                         |

|              |              |        |        |    |                                                                                                                 |
|--------------|--------------|--------|--------|----|-----------------------------------------------------------------------------------------------------------------|
| A_72_P046946 |              | 1,5078 | 0,0238 | up | AJ957767 KN404_2 Sus scrofa cDNA clone C0007756j13 5', mRNA sequence                                            |
| A_72_P060276 |              | 1,5070 | 0,0223 | up | rhy30c_a7.y1 hyp Sus scrofa cDNA 5', mRNA sequence                                                              |
| A_72_P429234 | SCN2B        | 1,5046 | 0,0319 | up | PREDICTED: Sus scrofa sodium channel, voltage gated, type II beta subunit (SCN2B), transcript variant X1, mRNA  |
| A_72_P121166 |              | 1,5013 | 0,0440 | up | Sus scrofa mRNA, clone:THY010098E11, expressed in thymus                                                        |
| A_72_P383818 |              | 1,4988 | 0,0035 | up | 1570255 MARC 3PIG Sus scrofa cDNA 3', mRNA sequence                                                             |
| A_72_P085681 |              | 1,4978 | 0,0415 | up | Sus scrofa mRNA, clone:AMP010019C01, expressed in alveolar macrophage                                           |
| A_72_P239382 |              | 1,4966 | 0,0434 | up | Sus scrofa mRNA, clone:PTG010089B03, expressed in pituitary gland                                               |
| A_72_P015111 |              | 1,4963 | 0,0479 | up | 916813 MARC 4PIG Sus scrofa cDNA 3', mRNA sequence                                                              |
| A_72_P099856 |              | 1,4950 | 0,0481 | up | AJ963321 KN404_2 Sus scrofa cDNA clone C0007758j07 5', mRNA sequence                                            |
| A_72_P704201 | UGGT1        | 1,4945 | 0,0229 | up | Sus scrofa UDP-glucose glycoprotein glucosyltransferase 1 (UGGT1), mRNA                                         |
| A_72_P373148 |              | 1,4943 | 0,0402 | up | 1539590 MARC 3PIG Sus scrofa cDNA 3', mRNA sequence                                                             |
| A_72_P301044 |              | 1,4898 | 0,0269 | up | 1106092 MARC 4PIG Sus scrofa cDNA 5', mRNA sequence                                                             |
| A_72_P387143 | SYNCRIP      | 1,4881 | 0,0095 | up | Sus scrofa synaptotagmin binding, cytoplasmic RNA interacting protein (SYNCRIP), mRNA                           |
| A_72_P194712 |              | 1,4850 | 0,0318 | up | AJ958745 KN404_2 Sus scrofa cDNA clone C0007748g13 3', mRNA sequence                                            |
| A_72_P260222 |              | 1,4848 | 0,0429 | up | rtra16_e21r1.y1 tra Sus scrofa cDNA 5', mRNA sequence                                                           |
| A_72_P386738 |              | 1,4840 | 0,0308 | up | AJ958173 KN404_2 Sus scrofa cDNA clone C0007759e20 5', mRNA sequence                                            |
| A_72_P611673 | TTC14        | 1,4824 | 0,0224 | up | Sus scrofa tetratricopeptide repeat domain 14 (TTC14), mRNA                                                     |
| A_72_P704046 | TMEM177      | 1,4816 | 0,0275 | up | Sus scrofa transmembrane protein 177 (TMEM177), mRNA                                                            |
| A_72_P170426 |              | 1,4799 | 0,0123 | up | AJ957369 KN404_2 Sus scrofa cDNA clone C0007759e20 3', mRNA sequence                                            |
| A_72_P328018 |              | 1,4776 | 0,0357 | up | rspl03_g22.y1 spl Sus scrofa cDNA 5', mRNA sequence                                                             |
| A_72_P425174 |              | 1,4761 | 0,0383 | up | Sus scrofa mRNA, clone:AMP010075C06, expressed in alveolar macrophage                                           |
| A_72_P363858 |              | 1,4746 | 0,0368 | up | Sus scrofa mRNA, clone:OVRM10151D05, expressed in ovary                                                         |
| A_72_P081126 |              | 1,4741 | 0,0379 | up | Sus scrofa mRNA, clone:DCI010065A07, expressed in dendritic cells (immature)                                    |
| A_72_P145676 | LOC100620089 | 1,4730 | 0,0477 | up | Sus scrofa zinc finger protein 732-like (LOC100620089), mRNA                                                    |
| A_72_P167056 |              | 1,4728 | 0,0118 | up | Pig DNA sequence from clone CH242-289H21 on chromosome 4, complete sequence                                     |
| A_72_P707992 | CSN2         | 1,4719 | 0,0169 | up | Sus scrofa casein beta (CSN2), mRNA                                                                             |
| A_72_P009421 |              | 1,4678 | 0,0027 | up | AJ956544 KN404_2 Sus scrofa cDNA clone C0007749i16 5', mRNA sequence                                            |
| A_72_P400943 |              | 1,4677 | 0,0422 | up | ESTPBL133a differential display RT-PCR clones Sus scrofa cDNA clone BL133a, mRNA sequence                       |
| A_72_P288389 |              | 1,4672 | 0,0429 | up | AJ655810 KN277 Sus scrofa cDNA clone C0005191_M19, mRNA sequence                                                |
| A_72_P172196 |              | 1,4668 | 0,0408 | up | 1122050 MARC 4PIG Sus scrofa cDNA 3', mRNA sequence                                                             |
| A_72_P397858 |              | 1,4668 | 0,0271 | up | 137451 MARC 1PIG Sus scrofa cDNA 5', mRNA sequence                                                              |
| A_72_P726683 | MT-ND2       | 1,4663 | 0,0238 | up | Sus scrofa domesticus breed Mangalica mitochondrion, complete genome                                            |
| A_72_P340923 | SV2B         | 1,4623 | 0,0416 | up | Sus scrofa synaptic vesicle glycoprotein 2B (SV2B), mRNA                                                        |
| A_72_P240787 |              | 1,4557 | 0,0365 | up | 860845 MARC 4PIG Sus scrofa cDNA 5', mRNA sequence                                                              |
| A_72_P369213 |              | 1,4557 | 0,0163 | up | AJ664028 CSEQRAN09 Sus scrofa cDNA clone C0000028_D11, mRNA sequence                                            |
| A_72_P321488 |              | 1,4548 | 0,0362 | up | 807179 MARC 3PIG Sus scrofa cDNA 5', mRNA sequence                                                              |
| A_72_P257407 | ZBTB11       | 1,4545 | 0,0356 | up | Sus scrofa zinc finger and BTB domain containing 11 (ZBTB11), mRNA                                              |
| A_72_P154396 |              | 1,4539 | 0,0308 | up | AJ938463 CSEQRAN17 Sus scrofa cDNA clone C0007307i22 3', mRNA sequence                                          |
| A_72_P380793 |              | 1,4535 | 0,0061 | up | 917123 MARC 4PIG Sus scrofa cDNA 3', mRNA sequence                                                              |
| A_72_P094966 |              | 1,4535 | 0,0431 | up | AJ947512 KN404_1 Sus scrofa cDNA clone C0007746i03 5', mRNA sequence                                            |
| A_72_P473686 | DPY19L4      | 1,4526 | 0,0481 | up | Sus scrofa dpy-19-like 4 (C. elegans) (DPY19L4), mRNA                                                           |
| A_72_P257517 | SAMD8        | 1,4517 | 0,0363 | up | Sus scrofa sterile alpha motif domain containing 8 (SAMD8), mRNA                                                |
| A_72_P326458 | ENPP1        | 1,4517 | 0,0332 | up | Sus scrofa ectonucleotide pyrophosphatase/phosphodiesterase 1 (ENPP1), mRNA                                     |
| A_72_P731193 | GPM6B        | 1,4507 | 0,0084 | up | Sus scrofa glycoprotein M6B (GPM6B), mRNA                                                                       |
| A_72_P313248 |              | 1,4505 | 0,0440 | up | AJ659592 KN277 Sus scrofa cDNA clone C0005217_H21, mRNA sequence                                                |
| A_72_P066526 | KIF21A       | 1,4501 | 0,0339 | up | Sus scrofa kinesin family member 21A (KIF21A), mRNA                                                             |
| A_72_P396763 |              | 1,4470 | 0,0003 | up | 1139004 MARC 4PIG Sus scrofa cDNA 3', mRNA sequence                                                             |
| A_72_P213142 | RBM12        | 1,4464 | 0,0465 | up | PREDICTED: Sus scrofa RNA binding motif protein 12 (RBM12), transcript variant X1, mRNA                         |
| A_72_P315593 | NAA15        | 1,4447 | 0,0295 | up | Sus scrofa N(alpha)-acetyltransferase 15, NatA auxiliary subunit (NAA15), mRNA                                  |
| A_72_P081286 |              | 1,4432 | 0,0158 | up | Sus scrofa mRNA, clone:DCI010005C02, expressed in dendritic cells (immature)                                    |
| A_72_P285104 |              | 1,4422 | 0,0034 | up | Sus scrofa BAC clone CHORI242_375P3_Contig114                                                                   |
| A_72_P025536 |              | 1,4420 | 0,0180 | up | AJ956685 KN404_2 Sus scrofa cDNA clone C0007748g21 5', mRNA sequence                                            |
| A_72_P006641 |              | 1,4419 | 0,0365 | up | Sus scrofa serum paraoxonase/arylesterase 2-like (LOC100620687), mRNA                                           |
| A_72_P382353 |              | 1,4411 | 0,0389 | up | 853660 MARC 3PIG Sus scrofa cDNA 3', mRNA sequence                                                              |
| A_72_P310633 |              | 1,4377 | 0,0226 | up | 891871 MARC 4PIG Sus scrofa cDNA 3', mRNA sequence                                                              |
| A_72_P570469 |              | 1,4360 | 0,0466 | up | BX925554 Sus Scrofa library (scan) Sus scrofa cDNA clone scan0021.k.05 5prim, mRNA sequence                     |
| A_72_P416923 | ALG11        | 1,4339 | 0,0470 | up | Sus scrofa ALG11, alpha-1,2-mannosyltransferase (ALG11), mRNA                                                   |
| A_72_P113766 |              | 1,4335 | 0,0151 | up | 1538809 MARC 3PIG Sus scrofa cDNA 3', mRNA sequence                                                             |
| A_72_P442187 | ATP8         | 1,4322 | 0,0376 | up | Sus scrofa domesticus breed Mangalica mitochondrion, complete genome                                            |
| A_72_P216937 |              | 1,4307 | 0,0055 | up | 1114907 MARC 4PIG Sus scrofa cDNA 3', mRNA sequence                                                             |
| A_72_P646798 | FKBP3        | 1,4302 | 0,0392 | up | Sus scrofa FK506 binding protein 3, 25kDa (FKBP3), mRNA                                                         |
| A_72_P015186 |              | 1,4274 | 0,0350 | up | 1543733 MARC 3PIG Sus scrofa cDNA 5', mRNA sequence                                                             |
| A_72_P429784 | UBE3A        | 1,4274 | 0,0220 | up | Sus scrofa ubiquitin protein ligase E3A (UBE3A), mRNA                                                           |
| A_72_P279984 |              | 1,4264 | 0,0468 | up | HX221364 full-length enriched swine cDNA library, adult colon Sus scrofa cDNA clone CLNT10129C04, mRNA sequence |
| A_72_P707113 | GFRA2        | 1,4244 | 0,0036 | up | Sus scrofa GDNF family receptor alpha 2 (GFRA2), mRNA                                                           |
| A_72_P434289 |              | 1,4240 | 0,0392 | up | 1142416 MARC 4PIG Sus scrofa cDNA 3', mRNA sequence [DN128347]                                                  |
| A_72_P433354 |              | 1,4172 | 0,0458 | up | Pig DNA sequence from clone CH242-424M7 on chromosome X, complete sequence                                      |
| A_72_P544737 | KIAA0020     | 1,4171 | 0,0317 | up | Sus scrofa KIAA0020 ortholog (KIAA0020), mRNA                                                                   |
| A_72_P507958 | FOCAD        | 1,4130 | 0,0063 | up | Sus scrofa focadhesin (FOCAD), mRNA                                                                             |
| A_72_P102906 |              | 1,4114 | 0,0373 | up | 140981 MARC 1PIG Sus scrofa cDNA 5', mRNA sequence                                                              |

|              |              |        |        |    |                                                                                                                                    |
|--------------|--------------|--------|--------|----|------------------------------------------------------------------------------------------------------------------------------------|
| A_72_P636667 | CCDC152      | 1,4108 | 0,0418 | up | Sus scrofa coiled-coil domain containing 152 (CCDC152), mRNA                                                                       |
| A_72_P402578 |              | 1,4106 | 0,0309 | up | EST-AO234H12 Spleen from PRRSV-infected pig Sus scrofa cDNA clone AO234H12, mRNA sequence                                          |
| A_72_P362958 | VPS26A       | 1,4097 | 0,0442 | up | Sus scrofa vacuolar protein sorting 26 homolog A (S. pombe) (VPS26A), mRNA                                                         |
| A_72_P033936 | GNL3         | 1,4079 | 0,0189 | up | Sus scrofa guanine nucleotide binding protein-like 3 (nucleolar) (GNL3), transcript variant X4, mRNA                               |
| A_72_P249337 | ABCA3        | 1,4077 | 0,0054 | up | Sus scrofa ATP-binding cassette sub-family A member 3-like (LOC102166493), mRNA                                                    |
| A_72_P132686 | CUX2         | 1,4073 | 0,0475 | up | Sus scrofa cut-like homeobox 2 (CUX2), mRNA                                                                                        |
| A_72_P373553 |              | 1,4069 | 0,0287 | up | 821882 MARC 3PIG Sus scrofa cDNA 3', mRNA sequence                                                                                 |
| A_72_P177476 | RABGGTB      | 1,4065 | 0,0260 | up | Sus scrofa Rab geranylgeranyltransferase, beta subunit (RABGGTB), mRNA                                                             |
| A_72_P149441 | LOC100517984 | 1,4036 | 0,0430 | up | Sus scrofa UPF0415 protein C7orf25 homolog (LOC100517984), mRNA                                                                    |
| A_72_P199317 | UCHL5        | 1,4012 | 0,0484 | up | Sus scrofa ubiquitin carboxyl-terminal hydrolase L5 (UCHL5), mRNA                                                                  |
| A_72_P588316 |              | 1,3984 | 0,0322 | up | Sus scrofa mRNA, clone:AMP010075C06, expressed in alveolar macrophage                                                              |
| A_72_P356563 | LOC102162987 | 1,3981 | 0,0104 | up | Sus scrofa multidrug resistance-associated protein 6-like (LOC102162987), mRNA                                                     |
| A_72_P264577 |              | 1,3974 | 0,0262 | up | 1119645 MARC 4PIG Sus scrofa cDNA 3', mRNA sequence                                                                                |
| A_72_P240007 |              | 1,3974 | 0,0350 | up | 866550 MARC 4PIG Sus scrofa cDNA 3', mRNA sequence                                                                                 |
| A_72_P278029 |              | 1,3960 | 0,0064 | up | rcst33_i6.y1 cst Sus scrofa cDNA 5', mRNA sequence                                                                                 |
| A_72_P253967 |              | 1,3949 | 0,0181 | up | BP166821 full-length enriched swine cDNA library, adult thymus Sus scrofa cDNA clone THY010001G01 5', mRNA sequence                |
| A_72_P373903 |              | 1,3912 | 0,0244 | up | Sus scrofa mRNA, clone:LVRM10134E01, expressed in liver                                                                            |
| A_72_P314838 |              | 1,3900 | 0,0253 | up | Sus scrofa mRNA, clone:ITT010065D10, expressed in small intestine                                                                  |
| A_72_P365448 | KPNA5        | 1,3892 | 0,0164 | up | PREDICTED: Sus scrofa karyopherin alpha 5 (importin alpha 6) (KPNA5), transcript variant X1, mRNA                                  |
| A_72_P443162 | SMARCA1      | 1,3887 | 0,0221 | up | Sus scrofa SWI/SNF related, matrix associated, actin dependent regulator of chromatin, subfamily a, member 1 (SMARCA1), mRNA       |
| A_72_P436809 |              | 1,3879 | 0,0479 | up |                                                                                                                                    |
| A_72_P298164 | NUDT12       | 1,3873 | 0,0426 | up | Sus scrofa nudix (nucleoside diphosphate linked moiety X)-type motif 12 (NUDT12), mRNA                                             |
| A_72_P658461 |              | 1,3871 | 0,0367 | up | Sus scrofa mRNA, clone:AMP010025B11, expressed in alveolar macrophages                                                             |
| A_72_P472373 | RQCD1        | 1,3863 | 0,0085 | up | Sus scrofa RCD1 required for cell differentiation1 homolog (S. pombe) (RQCD1), mRNA.                                               |
| A_72_P305429 | DGKH         | 1,3862 | 0,0467 | up | PREDICTED: Sus scrofa diacylglycerol kinase, eta (DGKH), transcript variant X1, mRNA                                               |
| A_72_P409258 |              | 1,3850 | 0,0488 | up | 941956 MARC 4PIG Sus scrofa cDNA 3', mRNA sequence                                                                                 |
| A_72_P163136 | UBR1         | 1,3841 | 0,0187 | up | PREDICTED: Sus scrofa ubiquitin protein ligase E3 component n-recogin 1 (UBR1), mRNA                                               |
| A_72_P083301 |              | 1,3841 | 0,0277 | up | 1499884 MARC 3PIG Sus scrofa cDNA 3', mRNA sequence                                                                                |
| A_72_P084146 |              | 1,3834 | 0,0452 | up | 938891 MARC 4PIG Sus scrofa cDNA 5', mRNA sequence                                                                                 |
| A_72_P239357 | NOP56        | 1,3824 | 0,0025 | up | Sus scrofa NOP56 ribonucleoprotein homolog (yeast) (NOP56), mRNA                                                                   |
| A_72_P179031 |              | 1,3793 | 0,0401 | up | AJ957635 KN404_2 Sus scrofa cDNA clone C0007750p03 3', mRNA sequence                                                               |
| A_72_P283234 | KIAA1429     | 1,3769 | 0,0261 | up | PREDICTED: Sus scrofa KIAA1429 ortholog (KIAA1429), mRNA                                                                           |
| A_72_P216802 |              | 1,3756 | 0,0394 | up | 949746 MARC 4PIG Sus scrofa cDNA 5', mRNA sequence                                                                                 |
| A_72_P340503 |              | 1,3738 | 0,0203 | up | FS646627 full-length enriched swine cDNA library, adult brain (frontal lobe) Sus scrofa cDNA clone BFLT10084C05 5', mRNA sequence  |
| A_72_P348018 | LOC100626209 | 1,3723 | 0,0072 | up | Sus scrofa uncharacterized LOC100626209 (LOC100626209), mRNA                                                                       |
| A_72_P361613 |              | 1,3720 | 0,0127 | up | 998224 MARC 4PIG Sus scrofa cDNA 3', mRNA sequence                                                                                 |
| A_72_P394048 | TRMT11       | 1,3703 | 0,0176 | up | Sus scrofa tRNA methyltransferase 11 homolog (S. cerevisiae) (TRMT11), mRNA                                                        |
| A_72_P418334 |              | 1,3690 | 0,0390 | up | AJ658526 KN277 Sus scrofa cDNA clone C0005212_K17, mRNA sequence                                                                   |
| A_72_P109306 | ZNF667       | 1,3689 | 0,0228 | up | Sus scrofa zinc finger protein 667 (ZNF667), mRNA                                                                                  |
| A_72_P230722 |              | 1,3684 | 0,0271 | up | Sus scrofa mRNA, clone:TCH010100C01, expressed in trachea                                                                          |
| A_72_P003201 |              | 1,3664 | 0,0405 | up | Sus scrofa mRNA, clone:MLN010096B09, expressed in mesenteric lymph node                                                            |
| A_72_P087836 |              | 1,3654 | 0,0190 | up | 999930 MARC 4PIG Sus scrofa cDNA 3', mRNA sequence                                                                                 |
| A_72_P121356 |              | 1,3653 | 0,0487 | up | 1118251 MARC 4PIG Sus scrofa cDNA 3', mRNA sequence                                                                                |
| A_72_P257027 | SEPP1        | 1,3651 | 0,0229 | up | Sus scrofa selenoprotein P, plasma, 1 (SEPP1), mRNA                                                                                |
| A_72_P351699 |              | 1,3646 | 0,0359 | up | Sus scrofa mRNA, clone:LVRM10080C04, expressed in liver                                                                            |
| A_72_P489239 | RTKN2        | 1,3634 | 0,0311 | up | Sus scrofa rhotekin 2 (RTKN2), mRNA                                                                                                |
| A_72_P150986 |              | 1,3633 | 0,0400 | up | 355673 MARC 1PIG Sus scrofa cDNA 5', mRNA sequence                                                                                 |
| A_72_P254887 |              | 1,3631 | 0,0291 | up | 891989 MARC 4PIG Sus scrofa cDNA 3', mRNA sequence                                                                                 |
| A_72_P098371 | DCLRE1A      | 1,3613 | 0,0062 | up | Sus scrofa DNA cross-link repair 1A (DCLRE1A), mRNA                                                                                |
| A_72_P106626 | SLC35A5      | 1,3609 | 0,0321 | up | Sus scrofa solute carrier family 35, member A5 (SLC35A5), mRNA                                                                     |
| A_72_P258182 |              | 1,3603 | 0,0321 | up | PBL_19_G08 Porcine Brain Library Sus scrofa cDNA clone PBL 5', mRNA sequence                                                       |
| A_72_P188496 |              | 1,3577 | 0,0460 | up | 1116417 MARC 4PIG Sus scrofa cDNA 3', mRNA sequence                                                                                |
| A_72_P342313 |              | 1,3577 | 0,0398 | up | 1118906 MARC 4PIG Sus scrofa cDNA 3', mRNA sequence                                                                                |
| A_72_P396023 |              | 1,3573 | 0,0483 | up | 1543431 MARC 3PIG Sus scrofa cDNA 5', mRNA sequence                                                                                |
| A_72_P179526 | KDM1B        | 1,3548 | 0,0327 | up | Sus scrofa lysine (K)-specific demethylase 1B (KDM1B), mRNA                                                                        |
| A_72_P034166 |              | 1,3531 | 0,0020 | up | AJ953749 KN404_1 Sus scrofa cDNA clone C0007740o02 5', mRNA sequence                                                               |
| A_72_P663732 | RABGGTB      | 1,3527 | 0,0130 | up | Sus scrofa rab geranylgeranyltransferase, beta subunit (RABGGTB) mRNA, complete cds                                                |
| A_72_P051791 | TMEM68       | 1,3514 | 0,0280 | up | Sus scrofa transmembrane protein 68 (TMEM68), mRNA                                                                                 |
| A_72_P180541 | RPS6KB1      | 1,3494 | 0,0429 | up | Sus scrofa ribosomal protein S6 kinase, 70kDa, polypeptide 1 (RPS6KB1), mRNA                                                       |
| A_72_P403818 |              | 1,3488 | 0,0285 | up | 999216 MARC 4PIG Sus scrofa cDNA 3', mRNA sequence                                                                                 |
| A_72_P355333 |              | 1,3486 | 0,0375 | up | 1512280 MARC 3PIG Sus scrofa cDNA 3', mRNA sequence                                                                                |
| A_72_P162911 |              | 1,3476 | 0,0308 | up | rspc030_b8.y1 spc Sus scrofa cDNA 5', mRNA sequence                                                                                |
| A_72_P250332 | LOC100739232 | 1,3452 | 0,0286 | up | PREDICTED: Sus scrofa transmembrane protein 236 (LOC100739232), mRNA                                                               |
| A_72_P494665 | TMEM8B       | 1,3443 | 0,0053 | up | Sus scrofa transmembrane protein 8B (TMEM8B), mRNA                                                                                 |
| A_72_P173881 |              | 1,3437 | 0,0048 | up | UMC-pd10en3-021-e05 Endometrium gilt D10 of estrous cycle pd10en Sus scrofa cDNA 3', mRNA sequence                                 |
| A_72_P004571 |              | 1,3432 | 0,0363 | up | Sus scrofa mRNA, clone:TCH010070H12, expressed in trachea                                                                          |
| A_72_P235667 |              | 1,3429 | 0,0337 | up | CJ015393 full-length enriched swine cDNA library, adult mesenteric lymph node Sus scrofa cDNA clone MLN01H010095 5', mRNA sequence |
| A_72_P371093 | FAM81B       | 1,3419 | 0,0437 | up | Sus scrofa family with sequence similarity 81, member B (FAM81B), mRNA                                                             |
| A_72_P564269 | RABGGTB      | 1,3417 | 0,0452 | up | Sus scrofa Rab geranylgeranyltransferase, beta subunit (RABGGTB), mRNA                                                             |
| A_72_P371913 | MRS2         | 1,3412 | 0,0041 | up | Sus scrofa MRS2 magnesium transporter (MRS2), mRNA                                                                                 |
| A_72_P034096 |              | 1,3402 | 0,0215 | up | 1512978 MARC 3PIG Sus scrofa cDNA 3', mRNA sequence                                                                                |

|              |              |        |        |    |                                                                                                                      |
|--------------|--------------|--------|--------|----|----------------------------------------------------------------------------------------------------------------------|
| A_72_P722813 | SOCS4        | 1,3380 | 0,0274 | up | Sus scrofa suppressor of cytokine signaling 4 (SOCS4), mRNA                                                          |
| A_72_P007776 |              | 1,3376 | 0,0316 | up | 1512978 MARC 3PIG Sus scrofa cDNA 3', mRNA sequence                                                                  |
| A_72_P491350 |              | 1,3361 | 0,0312 | up | PREDICTED: Sus scrofa HBS1-like translational GTPase (HBS1L), transcript variant X1, mRNA                            |
| A_72_P103976 |              | 1,3352 | 0,0349 | up | 1107432 MARC 4PIG Sus scrofa cDNA 5', mRNA sequence                                                                  |
| A_72_P296474 |              | 1,3345 | 0,0336 | up | CJ029106 full-length enriched swine cDNA library, adult trachea Sus scrofa cDNA clone TCH01H040091 5', mRNA sequence |
| A_72_P560239 | SEPP1        | 1,3338 | 0,0232 | up | Sus scrofa selenoprotein P, plasma, 1 (SEPP1), mRNA                                                                  |
| A_72_P076386 |              | 1,3333 | 0,0290 | up | MI-P-E6-ahk-f-05-1-UM.s1 MI-P-E6 Sus scrofa cDNA clone MI-P-E6-ahk-f-05-1-UM 3', mRNA sequence                       |
| A_72_P277474 | HOOK1        | 1,3320 | 0,0269 | up | Sus scrofa hook microtubule-tethering protein 1 (HOOK1), mRNA                                                        |
| A_72_P675941 | COPS5        | 1,3316 | 0,0474 | up | Sus scrofa COP9 constitutive photomorphogenic homolog subunit 5 (Arabidopsis) (COPS5), mRNA                          |
| A_72_P198062 |              | 1,3314 | 0,0061 | up | 1512141 MARC 3PIG Sus scrofa cDNA 3', mRNA sequence                                                                  |
| A_72_P156176 |              | 1,3307 | 0,0445 | up | BP171071 full-length enriched swine cDNA library, adult uterus Sus scrofa cDNA clone UTR010020D03 5', mRNA sequence  |
| A_72_P562789 | LOC733678    | 1,3305 | 0,0382 | up | Sus scrofa ATP synthase H+-transporting mitochondrial F1 complex O subunit (LOC733678), mRNA                         |
| A_72_P606738 | BMPRI1A      | 1,3300 | 0,0369 | up | Sus scrofa bone morphogenetic protein receptor, type IA (BMPRI1A), mRNA                                              |
| A_72_P358358 | ATP9A        | 1,3294 | 0,0453 | up | Sus scrofa ATPase, class II, type 9A (ATP9A), mRNA                                                                   |
| A_72_P198057 | ATP5O        | 1,3282 | 0,0240 | up | Sus scrofa mitochondrial ATP5O (ATP5O) mRNA, complete cds; nuclear gene for mitochondrial product                    |
| A_72_P471711 | OLA1         | 1,3269 | 0,0247 | up | Sus scrofa Obg-like ATPase 1 (OLA1), mRNA                                                                            |
| A_72_P051831 | KPNA5        | 1,3268 | 0,0252 | up | PREDICTED: Sus scrofa karyopherin alpha 5 (importin alpha 6) (KPNA5), transcript variant X1, mRNA                    |
| A_72_P369743 |              | 1,3265 | 0,0119 | up | Pig DNA sequence from clone CH242-127N16 on chromosome X, complete sequence                                          |
| A_72_P043451 |              | 1,3262 | 0,0262 | up | MI-P-E6-ace-a-02-1-UM.s1 MI-P-E6 Sus scrofa cDNA clone MI-P-E6-ace-a-02-1-UM 3', mRNA sequence                       |
| A_72_P118076 |              | 1,3246 | 0,0445 | up | Sus scrofa mRNA, clone:TCH010015G11, expressed in trachea                                                            |
| A_72_P307728 |              | 1,3243 | 0,0428 | up | 1148873 MARC 4PIG Sus scrofa cDNA 3', mRNA sequence                                                                  |
| A_72_P405318 |              | 1,3242 | 0,0412 | up | CJ038202 full-length enriched swine cDNA library, adult uterus Sus scrofa cDNA clone UTR01C070089 5', mRNA sequence  |
| A_72_P099561 |              | 1,3231 | 0,0133 | up | AJ964528 KN404_2 Sus scrofa cDNA clone C0007755i23 5', mRNA sequence                                                 |
| A_72_P163921 |              | 1,3226 | 0,0214 | up | FS663198 full-length enriched swine cDNA library, adult colon Sus scrofa cDNA clone CLNT10085G03 5', mRNA sequence   |
| A_72_P383443 | LOC100517362 | 1,3224 | 0,0375 | up | Sus scrofa protein regulator of cytokinesis 1-like (LOC100517362), mRNA                                              |
| A_72_P027181 | PRC1         | 1,3223 | 0,0302 | up | PREDICTED: Sus scrofa protein regulator of cytokinesis 1 (PRC1), mRNA                                                |
| A_72_P288544 |              | 1,3219 | 0,0455 | up | 1519450 MARC 3PIG Sus scrofa cDNA 3', mRNA sequence                                                                  |
| A_72_P288734 | CCDC62       | 1,3205 | 0,0145 | up | Sus scrofa coiled-coil domain containing 62 (CCDC62), mRNA                                                           |
| A_72_P294684 | TMEM161B     | 1,3195 | 0,0341 | up | Sus scrofa transmembrane protein 161B (TMEM161B), mRNA                                                               |
| A_72_P445078 | CHUK         | 1,3190 | 0,0475 | up | Sus scrofa conserved helix-loop-helix ubiquitous kinase (CHUK), mRNA                                                 |
| A_72_P421779 |              | 1,3190 | 0,0455 | up | AJ947061 KN404_1 Sus scrofa cDNA clone C0007736j08 3', mRNA sequence                                                 |
| A_72_P015221 | LAMC2        | 1,3176 | 0,0300 | up | Sus scrofa laminin, gamma 2 (LAMC2), partial mRNA                                                                    |
| A_72_P443129 | PHEX         | 1,3162 | 0,0399 | up | Sus scrofa phosphate regulating endopeptidase homolog, X-linked (PHEX), mRNA                                         |
| A_72_P231717 |              | 1,3139 | 0,0024 | up | AJ947061 KN404_1 Sus scrofa cDNA clone C0007736j08 3', mRNA sequence                                                 |
| A_72_P074131 |              | 1,3130 | 0,0452 | up | 324735 MARC 1PIG Sus scrofa cDNA 5', mRNA sequence                                                                   |
| A_72_P345073 |              | 1,3111 | 0,0277 | up | Sus scrofa mRNA, clone:OVRT10007C12, expressed in ovary                                                              |
| A_72_P102136 |              | 1,3111 | 0,0137 | up | 322379 MARC 1PIG Sus scrofa cDNA 5', mRNA sequence                                                                   |
| A_72_P291904 |              | 1,3096 | 0,0036 | up | 817918 MARC 3PIG Sus scrofa cDNA 5', mRNA sequence                                                                   |
| A_72_P035116 | CDC45        | 1,3092 | 0,0197 | up | Sus scrofa cell division cycle 45 (CDC45), mRNA                                                                      |
| A_72_P693595 | TMEM30A      | 1,3073 | 0,0144 | up | Sus scrofa transmembrane protein 30A (TMEM30A), mRNA                                                                 |
| A_72_P377733 | LOC102160866 | 1,3072 | 0,0183 | up | Sus scrofa uncharacterized LOC102160866 (LOC102160866), misc_RNA                                                     |
| A_72_P230777 |              | 1,3063 | 0,0495 | up | Sus scrofa mRNA, clone:OVRM10109G02, expressed in ovary                                                              |
| A_72_P391593 |              | 1,3044 | 0,0385 | up | 866309 MARC 4PIG Sus scrofa cDNA 3', mRNA sequence                                                                   |
| A_72_P712688 | SLC35A3      | 1,3038 | 0,0313 | up | Sus scrofa solute carrier family 35 (UDP-N-acetylglucosamine (UDP-GlcNAc) transporter), member A3 (SLC35A3), mRNA    |
| A_72_P540403 | S100A16      | 1,3035 | 0,0449 | up | Sus scrofa S100 calcium binding protein A16 (S100A16), mRNA                                                          |
| A_72_P087651 |              | 1,3016 | 0,0407 | up | 1572153 MARC 3PIG Sus scrofa cDNA 3', mRNA sequence                                                                  |
| A_72_P227182 |              | 1,3015 | 0,0113 | up | BP461490 full-length enriched swine cDNA library, adult ovary Sus scrofa cDNA clone OVRM10190H02 5', mRNA sequence   |
| A_72_P272449 |              | 1,3015 | 0,0466 | up | AJ665946 CSEQRAN09 Sus scrofa cDNA clone C0000032_O16, mRNA sequence                                                 |
| A_72_P074001 |              | 1,3007 | 0,0160 | up | BX925554 Sus Scrofa library (scan) Sus scrofa cDNA clone scan0021.k.05 5prim, mRNA sequence                          |
| A_72_P434394 |              | 1,2981 | 0,0393 | up | BX925554 Sus Scrofa library (scan) Sus scrofa cDNA clone scan0021.k.05 5prim, mRNA sequence                          |
| A_72_P108176 |              | 1,2966 | 0,0109 | up | Sus scrofa mRNA, clone:OVR010040E04, expressed in ovary                                                              |
| A_72_P305714 | TFAM         | 1,2965 | 0,0393 | up | Sus scrofa transcription factor A, mitochondrial (TFAM), mRNA                                                        |
| A_72_P125216 | NCKAP1       | 1,2961 | 0,0342 | up | Sus scrofa NCK-associated protein 1 (NCKAP1), mRNA                                                                   |
| A_72_P163046 | STX1A        | 1,2946 | 0,0307 | up | Sus scrofa syntaxin 1A (brain) (STX1A), mRNA                                                                         |
| A_72_P361888 |              | 1,2911 | 0,0139 | up | 234109 MARC 2PIG Sus scrofa cDNA 5', mRNA sequence                                                                   |
| A_72_P570109 | MTDH         | 1,2900 | 0,0442 | up | Sus scrofa metadherin (MTDH), mRNA                                                                                   |
| A_72_P257229 | RBM26        | 1,2899 | 0,0130 | up | Sus scrofa RNA binding motif protein 26 (RBM26), mRNA                                                                |
| A_72_P641204 | TDRD7        | 1,2888 | 0,0097 | up | Sus scrofa tudor domain containing 7 (TDRD7), mRNA                                                                   |
| A_72_P602603 | ARHGAP11A    | 1,2884 | 0,0009 | up | Sus scrofa Rho GTPase activating protein 11A (ARHGAP11A), mRNA                                                       |
| A_72_P742361 |              | 1,2863 | 0,0210 | up | Sus scrofa complete mitochondrial DNA                                                                                |
| A_72_P444255 | PPP2R2A      | 1,2858 | 0,0479 | up | Sus scrofa protein phosphatase 2, regulatory subunit B, alpha (PPP2R2A), mRNA                                        |
| A_72_P752715 |              | 1,2854 | 0,0494 | up | Sus scrofa complete mitochondrial DNA                                                                                |
| A_72_P738029 |              | 1,2842 | 0,0408 | up | Sus scrofa mitochondrion, complete genome                                                                            |
| A_72_P313668 | CRK          | 1,2835 | 0,0400 | up | Sus scrofa v-crk sarcoma virus CT10 oncogene homolog (avian) (CRK), mRNA                                             |
| A_72_P179751 | RDH11        | 1,2826 | 0,0411 | up | Sus scrofa retinol dehydrogenase 11 (all-trans/9-cis/11-cis) (RDH11), mRNA                                           |
| A_72_P149281 |              | 1,2822 | 0,0094 | up | 943157 MARC 4PIG Sus scrofa cDNA 5', mRNA sequence                                                                   |
| A_72_P071441 | HPCAL4       | 1,2806 | 0,0210 | up | Sus scrofa hippocalcin like 4 (HPCAL4), mRNA                                                                         |
| A_72_P154136 | ZNF445       | 1,2790 | 0,0022 | up | Sus scrofa zinc finger protein 445 (ZNF445), mRNA                                                                    |
| A_72_P580007 | C5H12orf11   | 1,2774 | 0,0340 | up | Sus scrofa chromosome 12 open reading frame 11 ortholog (C5H12orf11), mRNA                                           |
| A_72_P035326 | ENPEP        | 1,2766 | 0,0084 | up | Sus scrofa glutamyl aminopeptidase (aminopeptidase A) (ENPEP), mRNA                                                  |
| A_72_P132466 | NFXL1        | 1,2762 | 0,0236 | up | Sus scrofa nuclear transcription factor, X-box binding-like 1 (NFXL1), mRNA                                          |

|              |              |        |        |    |                                                                                                              |
|--------------|--------------|--------|--------|----|--------------------------------------------------------------------------------------------------------------|
| A_72_P055721 |              | 1,2748 | 0,0190 | up | Pig DNA sequence from clone CH242-454E1 on chromosome 4, complete sequence                                   |
| A_72_P543767 | EIF2S1       | 1,2729 | 0,0426 | up | Sus scrofa eukaryotic translation initiation factor 2, subunit 1 alpha, 35kDa (EIF2S1), mRNA                 |
| A_72_P725283 |              | 1,2726 | 0,0256 | up | Sus scrofa mitochondrion, complete genome                                                                    |
| A_72_P095841 |              | 1,2724 | 0,0203 | up | ramn3510b_m9.y1 amn Sus scrofa cDNA 5', mRNA sequence                                                        |
| A_72_P273124 |              | 1,2711 | 0,0288 | up | 1572764 MARC 3PIG Sus scrofa cDNA 3', mRNA sequence                                                          |
| A_72_P366478 | TRDMT1       | 1,2705 | 0,0003 | up | Sus scrofa tRNA aspartic acid methyltransferase 1 (TRDMT1), mRNA                                             |
| A_72_P221152 |              | 1,2702 | 0,0227 | up | 1512348 MARC 3PIG Sus scrofa cDNA 3', mRNA sequence                                                          |
| A_72_P016366 | WDR3         | 1,2664 | 0,0345 | up | Sus scrofa WD repeat domain 3 (WDR3), mRNA                                                                   |
| A_72_P345358 | ETFA         | 1,2654 | 0,0468 | up | Sus scrofa electron-transfer-flavoprotein, alpha polypeptide (ETFA), mRNA                                    |
| A_72_P042086 |              | 1,2650 | 0,0172 | up | Sus scrofa mRNA, clone:UTR010043B06, expressed in uterus                                                     |
| A_72_P102016 | ARHGAP29     | 1,2649 | 0,0237 | up | Sus scrofa Rho GTPase activating protein 29 (ARHGAP29), mRNA                                                 |
| A_72_P356953 | ZBTB1        | 1,2642 | 0,0010 | up | Sus scrofa zinc finger and BTB domain containing 1 (ZBTB1), mRNA                                             |
| A_72_P207947 | ABL2         | 1,2640 | 0,0484 | up | PREDICTED: Sus scrofa ABL proto-oncogene 2, non-receptor tyrosine kinase (ABL2), transcript variant X8, mRNA |
| A_72_P092336 |              | 1,2625 | 0,0434 | up | 998973 MARC 4PIG Sus scrofa cDNA 3', mRNA sequence                                                           |
| A_72_P337793 |              | 1,2624 | 0,0382 | up | 892055 MARC 4PIG Sus scrofa cDNA 3', mRNA sequence                                                           |
| A_72_P304814 | UGGT1        | 1,2610 | 0,0448 | up | Sus scrofa UDP-glucose glycoprotein glucosyltransferase 1 (UGGT1), mRNA                                      |
| A_72_P122311 |              | 1,2603 | 0,0124 | up | AJ956967 KN404_2 Sus scrofa cDNA clone C0007756j13 3', mRNA sequence                                         |
| A_72_P316923 | FSD1L        | 1,2600 | 0,0167 | up | Sus scrofa fibronectin type III and SPRY domain containing 1-like (FSD1L), mRNA                              |
| A_72_P216227 | TPRKB        | 1,2600 | 0,0298 | up | Sus scrofa TP53RK binding protein (TPRKB), mRNA                                                              |
| A_72_P364388 |              | 1,2580 | 0,0359 | up | Sus scrofa clone KVL15634 microsatellite sequence                                                            |
| A_72_P210362 |              | 1,2578 | 0,0476 | up | UMC-pmpllg_0-008-e06 Pig Metaphase II Gilt/MU pmpllg Sus scrofa cDNA 3', mRNA sequence                       |
| A_72_P216212 |              | 1,2567 | 0,0448 | up | rthg14_p5.y1 thg Sus scrofa cDNA 5', mRNA sequence                                                           |
| A_72_P128586 | BMS1         | 1,2554 | 0,0464 | up | Sus scrofa BMS1 ribosome biogenesis factor (BMS1), mRNA                                                      |
| A_72_P386443 |              | 1,2548 | 0,0126 | up | AJ941456 CSEQRAN17 Sus scrofa cDNA clone C0007305a16 3', mRNA sequence                                       |
| A_72_P004991 |              | 1,2547 | 0,0085 | up | Pig DNA sequence from clone CH242-239D10 on chromosome X, complete sequence                                  |
| A_72_P006016 | MYBL2        | 1,2531 | 0,0134 | up | Sus scrofa v-myb myeloblastosis viral oncogene homolog (avian)-like 2 (MYBL2), mRNA                          |
| A_72_P219647 | FAM83C       | 1,2502 | 0,0203 | up | Sus scrofa family with sequence similarity 83, member C (FAM83C), mRNA                                       |
| A_72_P020486 |              | 1,2502 | 0,0329 | up |                                                                                                              |
| A_72_P125516 | FAM196B      | 1,2480 | 0,0326 | up | Sus scrofa family with sequence similarity 196, member B (FAM196B), mRNA                                     |
| A_72_P172681 | XKR5         | 1,2467 | 0,0280 | up | Sus scrofa XK, Kell blood group complex subunit-related family, member 5 (XKR5), mRNA                        |
| A_72_P135131 |              | 1,2447 | 0,0319 | up | Sus scrofa mRNA, clone: BFLT10037B05, expressed in brain (frontal lobe)                                      |
| A_72_P455672 | HCFC2        | 1,2441 | 0,0176 | up | Sus scrofa host cell factor C2 (HCFC2), mRNA                                                                 |
| A_72_P422559 |              | 1,2429 | 0,0441 | up | Sus scrofa mRNA, clone:OVRM10168A06, expressed in ovary                                                      |
| A_72_P003481 | CROT         | 1,2419 | 0,0086 | up | Sus scrofa carnitine O-octanoyltransferase (CROT), mRNA                                                      |
| A_72_P002476 | C7H15orf29   | 1,2417 | 0,0442 | up | Sus scrofa chromosome 15 open reading frame 29 (C7H15orf29), mRNA                                            |
| A_72_P252987 |              | 1,2416 | 0,0111 | up |                                                                                                              |
| A_72_P354143 | PAPOLA       | 1,2396 | 0,0390 | up | Sus scrofa poly(A) polymerase alpha (PAPOLA), mRNA                                                           |
| A_72_P553436 | RUSC1        | 1,2380 | 0,0290 | up | Sus scrofa RUN and SH3 domain containing 1 (RUSC1), mRNA                                                     |
| A_72_P374203 |              | 1,2378 | 0,0345 | up |                                                                                                              |
| A_72_P663877 | MED23        | 1,2351 | 0,0225 | up | Sus scrofa mediator complex subunit 23 (MED23), partial mRNA                                                 |
| A_72_P300114 | FANCA        | 1,2336 | 0,0177 | up | Sus scrofa Fanconi anemia, complementation group A (FANCA), mRNA                                             |
| A_72_P225637 | LOC102164478 | 1,2329 | 0,0168 | up | Sus scrofa uncharacterized LOC102164478 (LOC102164478), misc_RNA                                             |
| A_72_P443065 |              | 1,2327 | 0,0396 | up | Sus scrofa mRNA, clone:OVRM10182E03, expressed in ovary                                                      |
| A_72_P741664 |              | 1,2319 | 0,0106 | up | Sus scrofa mitochondrion, complete genome                                                                    |
| A_72_P041866 | CCDC90B      | 1,2318 | 0,0442 | up | Sus scrofa coiled-coil domain containing 90B (CCDC90B), mRNA                                                 |
| A_72_P242357 | TAF2         | 1,2305 | 0,0050 | up | Sus scrofa TAF2 RNA polymerase II, TATA box binding protein (TBP)-associated factor, 150kDa (TAF2), mRNA     |
| A_72_P743581 | DENR         | 1,2302 | 0,0398 | up | Sus scrofa density-regulated protein (DENR), mRNA                                                            |
| A_72_P337983 |              | 1,2292 | 0,0310 | up | Pig DNA sequence from clone CH242-198K1 on chromosome X, complete sequence                                   |
| A_72_P069516 |              | 1,2285 | 0,0040 | up | Sus scrofa mRNA, clone: PBL010084A03, expressed in peripheral blood lymphocytes                              |
| A_72_P429429 |              | 1,2279 | 0,0478 | up | AJ958574 KN404_2 Sus scrofa cDNA clone C0007758i04 5', mRNA sequence                                         |
| A_72_P408073 | CLPX         | 1,2275 | 0,0288 | up | Sus scrofa caseinolytic mitochondrial matrix peptidase chaperone subunit (CLPX), mRNA                        |
| A_72_P080626 |              | 1,2270 | 0,0210 | up | HX233885 full-length enriched swine cDNA library, adult inguinal lymph node                                  |
| A_72_P490208 | TAF5         | 1,2267 | 0,0072 | up | Sus scrofa TAF5 RNA polymerase II, TATA box binding protein (TBP)-associated factor, 100kDa (TAF5), mRNA     |
| A_72_P753106 |              | 1,2255 | 0,0467 | up | Sus scrofa mitochondrion, complete genome                                                                    |
| A_72_P264912 |              | 1,2255 | 0,0072 | up | 258058 MARC 2PIG Sus scrofa cDNA 5', mRNA sequence                                                           |
| A_72_P772081 |              | 1,2254 | 0,0233 | up | Sus scrofa mitochondrion, complete genome                                                                    |
| A_72_P213257 | MYCBP        | 1,2253 | 0,0073 | up | Sus scrofa c-myc binding protein (MYCBP), mRNA                                                               |
| A_72_P536495 |              | 1,2240 | 0,0236 | up | Sus scrofa mRNA, clone: BFLT10095E07, expressed in brain (frontal lobe)                                      |
| A_72_P070096 | ABCE1        | 1,2236 | 0,0181 | up | Sus scrofa ATP-binding cassette, sub-family E (OABP), member 1 (ABCE1), mRNA                                 |
| A_72_P492748 | AP4E1        | 1,2236 | 0,0257 | up | Sus scrofa adaptor-related protein complex 4, epsilon 1 subunit (AP4E1), mRNA                                |
| A_72_P152056 |              | 1,2234 | 0,0175 | up | Sus scrofa mRNA, clone:LNG010057A05, expressed in lung                                                       |
| A_72_P497594 | SF3B1        | 1,2213 | 0,0193 | up | PREDICTED: Sus scrofa splicing factor 3b, subunit 1, 155kDa (SF3B1), transcript variant X1, mRNA             |
| A_72_P179281 | ASCC3        | 1,2200 | 0,0114 | up | Sus scrofa activating signal cointegrator 1 complex subunit 3 (ASCC3), mRNA                                  |
| A_72_P130971 |              | 1,2193 | 0,0443 | up | 1572748 MARC 3PIG Sus scrofa cDNA 3', mRNA sequence                                                          |
| A_72_P365378 | CPEB2        | 1,2190 | 0,0152 | up | Sus scrofa cytoplasmic polyadenylation element binding protein 2 (CPEB2), mRNA                               |
| A_72_P212087 | LOC100522644 | 1,2189 | 0,0221 | up | Sus scrofa uncharacterized LOC100522644 (LOC100522644), misc_RNA                                             |
| A_72_P158086 | ARFIP1       | 1,2183 | 0,0059 | up | Sus scrofa ADP-ribosylation factor interacting protein 1 (ARFIP1), mRNA                                      |
| A_72_P277109 |              | 1,2175 | 0,0361 | up | rcst12_h13.y1 cst Sus scrofa cDNA 5', mRNA sequence                                                          |
| A_72_P004791 |              | 1,2168 | 0,0491 | up | MI-P-H3-adl-a-05-1-UM.s1 MI-P-H3 Sus scrofa cDNA clone MI-P-H3-adl-a-05-1-UM 3', mRNA sequence               |
| A_72_P502256 |              | 1,2156 | 0,0421 | up | rnbm09b_a20.y1 nbm Sus scrofa cDNA 5', mRNA sequence                                                         |



|              |         |        |        |    |                                                                                                                                 |
|--------------|---------|--------|--------|----|---------------------------------------------------------------------------------------------------------------------------------|
| A_72_P106921 | WDR35   | 1,2126 | 0,0498 | up | Sus scrofa WD repeat domain 35 (WDR35), mRNA                                                                                    |
| A_72_P180726 | VAR5    | 1,2126 | 0,0224 | up | Sus scrofa valyl-tRNA synthetase (VAR5), mRNA                                                                                   |
| A_72_P032746 |         | 1,2125 | 0,0410 | up | Sus scrofa mRNA, clone:OVR010040B12, expressed in ovary                                                                         |
| A_72_P679684 |         | 1,2120 | 0,0380 | up | Sus scrofa mRNA, clone: SPL010090H05, expressed in spleen                                                                       |
| A_72_P015071 |         | 1,2113 | 0,0238 | up | 1555810 MARC 3PIG Sus scrofa cDNA 3', mRNA sequence                                                                             |
| A_72_P252022 |         | 1,2110 | 0,0310 | up | 1520836 MARC 3PIG Sus scrofa cDNA 3', mRNA sequence                                                                             |
| A_72_P388463 |         | 1,2107 | 0,0454 | up | Pig DNA sequence from clone CH242-227A13 on chromosome 14, complete sequence                                                    |
| A_72_P114136 |         | 1,2098 | 0,0351 | up | Pig DNA sequence from clone CH242-391F13 on chromosome 4, complete sequence                                                     |
| A_72_P544487 | DBF4    | 1,2060 | 0,0084 | up | Sus scrofa DBF4 homolog (S. cerevisiae) (DBF4), mRNA                                                                            |
| A_72_P510905 |         | 1,2053 | 0,0459 | up | Sus scrofa mRNA, clone:UTR010069C12, expressed in uterus                                                                        |
| A_72_P227347 |         | 1,2037 | 0,0212 | up | 815526 MARC 3PIG Sus scrofa cDNA 3', mRNA sequence                                                                              |
| A_72_P404478 | LARP4   | 1,2015 | 0,0327 | up | Sus scrofa La ribonucleoprotein domain family, member 4 (LARP4), mRNA                                                           |
| A_72_P217922 |         | 1,2008 | 0,0457 | up | 815526 MARC 3PIG Sus scrofa cDNA 3', mRNA sequence                                                                              |
| A_72_P729778 | ND1     | 1,1999 | 0,0314 | up | NADH-ubiquinone oxidoreductase chain 1 [Source:UniProtKB/Swiss-Prot;Acc:O79874] [ENSSSCT00000019660]                            |
| A_72_P384403 | DCAF13  | 1,1994 | 0,0092 | up | DDB1 and CUL4 associated factor 13 [Source:HGNC Symbol;Acc:24535] [ENSSSCT00000006637]                                          |
| A_72_P406428 | SERINC2 | 1,1984 | 0,0500 | up | Sus scrofa serine incorporator 2 (SERINC2), mRNA [NM_001244148]                                                                 |
| A_72_P725783 | CYTB    | 1,1975 | 0,0478 | up | cytochrome b [Source:RefSeq peptide;Acc:NP_008646] [ENSSSCT00000019689]                                                         |
| A_72_P643304 | HRSP12  | 1,1961 | 0,0439 | up | heat-responsive protein 12 [Source:HGNC Symbol;Acc:16897] [ENSSSCT00000006670]                                                  |
| A_72_P288029 |         | 1,1922 | 0,0300 | up | Sus scrofa mRNA, clone:LVRM10003A02, expressed in liver. [AK232675]                                                             |
| A_72_P171441 |         | 1,1921 | 0,0498 | up |                                                                                                                                 |
| A_72_P024821 |         | 1,1918 | 0,0289 | up | family with sequence similarity 133, member B [Source:HGNC Symbol;Acc:28629] [ENSSSCT00000016690]                               |
| A_72_P363218 | CA5B    | 1,1897 | 0,0363 | up | carbonic anhydrase VB, mitochondrial [Source:HGNC Symbol;Acc:1378] [ENSSSCT00000034853]                                         |
| A_72_P228577 |         | 1,1892 | 0,0375 | up | Rep: Mitochondrial-processing peptidase subunit alpha, mitochondrial precursor - Homo sapiens (Human), partial (20%) [TC564485] |
| A_72_P020856 |         | 1,1882 | 0,0194 | up | Rep: 3'-5' exonuclease component of the exosome - Chlamydomonas reinhardtii, partial (7%) [TC544894]                            |
| A_72_P441439 | ERO1L   | 1,1881 | 0,0446 | up | Sus scrofa ERO1-like (S. cerevisiae) (ERO1L), mRNA [NM_001137627]                                                               |
| A_72_P340148 |         | 1,1866 | 0,0355 | up |                                                                                                                                 |
| A_72_P050301 | IREB2   | 1,1846 | 0,0141 | up | Sus scrofa iron-responsive element binding protein 2 (IREB2), mRNA [NM_001167781]                                               |
| A_72_P587836 | VCL     | 1,1825 | 0,0479 | up | Sus scrofa vinculin (VCL), mRNA [NM_213934]                                                                                     |
| A_72_P601633 | PGRMC1  | 1,1815 | 0,0188 | up | Sus scrofa progesterone receptor membrane component 1 (PGRMC1), mRNA [NM_213911]                                                |
| A_72_P346132 |         | 1,1813 | 0,0362 | up | MI-P-AY1-nqw-a-12-0-UI.s1 MI-P-AY1 Sus scrofa cDNA clone MI-P-AY1-nqw-a-12-0-UI 3', mRNA sequence [BI400387]                    |
| A_72_P493667 | TIPIN   | 1,1802 | 0,0280 | up | TIMELESS interacting protein [Source:HGNC Symbol;Acc:30750] [ENSSSCT00000005454]                                                |
| A_72_P584606 | ETFA    | 1,1801 | 0,0133 | up | Sus scrofa electron-transfer-flavoprotein, alpha polypeptide (ETFA), mRNA [NM_001244403]                                        |
| A_72_P312938 |         | 1,1799 | 0,0385 | up | Rep: Zinc transporter 9 - Pongo pygmaeus (Orangutan), partial (27%) [TC560316]                                                  |
| A_72_P269114 |         | 1,1791 | 0,0466 | up | Sus scrofa mRNA, clone:MLN010084D05, expressed in mesenteric lymph node. [AK233976]                                             |
| A_72_P315823 |         | 1,1787 | 0,0056 | up | Rep: VACUOLAR ATP SYNTHASE SUBUNIT C - Encephalitozoon cuniculi, partial (5%) [TC609086]                                        |
| A_72_P189881 |         | 1,1785 | 0,0329 | up | Sus scrofa mRNA, clone:PTG010054A01, expressed in pituitary gland. [AK349352]                                                   |
| A_72_P083366 |         | 1,1782 | 0,0458 | up | 48036 MARC 1PIG Sus scrofa cDNA 5', mRNA sequence [AW482851]                                                                    |
| A_72_P315768 |         | 1,1767 | 0,0417 | up |                                                                                                                                 |
| A_72_P362643 |         | 1,1762 | 0,0262 | up | Sus scrofa mRNA, clone:OVRM10182B05, expressed in ovary. [AK348490]                                                             |
| A_72_P027711 |         | 1,1738 | 0,0430 | up | Rep: nucleoporin 133kDa - Bos Taurus, partial (29%) [TC594340]                                                                  |
| A_72_P569064 |         | 1,1709 | 0,0179 | up | Rep: Conserved membrane protein, multidrug efflux associated - Synechococcus sp. RS9916, partial (6%) [TC549730]                |
| A_72_P587986 | EBAG9   | 1,1699 | 0,0450 | up | estrogen receptor binding site associated, antigen, 9 [Source:HGNC Symbol;Acc:3123] [ENSSSCT00000006611]                        |
| A_72_P187213 |         | 1,1691 | 0,0272 | up | POSM0605011_G22R porcine skeletal muscle cDNA library (PoSM) Sus scrofa cDNA 3', mRNA sequence [DV899440]                       |
| A_72_P273319 |         | 1,1688 | 0,0480 | up | cleavage and polyadenylation specific factor 1, 160kDa [Source:HGNC Symbol;Acc:2324] [ENSSSCT00000033818]                       |
| A_72_P502685 | MT-2B   | 1,1665 | 0,0373 | up | rckl012_d23.y1 cki Sus scrofa cDNA 5', mRNA sequence [EV949314]                                                                 |
| A_72_P491744 | SYNCRIP | 1,1657 | 0,0373 | up | Sus scrofa mRNA, clone:MLN010075A08, expressed in mesenteric lymph nodes. [AK346917]                                            |
| A_72_P478846 | DCAF4   | 1,1654 | 0,0175 | up | Uncharacterized protein [Source:UniProtKB/TrEMBL;Acc:F1S3L1] [ENSSSCT00000025390]                                               |
| A_72_P122066 |         | 1,1654 | 0,0417 | up | Rep: Peptidase M56, BlaR1 precursor - Caulobacter sp. K31, partial (4%) [TC560927]                                              |
| A_72_P402023 |         | 1,1644 | 0,0136 | up |                                                                                                                                 |
| A_72_P132526 | NAA35   | 1,1636 | 0,0340 | up | N(alpha)-acetyltransferase 35, NatC auxiliary subunit [Source:HGNC Symbol;Acc:24340] [ENSSSCT00000011992]                       |
| A_72_P379728 |         | 1,1631 | 0,0294 | up | Rep: Cytochrome c-type biogenesis protein ccmE - Pelagibacter ubique, partial (14%) [TC528085]                                  |
| A_72_P199712 |         | 1,1599 | 0,0000 | up | MI-P-H3-adl-e-03-1-UM.s1 MI-P-H3 Sus scrofa cDNA clone MI-P-H3-adl-e-03-1-UM 3', mRNA sequence [BF712745]                       |
| A_72_P007551 |         | 1,1577 | 0,0175 | up | rthg19_I3.y1 thg Sus scrofa cDNA 5', mRNA sequence [EW643975]                                                                   |
| A_72_P187966 |         | 1,1563 | 0,0213 | up | AJ948602 KN404_1 Sus scrofa cDNA clone C0007746b05 3', mRNA sequence [AJ948602]                                                 |
| A_72_P158496 | NUDCD1  | 1,1558 | 0,0004 | up | Sus scrofa mRNA, clone:AMP010014H05, expressed in alveolar macrophage. [AK230599]                                               |
| A_72_P364318 |         | 1,1555 | 0,0120 | up | Rep: Tubulin beta-2B chain - Homo sapiens (Human), partial (47%) [TC553963]                                                     |
| A_72_P092506 |         | 1,1521 | 0,0207 | up | Rep: PREDICTED: chromosome transmission fidelity factor 8 protein isoform 2 - Pan troglodytes, complete [TC543210]              |
| A_72_P363303 |         | 1,1497 | 0,0394 | up | Rep: Glutamate-cysteine ligase GSHA - Frankia alni (strain ACN14a), partial (4%) [TC585473]                                     |
| A_72_P207257 |         | 1,1491 | 0,0287 | up |                                                                                                                                 |
| A_72_P086886 |         | 1,1488 | 0,0136 | up | Sus scrofa mRNA, clone: LVRM10140A02, expressed in liver. [AK394281]                                                            |
| A_72_P312388 |         | 1,1471 | 0,0066 | up | AJ961381 KN404_2 Sus scrofa cDNA clone C0007751g04 3', mRNA sequence [AJ961381]                                                 |
| A_72_P406188 | MTRR    | 1,1458 | 0,0379 | up | 5-methyltetrahydrofolate-homocysteine methyltransferase reductase [Source:HGNC Symbol;Acc:7473] [ENSSSCT00000018618]            |

|              |              |        |        |      |                                                                                                                                                                                                                                                                                                                   |
|--------------|--------------|--------|--------|------|-------------------------------------------------------------------------------------------------------------------------------------------------------------------------------------------------------------------------------------------------------------------------------------------------------------------|
| A_72_P493552 | KIAA1468     | 1,1449 | 0,0322 | up   | PREDICTED: Sus scrofa IisH domain and HEAT repeat-containing protein KIAA1468-like (LOC100521354), mRNA [XM_003121702]                                                                                                                                                                                            |
| A_72_P293389 |              | 1,1438 | 0,0221 | up   | BX918737 Sus Scrofa library (scan) Sus scrofa cDNA clone scan0035.c.18 5prim, mRNA sequence [BX918737]                                                                                                                                                                                                            |
| A_72_P742844 |              | 1,1435 | 0,0459 | up   | Histone H3.3 [Source:UniProtKB/Swiss-Prot;Acc:Q71LE2] [ENSSSCT00000018727]                                                                                                                                                                                                                                        |
| A_72_P396473 |              | 1,1406 | 0,0295 | up   |                                                                                                                                                                                                                                                                                                                   |
| A_72_P020069 | MMP11        | 1,1405 | 0,0109 | up   | matrix metalloproteinase 11 (stromelysin 3) [Source:HGNC Symbol;Acc:7157] [ENSSSCT00000011032]                                                                                                                                                                                                                    |
| A_72_P565069 | IREB2        | 1,1395 | 0,0116 | up   | Sus scrofa iron-responsive element binding protein 2 (IREB2), mRNA [NM_001167781]                                                                                                                                                                                                                                 |
| A_72_P265942 |              | 1,1392 | 0,0406 | up   | 1101965 MARC 4PIG Sus scrofa cDNA 5', mRNA sequence [DN105690]                                                                                                                                                                                                                                                    |
| A_72_P544799 | SET          | 1,1390 | 0,0188 | up   | Sus scrofa SET nuclear oncogene (SET), mRNA [NM_001244090]                                                                                                                                                                                                                                                        |
| A_72_P259617 |              | 1,1349 | 0,0271 | up   |                                                                                                                                                                                                                                                                                                                   |
| A_72_P077581 | NGB          | 1,1325 | 0,0170 | up   | Sus scrofa neuroglobin (NGB), mRNA [NM_001001647]                                                                                                                                                                                                                                                                 |
| A_72_P729538 | RPL6         | 1,1318 | 0,0182 | up   | Sus scrofa ribosomal protein L6 (RPL6), mRNA [NM_001044542]                                                                                                                                                                                                                                                       |
| A_72_P030316 |              | 1,1302 | 0,0155 | up   | Sus scrofa mRNA, clone:UTR010013D09, expressed in uterus. [AK352150]                                                                                                                                                                                                                                              |
| A_72_P433539 | ASB3         | 1,1300 | 0,0120 | up   | Sus scrofa ankyrin repeat and SOCS box containing 3 (ASB3), mRNA [NM_001205042]                                                                                                                                                                                                                                   |
| A_72_P362636 | LOC100153343 | 1,1282 | 0,0193 | up   | RWD domain containing 1 [Source:HGNC Symbol;Acc:20993] [ENSSSCT00000004911]                                                                                                                                                                                                                                       |
| A_72_P774083 |              | 1,1259 | 0,0317 | up   |                                                                                                                                                                                                                                                                                                                   |
| A_72_P147946 | FEM1B        | 1,1245 | 0,0433 | up   | fem-1 homolog b (C. elegans) [Source:HGNC Symbol;Acc:3649] [ENSSSCT00000031923]                                                                                                                                                                                                                                   |
| A_72_P774331 |              | 1,1243 | 0,0452 | up   |                                                                                                                                                                                                                                                                                                                   |
| A_72_P253667 |              | 1,1224 | 0,0149 | up   |                                                                                                                                                                                                                                                                                                                   |
| A_72_P679310 | PITPNB       | 1,1189 | 0,0295 | up   | phosphatidylinositol transfer protein, beta [Source:HGNC Symbol;Acc:9002] [ENSSSCT00000010923]                                                                                                                                                                                                                    |
| A_72_P263042 |              | 1,1159 | 0,0262 | up   | Rep: Sarcoplasmic/endoplasmic reticulum calcium ATPase 1 (EC 3.6.3.8) (Calcium pump 1) (SERCA1) (SR Ca(2+)-ATPase 1) (Calcium-transporting ATPase sarcoplasmic reticulum type, fast twitch skeletal muscle isoform) (Endoplasmic reticulum class 1/2 Ca(2+) ATPase). - Canis familiaris, partial (13%) [TC555343] |
| A_72_P005001 |              | 1,1136 | 0,0327 | up   | ZFP28 zinc finger protein [Source:HGNC Symbol;Acc:17801] [ENSSSCT00000025504]                                                                                                                                                                                                                                     |
| A_72_P362428 |              | 1,1123 | 0,0146 | up   | Rep: Chromosome undetermined SCAF10386, whole genome shotgun sequence - Tetraodon nigroviridis (Green puffer), partial (7%) [TC559328]                                                                                                                                                                            |
| A_72_P323743 | KIAA1522     | 1,1103 | 0,0266 | up   | KIAA1522 [Source:HGNC Symbol;Acc:29301] [ENSSSCT00000022969]                                                                                                                                                                                                                                                      |
| A_72_P386428 |              | 1,1100 | 0,0382 | up   | Rep: Thioredoxin domain-containing protein 1 precursor - Bos taurus (Bovine), partial (31%) [TC546228]                                                                                                                                                                                                            |
| A_72_P661966 | NKAPL        | 1,1075 | 0,0248 | up   | NFKB activating protein-like [Source:HGNC Symbol;Acc:21584] [ENSSSCT00000001303]                                                                                                                                                                                                                                  |
| A_72_P029901 |              | 1,1009 | 0,0372 | up   | Rep: Oncogene tlm - Mus musculus (Mouse), partial (10%) [TC539787]                                                                                                                                                                                                                                                |
| A_72_P706492 |              | 1,1001 | 0,0328 | up   |                                                                                                                                                                                                                                                                                                                   |
| A_72_P290034 | HSPB3        | 3,3826 | 0,0122 | down | Sus scrofa heat shock 27kDa protein 3 (HSPB3), mRNA                                                                                                                                                                                                                                                               |
| A_72_P144946 | LOC100525680 | 2,8864 | 0,0061 | down | Sus scrofa serum amyloid A-2 protein-like (LOC100525680), mRNA                                                                                                                                                                                                                                                    |
| A_72_P164846 |              | 2,5949 | 0,0253 | down | PBL_3_A09 Porcine Brain Library Sus scrofa cDNA clone PBL 5', mRNA sequence                                                                                                                                                                                                                                       |
| A_72_P630178 | CGA          | 2,5578 | 0,0428 | down | Sus scrofa glycoprotein hormones, alpha polypeptide (CGA), transcript variant X1, mRNA                                                                                                                                                                                                                            |
| A_72_P077636 | PDYN         | 2,5462 | 0,0161 | down | Sus scrofa prodynorphin (PDYN), mRNA                                                                                                                                                                                                                                                                              |
| A_72_P181711 |              | 2,5116 | 0,0333 | down | MI-P-CP1-nwf-d-09-0-UI.s1 MI-P-CP1 Sus scrofa cDNA clone MI-P-CP1-nwf-d-09-0-UI 3', mRNA sequence                                                                                                                                                                                                                 |
| A_72_P413428 | LOC100738180 | 2,4598 | 0,0458 | down | Sus scrofa uncharacterized LOC100738180 (LOC100738180), mRNA                                                                                                                                                                                                                                                      |
| A_72_P465435 | PTCHD1       | 2,3707 | 0,0247 | down | Sus scrofa patched domain containing 1 (PTCHD1), mRNA                                                                                                                                                                                                                                                             |
| A_72_P403313 |              | 2,3622 | 0,0467 | down | rje126b_o7.y1 jej Sus scrofa cDNA 5', mRNA sequence                                                                                                                                                                                                                                                               |
| A_72_P077321 | CCL28        | 2,3436 | 0,0314 | down | Sus scrofa chemokine (C-C motif) ligand 28 (CCL28), mRNA                                                                                                                                                                                                                                                          |
| A_72_P577553 | RLN          | 2,3069 | 0,0361 | down | Sus scrofa relaxin (RLN), mRNA                                                                                                                                                                                                                                                                                    |
| A_72_P223367 | RHCG         | 2,2921 | 0,0347 | down | Sus scrofa Rh family, C glycoprotein (RHCG), mRNA                                                                                                                                                                                                                                                                 |
| A_72_P320373 |              | 2,2882 | 0,0264 | down | BP435556 full-length enriched swine cDNA library, adult lung Sus scrofa cDNA clone LNG010031C08 5', mRNA sequence                                                                                                                                                                                                 |
| A_72_P760975 | SAA3         | 2,2733 | 0,0079 | down | Sus scrofa serum amyloid A-3 protein (SAA3), mRNA                                                                                                                                                                                                                                                                 |
| A_72_P165616 | SAA1P        | 2,2615 | 0,0090 | down | Sus scrofa serum serum amyloid A-1 pseudogene (SAA1P) on chromosome 2                                                                                                                                                                                                                                             |
| A_72_P275444 | F13A1        | 2,2590 | 0,0369 | down | Sus scrofa coagulation factor XIII, A1 polypeptide (F13A1), mRNA                                                                                                                                                                                                                                                  |
| A_72_P766152 | LOC733603    | 2,2470 | 0,0078 | down | Sus scrofa serum amyloid A2 (LOC733603), mRNA                                                                                                                                                                                                                                                                     |
| A_72_P060076 | APCS         | 2,2331 | 0,0184 | down | PREDICTED: Sus scrofa amyloid P component, serum (APCS), mRNA                                                                                                                                                                                                                                                     |
| A_72_P441669 | LOC733603    | 2,2204 | 0,0046 | down | Sus scrofa serum amyloid A2 (LOC733603), mRNA                                                                                                                                                                                                                                                                     |
| A_72_P195572 | ALDH1L2      | 2,2146 | 0,0282 | down | Sus scrofa aldehyde dehydrogenase 1 family, member L2 (ALDH1L2), mRNA                                                                                                                                                                                                                                             |
| A_72_P489219 | RHOBTB1      | 2,1773 | 0,0311 | down | Sus scrofa Rho-related BTB domain containing 1 (RHOBTB1), mRNA                                                                                                                                                                                                                                                    |
| A_72_P232367 | CXCL8        | 2,1587 | 0,0251 | down | Sus scrofa chemokine (C-X-C motif) ligand 8 (CXCL8), mRNA                                                                                                                                                                                                                                                         |
| A_72_P322704 | CYP3A46      | 2,1181 | 0,0043 | down | Sus scrofa cytochrome P450 3A46 (CYP3A46), mRNA                                                                                                                                                                                                                                                                   |
| A_72_P164366 |              | 2,0886 | 0,0008 | down | MI-P-CP1-nwr-c-12-0-UI.s1 MI-P-CP1 Sus scrofa cDNA clone MI-P-CP1-nwr-c-12-0-UI 3', mRNA sequence                                                                                                                                                                                                                 |
| A_72_P404993 | RFTN1        | 2,0875 | 0,0080 | down | Sus scrofa raftlin, lipid raft linker 1 (RFTN1), mRNA                                                                                                                                                                                                                                                             |
| A_72_P251027 |              | 2,0839 | 0,0153 | down | 1520831 MARC 3PIG Sus scrofa cDNA 3', mRNA sequence                                                                                                                                                                                                                                                               |
| A_72_P222402 |              | 2,0837 | 0,0265 | down | Sus scrofa mRNA, clone: HTMT10025H08, expressed in hypothalamus                                                                                                                                                                                                                                                   |
| A_72_P444532 | P14ARF       | 2,0700 | 0,0401 | down | Sus scrofa p14ARF protein (P14ARF), mRNA                                                                                                                                                                                                                                                                          |
| A_72_P070401 | CD79A        | 2,0508 | 0,0301 | down | Sus scrofa CD79a molecule, immunoglobulin-associated alpha (CD79A), mRNA                                                                                                                                                                                                                                          |
| A_72_P478841 | DPF3         | 2,0312 | 0,0027 | down | Sus scrofa D4, zinc and double PHD fingers, family 3 (DPF3), mRNA                                                                                                                                                                                                                                                 |
| A_72_P614721 | SDR16C5      | 2,0254 | 0,0079 | down | Sus scrofa short chain dehydrogenase/reductase family 16C, member 5 (SDR16C5), mRNA                                                                                                                                                                                                                               |
| A_72_P381283 | MFAP2        | 2,0230 | 0,0022 | down | Sus scrofa microfibrillar-associated protein 2 (MFAP2), mRNA                                                                                                                                                                                                                                                      |
| A_72_P285314 | POPD3        | 2,0139 | 0,0433 | down | Sus scrofa popeye domain containing 3 (POPD3), mRNA                                                                                                                                                                                                                                                               |
| A_72_P413648 | NOS2         | 2,0080 | 0,0010 | down | Sus scrofa nitric oxide synthase 2, inducible (NOS2), mRNA                                                                                                                                                                                                                                                        |
| A_72_P194302 |              | 1,9974 | 0,0108 | down | UMC-pgvo2-010-h01 pgvo Sus scrofa cDNA 3', mRNA sequence                                                                                                                                                                                                                                                          |
| A_72_P153356 | SLC22A5      | 1,9965 | 0,0168 | down | Sus scrofa solute carrier family 22 (organic cation/carnitine transporter), member 5 (SLC22A5), mRNA                                                                                                                                                                                                              |
| A_72_P107401 | ALG12        | 1,9958 | 0,0399 | down | Sus scrofa ALG12, alpha-1,6-mannosyltransferase (ALG12), mRNA                                                                                                                                                                                                                                                     |
| A_72_P511075 | CHI3L1       | 1,9883 | 0,0094 | down | Sus scrofa chitinase 3-like 1 (cartilage glycoprotein-39) (CHI3L1), mRNA                                                                                                                                                                                                                                          |
| A_72_P443413 | TNFRSF11B    | 1,9866 | 0,0063 | down | Sus scrofa tumor necrosis factor receptor superfamily, member 11b (TNFRSF11B), mRNA                                                                                                                                                                                                                               |
| A_72_P360403 | PTGS1        | 1,9821 | 0,0134 | down | Sus scrofa prostaglandin-endoperoxide synthase 1 (prostaglandin G/H synthase and cyclooxygenase) (PTGS1), mRNA                                                                                                                                                                                                    |

|              |              |        |        |      |                                                                                                                               |
|--------------|--------------|--------|--------|------|-------------------------------------------------------------------------------------------------------------------------------|
| A_72_P065401 |              | 1,9778 | 0,0244 | down | AJ648907 CSEQRAN19 Sus scrofa cDNA clone C0003265_P16, mRNA sequence                                                          |
| A_72_P016761 | C6H1orf87    | 1,9765 | 0,0035 | down | Sus scrofa chromosome 6 open reading frame, human C1orf87 (C6H1orf87), transcript variant X5, mRNA                            |
| A_72_P225652 | BATF3        | 1,9737 | 0,0022 | down | Sus scrofa basic leucine zipper transcription factor, ATF-like 3 (BATF3), mRNA                                                |
| A_72_P602303 | PDLIM3       | 1,9732 | 0,0170 | down | Sus scrofa PDZ and LIM domain 3 (PDLIM3), mRNA                                                                                |
| A_72_P075046 | IL9          | 1,9718 | 0,0334 | down | Sus scrofa interleukin 9 (IL9), mRNA                                                                                          |
| A_72_P379423 |              | 1,9572 | 0,0246 | down | UMC-p4mm3-021-b02 4mm ovarian follicle p4mm Sus scrofa cDNA 3', mRNA sequence                                                 |
| A_72_P326128 | AMCF-II      | 1,9478 | 0,0448 | down | Sus scrofa alveolar macrophage-derived chemotactic factor-II (AMCF-II), mRNA                                                  |
| A_72_P032606 | SERPINB10    | 1,9249 | 0,0200 | down | Sus scrofa serpin peptidase inhibitor, clade B (ovalbumin), member 10 (SERPINB10), mRNA                                       |
| A_72_P212987 |              | 1,9140 | 0,0330 | down | 909449 MARC 4PIG Sus scrofa cDNA 5', mRNA sequence                                                                            |
| A_72_P059201 |              | 1,9123 | 0,0186 | down | MI-P-CP1-nwx-g-03-0-UI.s1 MI-P-CP1 Sus scrofa cDNA clone MI-P-CP1-nwx-g-03-0-UI 3', mRNA sequence                             |
| A_72_P162741 | PTPLA        | 1,9098 | 0,0093 | down | Sus scrofa protein tyrosine phosphatase-like (proline instead of catalytic arginine), member A (PTPLA), mRNA                  |
| A_72_P080101 | TLE4         | 1,9041 | 0,0339 | down | Sus scrofa transducin-like enhancer of split 4 (E(sp1) homolog, Drosophila) (TLE4), mRNA                                      |
| A_72_P424114 | CCNT1        | 1,9029 | 0,0484 | down | Sus scrofa cyclin T1 (CCNT1), mRNA                                                                                            |
| A_72_P169901 |              | 1,9009 | 0,0036 | down | AJ950876 KN404_1 Sus scrofa cDNA clone C0007744f20 5', mRNA sequence                                                          |
| A_72_P088641 | AQP3         | 1,8861 | 0,0330 | down | Sus scrofa aquaporin 3 (Gill blood group) (AQP3), mRNA                                                                        |
| A_72_P075861 | LOC100739146 | 1,8793 | 0,0201 | down | Sus scrofa probable tubulin polyglutamylase TTLTL-like (LOC100739146), partial mRNA                                           |
| A_72_P490025 | SFRP5        | 1,8759 | 0,0359 | down | Sus scrofa secreted frizzled-related protein 5 (SFRP5), mRNA                                                                  |
| A_72_P106541 | YPEL1        | 1,8752 | 0,0180 | down | Sus scrofa yippee-like 1 (Drosophila) (YPEL1), mRNA                                                                           |
| A_72_P260457 |              | 1,8723 | 0,0447 | down | CJ017662 full-length enriched swine cDNA library, adult spleen Sus scrofa cDNA clone SPL01A070052 5', mRNA sequence           |
| A_72_P077336 | PRLR         | 1,8713 | 0,0056 | down | Sus scrofa prolactin receptor (PRLR), mRNA                                                                                    |
| A_72_P232692 | FBP1         | 1,8688 | 0,0319 | down | Sus scrofa fructose-1,6-bisphosphatase 1 (FBP1), mRNA                                                                         |
| A_72_P078151 |              | 1,8674 | 0,0289 | down | BX926728 Sus Scrofa library (scan) Sus scrofa cDNA clone scan0014.o.15 5prim, mRNA sequence                                   |
| A_72_P329118 | C3H2orf40    | 1,8667 | 0,0302 | down | Sus scrofa chromosome 2 open reading frame 40 ortholog (C3H2orf40), mRNA                                                      |
| A_72_P176971 | TNFRSF4      | 1,8630 | 0,0463 | down | Sus scrofa tumor necrosis factor receptor superfamily, member 4 (TNFRSF4), mRNA                                               |
| A_72_P220382 |              | 1,8588 | 0,0349 | down | rhiv15b_i20.y1 hlv Sus scrofa cDNA 5', mRNA sequence                                                                          |
| A_72_P124566 | GDAP1        | 1,8499 | 0,0162 | down | Sus scrofa ganglioside induced differentiation associated protein 1 (GDAP1), mRNA                                             |
| A_72_P124881 |              | 1,8473 | 0,0243 | down | BW967587 full-length enriched swine cDNA library, adult ovary Sus scrofa cDNA clone OVR010093B02 5', mRNA sequence            |
| A_72_P354828 |              | 1,8441 | 0,0161 | down | jns43_D11.f jns Sus scrofa cDNA 5', mRNA sequence                                                                             |
| A_72_P008261 |              | 1,8365 | 0,0138 | down | 230306 MARC 2PIG Sus scrofa cDNA 5', mRNA sequence                                                                            |
| A_72_P248472 | DRAM1        | 1,8363 | 0,0484 | down | Sus scrofa DNA-damage regulated autophagy modulator 1 (DRAM1), mRNA                                                           |
| A_72_P194247 | LOC102167657 | 1,8333 | 0,0436 | down | Sus scrofa uncharacterized LOC102167657 (LOC102167657), misc_RNA                                                              |
| A_72_P078756 | ZNF652       | 1,8296 | 0,0276 | down | Sus scrofa zinc finger protein 652 (ZNF652), mRNA                                                                             |
| A_72_P385148 |              | 1,8277 | 0,0086 | down | PADT0811007_A13R porcine adipose tissue cDNA library (PADT) Sus scrofa cDNA 3', mRNA sequence                                 |
| A_72_P290279 |              | 1,8236 | 0,0373 | down | UMC-pgvo2-010-h01 pgvo Sus scrofa cDNA 3', mRNA sequence                                                                      |
| A_72_P442067 | OCT1         | 1,8164 | 0,0036 | down | Sus scrofa organic cation transporter 1 (OCT1), mRNA                                                                          |
| A_72_P444306 | LOC100152327 | 1,8104 | 0,0224 | down | Sus scrofa immunoglobulin lambda-like polypeptide 5 (LOC100152327), mRNA                                                      |
| A_72_P706576 | FAM53B       | 1,8092 | 0,0386 | down | Sus scrofa family with sequence similarity 53, member B (FAM53B), mRNA                                                        |
| A_72_P306173 | LOC100621891 | 1,8086 | 0,0475 | down | Sus scrofa uncharacterized LOC100621891 (LOC100621891), misc_RNA                                                              |
| A_72_P271869 |              | 1,7970 | 0,0386 | down | 800075 MARC 3PIG Sus scrofa cDNA 3', mRNA sequence                                                                            |
| A_72_P333748 |              | 1,7951 | 0,0023 | down | 1512897 MARC 3PIG Sus scrofa cDNA 3', mRNA sequence                                                                           |
| A_72_P381653 | CHD3         | 1,7946 | 0,0174 | down | Sus scrofa chromodomain helicase DNA binding protein 3 (CHD3), mRNA                                                           |
| A_72_P440611 | ANGPTL7      | 1,7945 | 0,0436 | down | Sus scrofa angiopoietin-like 7 (ANGPTL7), mRNA                                                                                |
| A_72_P275359 |              | 1,7905 | 0,0303 | down | Sus scrofa mRNA, clone:THY010074F05, expressed in thymus                                                                      |
| A_72_P442989 | SLC35D1      | 1,7866 | 0,0205 | down | Sus scrofa solute carrier family 35 (UDP-glucuronic acid/UDP-N-acetylglucosamine dual transporter), member D1 (SLC35D1), mRNA |
| A_72_P067721 |              | 1,7854 | 0,0296 | down | AJ649189 CSEQRAN19 Sus scrofa cDNA clone C0003271_M21, mRNA sequence                                                          |
| A_72_P442714 | TXNRD1       | 1,7844 | 0,0143 | down | Sus scrofa thioredoxin reductase 1 (TXNRD1), mRNA                                                                             |
| A_72_P078426 | LOC102166799 | 1,7801 | 0,0164 | down | Sus scrofa uncharacterized LOC102166799 (LOC102166799), misc_RNA                                                              |
| A_72_P008421 |              | 1,7731 | 0,0385 | down | Sus scrofa mRNA, clone:THY010065B08, expressed in thymus                                                                      |
| A_72_P516390 |              | 1,7693 | 0,0035 | down | rcad05b_d10.y1 cag Sus scrofa cDNA 5', mRNA sequence                                                                          |
| A_72_P232192 | TNFR2        | 1,7691 | 0,0107 | down | Sus scrofa tumor necrosis factor receptor 2 (TNFR2) mRNA, complete cds                                                        |
| A_72_P317938 | SLC4A9       | 1,7660 | 0,0161 | down | Sus scrofa solute carrier family 4, sodium bicarbonate cotransporter, member 9 (SLC4A9), mRNA                                 |
| A_72_P271704 | FREM1        | 1,7626 | 0,0016 | down | Sus scrofa FRAS1 related extracellular matrix 1 (FREM1), mRNA                                                                 |
| A_72_P736997 | ACTA1        | 1,7597 | 0,0478 | down | Sus scrofa actin, alpha 1, skeletal muscle (ACTA1), mRNA                                                                      |
| A_72_P101791 |              | 1,7580 | 0,0073 | down | Sus scrofa mRNA, clone:SKNB10031H12, expressed in skin                                                                        |
| A_72_P364398 | DIAPH1       | 1,7574 | 0,0038 | down | Sus scrofa diaphanous homolog 1 (Drosophila) (DIAPH1), mRNA                                                                   |
| A_72_P373988 |              | 1,7563 | 0,0449 | down | 998373 MARC 4PIG Sus scrofa cDNA 3', mRNA sequence                                                                            |
| A_72_P516452 | PYGM         | 1,7512 | 0,0001 | down | Sus scrofa phosphorylase, glycogen, muscle (PYGM), mRNA                                                                       |
| A_72_P470999 | CLASP1       | 1,7511 | 0,0455 | down | Sus scrofa cytoplasmic linker associated protein 1 (CLASP1), mRNA                                                             |
| A_72_P204422 | KPNA7        | 1,7489 | 0,0087 | down | Sus scrofa karyopherin alpha 7 (importin alpha 8) (KPNA7), mRNA                                                               |
| A_72_P300259 |              | 1,7301 | 0,0328 | down | BX923227 Sus Scrofa library (scan) Sus scrofa cDNA clone scan0024.n.16 5prim, mRNA sequence                                   |
| A_72_P608487 | HIPK1        | 1,7288 | 0,0371 | down | Sus scrofa homeodomain interacting protein kinase 1 (HIPK1), tmRNA                                                            |
| A_72_P425089 | LOC100621782 | 1,7271 | 0,0421 | down | Sus scrofa tripartite motif-containing protein 60-like (LOC100621782), mRNA                                                   |
| A_72_P132711 | LOC100523712 | 1,7248 | 0,0492 | down | Sus scrofa E3 ubiquitin-protein ligase TRIM32-like (LOC100523712), misc_RNA                                                   |
| A_72_P336828 | ABCG8        | 1,7246 | 0,0256 | down | Sus scrofa ATP-binding cassette, sub-family G (WHITE), member 8 (ABCG8), mRNA                                                 |
| A_72_P443272 | ACSL1        | 1,7218 | 0,0218 | down | Sus scrofa acyl-CoA synthetase long-chain family member 1 (ACSL1), mRNA                                                       |
| A_72_P352143 | C3H16orf54   | 1,7178 | 0,0133 | down | Sus scrofa chromosome 3 open reading frame, human C16orf54 (C3H16orf54), mRNA                                                 |

|              |              |        |        |      |                                                                                                                    |
|--------------|--------------|--------|--------|------|--------------------------------------------------------------------------------------------------------------------|
| A_72_P339448 |              | 1,7174 | 0,0052 | down | AJ939468 CSEQRAN17 Sus scrofa cDNA clone C0007316g13 3', mRNA sequence                                             |
| A_72_P201752 | RSPH3        | 1,7073 | 0,0350 | down | Sus scrofa radial spoke 3 homolog (Chlamydomonas) (RSPH3), partial mRNA                                            |
| A_72_P444398 | SLC22A3      | 1,7061 | 0,0341 | down | Sus scrofa solute carrier family 22 (extraneuronal monoamine transporter), member 3 (SLC22A3), mRNA                |
| A_72_P392133 | FBXL4        | 1,7058 | 0,0106 | down | Sus scrofa F-box and leucine-rich repeat protein 4 (FBXL4), mRNA                                                   |
| A_72_P274354 | SYNM         | 1,7050 | 0,0076 | down | Sus scrofa synemin, intermediate filament protein (SYNM), mRNA                                                     |
| A_72_P281634 | JAM3         | 1,7029 | 0,0112 | down | Sus scrofa junctional adhesion molecule 3 (JAM3), mRNA                                                             |
| A_72_P031841 |              | 1,7026 | 0,0040 | down | Pig DNA sequence from clone CH242-196N13 on chromosome 7, complete sequence                                        |
| A_72_P463511 | IL1b         | 1,7012 | 0,0313 | down | Sus scrofa interleukin-1 beta (IL-1beta), mRNA                                                                     |
| A_72_P411833 | SAMD4A       | 1,7004 | 0,0322 | down | PREDICTED: Sus scrofa sterile alpha motif domain containing 4A (SAMD4A), transcript variant X3, mRNA               |
| A_72_P010351 | KLHL5        | 1,6960 | 0,0351 | down | Sus scrofa kelch-like family member 5 (KLHL5), mRNA                                                                |
| A_72_P357108 |              | 1,6947 | 0,0402 | down | Sus scrofa mRNA, clone: KDN010079F01, expressed in kidney.                                                         |
| A_72_P414318 | HHEX         | 1,6892 | 0,0143 | down | Sus scrofa hematopoietically expressed homeobox (HHEX), mRNA                                                       |
| A_72_P488884 | KLHL22       | 1,6868 | 0,0367 | down | Sus scrofa kelch-like family member 22 (KLHL22), mRNA                                                              |
| A_72_P272274 |              | 1,6866 | 0,0398 | down | BP441774 full-length enriched swine cDNA library, adult liver Sus scrofa cDNA clone LVR010081A11 5', mRNA sequence |
| A_72_P076086 | LOC100524097 | 1,6865 | 0,0098 | down | Sus scrofa uncharacterized LOC100524097 (LOC100524097), mRNA                                                       |
| A_72_P021631 | CD226        | 1,6844 | 0,0332 | down | PREDICTED: Sus scrofa CD226 molecule (CD226), mRNA                                                                 |
| A_72_P088816 | PAG6         | 1,6838 | 0,0257 | down | Sus scrofa pregnancy-associated glycoprotein 6 (PAG6), mRNA                                                        |
| A_72_P240922 |              | 1,6837 | 0,0381 | down | UMC-puu05-003-b05 5' Library puu0 Sus scrofa cDNA 5', mRNA sequence                                                |
| A_72_P063896 | LOC100625296 | 1,6829 | 0,0444 | down | Sus scrofa neurofilament heavy polypeptide-like (LOC100625296), misc_RNA                                           |
| A_72_P472481 | EPHA4        | 1,6818 | 0,0170 | down | Sus scrofa EPH receptor A4 (EPHA4), mRNA                                                                           |
| A_72_P418639 |              | 1,6785 | 0,0392 | down | 1138874 MARC 4PIG Sus scrofa cDNA 3', mRNA sequence                                                                |
| A_72_P078706 | FKBP5        | 1,6740 | 0,0398 | down | Sus scrofa FK506 binding protein 5 (FKBP5), mRNA                                                                   |
| A_72_P241652 | DPF3         | 1,6714 | 0,0240 | down | PREDICTED: Sus scrofa D4, zinc and double PHD fingers, family 3 (DPF3), mRNA                                       |
| A_72_P312773 |              | 1,6685 | 0,0202 | down | 122997 MARC 1PIG Sus scrofa cDNA 5', mRNA sequence                                                                 |
| A_72_P145816 |              | 1,6649 | 0,0115 | down | 1516043 MARC 3PIG Sus scrofa cDNA 5', mRNA sequence                                                                |
| A_72_P286759 | EIF2C1       | 1,6648 | 0,0164 | down | Sus scrofa eukaryotic translation initiation factor 2C, 1 (EIF2C1), mRNA                                           |
| A_72_P536730 | NQO1         | 1,6641 | 0,0295 | down | Sus scrofa NAD(P)H dehydrogenase, quinone 1 (NQO1), mRNA                                                           |
| A_72_P053626 |              | 1,6633 | 0,0173 | down | risp33_g5.y1 isp Sus scrofa cDNA 5', mRNA sequence                                                                 |
| A_72_P318948 |              | 1,6613 | 0,0440 | down | rmed06c_k2.y1 med Sus scrofa cDNA 5', mRNA sequence                                                                |
| A_72_P178976 | MARCKS       | 1,6601 | 0,0184 | down | Sus scrofa myristoylated alanine-rich protein kinase C substrate (MARCKS), mRNA                                    |
| A_72_P232632 | PROC         | 1,6574 | 0,0103 | down | Sus scrofa protein C (inactivator of coagulation factors Va and VIIIa) (PROC), mRNA                                |
| A_72_P055166 | TMEM67       | 1,6546 | 0,0199 | down | Sus scrofa transmembrane protein 67 (TMEM67), mRNA                                                                 |
| A_72_P189551 | DDX46        | 1,6508 | 0,0395 | down | Sus scrofa DEAD (Asp-Glu-Ala-Asp) box polypeptide 46 (DDX46), mRNA                                                 |
| A_72_P425299 |              | 1,6500 | 0,0499 | down | UMC-p4civv1-010-g01 4-Cell-Embryo-(invivo) p4civv Sus scrofa cDNA 3', mRNA sequence                                |
| A_72_P035541 | CASP1        | 1,6476 | 0,0067 | down | Sus scrofa caspase 1, apoptosis-related cysteine peptidase (CASP1), mRNA                                           |
| A_72_P223332 | CCL4         | 1,6475 | 0,0144 | down | Sus scrofa chemokine (C-C motif) ligand 4 (CCL4), mRNA                                                             |
| A_72_P597409 |              | 1,6463 | 0,0463 | down | Sus scrofa mRNA, clone: OVR010040D04, expressed in ovary.                                                          |
| A_72_P172528 | FAM65B       | 1,6459 | 0,0042 | down | Sus scrofa family with sequence similarity 65, member B (FAM65B), mRNA                                             |
| A_72_P610794 |              | 1,6447 | 0,0467 | down | Sus scrofa mRNA, clone:OVR010066H07, expressed in ovary                                                            |
| A_72_P140581 | RGS14        | 1,6425 | 0,0296 | down | Sus scrofa regulator of G-protein signaling 14 (RGS14), mRNA                                                       |
| A_72_P302739 | ADRA2B       | 1,6425 | 0,0351 | down | Sus scrofa adrenoceptor alpha 2B (ADRA2B), mRNA                                                                    |
| A_72_P335903 |              | 1,6424 | 0,0228 | down | MI-P-NA-aet-h-10-1-UM.s1 MI-P-NA Sus scrofa cDNA clone MI-P-NA-aet-h-10-1-UM 3', mRNA sequence                     |
| A_72_P061851 |              | 1,6392 | 0,0066 | down | 1515849 MARC 3PIG Sus scrofa cDNA 5', mRNA sequence                                                                |
| A_72_P698600 | RNF111       | 1,6388 | 0,0460 | down | Sus scrofa ring finger protein 111 (RNF111), mRNA                                                                  |
| A_72_P674232 | NCOA4        | 1,6385 | 0,0052 | down | Sus scrofa nuclear receptor coactivator 4 (NCOA4), mRNA                                                            |
| A_72_P403188 | RPS27        | 1,6368 | 0,0403 | down | PREDICTED: Sus scrofa ribosomal protein S27 (RPS27), mRNA                                                          |
| A_72_P761755 |              | 1,6363 | 0,0137 | down | rhy09c_f20.y1 hyp Sus scrofa cDNA 5', mRNA sequence                                                                |
| A_72_P232232 | PIK3R5       | 1,6348 | 0,0161 | down | Sus scrofa phosphoinositide-3-kinase, regulatory subunit 5 (PIK3R5), mRNA                                          |
| A_72_P257987 | LOC100517569 | 1,6347 | 0,0478 | down | Sus scrofa lysine-specific demethylase 4C-like (LOC100517569), misc_RNA                                            |
| A_72_P633564 | RAI14        | 1,6344 | 0,0156 | down | Sus scrofa retinoic acid induced 14 (RAI14), mRNA                                                                  |
| A_72_P706415 | LOC100739291 | 1,6316 | 0,0233 | down | Sus scrofa myosin light chain kinase, smooth muscle-like (LOC100739291), mRNA                                      |
| A_72_P518459 | RN18S        | 1,6307 | 0,0316 | down | Sus scrofa 18S ribosomal RNA gene, complete sequence                                                               |
| A_72_P099401 |              | 1,6287 | 0,0345 | down | AJ963622 KN404_2 Sus scrofa cDNA clone C0007756e22 3', mRNA sequence                                               |
| A_72_P304694 |              | 1,6274 | 0,0393 | down | 1121923 MARC 4PIG Sus scrofa cDNA 3', mRNA sequence                                                                |
| A_72_P379243 |              | 1,6257 | 0,0477 | down | FS657729 full-length enriched swine cDNA library, adult colon Sus scrofa cDNA clone CLNT10009A06 5', mRNA sequence |
| A_72_P057471 | DNAJA4       | 1,6245 | 0,0185 | down | Sus scrofa DnaJ (Hsp40) homolog, subfamily A, member 4 (DNAJA4), mRNA                                              |
| A_72_P632736 | LOC100294636 | 1,6240 | 0,0418 | down | Sus scrofa RIIa domain-containing protein (LOC100294636), mRNA                                                     |
| A_72_P197812 |              | 1,6237 | 0,0100 | down | AJ943557 CSEQRAN17 Sus scrofa cDNA clone C0007303g06 5', mRNA sequence                                             |
| A_72_P442262 | INHBA        | 1,6208 | 0,0496 | down | Sus scrofa inhibin, beta A (INHBA), mRNA                                                                           |
| A_72_P407208 | DYNC1H1      | 1,6192 | 0,0055 | down | Sus scrofa dynein, cytoplasmic 1, heavy chain 1 (DYNC1H1), mRNA                                                    |
| A_72_P237312 | ADAM-9       | 1,6188 | 0,0202 | down | Sus scrofa cellular disintegrin precursor (ADAM-9), mRNA                                                           |
| A_72_P178081 | IFNGR2       | 1,6183 | 0,0229 | down | Sus scrofa interferon gamma receptor 2 (interferon gamma transducer 1) (IFNGR2), mRNA                              |
| A_72_P372243 | EPHA4        | 1,6169 | 0,0129 | down | Sus scrofa EPH receptor A4 (EPHA4), mRNA                                                                           |
| A_72_P169416 |              | 1,6149 | 0,0134 | down | AJ947875 KN404_1 Sus scrofa cDNA clone C0007735e23 5', mRNA sequence                                               |
| A_72_P176206 | KLKB1        | 1,6121 | 0,0499 | down | Sus scrofa kallikrein B, plasma (Fletcher factor) 1 (KLKB1), mRNA                                                  |
| A_72_P274979 |              | 1,6119 | 0,0179 | down | 1553931 MARC 3PIG Sus scrofa cDNA 3', mRNA sequence                                                                |
| A_72_P000071 |              | 1,6098 | 0,0350 | down | 806105 MARC 3PIG Sus scrofa cDNA 5', mRNA sequence                                                                 |
| A_72_P499175 |              | 1,6097 | 0,0246 | down | AR037D10PBC30BD10S Porcine Peripheral Blood Cell cDNA library, Cot 30 Sus scrofa cDNA, mRNA sequence               |
| A_72_P179546 | KLF11        | 1,6097 | 0,0136 | down | Sus scrofa Kruppel-like factor 11 (KLF11), mRNA                                                                    |
| A_72_P567124 | POLG         | 1,6075 | 0,0427 | down | Sus scrofa polymerase (DNA directed), gamma (POLG), mRNA                                                           |
| A_72_P219427 | PIH1D3       | 1,6072 | 0,0004 | down | Sus scrofa PIH1 domain containing 3 (PIH1D3), mRNA                                                                 |
| A_72_P414548 | LYVE1        | 1,6072 | 0,0468 | down | Sus scrofa lymphatic vessel endothelial hyaluronan receptor 1 (LYVE1), mRNA                                        |
| A_72_P327498 | STXBP1       | 1,6067 | 0,0393 | down | Sus scrofa syntaxin binding protein 1 (STXBP1), mRNA                                                               |
| A_72_P263047 | DZIP1        | 1,6047 | 0,0202 | down | Sus scrofa DAZ interacting zinc finger protein 1 (DZIP1), mRNA                                                     |

|              |              |        |        |      |                                                                                                                      |
|--------------|--------------|--------|--------|------|----------------------------------------------------------------------------------------------------------------------|
| A_72_P271269 |              | 1,6033 | 0,0113 | down | rpigcf0_016227.y1 ctf Sus scrofa cDNA 5', mRNA sequence                                                              |
| A_72_P381078 | SSH1         | 1,6029 | 0,0028 | down | Sus scrofa slingshot protein phosphatase 1 (SSH1), mRNA                                                              |
| A_72_P170361 | ZO1          | 1,6024 | 0,0139 | down | Sus scrofa zonula occludens 1 (ZO1), mRNA                                                                            |
| A_72_P165846 | NFKBIA       | 1,5980 | 0,0425 | down | Sus scrofa nuclear factor of kappa light polypeptide gene enhancer in B-cells inhibitor, alpha (NFKBIA), mRNA        |
| A_72_P295144 |              | 1,5976 | 0,0032 | down | 893832 MARC 4PIG Sus scrofa cDNA 5', mRNA sequence                                                                   |
| A_72_P010651 | PMFBP1       | 1,5933 | 0,0273 | down | Sus scrofa polyamine modulated factor 1 binding protein 1 (PMFBP1), mRNA                                             |
| A_72_P026476 | TPK1         | 1,5932 | 0,0358 | down | Sus scrofa thiamin pyrophosphokinase 1 (TPK1), mRNA                                                                  |
| A_72_P121686 | SCFD2        | 1,5927 | 0,0444 | down | Sus scrofa sec1 family domain containing 2 (SCFD2), mRNA                                                             |
| A_72_P218312 | SOCs1        | 1,5919 | 0,0133 | down | Sus scrofa suppressor of cytokine signaling 1 (SOCs1), mRNA                                                          |
| A_72_P251567 | TCP11L2      | 1,5912 | 0,0039 | down | Sus scrofa t-complex 11, testis-specific-like 2 (TCP11L2), mRNA                                                      |
| A_72_P478123 | CEBPE        | 1,5911 | 0,0202 | down | Sus scrofa CCAAT/enhancer binding protein (C/EBP), epsilon (CEBPE), mRNA                                             |
| A_72_P423619 | SLC6A1       | 1,5909 | 0,0461 | down | Sus scrofa solute carrier family 6 (neurotransmitter transporter), member 1 (SLC6A1), mRNA                           |
| A_72_P316818 | FADS2        | 1,5908 | 0,0264 | down | Sus scrofa fatty acid desaturase 2 (FADS2), mRNA                                                                     |
| A_72_P108641 |              | 1,5902 | 0,0427 | down | BP463763 full-length enriched swine cDNA library, adult uterus Sus scrofa cDNA clone UTR010058D10 5', mRNA sequence  |
| A_72_P117871 |              | 1,5886 | 0,0251 | down | jns39_A04.f jns Sus scrofa cDNA 5', mRNA sequence                                                                    |
| A_72_P224942 |              | 1,5881 | 0,0416 | down | BX665628 Sus Scrofa library (scag) Sus scrofa cDNA clone scag0007.g.07 5prim, mRNA sequence                          |
| A_72_P612772 | PHLPP1       | 1,5872 | 0,0089 | down | Sus scrofa PH domain and leucine rich repeat protein phosphatase 1 (PHLPP1), mRNA                                    |
| A_72_P710798 | LOC100158011 | 1,5871 | 0,0024 | down | Sus scrofa pancreatic trypsin inhibitor-like (LOC100158011), transcript variant 1, mRNA                              |
| A_72_P034196 | SMAP2        | 1,5854 | 0,0034 | down | Sus scrofa small ArfGAP2 (SMAP2), mRNA                                                                               |
| A_72_P034506 |              | 1,5850 | 0,0317 | down | Sus scrofa mRNA, clone:ADRO10069G10, expressed in adrenal gland.                                                     |
| A_72_P444408 | IGF2R        | 1,5848 | 0,0337 | down | Sus scrofa insulin-like growth factor 2 receptor (IGF2R), mRNA                                                       |
| A_72_P427111 | APLP2        | 1,5840 | 0,0034 | down | Sus scrofa amyloid beta (A4) precursor-like protein 2 (APLP2), mRNA                                                  |
| A_72_P762749 | MBP          | 1,5836 | 0,0162 | down | Sus scrofa myelin basic protein (MBP), mRNA                                                                          |
| A_72_P006351 | SSH2         | 1,5835 | 0,0430 | down | Sus scrofa slingshot protein phosphatase 2 (SSH2), partial mRNA                                                      |
| A_72_P362608 |              | 1,5822 | 0,0239 | down | 376287 MARC 2PIG Sus scrofa cDNA 5', mRNA sequence                                                                   |
| A_72_P056591 |              | 1,5817 | 0,0464 | down | 856551 MARC 4PIG Sus scrofa cDNA 3', mRNA sequence                                                                   |
| A_72_P320813 | TNFAIP3      | 1,5813 | 0,0404 | down | Sus scrofa tumor necrosis factor, alpha-induced protein 3 (TNFAIP3), mRNA                                            |
| A_72_P237542 | ATL3         | 1,5805 | 0,0039 | down | Sus scrofa atlastin GTPase 3 (ATL3), mRNA                                                                            |
| A_72_P730317 |              | 1,5790 | 0,0040 | down | Sus scrofa mRNA, clone:LNG010007F06, expressed in lung.                                                              |
| A_72_P114516 |              | 1,5786 | 0,0222 | down | Sus scrofa pSNORD3 cluster snoRNA, complete sequence                                                                 |
| A_72_P336133 | CDC25C       | 1,5777 | 0,0124 | down | Sus scrofa cell division cycle 25 homolog C (S. pombe) (CDC25C), mRNA                                                |
| A_72_P404923 |              | 1,5756 | 0,0460 | down | 921266 MARC 4PIG Sus scrofa cDNA 3', mRNA sequence                                                                   |
| A_72_P478646 | MCTP2        | 1,5733 | 0,0045 | down | Sus scrofa multiple C2 domains, transmembrane 2 (MCTP2), mRNA                                                        |
| A_72_P040846 |              | 1,5718 | 0,0333 | down | 805259 MARC 3PIG Sus scrofa cDNA 5', mRNA sequence                                                                   |
| A_72_P300294 | ZNF576       | 1,5713 | 0,0112 | down | Sus scrofa zinc finger protein 576 (ZNF576), mRNA                                                                    |
| A_72_P453249 | ATP4B        | 1,5710 | 0,0412 | down | Sus scrofa ATPase, H+/K+ exchanging, beta polypeptide (ATP4B), mRNA                                                  |
| A_72_P106471 | LOC100518000 | 1,5671 | 0,0170 | down | PREDICTED: Sus scrofa nuclear envelope pore membrane protein POM 121-like (LOC100518000), mRNA                       |
| A_72_P034901 |              | 1,5649 | 0,0331 | down | Sus scrofa mRNA, clone:PTG010071D08, expressed in pituitary gland                                                    |
| A_72_P477135 | LOC100738047 | 1,5639 | 0,0375 | down | Sus scrofa trem-like transcript 2 protein-like (LOC100738047), mRNA                                                  |
| A_72_P394248 | TFAP2A       | 1,5634 | 0,0488 | down | Sus scrofa transcription factor AP-2 alpha (activating enhancer binding protein 2 alpha) (TFAP2A), mRNA              |
| A_72_P322783 |              | 1,5633 | 0,0094 | down | Sus scrofa mRNA, clone:OVRM10116D09, expressed in ovary                                                              |
| A_72_P367488 |              | 1,5592 | 0,0499 | down | 1562924 MARC 3PIG Sus scrofa cDNA 5', mRNA sequence                                                                  |
| A_72_P486627 | MASP1        | 1,5569 | 0,0385 | down | Sus scrofa mannan-binding lectin serine peptidase 1 (C4/C2 activating component of Ra-reactive factor) (MASP1), mRNA |
| A_72_P083911 | KANSL1L      | 1,5558 | 0,0473 | down | Sus scrofa KAT8 regulatory NSL complex subunit 1-like (KANSL1L), mRNA                                                |
| A_72_P382248 | LOC100156775 | 1,5554 | 0,0450 | down | Sus scrofa solute carrier family 7 member 13-like (LOC100156775), mRNA                                               |
| A_72_P075961 | MTMR9        | 1,5548 | 0,0394 | down | Sus scrofa myotubularin related protein 9 (MTMR9), mRNA                                                              |
| A_72_P405188 |              | 1,5542 | 0,0053 | down | AJ669547 CSEQRAN09 Sus scrofa cDNA clone C000001059_N02, mRNA sequence                                               |
| A_72_P401243 | TMEM106C     | 1,5529 | 0,0260 | down | Sus scrofa transmembrane protein 106C (TMEM106C), mRNA                                                               |
| A_72_P567564 | CKM          | 1,5518 | 0,0365 | down | Sus scrofa creatine kinase, muscle (CKM), mRNA                                                                       |
| A_72_P304274 | CLIC5        | 1,5513 | 0,0222 | down | Sus scrofa chloride intracellular channel 5 (CLIC5), misc_RNA                                                        |
| A_72_P411188 | ENPP4        | 1,5513 | 0,0297 | down | Sus scrofa ectonucleotide pyrophosphatase/phosphodiesterase 4 (putative) (ENPP4), mRNA                               |
| A_72_P327188 |              | 1,5504 | 0,0418 | down | Select seq gb EW502890.2                                                                                             |
| A_72_P327028 | DYRK3        | 1,5503 | 0,0168 | down | PREDICTED: Sus scrofa dual-specificity tyrosine-(Y)-phosphorylation regulated kinase 3 (DYRK3), partial mRNA         |
| A_72_P763028 |              | 1,5502 | 0,0137 | down | Chain 5, Structure Of The Idle Mammalian Ribosome-sec61 Complex. This Entry Contains The Large Subunit Ribosomal Rna |
| A_72_P083666 |              | 1,5482 | 0,0432 | down | 1497603 MARC 3PIG Sus scrofa cDNA 5', mRNA sequence                                                                  |
| A_72_P077231 | CDC42BPA     | 1,5476 | 0,0020 | down | Sus scrofa CDC42 binding protein kinase alpha (DMPK-like) (CDC42BPA), mRNA                                           |
| A_72_P364933 |              | 1,5457 | 0,0119 | down | Sus scrofa mRNA, clone:THY010051H11, expressed in thymus                                                             |
| A_72_P115851 | EIF4G3       | 1,5453 | 0,0050 | down | PREDICTED: Sus scrofa eukaryotic translation initiation factor 4 gamma, 3 (EIF4G3), mRNA                             |
| A_72_P165956 | PTPRU        | 1,5449 | 0,0328 | down | Sus scrofa protein tyrosine phosphatase, receptor type, U (PTPRU), mRNA                                              |
| A_72_P200472 | LYZL1        | 1,5446 | 0,0429 | down | Sus scrofa lysozyme-like 1 (LYZL1), mRNA                                                                             |
| A_72_P374828 |              | 1,5439 | 0,0133 | down | 1539113 MARC 3PIG Sus scrofa cDNA 3', mRNA sequence                                                                  |
| A_72_P265902 |              | 1,5418 | 0,0115 | down | UMC-p4mm3-019-e10 4mm ovarian follicle p4mm Sus scrofa cDNA 3', mRNA sequence                                        |
| A_72_P264457 | SPATA18      | 1,5409 | 0,0066 | down | Sus scrofa spermatogenesis associated 18 (SPATA18), mRNA                                                             |
| A_72_P062611 |              | 1,5404 | 0,0227 | down | rckl09_g11.y1 cki Sus scrofa cDNA 5', mRNA sequence                                                                  |
| A_72_P069541 | RASGEF1B     | 1,5399 | 0,0015 | down | RasGEF domain family, member 1B [Source:HGNC Symbol;Acc:24881] [ENSSSCT00000026377]                                  |
| A_72_P705754 |              | 1,5394 | 0,0494 | down |                                                                                                                      |
| A_72_P258467 | IL24         | 1,5388 | 0,0373 | down | Sus scrofa interleukin 24 (IL24), mRNA                                                                               |
| A_72_P429264 | KIF1B        | 1,5366 | 0,0122 | down | Sus scrofa kinesin family member 1B (KIF1B), mRNA                                                                    |
| A_72_P013161 |              | 1,5301 | 0,0249 | down | PDUts2021G04 Porcine testis cDNA library II Sus scrofa cDNA clone PDUts2021G04 5', mRNA sequence                     |
| A_72_P426224 | MED17        | 1,5295 | 0,0003 | down | Sus scrofa mediator complex subunit 17 (MED17), mRNA                                                                 |
| A_72_P311618 |              | 1,5265 | 0,0416 | down | BX674626 Sus Scrofa library (scac) Sus scrofa cDNA clone scac0044.i.21 5prim, mRNA sequence                          |
| A_72_P078796 |              | 1,5250 | 0,0444 | down | 1541586 MARC 3PIG Sus scrofa cDNA 3', mRNA sequence                                                                  |
| A_72_P443584 | ATXN1        | 1,5239 | 0,0347 | down | Sus scrofa ataxin 1 (ATXN1), mRNA                                                                                    |

|              |              |        |        |      |                                                                                                                                                                                                            |
|--------------|--------------|--------|--------|------|------------------------------------------------------------------------------------------------------------------------------------------------------------------------------------------------------------|
| A_72_P151466 |              | 1,5239 | 0,0160 | down | BX923970 Sus Scrofa library (scan) Sus scrofa cDNA clone scan0015.o.10 5prim, mRNA sequence                                                                                                                |
| A_72_P368448 | CFP          | 1,5232 | 0,0394 | down | Sus scrofa complement factor properdin (CFP), mRNA                                                                                                                                                         |
| A_72_P407843 | AMPD3        | 1,5230 | 0,0368 | down | Sus scrofa adenosine monophosphate deaminase 3 (AMPD3), mRNA                                                                                                                                               |
| A_72_P636073 | CTSK         | 1,5215 | 0,0118 | down | Sus scrofa cathepsin K (CTSK), mRNA                                                                                                                                                                        |
| A_72_P673137 | BCCIP        | 1,5188 | 0,0244 | down | Sus scrofa BRCA2 and CDKN1A interacting protein (BCCIP), mRNA                                                                                                                                              |
| A_72_P168901 |              | 1,5182 | 0,0475 | down | 1110540 MARC 4PIG Sus scrofa cDNA 3', mRNA sequence                                                                                                                                                        |
| A_72_P260252 | SIT1         | 1,5180 | 0,0389 | down | Sus scrofa signaling threshold regulating transmembrane adaptor 1 (SIT1), mRNA                                                                                                                             |
| A_72_P225962 | APTX         | 1,5164 | 0,0292 | down | Sus scrofa aprataxin (APTX), mRNA                                                                                                                                                                          |
| A_72_P486262 | ZIC1         | 1,5159 | 0,0190 | down | Sus scrofa Zic family member 1 (ZIC1), mRNA                                                                                                                                                                |
| A_72_P010366 | LOC100736836 | 1,5150 | 0,0283 | down | Sus scrofa mixed lineage kinase domain-like protein-like (LOC100736836), mRNA                                                                                                                              |
| A_72_P516237 | LOC106505672 | 1,5143 | 0,0041 | down | PREDICTED: Sus scrofa interleukin-1 receptor-associated kinase-like 2 (LOC106505672), mRNA                                                                                                                 |
| A_72_P107786 | TLN1         | 1,5142 | 0,0313 | down | Sus scrofa talin 1 (TLN1), mRNA                                                                                                                                                                            |
| A_72_P320963 | LOC100738358 | 1,5140 | 0,0492 | down | Sus scrofa V-set and immunoglobulin domain-containing protein 4-like (LOC100738358), mRNA                                                                                                                  |
| A_72_P478994 | C7H14orf118  | 1,5114 | 0,0135 | down | Sus scrofa uncharacterized protein C14orf118-like (C7H14orf118), mRNA                                                                                                                                      |
| A_72_P443556 | LRR8C8       | 1,5108 | 0,0256 | down | Sus scrofa leucine rich repeat containing 8 family, member C (LRR8C8), mRNA                                                                                                                                |
| A_72_P381373 | RPS6KA3      | 1,5076 | 0,0241 | down | Sus scrofa ribosomal protein S6 kinase, 90kDa, polypeptide 3 (RPS6KA3), mRNA                                                                                                                               |
| A_72_P655258 | CHSY1        | 1,5072 | 0,0210 | down | Sus scrofa chondroitin sulfate synthase 1 (CHSY1), mRNA                                                                                                                                                    |
| A_72_P231642 |              | 1,5059 | 0,0130 | down | AJ960631 KN404_2 Sus scrofa cDNA clone C0007759n14 5', mRNA sequence                                                                                                                                       |
| A_72_P140936 |              | 1,5052 | 0,0060 | down | rcje12_a8.y1 cje Sus scrofa cDNA 5', mRNA sequence                                                                                                                                                         |
| A_72_P600573 | CA3          | 1,5047 | 0,0443 | down | Sus scrofa carbonic anhydrase III, muscle specific (CA3), mRNA                                                                                                                                             |
| A_72_P476416 | LOC100154071 | 1,5022 | 0,0472 | down | Sus scrofa uncharacterized LOC100154071 (LOC100154071), mRNA                                                                                                                                               |
| A_72_P426394 | MID1IP1      | 1,5016 | 0,0152 | down | PREDICTED: Sus scrofa MID1 interacting protein 1 (MID1IP1), transcript variant X1, mRNA                                                                                                                    |
| A_72_P256402 | LOC100624199 | 1,5014 | 0,0412 | down | Sus scrofa solute carrier family 40 member 1-like (LOC100624199), mRNA                                                                                                                                     |
| A_72_P387818 |              | 1,5010 | 0,0105 | down | 324651 MARC 1PIG Sus scrofa cDNA 5', mRNA sequence                                                                                                                                                         |
| A_72_P398118 | LOC100515779 | 1,4970 | 0,0093 | down | Sus scrofa dual specificity tyrosine-phosphorylation-regulated kinase 2-like (LOC100515779), mRNA                                                                                                          |
| A_72_P306433 |              | 1,4970 | 0,0278 | down | MI-P-CP1-nwn-c-11-0-UI.s1 MI-P-CP1 Sus scrofa cDNA clone MI-P-CP1-nwn-c-11-0-UI 3', mRNA sequence                                                                                                          |
| A_72_P058806 | IL17D        | 1,4964 | 0,0087 | down | Sus scrofa interleukin 17D (IL17D), mRNA                                                                                                                                                                   |
| A_72_P359548 | TMX4         | 1,4948 | 0,0220 | down | Sus scrofa thioredoxin-related transmembrane protein 4 (TMX4), mRNA                                                                                                                                        |
| A_72_P359358 |              | 1,4936 | 0,0446 | down | Sus scrofa mRNA, clone:SMG010050A07, expressed in submaxillary gland                                                                                                                                       |
| A_72_P317438 | LOC100624467 | 1,4935 | 0,0268 | down | Sus scrofa zinc finger protein 347-like (LOC100624467), mRNA                                                                                                                                               |
| A_72_P366538 |              | 1,4932 | 0,0171 | down | 899950 MARC 4PIG Sus scrofa cDNA 3', mRNA sequence                                                                                                                                                         |
| A_72_P082626 |              | 1,4926 | 0,0322 | down | BX922545 Sus Scrofa library (scan) Sus scrofa cDNA clone scan0018.j.11 5prim, mRNA sequence                                                                                                                |
| A_72_P491087 | ZBTB2        | 1,4910 | 0,0436 | down | Sus scrofa zinc finger and BTB domain containing 2 (ZBTB2), mRNA                                                                                                                                           |
| A_72_P434019 | LOC100737758 | 1,4901 | 0,0432 | down | Sus scrofa protein transport protein Sec31A-like (LOC100737758), mRNA                                                                                                                                      |
| A_72_P275124 | LOC100738337 | 1,4899 | 0,0260 | down | Sus scrofa myosin light chain kinase, smooth muscle-like (LOC100738337), partial mRNA                                                                                                                      |
| A_72_P023796 |              | 1,4889 | 0,0034 | down | BW965580 full-length enriched swine cDNA library, adult ovary Sus scrofa cDNA clone OVR010067D06 5', mRNA sequence                                                                                         |
| A_72_P410548 |              | 1,4878 | 0,0494 | down | susfleck.FC_N_5_E12 SUSFLECK Fat Cell Normalized Sus scrofa cDNA clone 5_E12, mRNA sequence                                                                                                                |
| A_72_P453504 | PPPDE2       | 1,4875 | 0,0345 | down | Sus scrofa desumoylating isopeptidase 1 (PPPDE2), mRNA                                                                                                                                                     |
| A_72_P370453 | FAM114A1     | 1,4867 | 0,0024 | down | Sus scrofa family with sequence similarity 114, member A1 (FAM114A1), mRNA                                                                                                                                 |
| A_72_P314243 | ELOVL7       | 1,4843 | 0,0005 | down | Sus scrofa ELOVL fatty acid elongase 7 (ELOVL7), mRNA                                                                                                                                                      |
| A_72_P585956 | MTMR14       | 1,4828 | 0,0154 | down | Sus scrofa myotubularin related protein 14 (MTMR14), transcript variant 3, mRNA                                                                                                                            |
| A_72_P226242 |              | 1,4819 | 0,0082 | down | 952597 MARC 4PIG Sus scrofa cDNA 3', mRNA sequence                                                                                                                                                         |
| A_72_P141986 | MAP1A        | 1,4809 | 0,0192 | down | Sus scrofa microtubule-associated protein 1A (MAP1A), mRNA                                                                                                                                                 |
| A_72_P681440 |              | 1,4789 | 0,0408 | down | PDUts1073G07 Porcine testis cDNA library I Sus scrofa cDNA clone PDUts1073G07 5' similar to homologue to ref NM_014477.2  Homo sapiens chromosome 20 open reading frame 10 (C20orf10), mRNA, mRNA sequence |
| A_72_P281869 |              | 1,4778 | 0,0198 | down | Sus scrofa sex comb on midleg-like protein 4-like (LOC100738974), partial mRNA                                                                                                                             |
| A_72_P378713 |              | 1,4778 | 0,0145 | down | Pig DNA sequence from clone CH242-106L21 on chromosome X, complete sequence                                                                                                                                |
| A_72_P017296 | EIF4G1       | 1,4777 | 0,0481 | down | Sus scrofa eukaryotic translation initiation factor 4 gamma, 1 (EIF4G1), mRNA                                                                                                                              |
| A_72_P232527 | SELP         | 1,4776 | 0,0479 | down | Sus scrofa selectin P (granule membrane protein 140kDa, antigen CD62) (SELP), mRNA                                                                                                                         |
| A_72_P109831 | RRAD         | 1,4769 | 0,0401 | down | Sus scrofa Ras-related associated with diabetes (RRAD), partial mRNA                                                                                                                                       |
| A_72_P602644 | CKM          | 1,4767 | 0,0455 | down | Sus scrofa creatine kinase, muscle (CKM), mRNA                                                                                                                                                             |
| A_72_P455657 | TXNRD1       | 1,4752 | 0,0105 | down | Sus scrofa thioredoxin reductase 1 (TXNRD1), mRNA                                                                                                                                                          |
| A_72_P201852 |              | 1,4746 | 0,0279 | down | BX669346 Sus Scrofa library (scac) Sus scrofa cDNA clone scac0029.f.20 3prim, mRNA sequence                                                                                                                |
| A_72_P131261 | RAPH1        | 1,4739 | 0,0496 | down | Sus scrofa Ras association (RalGDS/AF-6) and pleckstrin homology domains 1 (RAPH1), mRNA                                                                                                                   |
| A_72_P186641 | CHST3        | 1,4732 | 0,0003 | down | Sus scrofa carbohydrate (chondroitin 6) sulfotransferase 3 (CHST3), mRNA                                                                                                                                   |
| A_72_P125276 | REEP3        | 1,4723 | 0,0017 | down | Sus scrofa receptor accessory protein 3 (REEP3), mRNA                                                                                                                                                      |
| A_72_P299444 | SNRK         | 1,4721 | 0,0473 | down | Sus scrofa SNF related kinase (SNRK), mRNA                                                                                                                                                                 |
| A_72_P206762 |              | 1,4719 | 0,0353 | down |                                                                                                                                                                                                            |
| A_72_P392563 |              | 1,4713 | 0,0215 | down | BX914598 Sus Scrofa library (scan) Sus scrofa cDNA clone scan0027.d.14 5prim, mRNA sequence                                                                                                                |
| A_72_P389453 | NFATC3       | 1,4712 | 0,0018 | down | Sus scrofa nuclear factor of activated T-cells, cytoplasmic, calcineurin-dependent 3 (NFATC3), partial mRNA                                                                                                |
| A_72_P217742 | LOC100521749 | 1,4707 | 0,0010 | down | PREDICTED: Sus scrofa breakpoint cluster region protein (LOC100521749), mRNA                                                                                                                               |
| A_72_P128021 |              | 1,4701 | 0,0038 | down | 1106573 MARC 4PIG Sus scrofa cDNA 5', mRNA sequence                                                                                                                                                        |
| A_72_P117351 |              | 1,4697 | 0,0210 | down | 1554020 MARC 3PIG Sus scrofa cDNA 3', mRNA sequence                                                                                                                                                        |
| A_72_P124116 |              | 1,4694 | 0,0061 | down | AJ649612 CSEQRAN19 Sus scrofa cDNA clone C0003272_P12, mRNA sequence                                                                                                                                       |
| A_72_P119551 | KDM5B        | 1,4691 | 0,0034 | down | Sus scrofa lysine (K)-specific demethylase 5B (KDM5B), mRNA                                                                                                                                                |
| A_72_P327348 | LOC106510427 | 1,4683 | 0,0158 | down | PREDICTED: Sus scrofa uncharacterized LOC106510427 (LOC106510427), ncRNA                                                                                                                                   |
| A_72_P412888 | CEBPA        | 1,4661 | 0,0304 | down | Sus scrofa CCAAT/enhancer binding protein (C/EBP), alpha (CEBPA), mRNA                                                                                                                                     |

|              |                         |        |        |      |                                                                                                                                |
|--------------|-------------------------|--------|--------|------|--------------------------------------------------------------------------------------------------------------------------------|
| A_72_P178056 | TMEM57                  | 1,4658 | 0,0129 | down | Sus scrofa transmembrane protein 57 (TMEM57), mRNA                                                                             |
| A_72_P186881 | LOC100520636            | 1,4652 | 0,0186 | down | Sus scrofa very long-chain specific acyl-CoA dehydrogenase, mitochondrial-like (LOC100520636), mRNA                            |
| A_72_P388418 | CABIN1                  | 1,4650 | 0,0263 | down | Sus scrofa calcineurin binding protein 1 (CABIN1), mRNA                                                                        |
| A_72_P239292 |                         | 1,4650 | 0,0286 | down | 262953 MARC 2PIG Sus scrofa cDNA 5', mRNA sequence                                                                             |
| A_72_P555835 | CITED2                  | 1,4646 | 0,0440 | down | Sus scrofa Cbp/p300-interacting transactivator, with Glu/Asp-rich carboxy-terminal domain, 2 (CITED2), mRNA                    |
| A_72_P013036 | FANCD2                  | 1,4644 | 0,0472 | down | Sus scrofa Fanconi anemia, complementation group D2 (FANCD2), mRNA                                                             |
| A_72_P225872 | LOC102164714            | 1,4629 | 0,0097 | down | Sus scrofa uncharacterized LOC102164714 (LOC102164714), misc_RNA                                                               |
| A_72_P394148 | LOC102166027            | 1,4616 | 0,0096 | down | Sus scrofa TBC1 domain family member 10B-like (LOC102166027), mRNA                                                             |
| A_72_P177961 | RENBP                   | 1,4611 | 0,0114 | down | Sus scrofa renin binding protein (RENBP), mRNA                                                                                 |
| A_72_P385113 | SLC16A8                 | 1,4611 | 0,0026 | down | Sus scrofa solute carrier family 16 (monocarboxylate transporter), member 8 (SLC16A8), mRNA                                    |
| A_72_P101771 | FTSJ3                   | 1,4611 | 0,0399 | down | Sus scrofa FtsJ homolog 3 (E. coli) (FTSJ3), mRNA                                                                              |
| A_72_P493740 | TLE3                    | 1,4602 | 0,0244 | down | Sus scrofa transducin-like enhancer of split 3 (E(sp1) homolog, Drosophila) (TLE3), partial mRNA                               |
| A_72_P444471 | ME1                     | 1,4589 | 0,0281 | down | Sus scrofa malic enzyme 1, NADP(+)-dependent, cytosolic (ME1), mRNA                                                            |
| A_72_P442534 | PIP4K2A                 | 1,4575 | 0,0373 | down | Sus scrofa phosphatidylinositol-5-phosphate 4-kinase, type II, alpha (PIP4K2A), mRNA                                           |
| A_72_P318233 |                         | 1,4575 | 0,0471 | down | 364283 MARC 2PIG Sus scrofa cDNA 5', mRNA sequence                                                                             |
| A_72_P214892 | ZNF236                  | 1,4570 | 0,0144 | down | Sus scrofa zinc finger protein 236 (ZNF236), partial mRNA                                                                      |
| A_72_P672137 | CEBPB                   | 1,4567 | 0,0292 | down | PREDICTED: Sus scrofa CCAAT/enhancer binding protein (C/EBP), beta (CEBPB), mRNA                                               |
| A_72_P245572 | HBZ                     | 1,4551 | 0,0270 | down | Sus scrofa hemoglobin, zeta (HBZ), mRNA                                                                                        |
| A_72_P391818 |                         | 1,4517 | 0,0072 | down | Sus scrofa mRNA, clone: PST010025D12, expressed in prostate                                                                    |
| A_72_P306084 | MYLK                    | 1,4501 | 0,0315 | down | Sus scrofa myosin light chain kinase (MYLK), mRNA                                                                              |
| A_72_P062126 |                         | 1,4484 | 0,0086 | down | rck24_j23.y1 cki Sus scrofa cDNA 5', mRNA sequence                                                                             |
| A_72_P369043 | SMAD7                   | 1,4482 | 0,0419 | down | Sus scrofa SMAD family member 7 (SMAD7), mRNA                                                                                  |
| A_72_P046786 |                         | 1,4474 | 0,0373 | down | AJ958093 KN404_2 Sus scrofa cDNA clone C0007754h01 5', mRNA sequence                                                           |
| A_72_P642520 | CEBPB                   | 1,4472 | 0,0399 | down | Sus scrofa CCAAT/enhancer-binding protein beta (C/EBP beta) mRNA, 3' UTR                                                       |
| A_72_P405563 | SH3D19                  | 1,4470 | 0,0198 | down | Sus scrofa SH3 domain containing 19 (SH3D19), mRNA                                                                             |
| A_72_P144826 | GPX2                    | 1,4448 | 0,0411 | down | Sus scrofa glutathione peroxidase 2 (gastrointestinal) (GPX2), mRNA                                                            |
| A_72_P706296 | DCLK3                   | 1,4433 | 0,0269 | down | Sus scrofa doublecortin-like kinase 3 (DCLK3), mRNA                                                                            |
| A_72_P744064 |                         | 1,4429 | 0,0144 | down |                                                                                                                                |
| A_72_P264607 |                         | 1,4427 | 0,0364 | down | Sus scrofa mRNA, clone: OVRM10154F10, expressed in ovary                                                                       |
| A_72_P030756 | AZIN1                   | 1,4426 | 0,0477 | down | Sus scrofa antizyme inhibitor 1 (AZIN1), mRNA                                                                                  |
| A_72_P023201 | LOC100155528            | 1,4395 | 0,0077 | down | Sus scrofa uncharacterized LOC100155528 (LOC100155528), mRNA                                                                   |
| A_72_P599748 | CXCR4                   | 1,4393 | 0,0363 | down | Sus scrofa mRNA, clone: AMP010061D05, expressed in alveolar macrophage                                                         |
| A_72_P322718 | RARB                    | 1,4393 | 0,0485 | down | PREDICTED: Sus scrofa retinoic acid receptor, beta (RARB), transcript variant X3, mRNA                                         |
| A_72_P669017 | RPIA                    | 1,4385 | 0,0080 | down | Sus scrofa ribose 5-phosphate isomerase A (RPIA), mRNA                                                                         |
| A_72_P773975 |                         | 1,4378 | 0,0498 | down | HX239372 full-length enriched swine cDNA library, adult spleen Sus scrofa cDNA clone SPLT10002C08, mRNA sequence               |
| A_72_P184296 |                         | 1,4367 | 0,0315 | down | BW966806 full-length enriched swine cDNA library, adult ovary Sus scrofa cDNA clone OVR010082B12 5', mRNA sequence             |
| A_72_P308648 | MSN                     | 1,4350 | 0,0205 | down | Sus scrofa moesin (MSN), mRNA                                                                                                  |
| A_72_P235462 | KAT2B                   | 1,4332 | 0,0267 | down | Sus scrofa K(lysine) acetyltransferase 2B (KAT2B), mRNA                                                                        |
| A_72_P606653 | CRELD1                  | 1,4329 | 0,0424 | down | Sus scrofa cysteine-rich with EGF-like domains 1 (CRELD1), mRNA                                                                |
| A_72_P425104 |                         | 1,4327 | 0,0037 | down | UMC-p4civv1-021-e02 4-Cell-Embryo-(in vivo) p4civv Sus scrofa cDNA 3', mRNA sequence                                           |
| A_72_P359033 | MESDC1                  | 1,4327 | 0,0095 | down | Sus scrofa mesoderm development candidate 1 (MESDC1), mRNA                                                                     |
| A_72_P443759 | GLTSCR1L                | 1,4316 | 0,0015 | down | PREDICTED: Sus scrofa GLTSCR1-like (GLTSCR1L), transcript variant X1, mRNA                                                     |
| A_72_P323148 |                         | 1,4293 | 0,0299 | down | Sus scrofa mRNA, clone: OVRM10055D01, expressed in ovary                                                                       |
| A_72_P544532 | IGF2                    | 1,4281 | 0,0386 | down | Sus scrofa insulin-like growth factor 2 precursor transcript variant 8 (IGF2) mRNA                                             |
| A_72_P222532 | SACM1L                  | 1,4272 | 0,0244 | down | PREDICTED: Sus scrofa SAC1 suppressor of actin mutations 1-like (yeast) (SACM1L), transcript variant X1, mRNA                  |
| A_72_P106356 | C4H1orf189              | 1,4270 | 0,0119 | down | Sus scrofa chromosome 4 open reading frame, human C1orf189 (C4H1orf189), mRNA                                                  |
| A_72_P023541 | SLC12A2                 | 1,4265 | 0,0228 | down | Sus scrofa solute carrier family 12 (sodium/potassium/chloride transporter), member 2 (SLC12A2), mRNA                          |
| A_72_P179566 | ARHGAP28                | 1,4259 | 0,0336 | down | Sus scrofa Rho GTPase activating protein 28 (ARHGAP28), mRNA                                                                   |
| A_72_P303349 | LOC780419               | 1,4253 | 0,0203 | down | Sus scrofa UB2D1 (LOC780419), mRNA                                                                                             |
| A_72_P259537 | NUAK2                   | 1,4252 | 0,0282 | down | Sus scrofa NUAK family, SNF1-like kinase, 2 (NUAK2), mRNA                                                                      |
| A_72_P487898 | STX2                    | 1,4239 | 0,0264 | down | Sus scrofa syntaxin 2 (STX2), mRNA                                                                                             |
| A_72_P383133 | ABCF1                   | 1,4228 | 0,0166 | down | Sus scrofa ATP-binding cassette, sub-family F (GCN20), member 1 (ABCF1), mRNA                                                  |
| A_72_P245047 | IFNAR1, IFNGR2, TMEM50B | 1,4227 | 0,0265 | down | Sus scrofa IFNAR1 gene, IFNGR2 gene and TMEM50B gene                                                                           |
| A_72_P140041 | GTF3C1                  | 1,4226 | 0,0113 | down | Sus scrofa general transcription factor IIIC, polypeptide 1, alpha 220kDa (GTF3C1), mRNA                                       |
| A_72_P361938 |                         | 1,4220 | 0,0150 | down | Sus scrofa uncharacterized LOC100517767 (LOC100517767), misc_RNA                                                               |
| A_72_P077381 | ITGAL                   | 1,4215 | 0,0291 | down | Sus scrofa integrin, alpha L (antigen CD11A (p180), lymphocyte function-associated antigen 1; alpha polypeptide) (ITGAL), mRNA |
| A_72_P299809 |                         | 1,4201 | 0,0293 | down | 326271 MARC 1PIG Sus scrofa cDNA 5', mRNA sequence                                                                             |
| A_72_P204112 | DNAJB1                  | 1,4179 | 0,0301 | down | Sus scrofa dnaJ homolog subfamily B member 1-like (LOC100627777), mRNA                                                         |
| A_72_P076926 |                         | 1,4176 | 0,0495 | down | 239016 MARC 2PIG Sus scrofa cDNA 5', mRNA sequence                                                                             |
| A_72_P365638 | INPP5B                  | 1,4175 | 0,0248 | down | Sus scrofa inositol polyphosphate-5-phosphatase, 75kDa (INPP5B), mRNA                                                          |
| A_72_P021606 | TRIM4                   | 1,4158 | 0,0149 | down | Sus scrofa tripartite motif containing 4 (TRIM4), mRNA                                                                         |
| A_72_P511680 |                         | 1,4154 | 0,0466 | down | not found                                                                                                                      |
| A_72_P383898 | APPL1                   | 1,4123 | 0,0040 | down | Sus scrofa adaptor protein, phosphotyrosine interaction, PH domain and leucine zipper containing 1 (APPL1), mRNA               |
| A_72_P016721 | MYOF                    | 1,4117 | 0,0270 | down | Sus scrofa myoferlin (MYOF), mRNA                                                                                              |
| A_72_P188801 | CHD8                    | 1,4115 | 0,0268 | down | Sus scrofa chromodomain helicase DNA binding protein 8 (CHD8), partial mRNA                                                    |
| A_72_P490818 | CALY                    | 1,4108 | 0,0259 | down | Sus scrofa calcyon neuron-specific vesicular protein (CALY), mRNA                                                              |
| A_72_P411143 | PHF20L1                 | 1,4096 | 0,0175 | down | Sus scrofa PHD finger protein 20-like 1 (PHF20L1), mRNA                                                                        |
| A_72_P450017 | PABPC1L                 | 1,4083 | 0,0045 | down | Sus scrofa poly(A) binding protein, cytoplasmic 1-like (PABPC1L), mRNA                                                         |
| A_72_P077316 | BDKRB1                  | 1,4079 | 0,0398 | down | Sus scrofa bradykinin receptor B1 (BDKRB1), mRNA                                                                               |

|              |              |        |        |      |                                                                                                                    |
|--------------|--------------|--------|--------|------|--------------------------------------------------------------------------------------------------------------------|
| A_72_P431514 | ARHGAP10     | 1,4077 | 0,0271 | down | PREDICTED: Sus scrofa Rho GTPase activating protein 10 (ARHGAP10), mRNA                                            |
| A_72_P631250 | ETS1         | 1,4074 | 0,0200 | down | Sus scrofa v-ets erythroblastosis virus E26 oncogene homolog 1 (avian) (ETS1), mRNA                                |
| A_72_P646436 | PGA          | 1,4070 | 0,0384 | down | Sus scrofa pepsinogen A (PGA), mRNA                                                                                |
| A_72_P005561 | TP63         | 1,4064 | 0,0140 | down | Sus scrofa tumor protein p63 (TP63), mRNA                                                                          |
| A_72_P391903 | PIGV         | 1,4046 | 0,0185 | down | PREDICTED: Sus scrofa phosphatidylinositol glycan anchor biosynthesis, class V (PIGV), transcript variant X3, mRNA |
| A_72_P166706 | GRB7         | 1,4038 | 0,0126 | down | Sus scrofa growth factor receptor-bound protein 7 (GRB7), mRNA                                                     |
| A_72_P189831 | EP300        | 1,4034 | 0,0220 | down | Sus scrofa E1A binding protein p300 (EP300), mRNA                                                                  |
| A_72_P186391 | CD247        | 1,4026 | 0,0068 | down | Sus scrofa CD247 molecule (CD247), mRNA                                                                            |
| A_72_P540123 | LDB1         | 1,4015 | 0,0435 | down | Sus scrofa LIM domain binding 1 (LDB1), mRNA                                                                       |
| A_72_P651922 | LHB          | 1,4011 | 0,0061 | down | Sus scrofa luteinizing hormone beta polypeptide (LHB), mRNA                                                        |
| A_72_P724643 | TPM1         | 1,4000 | 0,0271 | down | Sus scrofa tropomyosin 1 (alpha) (TPM1), mRNA                                                                      |
| A_72_P642425 |              | 1,3994 | 0,0488 | down | rcik09_g11.y1 cki Sus scrofa cDNA 5', mRNA sequence                                                                |
| A_72_P317973 | KMT2A        | 1,3977 | 0,0063 | down | Sus scrofa lysine (K)-specific methyltransferase 2A (KMT2A), mRNA                                                  |
| A_72_P732383 | CXCL2        | 1,3973 | 0,0299 | down | Sus scrofa chemokine (C-X-C motif) ligand 2 (CXCL2), mRNA                                                          |
| A_72_P753775 | SAV1         | 1,3970 | 0,0175 | down | Sus scrofa salvador homolog 1 (Drosophila) (SAV1), mRNA                                                            |
| A_72_P532951 | FAM21C       | 1,3969 | 0,0314 | down | Sus scrofa family with sequence similarity 21, member C (FAM21C), mRNA                                             |
| A_72_P222767 | TRIP12       | 1,3966 | 0,0123 | down | Sus scrofa thyroid hormone receptor interactor 12 (TRIP12), mRNA                                                   |
| A_72_P058991 | KLF13        | 1,3964 | 0,0183 | down | Sus scrofa Kruppel-like factor 13 (KLF13) mRNA, complete cds                                                       |
| A_72_P246162 | WWP1         | 1,3959 | 0,0458 | down | Sus scrofa WW domain containing E3 ubiquitin protein ligase 1 (WWP1), mRNA                                         |
| A_72_P264392 | LOC102161272 | 1,3957 | 0,0216 | down | Sus scrofa uncharacterized LOC102161272 (LOC102161272), misc_RNA                                                   |
| A_72_P518348 | LOC100155473 | 1,3945 | 0,0131 | down | Sus scrofa dedicator of cytokinesis protein 1-like (LOC100155473), mRNA                                            |
| A_72_P329198 |              | 1,3943 | 0,0000 | down | rlin19_c15.y1 lin Sus scrofa cDNA 5', mRNA sequence                                                                |
| A_72_P555381 | MIC-2        | 1,3943 | 0,0222 | down | Sus scrofa MHC class I related antigen 2 (MIC-2), mRNA                                                             |
| A_72_P200087 | LOC100153182 | 1,3920 | 0,0258 | down | Sus scrofa EF-hand calcium-binding domain-containing protein 1-like (LOC100153182), mRNA                           |
| A_72_P475675 | FAM102B      | 1,3913 | 0,0234 | down | PREDICTED: Sus scrofa family with sequence similarity 102, member B (FAM102B), mRNA                                |
| A_72_P084881 | ELANE        | 1,3913 | 0,0480 | down | Sus scrofa elastase, neutrophil expressed (ELANE), mRNA                                                            |
| A_72_P003386 | PYGL         | 1,3872 | 0,0049 | down | Sus scrofa phosphorylase, glycogen, liver (PYGL), mRNA                                                             |
| A_72_P117276 |              | 1,3868 | 0,0167 | down | 1570154 MARC 3PIG Sus scrofa cDNA 3', mRNA sequence                                                                |
| A_72_P441514 | CSF3         | 1,3865 | 0,0263 | down | Sus scrofa colony stimulating factor 3 (granulocyte) (CSF3), mRNA                                                  |
| A_72_P584851 | LY96         | 1,3842 | 0,0291 | down | Sus scrofa lymphocyte antigen 96 (LY96), mRNA                                                                      |
| A_72_P406183 | CBLB         | 1,3841 | 0,0235 | down | Sus scrofa Cbl proto-oncogene B, E3 ubiquitin protein ligase (CBLB), mRNA                                          |
| A_72_P005506 | IKZF4        | 1,3834 | 0,0342 | down | Sus scrofa IKAROS family zinc finger 4 (Eos) (IKZF4), mRNA                                                         |
| A_72_P271999 | MYCT1        | 1,3826 | 0,0393 | down | PREDICTED: Sus scrofa myc target 1 (MYCT1), mRNA                                                                   |
| A_72_P243407 | GOLPH3L      | 1,3810 | 0,0448 | down | Sus scrofa golgi phosphoprotein 3-like (GOLPH3L), mRNA                                                             |
| A_72_P660698 | RAB11FIP2    | 1,3810 | 0,0046 | down | Sus scrofa RAB11 family interacting protein 2 (class I) (RAB11FIP2), mRNA                                          |
| A_72_P476273 | LOC100153329 | 1,3803 | 0,0427 | down | Sus scrofa histone H2A type 1-A-like (LOC100153329), transcript variant X1, mRNA                                   |
| A_72_P041636 | ZCCHC2       | 1,3799 | 0,0094 | down | PREDICTED: Sus scrofa zinc finger, CCHC domain containing 2 (ZCCHC2), partial mRNA                                 |
| A_72_P068256 |              | 1,3797 | 0,0359 | down | recc2825c_o18.y1 ecc Sus scrofa cDNA 5', mRNA sequence                                                             |
| A_72_P609999 | LY96         | 1,3775 | 0,0406 | down | Sus scrofa lymphocyte antigen 96 (LY96), mRNA                                                                      |
| A_72_P474341 | DDR2         | 1,3775 | 0,0363 | down | Sus scrofa discoidin domain receptor tyrosine kinase 2 (DDR2), mRNA                                                |
| A_72_P443520 | LOC100621389 | 1,3751 | 0,0169 | down | Sus scrofa histone H4-like (LOC100621389), mRNA                                                                    |
| A_72_P572519 | CEP44        | 1,3741 | 0,0239 | down | Sus scrofa centrosomal protein 44kDa (CEP44), mRNA                                                                 |
| A_72_P098116 | DNAAF1       | 1,3733 | 0,0362 | down | Sus scrofa dynein, axonemal, assembly factor 1 (DNAAF1), mRNA                                                      |
| A_72_P078126 |              | 1,3730 | 0,0029 | down | Sus scrofa mRNA, clone:PBL010030D02, expressed in peripheral blood mononuclear cells                               |
| A_72_P709589 | APP          | 1,3725 | 0,0465 | down | Sus scrofa amyloid beta (A4) precursor protein (APP), mRNA                                                         |
| A_72_P406648 |              | 1,3721 | 0,0331 | down | rcst09_b2E11.y1 cst Sus scrofa cDNA 5', mRNA sequence                                                              |
| A_72_P088596 | PLIN2        | 1,3720 | 0,0166 | down | Sus scrofa perilipin 2 (PLIN2), mRNA                                                                               |
| A_72_P108371 | HSD3B1       | 1,3706 | 0,0415 | down | Sus scrofa hydroxy-delta-5-steroid dehydrogenase, 3 beta- and steroid delta-isomerase 1 (HSD3B1), mRNA             |
| A_72_P087296 | MDFIC        | 1,3706 | 0,0398 | down | Sus scrofa MyoD family inhibitor domain containing (MDFIC), mRNA                                                   |
| A_72_P153441 |              | 1,3691 | 0,0075 | down | reye1613b_e22r1.y1 eye Sus scrofa cDNA 5', mRNA sequence                                                           |
| A_72_P405313 | CYLD         | 1,3678 | 0,0052 | down | PREDICTED: Sus scrofa cylindromatosis (turban tumor syndrome) (CYLD), mRNA                                         |
| A_72_P165221 | CLN3         | 1,3675 | 0,0216 | down | Sus scrofa ceroid-lipofuscinosis, neuronal 3 (CLN3), mRNA                                                          |
| A_72_P264357 |              | 1,3672 | 0,0267 | down | BX919483 Sus Scrofa library (scan) Sus scrofa cDNA clone scan0004.j.09 5prim, mRNA sequence                        |
| A_72_P453774 | PRDM4        | 1,3668 | 0,0150 | down | Sus scrofa PR domain containing 4 (PRDM4), mRNA                                                                    |
| A_72_P709040 |              | 1,3666 | 0,0358 | down | Sus scrofa chromosome 6 open reading frame 106 ortholog (C7H6orf106), mRNA                                         |
| A_72_P261657 | CBL          | 1,3657 | 0,0337 | down | Sus scrofa Cbl proto-oncogene, E3 ubiquitin protein ligase (CBL), mRNA                                             |
| A_72_P313608 | SYN1         | 1,3652 | 0,0406 | down | Sus scrofa synapsin I (SYN1), mRNA                                                                                 |
| A_72_P035886 | APOA1        | 1,3652 | 0,0438 | down | Sus scrofa apolipoprotein A-I (APOA1), mRNA                                                                        |
| A_72_P474927 |              | 1,3649 | 0,0245 | down |                                                                                                                    |
| A_72_P405233 | TM7SF2       | 1,3648 | 0,0401 | down | Sus scrofa transmembrane 7 superfamily member 2 (TM7SF2), mRNA                                                     |
| A_72_P372203 | PCIF1        | 1,3638 | 0,0310 | down | Sus scrofa PDX1 C-terminal inhibiting factor 1 (PCIF1), mRNA                                                       |
| A_72_P019266 |              | 1,3635 | 0,0342 | down |                                                                                                                    |
| A_72_P198192 |              | 1,3634 | 0,0486 | down | rcst09_b2E11.y1 cst Sus scrofa cDNA 5', mRNA sequence                                                              |
| A_72_P323168 |              | 1,3632 | 0,0134 | down | Sus scrofa mRNA, clone:OVRM10064C11, expressed in ovary                                                            |
| A_72_P402618 |              | 1,3617 | 0,0294 | down | rese25c_k5.y1 ese Sus scrofa cDNA 5', mRNA sequence                                                                |
| A_72_P628192 | INPP4A       | 1,3602 | 0,0220 | down | Sus scrofa inositol polyphosphate-4-phosphatase, type I, 107kDa (INPP4A), mRNA                                     |
| A_72_P077366 | DTNBP1       | 1,3598 | 0,0181 | down | Sus scrofa dystrobrevin binding protein 1 (DTNBP1), mRNA                                                           |
| A_72_P006376 | MRAP2        | 1,3597 | 0,0148 | down | Sus scrofa melanocortin 2 receptor accessory protein 2 (MRAP2), mRNA                                               |
| A_72_P226142 |              | 1,3584 | 0,0440 | down | 1000732 MARC 4PIG Sus scrofa cDNA 3', mRNA sequence                                                                |
| A_72_P233662 |              | 1,3581 | 0,0092 | down | Sus scrofa mRNA, clone: MLTL10071B08, expressed in longissimus muscle                                              |
| A_72_P374898 |              | 1,3572 | 0,0316 | down | BX922043 Sus Scrofa library (scan) Sus scrofa cDNA clone scan0023.e.07 5prim, mRNA sequence                        |
| A_72_P443877 | LOC100620346 | 1,3567 | 0,0442 | down | Sus scrofa uncharacterized LOC100620346 (LOC100620346), misc_RNA                                                   |
| A_72_P065171 | ZBED5        | 1,3566 | 0,0117 | down | Sus scrofa zinc finger, BED-type containing 5 (ZBED5), mRNA                                                        |
| A_72_P676396 | ARID5B       | 1,3559 | 0,0131 | down | Sus scrofa AT rich interactive domain 5B (MRF1-like) (ARID5B), mRNA                                                |
| A_72_P015121 |              | 1,3529 | 0,0183 | down | 1117432 MARC 4PIG Sus scrofa cDNA 3', mRNA sequence                                                                |
| A_72_P291569 | LOC100513756 | 1,3514 | 0,0197 | down | Sus scrofa TPR and ankyrin repeat-containing protein 1-like (LOC100513756), mRNA                                   |



|              |              |        |        |      |                                                                                                                       |
|--------------|--------------|--------|--------|------|-----------------------------------------------------------------------------------------------------------------------|
| A_72_P432954 | CDKL5        | 1,3510 | 0,0236 | down | Sus scrofa cyclin-dependent kinase-like 5 (CDKL5), mRNA                                                               |
| A_72_P479357 | CCNK         | 1,3502 | 0,0349 | down | Sus scrofa cyclin K (CCNK), mRNA                                                                                      |
| A_72_P407903 |              | 1,3500 | 0,0376 | down | Sus scrofa mRNA, clone: PST010052E12, expressed in prostate                                                           |
| A_72_P088186 | OPRL1        | 1,3477 | 0,0010 | down | Sus scrofa opiate receptor-like 1 (OPRL1), mRNA                                                                       |
| A_72_P000256 |              | 1,3476 | 0,0020 | down | HX204550 full-length enriched swine cDNA library, adult brain (frontal lobe)                                          |
| A_72_P444413 | SOD2         | 1,3473 | 0,0232 | down | Sus scrofa cDNA clone BFLT10135E03, mRNA sequence                                                                     |
| A_72_P443854 | ZFP36L1      | 1,3467 | 0,0466 | down | Sus scrofa superoxide dismutase 2, mitochondrial (SOD2), transcript variant X1, mRNA                                  |
| A_72_P232372 | ZFAND5       | 1,3460 | 0,0315 | down | Sus scrofa ZFP36 ring finger protein-like 1 (ZFP36L1), mRNA                                                           |
| A_72_P555755 | RAD23B       | 1,3441 | 0,0217 | down | Sus scrofa zinc finger, AN1-type domain 5 (ZFAND5), mRNA                                                              |
| A_72_P708845 | CDC42SE1     | 1,3408 | 0,0154 | down | Sus scrofa RAD23 homolog B (S. cerevisiae) (RAD23B), mRNA                                                             |
| A_72_P362778 | HNRNPK       | 1,3404 | 0,0185 | down | Sus scrofa CDC42 small effector 1 (CDC42SE1), mRNA                                                                    |
| A_72_P703926 | LOC100513756 | 1,3389 | 0,0383 | down | Sus scrofa heterogeneous nuclear ribonucleoprotein K (HNRNPK), mRNA                                                   |
| A_72_P443643 | LOC100158121 | 1,3382 | 0,0400 | down | PREDICTED: Sus scrofa TPR and ankyrin repeat-containing protein 1-like (LOC100513756), mRNA                           |
| A_72_P475146 | PLEKHO1      | 1,3381 | 0,0173 | down | Sus scrofa histone H2A type 1-like (LOC100158121), mRNA                                                               |
| A_72_P383743 | BRD2         | 1,3377 | 0,0301 | down | PREDICTED: Sus scrofa pleckstrin homology domain containing, family O member 1 (PLEKHO1), transcript variant X1, mRNA |
| A_72_P688621 | SIRPA        | 1,3374 | 0,0272 | down | Sus scrofa bromodomain containing 2 (BRD2), mRNA                                                                      |
| A_72_P553926 |              | 1,3356 | 0,0091 | down | Sus scrofa signal-regulatory protein alpha (SIRPA), mRNA                                                              |
| A_72_P230187 | KANSL1       | 1,3355 | 0,0101 | down | Sus scrofa KAT8 regulatory NSL complex subunit 1 (KANSL1), mRNA                                                       |
| A_72_P474357 | UHMK1        | 1,3344 | 0,0071 | down | PREDICTED: Sus scrofa U2AF homology motif (UHM) kinase 1 (UHMK1), mRNA                                                |
| A_72_P441858 | IL10RB       | 1,3340 | 0,0230 | down | Sus scrofa interleukin 10 receptor, beta (IL10RB), mRNA                                                               |
| A_72_P437009 | CSNK2A2      | 1,3338 | 0,0179 | down | Sus scrofa casein kinase 2, alpha prime polypeptide (CSNK2A2), mRNA                                                   |
| A_72_P477646 | ABHD2        | 1,3336 | 0,0221 | down | Sus scrofa abhydrolase domain containing 2 (ABHD2), mRNA                                                              |
| A_72_P641264 |              | 1,3335 | 0,0195 | down |                                                                                                                       |
| A_72_P273434 | LOC100737341 | 1,3325 | 0,0323 | down | Sus scrofa synapse differentiation-inducing gene protein 1-like (LOC100737341), partial mRNA                          |
| A_72_P338323 |              | 1,3325 | 0,0080 | down | 1556591 MARC 3PIG Sus scrofa cDNA 3', mRNA sequence                                                                   |
| A_72_P106136 | HIPK3        | 1,3322 | 0,0283 | down | PREDICTED: Sus scrofa homeodomain interacting protein kinase 3 (HIPK3), transcript variant X4, mRNA                   |
| A_72_P170956 |              | 1,3319 | 0,0473 | down | 230281 MARC 2PIG Sus scrofa cDNA 5', mRNA sequence                                                                    |
| A_72_P053766 | LOC106506662 | 1,3317 | 0,0001 | down | PREDICTED: Sus scrofa cilia- and flagella-associated protein 53-like (LOC106506662), mRNA                             |
| A_72_P084236 |              | 1,3311 | 0,0269 | down | Sus scrofa clone KVL2011 microsatellite sequence                                                                      |
| A_72_P517672 | SLA-8        | 1,3310 | 0,0448 | down | Sus scrofa MHC class I antigen 8 (SLA-8), mRNA                                                                        |
| A_72_P286854 | NCEH1        | 1,3296 | 0,0321 | down | Sus scrofa neutral cholesterol ester hydrolase 1 (NCEH1), mRNA                                                        |
| A_72_P692777 |              | 1,3291 | 0,0156 | down | Sus scrofa mRNA, clone: OVRM10096D11, expressed in ovary                                                              |
| A_72_P279714 | CCDC85A      | 1,3290 | 0,0236 | down | Sus scrofa coiled-coil domain containing 85A (CCDC85A), mRNA                                                          |
| A_72_P193702 | LOC106504487 | 1,3287 | 0,0482 | down | PREDICTED: Sus scrofa uncharacterized LOC106504487 (LOC106504487), ncRNA                                              |
| A_72_P633177 | TMCO1        | 1,3281 | 0,0281 | down | Sus scrofa transmembrane and coiled-coil domains 1 (TMCO1), mRNA                                                      |
| A_72_P093506 |              | 1,3277 | 0,0052 | down | AJ648384 CSEQRAN19 Sus scrofa cDNA clone C0003264_I04, mRNA sequence                                                  |
| A_72_P223937 | ICAM-1       | 1,3274 | 0,0288 | down | Sus scrofa intercellular adhesion molecule-1 (ICAM-1), mRNA                                                           |
| A_72_P584626 | PLN          | 1,3267 | 0,0473 | down | Sus scrofa phospholamban (PLN), mRNA                                                                                  |
| A_72_P058776 | LOC100620661 | 1,3260 | 0,0005 | down | PREDICTED: Sus scrofa ubiquitin carboxyl-terminal hydrolase 10-like (LOC100620661), mRNA                              |
| A_72_P176331 |              | 1,3257 | 0,0231 | down | Sus scrofa mRNA for hypothetical protein (5'; clone 2C4)                                                              |
| A_72_P185136 | MAT2B        | 1,3254 | 0,0269 | down | Sus scrofa methionine adenosyltransferase II, beta (MAT2B), mRNA                                                      |
| A_72_P168911 | PAN3         | 1,3253 | 0,0389 | down | Sus scrofa PAN3 poly(A) specific ribonuclease subunit homolog (S. cerevisiae) (PAN3), mRNA                            |
| A_72_P452702 | FAM124A      | 1,3236 | 0,0212 | down | Sus scrofa family with sequence similarity 124A (FAM124A), mRNA                                                       |
| A_72_P453839 | CCNT1        | 1,3234 | 0,0478 | down | PREDICTED: Sus scrofa cyclin T1 (CCNT1), transcript variant X1, mRNA                                                  |
| A_72_P169991 | LOC102158880 | 1,3229 | 0,0252 | down | Sus scrofa uncharacterized LOC102158880 (LOC102158880), misc_RNA                                                      |
| A_72_P530528 | TACC2        | 1,3224 | 0,0020 | down | Sus scrofa transforming, acidic coiled-coil containing protein 2 (TACC2), mRNA                                        |
| A_72_P235247 | LOC102163992 | 1,3223 | 0,0188 | down | Sus scrofa uncharacterized LOC102163992 (LOC102163992), misc_RNA                                                      |
| A_72_P247297 | DAPK1        | 1,3212 | 0,0100 | down | Sus scrofa death-associated protein kinase 1 (DAPK1), mRNA                                                            |
| A_72_P431954 | RBMS2        | 1,3209 | 0,0033 | down | Sus scrofa RNA binding motif, single stranded interacting protein 2 (RBMS2), partial mRNA                             |
| A_72_P210287 | ST3GAL1      | 1,3207 | 0,0216 | down | Sus scrofa ST3 beta-galactoside alpha-2,3-sialyltransferase 1 (ST3GAL1), mRNA                                         |
| A_72_P540858 | DCAF8        | 1,3201 | 0,0474 | down | Sus scrofa DDB1 and CUL4 associated factor 8 (DCAF8), mRNA                                                            |
| A_72_P202212 |              | 1,3188 | 0,0031 | down | UNL-P-FN-ct-g-02-0-UNL.s2 UNL-P-FN Sus scrofa cDNA clone UNL-P-FN-ct-g-02-0-UNL 3', mRNA sequence                     |
| A_72_P429584 | IQSEC2       | 1,3185 | 0,0446 | down | Sus scrofa IQ motif and Sec7 domain 2 (IQSEC2), mRNA                                                                  |
| A_72_P299589 | DNAJB12      | 1,3183 | 0,0497 | down | Sus scrofa DnaJ (Hsp40) homolog, subfamily B, member 12 (DNAJB12), mRNA                                               |
| A_72_P476411 | LOC100157763 | 1,3182 | 0,0137 | down | Sus scrofa histone H2A type 1-like (LOC100157763), mRNA                                                               |
| A_72_P055626 |              | 1,3182 | 0,0315 | down | AJ947164 KN404_1 Sus scrofa cDNA clone C0007745I10 3', mRNA sequence                                                  |
| A_72_P156796 | ZNF256       | 1,3181 | 0,0245 | down | Sus scrofa zinc finger protein 256 (ZNF256), mRNA                                                                     |
| A_72_P301704 | CPEB4        | 1,3181 | 0,0191 | down | Sus scrofa cytoplasmic polyadenylation element binding protein 4 (CPEB4), mRNA                                        |
| A_72_P594119 | GCLM         | 1,3175 | 0,0458 | down | Sus scrofa glutamate-cysteine ligase, modifier subunit (GCLM), mRNA                                                   |
| A_72_P033766 |              | 1,3175 | 0,0149 | down | 936656 MARC 4PIG Sus scrofa cDNA 3', mRNA sequence                                                                    |
| A_72_P372868 |              | 1,3172 | 0,0181 | down | 856260 MARC 4PIG Sus scrofa cDNA 3', mRNA sequence                                                                    |
| A_72_P413618 | INSR         | 1,3167 | 0,0033 | down | Sus scrofa insulin receptor (INSR), partial mRNA                                                                      |
| A_72_P247177 | SLCO2A1      | 1,3162 | 0,0263 | down | Sus scrofa solute carrier organic anion transporter family, member 2A1 (SLCO2A1), mRNA                                |
| A_72_P382313 | ARPC5        | 1,3160 | 0,0156 | down | Sus scrofa actin related protein 2/3 complex, subunit 5, 16kDa (ARPC5), mRNA                                          |
| A_72_P417964 |              | 1,3157 | 0,0265 | down | Sus scrofa mRNA, clone: OVRM10137D04, expressed in ovary                                                              |
| A_72_P367038 | TBL1XR1      | 1,3148 | 0,0083 | down | Sus scrofa transducin (beta)-like 1 X-linked receptor 1 (TBL1XR1), mRNA                                               |
| A_72_P117191 | RAB14        | 1,3144 | 0,0184 | down | Sus scrofa RAB14, member RAS oncogene family (RAB14), mRNA                                                            |
| A_72_P303424 | FBXO9        | 1,3134 | 0,0468 | down | Sus scrofa F-box protein 9 (FBXO9), mRNA                                                                              |
| A_72_P014366 |              | 1,3133 | 0,0115 | down | Sus scrofa mRNA, clone: OVRM10027E08, expressed in ovary                                                              |
| A_72_P034171 |              | 1,3126 | 0,0146 | down | Sus scrofa mRNA, clone: THY010038E04, expressed in thymus                                                             |
| A_72_P510691 | LOC106504487 | 1,3120 | 0,0146 | down | PREDICTED: Sus scrofa uncharacterized LOC106504487 (LOC106504487), ncRNA                                              |
| A_72_P188526 | YLPM1        | 1,3110 | 0,0319 | down | Sus scrofa YLP motif containing 1 (YLPM1), misc_RNA                                                                   |
| A_72_P606928 | TACC2        | 1,3101 | 0,0012 | down | Sus scrofa transforming, acidic coiled-coil containing protein 2 (TACC2), mRNA                                        |

|              |              |        |        |      |                                                                                                                     |
|--------------|--------------|--------|--------|------|---------------------------------------------------------------------------------------------------------------------|
| A_72_P316323 | SLC27A2      | 1,3099 | 0,0324 | down | Sus scrofa solute carrier family 27 (fatty acid transporter), member 2 (SLC27A2), mRNA                              |
| A_72_P070256 | PEA15        | 1,3099 | 0,0483 | down | Sus scrofa phosphoprotein enriched in astrocytes 15 (PEA15), mRNA                                                   |
| A_72_P313423 | RAB13        | 1,3098 | 0,0427 | down | Sus scrofa RAB13, member RAS oncogene family (RAB13), mRNA                                                          |
| A_72_P047556 | PKN2         | 1,3091 | 0,0290 | down | Sus scrofa protein kinase N2 (PKN2), mRNA                                                                           |
| A_72_P035891 | NR3C1        | 1,3090 | 0,0110 | down | Sus scrofa nuclear receptor subfamily 3, group C, member 1 (glucocorticoid receptor) (NR3C1), mRNA                  |
| A_72_P577099 | LGALS8       | 1,3087 | 0,0180 | down | Sus scrofa lectin, galactoside-binding, soluble, 8 (LGALS8), mRNA                                                   |
| A_72_P281539 |              | 1,3080 | 0,0143 | down | rese25c_k5.y1 ese Sus scrofa cDNA 5', mRNA sequence                                                                 |
| A_72_P251407 |              | 1,3076 | 0,0221 | down | BX670500 Sus Scrofa library (scac) Sus scrofa cDNA clone scac0032.f.19 5prim, mRNA sequence                         |
| A_72_P474362 | C4H1orf111   | 1,3071 | 0,0423 | down | Sus scrofa chromosome 4 open reading frame, human C1orf111 (C4H1orf111), mRNA                                       |
| A_72_P077531 | KLK1         | 1,3069 | 0,0091 | down | Sus scrofa kallikrein 1 (KLK1), mRNA                                                                                |
| A_72_P131871 | CLIC4        | 1,3067 | 0,0416 | down | PREDICTED: Sus scrofa chloride intracellular channel 4 (CLIC4), mRNA                                                |
| A_72_P416543 | ITGB7        | 1,3065 | 0,0033 | down | Sus scrofa integrin, beta 7 (ITGB7), mRNA                                                                           |
| A_72_P443294 | GSR          | 1,3064 | 0,0241 | down | Sus scrofa glutathione reductase (GSR), mRNA                                                                        |
| A_72_P073381 | SERPINB1     | 1,3053 | 0,0139 | down | Sus scrofa serpin peptidase inhibitor, clade B (ovalbumin), member 1 (SERPINB1), mRNA                               |
| A_72_P302874 |              | 1,3044 | 0,0246 | down | Sus scrofa mRNA for swine workshop cluster 3 antigen precursor (swc3 gene)                                          |
| A_72_P230337 | TNIP1        | 1,3037 | 0,0379 | down | Sus scrofa TNFAIP3 interacting protein 1 (TNIP1), mRNA                                                              |
| A_72_P127081 |              | 1,3032 | 0,0352 | down | DB820117 full-length enriched swine cDNA library, adult uterus Sus scrofa cDNA clone UTR010016D01 3', mRNA sequence |
| A_72_P182426 | TBC1D16      | 1,3028 | 0,0195 | down | Sus scrofa TBC1 domain family, member 16 (TBC1D16), mRNA                                                            |
| A_72_P296064 | MMAB         | 1,3024 | 0,0483 | down | Sus scrofa methylmalonic aciduria (cobalamin deficiency) cblB type (MMAB), mRNA                                     |
| A_72_P302944 | PPP1CC       | 1,3018 | 0,0385 | down | Sus scrofa protein phosphatase 1, catalytic subunit, gamma isozyme (PPP1CC), mRNA                                   |
| A_72_P033181 | CAMSAP2      | 1,3010 | 0,0475 | down | Sus scrofa calmodulin regulated spectrin-associated protein family, member 2 (CAMSAP2), mRNA                        |
| A_72_P232462 | PLDN         | 1,3009 | 0,0431 | down | Sus scrofa biogenesis of lysosomal organelles complex-1, subunit 6, pallidin (PLDN), mRNA                           |
| A_72_P555510 | CWF19L1      | 1,3007 | 0,0483 | down | Sus scrofa CWF19-like 1, cell cycle control (S. pombe) (CWF19L1), mRNA                                              |
| A_72_P529595 |              | 1,3004 | 0,0280 | down | Sus scrofa mRNA, clone: BMWN10069A01, expressed in bone marrow                                                      |
| A_72_P086861 |              | 1,2998 | 0,0380 | down | BX926795 Sus Scrofa library (scan) Sus scrofa cDNA clone scan0015.c.02 5prim, mRNA sequence                         |
| A_72_P489254 | NRBF2        | 1,2994 | 0,0236 | down | Sus scrofa nuclear receptor binding factor 2 (NRBF2), mRNA                                                          |
| A_72_P176621 | PSMB8        | 1,2993 | 0,0376 | down | Sus scrofa proteasome (prosome, macropain) subunit, beta type, 8 (large multifunctional peptidase 7) (PSMB8), mRNA  |
| A_72_P056426 | MORF4L1      | 1,2983 | 0,0062 | down | Sus scrofa mortality factor 4 like 1 (MORF4L1), mRNA                                                                |
| A_72_P058051 |              | 1,2979 | 0,0499 | down | BX918751 Sus Scrofa library (scan) Sus scrofa cDNA clone scan0035.d.14 5prim, mRNA sequence                         |
| A_72_P774098 | LOC100623243 | 1,2979 | 0,0494 | down | Sus scrofa protein phosphatase inhibitor 2-like (LOC100623243), partial mRNA                                        |
| A_72_P695489 |              | 1,2978 | 0,0385 | down | SusFleck_BF_0089_0092_5_pCNS_J02 SusFleck Backfat Sus scrofa cDNA clone 0089_0092_J02 5', mRNA sequence             |
| A_72_P709972 | CDKN3        | 1,2976 | 0,0268 | down | Sus scrofa cyclin-dependent kinase inhibitor 3 (CDKN3), mRNA                                                        |
| A_72_P443593 |              | 1,2968 | 0,0454 | down | Sus scrofa mRNA, clone:THY010001C01, expressed in thymus                                                            |
| A_72_P599943 | RNF115       | 1,2960 | 0,0070 | down | PREDICTED: Sus scrofa ring finger protein 115 (RNF115), mRNA                                                        |
| A_72_P207737 |              | 1,2953 | 0,0178 | down | 1497871 MARC 3PIG Sus scrofa cDNA 5', mRNA sequence                                                                 |
| A_72_P471686 | PDK1         | 1,2951 | 0,0483 | down | Sus scrofa pyruvate dehydrogenase kinase, isozyme 1 (PDK1), mRNA                                                    |
| A_72_P184436 | KDM3A        | 1,2950 | 0,0416 | down | Sus scrofa lysine (K)-specific demethylase 3A (KDM3A), mRNA                                                         |
| A_72_P088561 | IL13RA1      | 1,2948 | 0,0022 | down | Sus scrofa interleukin 13 receptor, alpha 1 (IL13RA1), mRNA                                                         |
| A_72_P413063 |              | 1,2939 | 0,0469 | down | 1544251 MARC 3PIG Sus scrofa cDNA 5', mRNA sequence                                                                 |
| A_72_P564112 | GPX1         | 1,2939 | 0,0248 | down | Sus scrofa glutathione peroxidase 1 (GPX1), mRNA                                                                    |
| A_72_P384373 | JAK3         | 1,2936 | 0,0495 | down | Sus scrofa Janus kinase 3 (JAK3), mRNA                                                                              |
| A_72_P715808 | MTIF3        | 1,2936 | 0,0408 | down | Sus scrofa mitochondrial translational initiation factor 3 (MTIF3), mRNA                                            |
| A_72_P122941 | MICU3        | 1,2915 | 0,0383 | down | Sus scrofa mitochondrial calcium uptake family, member 3 (MICU3), mRNA                                              |
| A_72_P506055 | SBNO1        | 1,2915 | 0,0006 | down | PREDICTED: Sus scrofa strawberry notch homolog 1 (Drosophila) (SBNO1), mRNA                                         |
| A_72_P044976 | FOXP1        | 1,2914 | 0,0055 | down | Sus scrofa forkhead box P1 (FOXP1), mRNA                                                                            |
| A_72_P088511 | IL4R         | 1,2903 | 0,0198 | down | Sus scrofa interleukin 4 receptor (IL4R), mRNA                                                                      |
| A_72_P013976 | KIAA1328     | 1,2901 | 0,0312 | down | Sus scrofa KIAA1328 ortholog (KIAA1328), mRNA                                                                       |
| A_72_P153056 |              | 1,2894 | 0,0217 | down | rpliv0125_b4.y1 liv Sus scrofa cDNA 5', mRNA sequence                                                               |
| A_72_P297509 |              | 1,2868 | 0,0096 | down | 143793 MARC 1PIG Sus scrofa cDNA 5', mRNA sequence                                                                  |
| A_72_P179986 |              | 1,2854 | 0,0462 | down | Sus scrofa mRNA, clone: PST010076A06, expressed in prostate                                                         |
| A_72_P002551 |              | 1,2846 | 0,0319 | down | 1106882 MARC 4PIG Sus scrofa cDNA 5', mRNA sequence                                                                 |
| A_72_P387078 |              | 1,2845 | 0,0307 | down | MI-P-H5-ae-c-02-1-UM.s1.ab1 MI-P-H5 Sus scrofa cDNA clone MI-P-H5-ae-c-02-1-UM.ab1 3', mRNA sequence                |
| A_72_P245102 |              | 1,2841 | 0,0167 | down | Sus scrofa tribbles-like protein 1 mRNA, partial cds                                                                |
| A_72_P125706 | CYBRD1       | 1,2839 | 0,0445 | down | Sus scrofa cytochrome b reductase 1 (CYBRD1), mRNA                                                                  |
| A_72_P709552 | PPP1R2       | 1,2832 | 0,0424 | down | PREDICTED: Sus scrofa protein phosphatase 1, regulatory (inhibitor) subunit 2 (PPP1R2), mRNA                        |
| A_72_P048986 |              | 1,2832 | 0,0150 | down | AJ957852 KN404_2 Sus scrofa cDNA clone C0007751I03 5', mRNA sequence                                                |
| A_72_P037856 | ADAMTS15     | 1,2829 | 0,0405 | down | Sus scrofa ADAM metalloproteinase with thrombospondin type 1 motif, 15 (ADAMTS15), mRNA                             |
| A_72_P153251 | PDE4A        | 1,2814 | 0,0406 | down | Sus scrofa phosphodiesterase 4A, cAMP-specific (PDE4A), mRNA                                                        |
| A_72_P361503 | WHAMM        | 1,2810 | 0,0356 | down | Sus scrofa WAS protein homolog associated with actin, golgi membranes and microtubules (WHAMM), mRNA                |
| A_72_P071241 |              | 1,2796 | 0,0046 | down | BP439735 full-length enriched swine cDNA library, adult lung Sus scrofa cDNA clone LNG010067G10 5', mRNA sequence   |
| A_72_P141811 | NR2C2        | 1,2795 | 0,0441 | down | Sus scrofa nuclear receptor subfamily 2, group C, member 2 (NR2C2), mRNA                                            |
| A_72_P441639 | MYOC         | 1,2789 | 0,0389 | down | Sus scrofa myocilin, trabecular meshwork inducible glucocorticoid response (MYOC), mRNA                             |
| A_72_P707028 |              | 1,2784 | 0,0483 | down |                                                                                                                     |
| A_72_P613562 | ANP32B       | 1,2776 | 0,0193 | down | Sus scrofa acidic (leucine-rich) nuclear phosphoprotein 32 family, member B (ANP32B), mRNA                          |
| A_72_P079841 | AIFM2        | 1,2774 | 0,0188 | down | Sus scrofa apoptosis-inducing factor, mitochondrion-associated, 2 (AIFM2), mRNA                                     |
| A_72_P114836 |              | 1,2769 | 0,0387 | down | 1550885 MARC 3PIG Sus scrofa cDNA 5', mRNA sequence                                                                 |
| A_72_P381778 |              | 1,2762 | 0,0263 | down | 1143198 MARC 4PIG Sus scrofa cDNA 3', mRNA sequence                                                                 |
| A_72_P419849 |              | 1,2756 | 0,0443 | down |                                                                                                                     |
| A_72_P037936 | LTBP2        | 1,2743 | 0,0390 | down | Sus scrofa latent transforming growth factor beta binding protein 2 (LTBP2), mRNA                                   |
| A_72_P442821 | FFAR1        | 1,2737 | 0,0162 | down | Sus scrofa free fatty acid receptor 1 (FFAR1), mRNA                                                                 |
| A_72_P306154 |              | 1,2737 | 0,0018 | down | Sus scrofa mRNA, clone:CLNT10003B02, expressed in colon                                                             |
| A_72_P705820 |              | 1,2736 | 0,0249 | down |                                                                                                                     |

|              |              |        |        |      |                                                                                                                        |
|--------------|--------------|--------|--------|------|------------------------------------------------------------------------------------------------------------------------|
| A_72_P382613 |              | 1,2733 | 0,0082 | down | AJ942500 CSEQRAN17 Sus scrofa cDNA clone C0007305b11 5', mRNA sequence                                                 |
| A_72_P442282 | STAT5A       | 1,2718 | 0,0376 | down | Sus scrofa signal transducer and activator of transcription 5A (STAT5A), mRNA                                          |
| A_72_P013806 | TARS         | 1,2716 | 0,0470 | down | PREDICTED: Sus scrofa threonyl-tRNA synthetase (TARS), mRNA                                                            |
| A_72_P661674 | DNMT3A       | 1,2705 | 0,0447 | down | Sus scrofa DNA (cytosine-5-)-methyltransferase 3 alpha (DNMT3A), mRNA                                                  |
| A_72_P705849 | EIF2B2       | 1,2701 | 0,0031 | down | Sus scrofa eukaryotic translation initiation factor 2B, subunit 2 beta, 39kDa (EIF2B2), mRNA                           |
| A_72_P435029 |              | 1,2700 | 0,0304 | down | Sus scrofa mRNA, clone:OVRM10137D04, expressed in ovary                                                                |
| A_72_P070206 | GBI1         | 1,2663 | 0,0129 | down | Sus scrofa GBI1 protein (GBI1), mRNA                                                                                   |
| A_72_P084201 |              | 1,2651 | 0,0045 | down | rfat0113_j3.y1 fat Sus scrofa cDNA 5', mRNA sequence                                                                   |
| A_72_P328576 | SLC31A2      | 1,2639 | 0,0074 | down | Sus scrofa solute carrier family 31 (copper transporters), member 2 (SLC31A2), mRNA                                    |
| A_72_P287029 | PPP1R9B      | 1,2632 | 0,0396 | down | Sus scrofa protein phosphatase 1, regulatory subunit 9B (PPP1R9B), mRNA                                                |
| A_72_P114076 | C2H19orf38   | 1,2624 | 0,0216 | down | Sus scrofa chromosome 2 open reading frame, human C19orf38 (C2H19orf38), mRNA                                          |
| A_72_P489024 | GGPS1        | 1,2611 | 0,0406 | down | Sus scrofa geranylgeranyl diphosphate synthase 1 (GGPS1), mRNA                                                         |
| A_72_P085261 |              | 1,2608 | 0,0471 | down | sto213_m24.z1 sto Sus scrofa cDNA 5', mRNA sequence                                                                    |
| A_72_P536281 | IRF1         | 1,2608 | 0,0474 | down | Sus scrofa interferon regulatory factor 1 (IRF1), mRNA                                                                 |
| A_72_P518788 | RBMX         | 1,2608 | 0,0145 | down | Sus scrofa RNA binding motif protein, X-linked (RBMX), mRNA                                                            |
| A_72_P209107 |              | 1,2607 | 0,0441 | down | 260763 MARC 2PIG Sus scrofa cDNA 5', mRNA sequence                                                                     |
| A_72_P383398 |              | 1,2607 | 0,0199 | down | Sus scrofa mRNA, clone:TCH010019E09, expressed in trachea                                                              |
| A_72_P440606 | C-FLIP       | 1,2606 | 0,0199 | down | Sus scrofa cellular FLICE-like inhibitory protein (C-FLIP), mRNA                                                       |
| A_72_P303044 | GNAQ         | 1,2591 | 0,0046 | down | Sus scrofa guanine nucleotide binding protein (G protein), q polypeptide (GNAQ), mRNA                                  |
| A_72_P641109 | GRN          | 1,2589 | 0,0380 | down | Sus scrofa granulin (GRN), mRNA                                                                                        |
| A_72_P194322 | ATF6         | 1,2587 | 0,0023 | down | Sus scrofa activating transcription factor 6 (ATF6), partial mRNA                                                      |
| A_72_P427449 | ATXN2L       | 1,2578 | 0,0058 | down | Sus scrofa ataxin 2-like (ATXN2L), mRNA                                                                                |
| A_72_P177501 | TKT          | 1,2574 | 0,0408 | down | Sus scrofa transketolase (TKT), mRNA                                                                                   |
| A_72_P063506 |              | 1,2564 | 0,0439 | down | HX225919 full-length enriched swine cDNA library, adult hypothalamus Sus scrofa cDNA clone HTMT10141D08, mRNA sequence |
| A_72_P579028 | RNF115       | 1,2550 | 0,0316 | down | PREDICTED: Sus scrofa ring finger protein 115 (RNF115), mRNA                                                           |
| A_72_P440351 | FOXO3        | 1,2549 | 0,0404 | down | Sus scrofa forkhead box O3 (FOXO3), mRNA                                                                               |
| A_72_P262032 |              | 1,2547 | 0,0121 | down | 1543878 MARC 3PIG Sus scrofa cDNA 5', mRNA sequence                                                                    |
| A_72_P539428 | HSD17B8      | 1,2521 | 0,0185 | down | Sus scrofa hydroxysteroid (17-beta) dehydrogenase 8 (HSD17B8), mRNA                                                    |
| A_72_P674666 | TNFSF13B     | 1,2519 | 0,0196 | down | Sus scrofa tumor necrosis factor (ligand) superfamily, member 13b (TNFSF13B), mRNA                                     |
| A_72_P495140 | ATP6V1G1     | 1,2516 | 0,0181 | down | Sus scrofa ATPase, H+ transporting, lysosomal 13kDa, V1 subunit G1 (ATP6V1G1), mRNA                                    |
| A_72_P618830 | ANAPC16      | 1,2509 | 0,0334 | down | Sus scrofa anaphase promoting complex subunit 16 (ANAPC16), mRNA                                                       |
| A_72_P340418 |              | 1,2507 | 0,0249 | down | 908928 MARC 4PIG Sus scrofa cDNA 5', mRNA sequence                                                                     |
| A_72_P747855 | SLC22A15     | 1,2502 | 0,0416 | down | Sus scrofa solute carrier family 22, member 15 (SLC22A15), mRNA                                                        |
| A_72_P345928 | LOC100624357 | 1,2502 | 0,0427 | down | Sus scrofa nuclear valosin-containing protein-like (LOC100624357), misc RNA                                            |
| A_72_P101616 |              | 1,2494 | 0,0279 | down | rnmm32c_i4.y1 nmm Sus scrofa cDNA 5', mRNA sequence                                                                    |
| A_72_P424724 | UBR5         | 1,2491 | 0,0047 | down | Sus scrofa ubiquitin protein ligase E3 component n-recognin 5 (UBR5), mRNA                                             |
| A_72_P080211 | CATSPER2     | 1,2489 | 0,0312 | down | Sus scrofa cation channel, sperm associated 2 (CATSPER2), mRNA                                                         |
| A_72_P382523 |              | 1,2478 | 0,0164 | down | 907587 MARC 4PIG Sus scrofa cDNA 3', mRNA sequence                                                                     |
| A_72_P207462 | PHF21A       | 1,2477 | 0,0140 | down | Sus scrofa PHD finger protein 21A (PHF21A), mRNA                                                                       |
| A_72_P419709 |              | 1,2471 | 0,0035 | down | Pig DNA sequence from clone CH242-452E5 on chromosome 4, complete sequence                                             |
| A_72_P432109 | C4H1orf85    | 1,2464 | 0,0178 | down | Sus scrofa chromosome 4 open reading frame, human C1orf85 (C4H1orf85), mRNA                                            |
| A_72_P358463 |              | 1,2461 | 0,0301 | down | Sus scrofa mRNA, clone:OVRM10190F12, expressed in ovary                                                                |
| A_72_P055926 | LOC100627731 | 1,2456 | 0,0212 | down | Sus scrofa zinc finger and BTB domain-containing protein 41-like (LOC100627731), mRNA                                  |
| A_72_P017441 | ARV1         | 1,2441 | 0,0014 | down | Sus scrofa ARV1 homolog (S. cerevisiae) (ARV1), mRNA                                                                   |
| A_72_P381068 | NAV2         | 1,2434 | 0,0328 | down | PREDICTED: Sus scrofa neuron navigator 2 (NAV2), transcript variant X1, mRNA                                           |
| A_72_P391333 | LOC100627422 | 1,2431 | 0,0403 | down | Sus scrofa ligand-dependent corepressor-like (LOC100627422), mRNA                                                      |
| A_72_P158011 | FXR2         | 1,2429 | 0,0044 | down | Sus scrofa fragile X mental retardation, autosomal homolog 2 (FXR2), mRNA                                              |
| A_72_P085691 | RNF219       | 1,2429 | 0,0207 | down | Sus scrofa ring finger protein 219 (RNF219), mRNA                                                                      |
| A_72_P258557 |              | 1,2423 | 0,0270 | down | Sus scrofa mRNA, clone:OVR010070G03, expressed in ovary                                                                |
| A_72_P278734 | ZNF398       | 1,2418 | 0,0300 | down | Sus scrofa zinc finger protein 398 (ZNF398), mRNA                                                                      |
| A_72_P084306 | LOC100524673 | 1,2406 | 0,0059 | down | Sus scrofa dnaJ homolog subfamily C member 18-like (LOC100524673), mRNA                                                |
| A_72_P017616 |              | 1,2406 | 0,0203 | down | 830262 MARC 3PIG Sus scrofa cDNA 3', mRNA sequence                                                                     |
| A_72_P477002 | CDKN1A       | 1,2399 | 0,0303 | down | Sus scrofa cyclin-dependent kinase inhibitor 1A (p21, Cip1) (CDKN1A), mRNA                                             |
| A_72_P178276 |              | 1,2384 | 0,0496 | down | 1103934 MARC 4PIG Sus scrofa cDNA 3', mRNA sequence                                                                    |
| A_72_P335073 | SUPT3H       | 1,2381 | 0,0301 | down | Sus scrofa suppressor of Ty 3 homolog (S. cerevisiae) (SUPT3H), mRNA                                                   |
| A_72_P358648 |              | 1,2375 | 0,0178 | down | Select seq gb EW492796.2                                                                                               |
| A_72_P078761 | APP          | 1,2372 | 0,0467 | down | Sus scrofa amyloid beta (A4) precursor protein (APP), mRNA                                                             |
| A_72_P489169 | CSGALNACT2   | 1,2368 | 0,0102 | down | Sus scrofa chondroitin sulfate N-acetylgalactosaminyltransferase 2 (CSGALNACT2), mRNA                                  |
| A_72_P443517 | LOC100156127 | 1,2351 | 0,0440 | down | PREDICTED: Sus scrofa histone H2B type 1-M (LOC100156127), mRNA                                                        |
| A_72_P531339 | SART3        | 1,2348 | 0,0014 | down | Sus scrofa squamous cell carcinoma antigen recognized by T cells 3 (SART3), mRNA                                       |
| A_72_P404833 | ARHGEF3      | 1,2348 | 0,0474 | down | Sus scrofa Rho guanine nucleotide exchange factor (GEF) 3 (ARHGEF3), partial mRNA                                      |
| A_72_P005156 | RNF8         | 1,2341 | 0,0229 | down | Sus scrofa ring finger protein 8, E3 ubiquitin protein ligase (RNF8), mRNA                                             |
| A_72_P042071 | EEF2K        | 1,2331 | 0,0050 | down | Sus scrofa eukaryotic elongation factor-2 kinase (EEF2K), mRNA                                                         |
| A_72_P311993 |              | 1,2329 | 0,0048 | down | AJ963025 KN404_2 Sus scrofa cDNA clone C0007756b05 5', mRNA sequence                                                   |
| A_72_P477541 | EFTUD1       | 1,2312 | 0,0441 | down | Sus scrofa elongation factor Tu GTP binding domain containing 1 (EFTUD1), mRNA                                         |
| A_72_P305319 | SCAMP1       | 1,2311 | 0,0459 | down | Sus scrofa secretory carrier membrane protein 1 (SCAMP1), mRNA                                                         |
| A_72_P200477 | TRAF3        | 1,2308 | 0,0378 | down | Sus scrofa TNF receptor-associated factor 3 (TRAF3), mRNA                                                              |
| A_72_P313643 | ASS1         | 1,2301 | 0,0171 | down | Sus scrofa argininosuccinate synthase 1 (ASS1), mRNA                                                                   |
| A_72_P213607 | DECR1        | 1,2297 | 0,0017 | down | Sus scrofa 2,4-dienoyl CoA reductase 1, mitochondrial (DECR1), mRNA                                                    |
| A_72_P017466 | NR2E3        | 1,2294 | 0,0462 | down | PREDICTED: Sus scrofa nuclear receptor subfamily 2, group E, member 3 (NR2E3), mRNA                                    |
| A_72_P244692 | SIRT2        | 1,2273 | 0,0216 | down | Sus scrofa sirtuin 2 (SIRT2), mRNA                                                                                     |

|              |              |        |        |      |                                                                                                                         |
|--------------|--------------|--------|--------|------|-------------------------------------------------------------------------------------------------------------------------|
| A_72_P397378 | SNAP29       | 1,2268 | 0,0402 | down | Sus scrofa synaptosomal-associated protein, 29kDa (SNAP29), mRNA                                                        |
| A_72_P227707 | MAP3K2       | 1,2258 | 0,0105 | down | PREDICTED: Sus scrofa mitogen-activated protein kinase kinase kinase 2 (MAP3K2), transcript variant X1, mRNA            |
| A_72_P442415 |              | 1,2240 | 0,0321 | down | Sus scrofa mRNA, clone: PST010043A06, expressed in prostate                                                             |
| A_72_P006596 | GNG12        | 1,2236 | 0,0033 | down | Sus scrofa guanine nucleotide binding protein (G protein), gamma 12 (GNG12), mRNA                                       |
| A_72_P279819 |              | 1,2221 | 0,0170 | down | CJ006204 full-length enriched swine cDNA library, adult liver Sus scrofa cDNA clone LVRM1D080189 5', mRNA sequence      |
| A_72_P593749 |              | 1,2219 | 0,0155 | down | Sus scrofa mRNA, clone: OVR010034B01, expressed in ovary                                                                |
| A_72_P093036 |              | 1,2214 | 0,0244 | down | BX673967 Sus Scrofa library (scac) Sus scrofa cDNA clone scac0044.i.23 5prim, mRNA sequence                             |
| A_72_P430939 | SUN2         | 1,2199 | 0,0361 | down | Sus scrofa Sad1 and UNC84 domain containing 2 (SUN2), mRNA                                                              |
| A_72_P340658 | SLC16A7      | 1,2196 | 0,0358 | down | Sus scrofa solute carrier family 16, member 7 (monocarboxylic acid transporter 2) (SLC16A7), mRNA                       |
| A_72_P161131 | LPCAT1       | 1,2189 | 0,0288 | down | Sus scrofa lysophosphatidylcholine acyltransferase 1 (LPCAT1), mRNA                                                     |
| A_72_P211432 | ANKFY1       | 1,2173 | 0,0033 | down | Sus scrofa ankyrin repeat and FYVE domain containing 1 (ANKFY1), mRNA                                                   |
| A_72_P200872 |              | 1,2169 | 0,0052 | down | Sus scrofa mRNA, clone: OVRM10001G04, expressed in ovary                                                                |
| A_72_P386773 | MCOLN1       | 1,2166 | 0,0203 | down | Sus scrofa mucolipin 1 (MCOLN1), mRNA                                                                                   |
| A_72_P275939 | MYO9B        | 1,2163 | 0,0059 | down | Sus scrofa myosin IXB (MYO9B), mRNA                                                                                     |
| A_72_P305579 | MLC1         | 1,2155 | 0,0089 | down | Sus scrofa megalencephalic leukoencephalopathy with subcortical cysts 1 (MLC1), mRNA                                    |
| A_72_P606248 | PI4KA        | 1,2152 | 0,0499 | down | Sus scrofa phosphatidylinositol 4-kinase, catalytic, alpha (PI4KA), mRNA                                                |
| A_72_P471478 | TBR1         | 1,2150 | 0,0056 | down | Sus scrofa T-box, brain, 1 (TBR1), mRNA                                                                                 |
| A_72_P010806 | FBXW4        | 1,2147 | 0,0271 | down | Sus scrofa F-box and WD repeat domain containing 4 (FBXW4), mRNA                                                        |
| A_72_P626578 | ARPC1B       | 1,2133 | 0,0035 | down | Sus scrofa actin related protein 2/3 complex, subunit 1B, 41kDa (ARPC1B), mRNA                                          |
| A_72_P747726 | TMEM66       | 1,2129 | 0,0370 | down | Sus scrofa transmembrane protein 66 (TMEM66), mRNA                                                                      |
| A_72_P290489 | PDE6D        | 1,2127 | 0,0130 | down | Sus scrofa phosphodiesterase 6D, cGMP-specific, rod, delta (PDE6D), mRNA                                                |
| A_72_P408258 | PRPS2        | 1,2124 | 0,0046 | down | Sus scrofa phosphoribosyl pyrophosphate synthetase 2 (PRPS2), mRNA                                                      |
| A_72_P246212 |              | 1,2117 | 0,0125 | down | Pig DNA sequence from clone CH242-488P24 on chromosome X, complete sequence                                             |
| A_72_P376858 | ZNF750       | 1,2116 | 0,0307 | down | Sus scrofa zinc finger protein 750 (ZNF750), mRNA                                                                       |
| A_72_P072351 |              | 1,2111 | 0,0029 | down | rthg22_p14.y1 thg Sus scrofa cDNA 5', mRNA sequence                                                                     |
| A_72_P444508 | PMAIP1       | 1,2111 | 0,0203 | down | Sus scrofa phorbol-12-myristate-13-acetate-induced protein 1 (PMAIP1), mRNA                                             |
| A_72_P363908 | LOC102158955 | 1,2109 | 0,0199 | down | Sus scrofa kinesin-like protein KIF3C-like (LOC102158955), mRNA                                                         |
| A_72_P127566 | TBC1D20      | 1,2104 | 0,0262 | down | Sus scrofa TBC1 domain family, member 20 (TBC1D20), mRNA                                                                |
| A_72_P330073 | MAP3K13      | 1,2104 | 0,0363 | down | Sus scrofa mitogen-activated protein kinase kinase kinase 13 (MAP3K13), mRNA                                            |
| A_72_P287369 | KEAP1        | 1,2089 | 0,0039 | down | Sus scrofa kelch-like ECH-associated protein 1 (KEAP1), mRNA                                                            |
| A_72_P367918 |              | 1,2082 | 0,0307 | down | 1496071 MARC 3PIG Sus scrofa cDNA 3', mRNA sequence                                                                     |
| A_72_P007406 | SUV420H1     | 1,2079 | 0,0148 | down | Sus scrofa suppressor of variegation 4-20 homolog 1 (Drosophila) (SUV420H1), mRNA                                       |
| A_72_P201467 | TRPS1        | 1,2069 | 0,0089 | down | Sus scrofa trichorhinophalangeal syndrome I (TRPS1), mRNA                                                               |
| A_72_P166401 | LOC106510442 | 1,2068 | 0,0108 | down | PREDICTED: Sus scrofa ankyrin repeat domain-containing protein 11-like (LOC106510442), mRNA                             |
| A_72_P389948 | SCAF8        | 1,2065 | 0,0378 | down | Sus scrofa SR-related CTD-associated factor 8 (SCAF8), mRNA                                                             |
| A_72_P276334 |              | 1,2059 | 0,0065 | down | rcly14b_n5.y1 cly Sus scrofa cDNA 5', mRNA sequence                                                                     |
| A_72_P632976 | KDM2A        | 1,2053 | 0,0154 | down | Sus scrofa lysine (K)-specific demethylase 2A (KDM2A), mRNA                                                             |
| A_72_P027311 | FRMD8        | 1,2051 | 0,0079 | down | Sus scrofa FERM domain containing 8 (FRMD8), mRNA                                                                       |
| A_72_P088786 | ST3GAL4      | 1,2046 | 0,0349 | down | Sus scrofa ST3 beta-galactoside alpha-2,3-sialyltransferase 4 (ST3GAL4), mRNA                                           |
| A_72_P283429 | NMRK1        | 1,2040 | 0,0463 | down | Sus scrofa nicotinamide riboside kinase 1 (NMRK1), mRNA                                                                 |
| A_72_P738383 | C17H8orf40   | 1,2030 | 0,0193 | down | Sus scrofa chromosome 8 open reading frame 40 (C17H8orf40), mRNA                                                        |
| A_72_P325153 |              | 1,2030 | 0,0050 | down | rpigcf0_004944.y1 ctf Sus scrofa cDNA 5', mRNA sequence                                                                 |
| A_72_P298589 | SLCO4C1      | 1,2025 | 0,0410 | down | Sus scrofa solute carrier organic anion transporter family, member 4C1 (SLCO4C1), mRNA                                  |
| A_72_P001941 | PHLDB2       | 1,2021 | 0,0188 | down | Sus scrofa pleckstrin homology-like domain, family B, member 2 (PHLDB2), partial mRNA                                   |
| A_72_P290554 | RAD52        | 1,2016 | 0,0365 | down | Sus scrofa RAD52 homolog (S. cerevisiae) (RAD52), mRNA                                                                  |
| A_72_P300064 |              | 1,2006 | 0,0146 | down | 942373 MARC 4PIG Sus scrofa cDNA 5', mRNA sequence                                                                      |
| A_72_P626952 | PSMD4        | 1,1996 | 0,0064 | down | Sus scrofa proteasome (prosome, macropain) 26S subunit, non-ATPase, 4 (PSMD4), mRNA [NM_001044535]                      |
| A_72_P116231 |              | 1,1995 | 0,0164 | down | Rep: Conserved protein - Propionibacterium acnes, partial (10%) [TC550429]                                              |
| A_72_P492650 |              | 1,1990 | 0,0474 | down |                                                                                                                         |
| A_72_P074296 | TAB2         | 1,1985 | 0,0276 | down | TGF-beta activated kinase 1/MAP3K7 binding protein 2 [Source:HGNC Symbol;Acc:17075] [ENSSSCT00000034966]                |
| A_72_P416997 |              | 1,1971 | 0,0358 | down |                                                                                                                         |
| A_72_P192006 |              | 1,1960 | 0,0371 | down | Sus scrofa mRNA, clone: HTMT10014F06, expressed in hypothalamus. [AK391669]                                             |
| A_72_P442544 |              | 1,1952 | 0,0126 | down | Uncharacterized protein [Source:UniProtKB/TrEMBL;Acc:F1RUR6] [ENSSSCT00000012152]                                       |
| A_72_P535819 | PPP2R5A      | 1,1951 | 0,0270 | down | Sus scrofa protein phosphatase 2, regulatory subunit B', alpha (PPP2R5A), mRNA [NM_001100192]                           |
| A_72_P143206 |              | 1,1947 | 0,0272 | down | PDUts1060G01 Porcine testis cDNA library I Sus scrofa cDNA clone PDUts1060G01 5' similar to homologue to emb [CV868904] |
| A_72_P613851 | CKMT2        | 1,1946 | 0,0419 | down | Sus scrofa creatine kinase, mitochondrial 2 (sarcomeric) (CKMT2), mRNA [NM_001044551]                                   |
| A_72_P068911 | LAMP-1       | 1,1937 | 0,0412 | down | Sus scrofa mRNA, clone: OVR010041H06, expressed in ovary. [AK347488]                                                    |
| A_72_P564219 | TPM3         | 1,1933 | 0,0457 | down | Sus scrofa tropomyosin 3 (TPM3), mRNA [NM_001001632]                                                                    |
| A_72_P738682 | APP          | 1,1928 | 0,0021 | down | Sus scrofa amyloid beta (A4) precursor protein (APP), mRNA [NM_214372]                                                  |
| A_72_P375023 | ZNF692       | 1,1927 | 0,0289 | down | zinc finger protein 692 [Source:HGNC Symbol;Acc:26049] [ENSSSCT00000024881]                                             |
| A_72_P443639 | HIST1H2BD    | 1,1922 | 0,0180 | down | Sus scrofa histone cluster 1, H2bd (HIST1H2BD), mRNA [NM_001243656]                                                     |
| A_72_P748776 | C-FLIP       | 1,1914 | 0,0052 | down | Sus scrofa cellular FLICE-like inhibitory protein (C-FLIP), mRNA [NM_001001628]                                         |
| A_72_P091001 | CHD3         | 1,1911 | 0,0435 | down | Uncharacterized protein [Source:UniProtKB/TrEMBL;Acc:F1ST12] [ENSSSCT00000019548]                                       |
| A_72_P639144 |              | 1,1910 | 0,0113 | down | CAP-GLY domain containing linker protein 1 [Source:HGNC Symbol;Acc:10461] [ENSSSCT00000010735]                          |
| A_72_P606643 | GLUL         | 1,1905 | 0,0410 | down | Sus scrofa glutamate-ammonia ligase (GLUL), mRNA. [Source:RefSeq mRNA;Acc:NM_213909] [ENSSSCT00000016935]               |
| A_72_P144036 |              | 1,1902 | 0,0463 | down | Rep: Undifferentiated embryonic cell transcription factor 1 - Homo sapiens (Human), partial (28%) [TC599898]            |

|              |           |        |        |      |                                                                                                                                                           |
|--------------|-----------|--------|--------|------|-----------------------------------------------------------------------------------------------------------------------------------------------------------|
| A_72_P489851 | TNKS2     | 1,1901 | 0,0102 | down | tankyrase, TRF1-interacting ankyrin-related ADP-ribose polymerase 2 [Source:HGNC Symbol;Acc:15677] [ENSSSCT00000011453]                                   |
| A_72_P091116 |           | 1,1882 | 0,0311 | down |                                                                                                                                                           |
| A_72_P506040 |           | 1,1880 | 0,0333 | down | coiled-coil serine-rich protein 2 [Source:HGNC Symbol;Acc:29197] [ENSSSCT00000011332]                                                                     |
| A_72_P507038 | IL17RE    | 1,1880 | 0,0103 | down | interleukin 17 receptor E [Source:HGNC Symbol;Acc:18439] [ENSSSCT00000032890]                                                                             |
| A_72_P025521 |           | 1,1879 | 0,0492 | down | Sus scrofa mRNA, clone:SKNB10069F06, expressed in skin. [AK349843]                                                                                        |
| A_72_P543792 | ST3GAL4   | 1,1875 | 0,0200 | down | Sus scrofa ST3 beta-galactoside alpha-2,3-sialyltransferase 4 (ST3GAL4), mRNA [NM_213757]                                                                 |
| DCP_1_2      |           | 1,1851 | 0,0353 | down | Unknown                                                                                                                                                   |
| A_72_P364188 | APP       | 1,1849 | 0,0170 | down | Sus scrofa amyloid beta (A4) precursor protein (APP), mRNA [NM_214372]                                                                                    |
| A_72_P131436 |           | 1,1847 | 0,0491 | down | Rep: Extracellular solute-binding protein family 5 precursor - Ochrobactrum anthropi (strain ATCC 49188 / DSM 6882 / NCTC 12168), partial (4%) [TC569637] |
| A_72_P153526 | ACTN1     | 1,1830 | 0,0281 | down | Sus scrofa actinin, alpha 1 (ACTN1), mRNA [NM_001243061]                                                                                                  |
| A_72_P739076 | APP       | 1,1827 | 0,0345 | down | Sus scrofa amyloid beta (A4) precursor protein (APP), mRNA [NM_214372]                                                                                    |
| A_72_P165661 | RBM38     | 1,1825 | 0,0195 | down | Sus scrofa RNA binding motif protein 38 (RBM38), mRNA [NM_001105312]                                                                                      |
| A_72_P223322 | LOC780415 | 1,1810 | 0,0324 | down | Sus scrofa interferon regulatory factor 9 (LOC780415), mRNA [NM_001078670]                                                                                |
| A_72_P728808 | INTS6     | 1,1809 | 0,0046 | down | integrator complex subunit 6 [Source:HGNC Symbol;Acc:14879] [ENSSSCT00000010282]                                                                          |
| A_72_P254612 | YBX3      | 1,1805 | 0,0387 | down | Y box binding protein 3 [Source:HGNC Symbol;Acc:2428] [ENSSSCT00000000680]                                                                                |
| A_72_P431694 |           | 1,1800 | 0,0251 | down | 947694 MARC 4PIG Sus scrofa cDNA 5', mRNA sequence [CN158867]                                                                                             |
| A_72_P165271 | IKBK      | 1,1789 | 0,0308 | down | Sus scrofa inhibitor of kappa light polypeptide gene enhancer in B-cells, kinase gamma (IKBK), mRNA [NM_001113053]                                        |
| A_72_P231872 | NIT1      | 1,1769 | 0,0201 | down | nitrilase 1 [Source:HGNC Symbol;Acc:7828] [ENSSSCT00000006974]                                                                                            |
| A_72_P332563 |           | 1,1769 | 0,0277 | down | Uncharacterized protein [Source:UniProtKB/TrEMBL;Acc:F1RRJ6] [ENSSSCT00000001879]                                                                         |
| A_72_P479388 | TRAF3     | 1,1768 | 0,0217 | down | Uncharacterized protein [Source:UniProtKB/TrEMBL;Acc:F1SA11] [ENSSSCT00000002804]                                                                         |
| A_72_P718358 | APP       | 1,1768 | 0,0479 | down | Sus scrofa amyloid beta (A4) precursor protein (APP), mRNA [NM_214372]                                                                                    |
| A_72_P253542 | EPS15     | 1,1764 | 0,0403 | down | epidermal growth factor receptor pathway substrate 15 [Source:HGNC Symbol;Acc:3419] [ENSSSCT00000004284]                                                  |
| A_72_P194702 | SNAPC5    | 1,1761 | 0,0495 | down | small nuclear RNA activating complex, polypeptide 5, 19kDa [Source:HGNC Symbol;Acc:15484] [ENSSSCT00000025296]                                            |
| A_72_P657188 | COL5A2    | 1,1761 | 0,0149 | down | Sus scrofa collagen, type V, alpha 2 (COL5A2), mRNA [NM_001105289]                                                                                        |
| A_72_P332828 |           | 1,1760 | 0,0485 | down |                                                                                                                                                           |
| A_72_P550426 | TM2D2     | 1,1760 | 0,0316 | down | Sus scrofa TM2 domain containing 2 (TM2D2), mRNA [NM_001244627]                                                                                           |
| A_72_P040086 | ZBTB7A    | 1,1755 | 0,0387 | down | zinc finger and BTB domain containing 7A [Source:HGNC Symbol;Acc:18078] [ENSSSCT00000028851]                                                              |
| A_72_P097051 | SH2B3     | 1,1750 | 0,0372 | down | SH2B adaptor protein 3 [Source:HGNC Symbol;Acc:29605] [ENSSSCT00000034933]                                                                                |
| A_72_P345513 |           | 1,1714 | 0,0351 | down | Rep: Brain protein I3 - Bos taurus (Bovine), complete [TC534832]                                                                                          |
| A_72_P251322 |           | 1,1714 | 0,0165 | down | E1A binding protein p400 [Source:HGNC Symbol;Acc:11958] [ENSSSCT00000027939]                                                                              |
| A_72_P138971 |           | 1,1705 | 0,0394 | down | rpfc0135_a20.y1 fco Sus scrofa cDNA 5', mRNA sequence [EW190742]                                                                                          |
| A_72_P601263 | KLF13     | 1,1704 | 0,0277 | down | Sus scrofa Kruppel-like factor 13 (KLF13) mRNA, complete cds. [GQ274321]                                                                                  |
| A_72_P224907 | PHLPP1    | 1,1700 | 0,0433 | down | PH domain and leucine rich repeat protein phosphatase 1 [Source:HGNC Symbol;Acc:20610] [ENSSSCT00000005402]                                               |
| A_72_P304604 |           | 1,1690 | 0,0438 | down | Rep: Membrane-associated ring finger (C3HC4) 7 - Mus musculus (Mouse), partial (23%) [TC525466]                                                           |
| A_72_P201857 |           | 1,1688 | 0,0336 | down |                                                                                                                                                           |
| A_72_P026581 | STK38     | 1,1686 | 0,0061 | down | serine/threonine kinase 38 [Source:HGNC Symbol;Acc:17847] [ENSSSCT00000001742]                                                                            |
| DCP_1_0      |           | 1,1685 | 0,0458 | down | Unknown                                                                                                                                                   |
| A_72_P016331 |           | 1,1682 | 0,0028 | down | Rep: DNA polymerase III, subunits gamma and tau - Ralstonia pickettii 12D, partial (4%) [TC571510]                                                        |
| A_72_P428649 | ARRDC4    | 1,1679 | 0,0386 | down | arrestin domain containing 4 [Source:HGNC Symbol;Acc:28087] [ENSSSCT00000002508]                                                                          |
| A_72_P146756 | RIT1      | 1,1669 | 0,0119 | down | Sus scrofa Ras-like without CAAX 1 (RIT1), mRNA [NM_001077230]                                                                                            |
| A_72_P495781 | GTF3C4    | 1,1668 | 0,0312 | down | general transcription factor IIIC, polypeptide 4, 90kDa [Source:HGNC Symbol;Acc:46671] [ENSSSCT00000006302]                                               |
| A_72_P734168 | APP       | 1,1668 | 0,0069 | down | Sus scrofa amyloid beta (A4) precursor protein (APP), mRNA [NM_214372]                                                                                    |
| DCP_1_1      |           | 1,1668 | 0,0350 | down | Unknown                                                                                                                                                   |
| A_72_P602293 | CDC5L     | 1,1644 | 0,0205 | down | cell division cycle 5-like [Source:HGNC Symbol;Acc:1743] [ENSSSCT00000001908]                                                                             |
| A_72_P258317 | NHLRC2    | 1,1642 | 0,0368 | down | Sus scrofa NHL repeat containing 2 (NHLRC2), mRNA [NM_001243561]                                                                                          |
| A_72_P530745 |           | 1,1639 | 0,0246 | down | Rep: Guanylyl cyclase-activating protein 2 (GCAP 2) (Guanylate cyclase activator 1B), - Canis familiaris, partial (52%) [TC547899]                        |
| A_72_P430569 |           | 1,1638 | 0,0096 | down | solute carrier family 8 (sodium/lithium/calcium exchanger), member B1 [Source:HGNC Symbol;Acc:26175] [ENSSSCT00000010829]                                 |
| A_72_P678715 | MESP1     | 1,1631 | 0,0429 | down | mesoderm posterior 1 homolog (mouse) [Source:HGNC Symbol;Acc:29658] [ENSSSCT00000002070]                                                                  |
| A_72_P060581 |           | 1,1631 | 0,0144 | down | Uncharacterized protein [Source:UniProtKB/TrEMBL;Acc:I3LD16] [ENSSSCT00000024699]                                                                         |
| A_72_P073556 | FAM134A   | 1,1629 | 0,0470 | down | family with sequence similarity 134, member A [Source:HGNC Symbol;Acc:28450] [ENSSSCT00000017648]                                                         |
| A_72_P070851 |           | 1,1626 | 0,0064 | down | Rep: Myb protein P42POP - Mus musculus (Mouse), partial (5%) [TC576306]                                                                                   |
| A_72_P245812 | VNN1      | 1,1617 | 0,0186 | down | Sus scrofa mRNA, clone:OVRM10042A10, expressed in ovary. [AK235021]                                                                                       |
| A_72_P318799 | C-FLIP    | 1,1605 | 0,0060 | down | Sus scrofa cellular FLICE-like inhibitory protein (C-FLIP), mRNA. [Source:RefSeq mRNA;Acc:NM_001001628] [ENSSSCT00000036156]                              |
| A_72_P242707 | PPM1F     | 1,1605 | 0,0353 | down | protein phosphatase, Mg2+/Mn2+ dependent, 1F [Source:HGNC Symbol;Acc:19388] [ENSSSCT00000011040]                                                          |
| A_72_P133976 | EPAS1     | 1,1603 | 0,0090 | down | Sus scrofa endothelial PAS domain protein 1 (EPAS1), mRNA [NM_001097420]                                                                                  |
| (+)E1A_r60_1 |           | 1,1592 | 0,0364 | down | Unknown                                                                                                                                                   |
| A_72_P008921 |           | 1,1592 | 0,0226 | down |                                                                                                                                                           |
| A_72_P027471 |           | 1,1592 | 0,0367 | down | Rep: procollagen-proline, 2-oxoglutarate 4-dioxygenase (proline 4-hydroxylase), alpha II polypeptide - Mus musculus, partial (12%) [TC552921]             |

|              |              |        |        |      |                                                                                                                                                         |
|--------------|--------------|--------|--------|------|---------------------------------------------------------------------------------------------------------------------------------------------------------|
| A_72_P307908 | PITPNB       | 1,1586 | 0,0126 | down | phosphatidylinositol transfer protein, beta [Source:HGNC Symbol;Acc:9002] [ENSSSCT00000010923]                                                          |
| A_72_P216607 |              | 1,1582 | 0,0416 | down | Rep: PaREP2b - Pyrobaculum aerophilum, partial (6%) [TC539323]                                                                                          |
| A_72_P538413 | ASB6         | 1,1582 | 0,0495 | down | Sus scrofa ankyrin repeat and SOCS box containing 6 (ASB6), mRNA [NM_001099937]                                                                         |
| A_72_P359053 | EPS15        | 1,1580 | 0,0259 | down | epidermal growth factor receptor pathway substrate 15 [Source:HGNC Symbol;Acc:3419] [ENSSSCT00000004284]                                                |
| A_72_P725743 | WDFY2        | 1,1560 | 0,0385 | down | Sus scrofa mRNA, clone:LVRM10032G05, expressed in liver. [AK232818]                                                                                     |
| A_72_P178166 | CDKN1B       | 1,1553 | 0,0300 | down | Sus scrofa cyclin-dependent kinase inhibitor 1B (p27, Kip1) (CDKN1B), mRNA [NM_214316]                                                                  |
| A_72_P251482 |              | 1,1545 | 0,0495 | down |                                                                                                                                                         |
| A_72_P181471 |              | 1,1538 | 0,0139 | down | Uncharacterized protein [Source:UniProtKB/TrEMBL;Acc:I3LR82] [ENSSSCT00000031293]                                                                       |
| A_72_P397039 | NUP133       | 1,1538 | 0,0206 | down | nucleoporin 133kDa [Source:HGNC Symbol;Acc:18016] [ENSSSCT00000011155]                                                                                  |
| A_72_P020791 | NPHP1        | 1,1531 | 0,0293 | down | nephronophthisis 1 (juvenile) [Source:HGNC Symbol;Acc:7905] [ENSSSCT00000035691]                                                                        |
| A_72_P129521 | RUNDC3A      | 1,1518 | 0,0117 | down | Sus scrofa mRNA, clone:ADR010091D08, expressed in adrenal gland. [AK343555]                                                                             |
| A_72_P488244 |              | 1,1511 | 0,0163 | down | Uncharacterized protein [Source:UniProtKB/TrEMBL;Acc:F1RKD3] [ENSSSCT00000010814]                                                                       |
| A_72_P015826 |              | 1,1508 | 0,0483 | down | Rep: eIF2 - Pichia stipitis (Yeast), partial (10%) [TC600391]                                                                                           |
| A_72_P315788 |              | 1,1501 | 0,0034 | down |                                                                                                                                                         |
| A_72_P442582 | LOC733646    | 1,1500 | 0,0405 | down | Sus scrofa lysosomal 9kDa H+ transporting ATPase V0 subunit e (LOC733646), mRNA [NM_001044579]                                                          |
| A_72_P503592 | FAM21C       | 1,1485 | 0,0442 | down | Uncharacterized protein [Source:UniProtKB/TrEMBL;Acc:F1SDV2] [ENSSSCT00000011385]                                                                       |
| A_72_P320883 |              | 1,1484 | 0,0387 | down | Rep: interferon regulatory factor 2 binding protein 2 isoform A - Homo sapiens, partial (36%) [TC610616]                                                |
| A_72_P185416 |              | 1,1482 | 0,0476 | down |                                                                                                                                                         |
| A_72_P214652 | DDX18        | 1,1455 | 0,0305 | down | Uncharacterized protein [Source:UniProtKB/TrEMBL;Acc:F1RY13] [ENSSSCT00000025125]                                                                       |
| A_72_P096591 |              | 1,1445 | 0,0215 | down | Uncharacterized protein [Source:UniProtKB/TrEMBL;Acc:F1SGW8] [ENSSSCT00000000878]                                                                       |
| A_72_P255157 | TMCC2        | 1,1439 | 0,0282 | down | transmembrane and coiled-coil domain family 2 [Source:HGNC Symbol;Acc:24239] [ENSSSCT00000016658]                                                       |
| A_72_P359363 |              | 1,1431 | 0,0291 | down |                                                                                                                                                         |
| A_72_P047026 |              | 1,1430 | 0,0074 | down | AJ957172 KN404_2 Sus scrofa cDNA clone C0007753m03 3', mRNA sequence [AJ957172]                                                                         |
| A_72_P100816 | C6H1orf174   | 1,1425 | 0,0219 | down | Sus scrofa chromosome 1 open reading frame 174 (C6H1orf174), mRNA [NM_001244820]                                                                        |
| A_72_P010796 |              | 1,1419 | 0,0154 | down | Sus scrofa mRNA, clone: TES010038G04, expressed in testis. [AK398200]                                                                                   |
| A_72_P430194 | LOC100521274 | 1,1395 | 0,0079 | down | Sus scrofa mRNA, clone:PTG010092E04, expressed in pituitary gland. [AK349514]                                                                           |
| A_72_P430694 | ALG5         | 1,1384 | 0,0236 | down | Sus scrofa mRNA, clone:THY010049D06, expressed in thymus. [AK238941]                                                                                    |
| A_72_P321508 | KLF7         | 1,1384 | 0,0222 | down | Kruppel-like factor 7 [Source:RefSeq peptide;Acc:NP_001090956] [ENSSSCT00000031970]                                                                     |
| A_72_P430219 |              | 1,1375 | 0,0071 | down | Rep: TonB family protein - Anaeromyxobacter sp. (strain Fw109-5), partial (9%) [TC553127]                                                               |
| A_72_P097881 | KAT6B        | 1,1338 | 0,0438 | down | K[lysine] acetyltransferase 6B [Source:HGNC Symbol;Acc:17582] [ENSSSCT00000011293]                                                                      |
| A_72_P442654 | STAT2        | 1,1336 | 0,0455 | down | Sus scrofa signal transducer and activator of transcription 2, 113kDa (STAT2), mRNA [NM_213889]                                                         |
| A_72_P086121 |              | 1,1329 | 0,0486 | down | cytochrome P450, family 20, subfamily A, polypeptide 1 [Source:HGNC Symbol;Acc:20576] [ENSSSCT00000024501]                                              |
| A_72_P442424 | LOC100739444 | 1,1316 | 0,0348 | down | Sus scrofa mRNA, clone:ITT010040A03, expressed in small intestine. [AK345026]                                                                           |
| A_72_P199947 |              | 1,1305 | 0,0485 | down | Rep: Phosphatidylinositol 4-kinase type 2-beta (EC 2.7.1.67) (Phosphatidylinositol 4-kinase type II-beta). - Canis familiaris, partial (39%) [TC599400] |
| A_72_P208917 |              | 1,1300 | 0,0209 | down | BX675220 Sus Scrofa library (scac) Sus scrofa cDNA clone scac0030.f.03 3prim. mRNA sequence [BX675220]                                                  |
| A_72_P203497 |              | 1,1288 | 0,0227 | down | Rep: Acyl-CoA dehydrogenase family member 10 (ACAD-10). - Bos Taurus, partial (33%) [TC620433]                                                          |
| A_72_P103467 |              | 1,1257 | 0,0150 | down | Rep: Undecaprenyl-diphosphatase 1 - Clostridium acetobutylicum, partial (6%) [TC542440]                                                                 |
| A_72_P398008 |              | 1,1246 | 0,0247 | down | Rep: Precorrin-2 methylase - Thermus thermophilus (strain HB8 / ATCC 27634 / DSM 579), partial (8%) [TC611063]                                          |
| A_72_P490731 | PTPRE        | 1,1231 | 0,0317 | down | protein tyrosine phosphatase, receptor type, E [Source:HGNC Symbol;Acc:9669] [ENSSSCT00000011767]                                                       |
| A_72_P052386 |              | 1,1223 | 0,0235 | down | Rep: FLORICAULA/LEAFY-like protein - Solanum lycopersicum (Tomato) (Lycopersicon esculentum), partial (5%) [TC613065]                                   |
| A_72_P232152 | EFTUD1       | 1,1222 | 0,0072 | down | Sus scrofa mRNA, clone:PBL010056D05, expressed in peripheral blood mononuclear cells. [AK348895]                                                        |
| A_72_P370408 | KLF13        | 1,1214 | 0,0440 | down | Sus scrofa Kruppel-like factor 13 (KLF13) mRNA, complete cds. [GQ274321]                                                                                |
| A_72_P493617 | PARP16       | 1,1204 | 0,0279 | down | poly (ADP-ribose) polymerase family, member 16 [Source:HGNC Symbol;Acc:26040] [ENSSSCT00000005439]                                                      |
| A_72_P341863 |              | 1,1194 | 0,0452 | down | Rep: GPI ethanolamine phosphate transferase 1 - Mus musculus (Mouse), partial (4%) [TC547800]                                                           |
| A_72_P234607 | USP46        | 1,1187 | 0,0436 | down | ubiquitin specific peptidase 46 [Source:HGNC Symbol;Acc:20075] [ENSSSCT00000030149]                                                                     |
| A_72_P531514 |              | 1,1154 | 0,0174 | down | WW domain binding protein 11 [Source:HGNC Symbol;Acc:16461] [ENSSSCT00000000657]                                                                        |
| A_72_P657354 | IGBP1        | 1,1139 | 0,0163 | down | PREDICTED: Sus scrofa immunoglobulin (CD79A) binding protein 1, transcript variant 2 (IGBP1), mRNA [XM_001927382]                                       |
| A_72_P339183 | LOC100626218 | 1,1134 | 0,0169 | down | Uncharacterized protein [Source:UniProtKB/TrEMBL;Acc:I3LPU1] [ENSSSCT000000027588]                                                                      |
| A_72_P206617 |              | 1,1130 | 0,0445 | down | BP158130 full-length enriched swine cDNA library, adult spleen Sus scrofa cDNA clone SPL010028E04 5', mRNA sequence [BP158130]                          |
| A_72_P073526 |              | 1,1120 | 0,0245 | down | 807308 MARC 3PIG Sus scrofa cDNA 5', mRNA sequence [CF178259]                                                                                           |
| A_72_P125901 |              | 1,1098 | 0,0230 | down | Rep: Uncharacterized protein C19orf28 - Homo sapiens (Human), partial (62%) [TC582869]                                                                  |
| A_72_P585246 | PCIF1        | 1,1074 | 0,0286 | down | PDX1 C-terminal inhibiting factor 1 [Source:HGNC Symbol;Acc:16200] [ENSSSCT000000008136]                                                                |
| A_72_P647594 | SRSF11       | 1,1063 | 0,0488 | down | Sus scrofa serine/arginine-rich splicing factor 11 (SRSF11), mRNA [NM_001044587]                                                                        |
| A_72_P556495 | ASTE1        | 1,1024 | 0,0487 | down | asteroid homolog 1 (Drosophila) [Source:HGNC Symbol;Acc:25021] [ENSSSCT00000035248]                                                                     |
