# Supplementary material for: Transcriptomic Analysis of Porcine Endometrium during Implantation after In Vitro Stimulation by Adiponectin
Source: MDPI journal article supplement (doi:10.3390/ijms20061335), 2019-03-16
Supplement: s1 [file s1]

Supplementary Table 2  
Gene ontology (GO) analysis generated from up-regulated and down-regulated DE-genes

| Category                |                                                     | Gene numbers | p-value  | Genes                                                                                                                                                                                                                                                                                                                                                                                                                                                                                                                                                                                                                                                                                                                                                                                                                                                                                                                                                                                                          |
|-------------------------|-----------------------------------------------------|--------------|----------|----------------------------------------------------------------------------------------------------------------------------------------------------------------------------------------------------------------------------------------------------------------------------------------------------------------------------------------------------------------------------------------------------------------------------------------------------------------------------------------------------------------------------------------------------------------------------------------------------------------------------------------------------------------------------------------------------------------------------------------------------------------------------------------------------------------------------------------------------------------------------------------------------------------------------------------------------------------------------------------------------------------|
| GO - Biological Process |                                                     |              |          |                                                                                                                                                                                                                                                                                                                                                                                                                                                                                                                                                                                                                                                                                                                                                                                                                                                                                                                                                                                                                |
| GO:0010467              | Gene expression                                     | 141          | 6.47E-04 | MORF4L1, STAT5A, LOC100158121, NAA15, SYNCRIP, RPS6KB1, FOXO3, ENPEP, NR2E3, NF1L1, SART1, CITED2, KDM1B, APP, MDPIC, WWP1, ZNF445, RARB, EIF2B2, SAMD4A, GNL3, PPP1CC, TBR1, HHEX, EP300, EIF2S1, MED17, TFAP2A, TNFAIP3, TDRD7, NFKBIA, KEAP1, MYBL2, CCL4, UHMK1, NR2C2, RPS27, HNRNPK, DD46, KLKB1, LEO1, HELLS, TRAF3, TAF2, ZNF398, IKZF4, DNMT3A, TAF5, SMAD7, KLF11, MPHOSPH10, LOC100154071, DENR, FXR2, RBMX, FOXF1, ATM, RNFB, ATFB, SFRP5, ETS1, PHEX, COPP5, CCNT1, ZNF518A, LOC100627422, DDR2, CDC45, NOS2, MSN, CASP1, KDM5B, FANCA, LOC100621389, CHUK, FTSJ3, LOC100153329, ABCE1, TBL1XR1, SNAPC5, CCNK, ACTA1, ARID5B, LDB1, SAA3, TLE4, EIF4G1, TARS, INHBA, FANCD2, HIPK3, UCHL5, CUX2, SBN01, MTDH, UBE3A, ZBTB11, SAV1, NR3C1, NEO1, VARS, DTNBP1, ZFP36L1, TFAM, SF3B1, TNFRSF1B, MAP3K2, AGO1, CHD2, MYCBP, KDM3A, PHF20L1, INPP5B, BCL9, CHD3, CEBPA, BRD2, KATZB, CEBPB, ZNF667, SIRT2, RGS14, SIRT2, SOD2, ATXN1, RPS6KA3, PAPOLA, HBZ, IRF1, NOP58, NOP56, ZBTB1, BMPR1A, RNF111 |
| *GO:0006351             | Transcription, DNA-templated                        | 91           | 4.38E-05 | MORF4L1, COPP5, STAT5A, LOC100158121, CCNT1, NAA15, FOXO3, NR2E3, ZNF518A, NF1L1, LOC100627422, DDR2, CITED2, CDC45, APP, MDPIC, WWP1, ZNF445, RARB, KDM5B, FANCA, LOC100153329, LOC100621389, CHUK, GNL3, SNAPC5, TBL1XR1, CCNK, LDB1, ARID5B, SAA3, TLE4, TBR1, INHBA, HHEX, EP300, FANCD2, HIPK3, MED17, UCHL5, TFAP2A, CUX2, TNFAIP3, MTDH, UBE3A, SAV1, NFKBIA, KEAP1, NR3C1, NEO1, MYBL2, NR2C2, TFAM, HNRNPK, MAP3K2, AGO1, LEO1, KDM3A, BCL9, CEBPA, TAF2, DNMT3A, IKZF4, KATZB, TAF5, SMAD7, KLF11, RBMX, SIRT2, FOXF1, RNFB, ATFB, CEBPB, SMAD7, TAF5, KLF11, ZNF667, LOC100154071, RBMX, FOXF1, RGS14, SIRT2, SOD2, SFRP5, ATFB, RNFB, ATXN1, RPS6KA3, ETS1, HBZ, IRF1, ZBTB1, RNF111, BMPR1A                                                                                                                                                                                                                                                                                                       |
| *GO:0006366             | Transcription from RNA polymerase II promoter       | 51           | 3.77E-03 | COPP5, STAT5A, CCNT1, NR2E3, NF1L1, LOC100627422, CITED2, APP, RARB, CHUK, GNL3, SNAPC5, TBL1XR1, CCNK, LDB1, TLE4, TBR1, INHBA, HHEX, EP300, MED17, TFAP2A, MTDH, UBE3A, NFKBIA, NEO1, NR3C1, NR2C2, AGO1, LEO1, KDM3A, BCL9, CEBPA, TAF2, DNMT3A, IKZF4, KATZB, TAF5, SMAD7, KLF11, RBMX, SIRT2, FOXF1, RNFB, ATFB, RPS6KA3, ETS1, HBZ, IRF1, ZBTB1, BMPR1A                                                                                                                                                                                                                                                                                                                                                                                                                                                                                                                                                                                                                                                  |
| GO:0034645              | Cellular macromolecule biosynthetic process         | 131          | 5.09E-04 | MORF4L1, STAT5A, LOC100158121, NAA15, SYNCRIP, RPS6KB1, FOXO3, NR2E3, NF1L1, CITED2, ST3GAL1, APP, APOA1, MDPIC, ST3GAL4, WWP1, ZNF445, RARB, EIF2B2, SAMD4A, GNL3, POLS1, TBR1, HHEX, EP300, EIF2S1, MED17, MCMBP, TFAP2A, TNFAIP3, ENP1, NFKBIA, KEAP1, MYBL2, NR2C2, UHMK1, RPS27, HNRNPK, LEO1, HELLS, TRAF3, TAF2, ZNF398, IKZF4, DNMT3A, SMAD7, TAF5, KLF11, LOC100154071, DENR, FXR2, RBMX, FOXF1, ATM, SFRP5, ATFB, RNFB, ETS1, PHEX, GRB7, ALG12, ABCF1, CPFB2, COPP5, CPFB4, CCNT1, DPY19L4, ZNF518A, LOC100627422, DDR2, CDC45, KDM5B, TNIP1, FANCA, LOC100621389, CHUK, LOC100153329, ABCE1, TBL1XR1, SNAPC5, CCNK, ARID5B, LDB1, PIK3V, SAA3, CHS13, TLE4, EIF4G1, TARS, INHBA, FANCD2, HIPK3, UCHL5, CHSY1, CUX2, SBN01, MTDH, UBE3A, ZBTB11, SAV1, NR3C1, NEO1, VARS, ZFP36L1, TFAM, MAP3K2, AGO1, CHD2, MYCBP, KDM3A, PHF20L1, BCL9, CHD3, CEBPA, BRD2, KATZB, CEBPB, ZNF667, RGS14, SIRT2, SOD2, ATXN1, RPS6KA3, HBZ, CSGALNACT2, IRF1, ZBTB1, RNF111, BMPR1A                                 |
| *GO:0018130             | Heterocycle biosynthetic process                    | 107          | 1.66E-03 | MORF4L1, STAT5A, LOC100158121, NAA15, FOXO3, NR2E3, NF1L1, CITED2, TPX1, APP, MDPIC, WWP1, RARB, ZNF445, ATFB, SAMD4A, GNL3, TBR1, HHEX, EP300, MED17, TFAP2A, TNFAIP3, PRPS2, NFKBIA, KEAP1, MRAP2, MYBL2, CCL4, NR2C2, HNRNPK, LEO1, HELLS, TRAF3, ZNF398, TAF2, IKZF4, DNMT3A, SMAD7, TAF5, KLF11, LOC100154071, RBMX, FOXF1, RNFB, ATFB, SFRP5, ETS1, PHEX, COPP5, CCNT1, ZNF518A, DDR2, LOC100627422, CDC45, ATP5Q, FANCA, KDM5B, LOC100153329, CHUK, LOC100621389, TBL1XR1, SNAPC5, CCNK, LDB1, ARID5B, SAA3, TLE4, INHBA, FANCD2, HIPK3, UCHL5, CUX2, SBN01, MTDH, UBE3A, SAV1, ZBTB11, NR3C1, NEO1, TFAM, MAP3K2, AGO1, CHD2, MYCBP, KDM3A, PHF20L1, CHD3, BCL9, CEBPA, BRD2, KATZB, CEBPB, ZNF667, AMPD3, SIRT2, RGS14, SOD2, ATXN1, RPS6KA3, HBZ, IRF1, ZBTB1, RNF111, BMPR1A                                                                                                                                                                                                                        |
| *GO:0034654             | Nucleobase-containing compound biosynthetic process | 106          | 1.30E-03 | MORF4L1, STAT5A, LOC100158121, NAA15, FOXO3, NR2E3, NF1L1, CITED2, APP, MDPIC, WWP1, RARB, ZNF445, ATFB, SAMD4A, GNL3, TBR1, HHEX, EP300, MED17, TFAP2A, TNFAIP3, PRPS2, NFKBIA, KEAP1, MRAP2, MYBL2, CCL4, NR2C2, HNRNPK, LEO1, HELLS, TRAF3, ZNF398, TAF2, IKZF4, DNMT3A, SMAD7, TAF5, KLF11, LOC100154071, RBMX, FOXF1, RNFB, ATFB, SFRP5, ETS1, PHEX, COPP5, CCNT1, ZNF518A, DDR2, LOC100627422, CDC45, ATP5Q, FANCA, KDM5B, LOC100153329, CHUK, LOC100621389, TBL1XR1, SNAPC5, CCNK, LDB1, ARID5B, SAA3, TLE4, INHBA, FANCD2, HIPK3, UCHL5, CUX2, SBN01, MTDH, UBE3A, SAV1, ZBTB11, NR3C1, NEO1, TFAM, MAP3K2, CHD2, AGO1, MYCBP, KDM3A, PHF20L1, CHD3, BCL9, CEBPA, BRD2, KATZB, CEBPB, ZNF667, AMPD3, SIRT2, RGS14, SOD2, ATXN1, RPS6KA3, HBZ, IRF1, ZBTB1, RNF111, BMPR1A                                                                                                                                                                                                                              |
| **GO:0019438            | Aromatic compound biosynthetic process              | 107          | 1.82E-03 | MORF4L1, STAT5A, LOC100158121, NAA15, FOXO3, NR2E3, NF1L1, CITED2, TPX1, APP, MDPIC, WWP1, RARB, ZNF445, ATFB, SAMD4A, GNL3, TBR1, HHEX, EP300, MED17, TFAP2A, TNFAIP3, PRPS2, NFKBIA, KEAP1, MRAP2, MYBL2, CCL4, NR2C2, HNRNPK, LEO1, HELLS, TRAF3, ZNF398, TAF2, IKZF4, DNMT3A, SMAD7, TAF5, KLF11, LOC100154071, RBMX, FOXF1, RNFB, ATFB, SFRP5, ETS1, PHEX, COPP5, CCNT1, ZNF518A, DDR2, LOC100627422, CDC45, ATP5Q, FANCA, KDM5B, LOC100153329, CHUK, LOC100621389, TBL1XR1, SNAPC5, CCNK, LDB1, ARID5B, SAA3, TLE4, INHBA, FANCD2, HIPK3, UCHL5, CUX2, SBN01, MTDH, UBE3A, SAV1, ZBTB11, NR3C1, NEO1, TFAM, MAP3K2, AGO1, CHD2, MYCBP, KDM3A, PHF20L1, CHD3, BCL9, CEBPA, BRD2, KATZB, CEBPB, ZNF667, AMPD3, SIRT2, RGS14, SOD2, ATXN1, RPS6KA3, HBZ, IRF1, ZBTB1, RNF111, BMPR1A                                                                                                                                                                                                                        |
| GO:0010468              | Regulation of gene expression                       | 118          | 7.30E-06 | MORF4L1, STAT5A, LOC100158121, NAA15, SYNCRIP, RPS6KB1, FOXO3, NR2E3, CITED2, KDM1B, APP, MDPIC, WWP1, RARB, EIF2B2, SAMD4A, GNL3, PPP1CC, TBR1, HHEX, EP300, EIF2S1, MED17, TFAP2A, TNFAIP3, TDRD7, NFKBIA, KEAP1, MYBL2, CCL4, NR2C2, UHMK1, DD46, HNRNPK, LEO1, HELLS, TRAF3, TAF2, ZNF398, IKZF4, DNMT3A, SMAD7, KLF11, LOC100154071, FXR2, RBMX, FOXF1, ATM, RNFB, ATFB, SFRP5, ETS1, PHEX, GRB7, ABCF1, CPFB2, COPP5, CPFB4, CCNT1, LOC100627422, DDR2, CDC45, NOS2, MSN, KDM5B, FANCA, CHUK, LOC100153329, TBL1XR1, CCNK, ACTA1, ARID5B, LDB1, SAA3, TLE4, EIF4G1, INHBA, FANCD2, UCHL5, CUX2, SBN01, MTDH, UBE3A, ZBTB11, SAV1, NR3C1, NEO1, DTNBP1, ZFP36L1, TFAM, TNFRSF1B, MAP3K2, AGO1, CHD2, MYCBP, KDM3A, PHF20L1, INPP5B, BCL9, CHD3, CEBPA, BRD2, KATZB, CEBPB, ZNF667, SIRT2, RGS14, SOD2, ATXN1, RPS6KA3, PAPOLA, HBZ, IRF1, ZBTB1, RNF111, BMPR1A                                                                                                                                           |
| *GO:0010628             | Positive regulation of gene expression              | 53           | 7.62E-04 | ABCF1, COPP5, STAT5A, CCNT1, NAA15, RPS6KB1, NR2E3, APP, MDPIC, RARB, MSN, KDM5B, SAMD4A, CHUK, GNL3, TBL1XR1, CCNK, ACTA1, LDB1, TBR1, HHEX, INHBA, EP300, MED17, TFAP2A, CUX2, UBE3A, NFKBIA, NR3C1, DTNBP1, NR2C2, UHMK1, TFAM, MAP3K2, AGO1, LEO1, KDM3A, BCL9, CEBPA, TAF2, IKZF4, KATZB, CEBPB, RBMX, SIRT2, FOXF1, ATFB, RPS6KA3, ETS1, IRF1, RNF111, BMPR1A                                                                                                                                                                                                                                                                                                                                                                                                                                                                                                                                                                                                                                            |
| *GO:0010629             | Negative regulation of gene expression              | 43           | 7.43E-03 | MORF4L1, MTDH, CPFB2, CPFB4, CCNT1, LOC100158121, SYNCRIP, NR2E3, LOC100627422, CCL4, ZFP36L1, CDC45, MDPIC, WWP1, AGO1, RARB, NOS2, KDM5B, LOC100153329, SAMD4A, HELLS, CEBPA, TBL1XR1, DNMT3A, IKZF4, SMAD7, LDB1, KLF11, LOC100154071, SAA3, TLE4, FXR2, FOXF1, SIRT2, ATXN1, RNFB, EP300, EIF2S1, HBZ, IRF1, TFAP2A, GRB7, ZBTB1                                                                                                                                                                                                                                                                                                                                                                                                                                                                                                                                                                                                                                                                           |
| *GO:0016458             | Gene silencing                                      | 8            | 5.08E-02 | MORF4L1, DNMT3A, CDC45, LOC100158121, AGO1, LOC100154071, HELLS, LOC100153329                                                                                                                                                                                                                                                                                                                                                                                                                                                                                                                                                                                                                                                                                                                                                                                                                                                                                                                                  |
| *GO:0006342             | Chromatin silencing                                 | 7            | 1.10E-02 | MORF4L1, DNMT3A, CDC45, LOC100158121, LOC100154071, HELLS, LOC100153329                                                                                                                                                                                                                                                                                                                                                                                                                                                                                                                                                                                                                                                                                                                                                                                                                                                                                                                                        |
| *GO:0045814             | Negative regulation of gene expression              | 7            | 1.45E-02 | MORF4L1, DNMT3A, CDC45, LOC100158121, LOC100154071, HELLS, LOC100153329                                                                                                                                                                                                                                                                                                                                                                                                                                                                                                                                                                                                                                                                                                                                                                                                                                                                                                                                        |
| *GO:0010608             | Posttranscriptional regulation of gene expression   | 18           | 2.23E-03 | ABCF1, CPFB2, TDRD7, CPFB4, SYNCRIP, RPS6KB1, FOXO3, FXR2, UHMK1, EIF4G1, ZFP36L1, TNFRSF1B, APP, EIF2S1, AGO1, EIF2B2, GRB7, SAMD4A                                                                                                                                                                                                                                                                                                                                                                                                                                                                                                                                                                                                                                                                                                                                                                                                                                                                           |
| *GO:0006417             | Regulation of translation                           | 16           | 2.27E-03 | ABCF1, CPFB2, CPFB4, SYNCRIP, RPS6KB1, FOXO3, FXR2, UHMK1, EIF4G1, ZFP36L1, APP, EIF2S1, AGO1, EIF2B2, GRB7, SAMD4A                                                                                                                                                                                                                                                                                                                                                                                                                                                                                                                                                                                                                                                                                                                                                                                                                                                                                            |
| **GO:0017148            | Negative regulation of translation                  | 9            | 8.77E-03 | ZFP36L1, CPFB2, EIF2S1, CPFB4, AGO1, SYNCRIP, FXR2, GRB7, SAMD4A                                                                                                                                                                                                                                                                                                                                                                                                                                                                                                                                                                                                                                                                                                                                                                                                                                                                                                                                               |
| *GO:0040029             | Regulation of gene expression, epigenetic           | 9            | 5.98E-02 | MORF4L1, KDM1B, DNMT3A, CDC45, LOC100158121, AGO1, LOC100154071, HELLS, LOC100153329                                                                                                                                                                                                                                                                                                                                                                                                                                                                                                                                                                                                                                                                                                                                                                                                                                                                                                                           |

|              |                                                                           |     |          |                                                                                                                                                                                                                                                                                                                                                                                                                                                                                                                                                                                                                                                                                                                                                                                                                                                                                                                                                |
|--------------|---------------------------------------------------------------------------|-----|----------|------------------------------------------------------------------------------------------------------------------------------------------------------------------------------------------------------------------------------------------------------------------------------------------------------------------------------------------------------------------------------------------------------------------------------------------------------------------------------------------------------------------------------------------------------------------------------------------------------------------------------------------------------------------------------------------------------------------------------------------------------------------------------------------------------------------------------------------------------------------------------------------------------------------------------------------------|
| GO:0051171   | Regulation of nitrogen compound metabolic process                         | 117 | 1,77E-05 | MORF4L1, STAT5A, LOC100158121, NAA15, SYNCRIP, RPS6KB1, FOXO3, NR2E3, CITED2, KDM1B, APP, MDFIC, WWP1, RARB, EIF2B2, SAMD4A, GNL3, FBP1, TBR1, HHEX, EP300, EIF2F5, MED17, TFAP2A, TNFAIP3, MEI1, ASS1, NFKBIA, KEAP1, MRAP2, MYBL2, CCL4, NR2C2, UHMK1, HNRNPK, LPCAT1, LEO1, HELLS, TRAF3, TAF2, ZNF398, IKZF4, DNMT3A, SMAD7, KLF11, LOC100154071, FOXJ2, RBMX, FOXP1, RNFB, ATF6, SFRP5, ETS1, PARPBP, PHEX, GRB7, ABCF1, CPEB2, COP55, CPEB4, CCNT1, DDR2, LOC100627422, CDC45, KDM5B, FANCA, CHUK, LOC100153329, TBL1XR1, CCNK, ARID5B, LDB1, SAA3, TLE4, RAD52, EPF4G1, INHBA, FANCD2, UCHL5, SBN01, MTDH, UBE3A, SAV1, ZBTB11, NR3C1, NEO1, ZFP36L1, TFAM, MAP3K2, AGO1, CHD2, MYCBP, KDM3A, PHF20L1, ACSL3, TRIP12, BCL9, CHD3, CEBPA, BRD2, KATZB, CEBPB, ZNF667, SIRT2, RGS14, SOD2, ATXN1, SAMD5, RPS6KA3, PAPOLA, HBZ, IRF1, ZBTB1, RNF111, BMPR1A                                                                                |
| *GO:0019219  | Regulation of nucleobase-containing compound metabolic process            | 101 | 1,50E-03 | MORF4L1, STAT5A, LOC100158121, NAA15, NR2E3, CITED2, KDM1B, APP, MDFIC, WWP1, RARB, SAMD4A, GNL3, FBP1, TBR1, HHEX, EP300, MED17, TFAP2A, TNFAIP3, MEI1, NFKBIA, KEAP1, MRAP2, MYBL2, CCL4, NR2C2, UHMK1, HNRNPK, LEO1, HELLS, TRAF3, ZNF398, TAF2, IKZF4, DNMT3A, SMAD7, KLF11, LOC100154071, RBMX, FOXP1, RNFB, ATF6, SFRP5, ETS1, PARPBP, PHEX, COP55, CCNT1, DDR2, LOC100627422, CDC45, FANCA, KDM5B, LOC100153329, CHUK, TBL1XR1, CCNK, LDB1, ARID5B, SAA3, TLE4, TBR1, INHBA, HHEX, EP300, FANCD2, MED17, UCHL5, TFAP2A, TNFAIP3, SBN01, MTDH, UBE3A, ZBTB11, SAV1, NFKBIA, KEAP1, NR3C1, NEO1, MYBL2, CCL4, NR2C2, UHMK1, TFAM, HNRNPK, MAP3K2, AGO1, CHD2, LEO1, MYCBP, KDM3A, PHF20L1, HELLS, BCL9, CHD3, TRAF3, CEBPA, ZNF398, TAF2, IKZF4, DNMT3A, BRD2, KATZB, CEBPB, SMAD7, KLF11, LOC100154071, ZNF667, RBMX, FOXP1, RGS14, SIRT2, SOD2, SFRP5, ATF6, RNFB, ATXN1, RPS6KA3, PAPOLA, ETS1, HBZ, IRF1, PHEX, ZBTB1, RNF111, BMPR1A |
| *GO:0051252  | Regulation of RNA metabolic process                                       | 94  | 6,65E-04 | MORF4L1, COP55, STAT5A, LOC100158121, CCNT1, NAA15, NR2E3, LOC100627422, DDR2, CITED2, CDC45, APP, MDFIC, WWP1, RARB, KDM5B, FANCA, LOC100153329, CHUK, SAMD4A, GNL3, TBL1XR1, CCNK, LDB1, ARID5B, SAA3, TLE4, TBR1, INHBA, HHEX, EP300, FANCD2, MED17, UCHL5, TFAP2A, TNFAIP3, SBN01, MTDH, UBE3A, ZBTB11, SAV1, NFKBIA, KEAP1, NR3C1, NEO1, MYBL2, CCL4, NR2C2, UHMK1, TFAM, HNRNPK, MAP3K2, AGO1, CHD2, LEO1, MYCBP, KDM3A, PHF20L1, HELLS, BCL9, CHD3, TRAF3, CEBPA, ZNF398, TAF2, IKZF4, DNMT3A, BRD2, KATZB, CEBPB, SMAD7, KLF11, LOC100154071, ZNF667, RBMX, FOXP1, RGS14, SIRT2, SOD2, SFRP5, ATF6, RNFB, ATXN1, RPS6KA3, PAPOLA, ETS1, HBZ, IRF1, PHEX, ZBTB1, RNF111, BMPR1A                                                                                                                                                                                                                                                         |
| *GO:2001141  | Regulation of RNA biosynthetic process                                    | 92  | 3,29E-04 | MORF4L1, COP55, STAT5A, LOC100158121, CCNT1, NAA15, NR2E3, LOC100627422, DDR2, CITED2, CDC45, APP, MDFIC, WWP1, RARB, KDM5B, FANCA, LOC100153329, CHUK, SAMD4A, GNL3, TBL1XR1, CCNK, LDB1, ARID5B, SAA3, TLE4, TBR1, INHBA, HHEX, EP300, FANCD2, MED17, UCHL5, TFAP2A, TNFAIP3, SBN01, MTDH, UBE3A, ZBTB11, SAV1, NFKBIA, KEAP1, NR3C1, NEO1, MYBL2, CCL4, NR2C2, UHMK1, TFAM, HNRNPK, MAP3K2, AGO1, CHD2, LEO1, MYCBP, KDM3A, PHF20L1, HELLS, BCL9, CHD3, TRAF3, CEBPA, ZNF398, TAF2, IKZF4, DNMT3A, BRD2, KATZB, CEBPB, SMAD7, KLF11, ZNF667, LOC100154071, RBMX, FOXP1, RGS14, SIRT2, SOD2, SFRP5, ATF6, RNFB, ATXN1, RPS6KA3, ETS1, HBZ, IRF1, PHEX, ZBTB1, RNF111, BMPR1A                                                                                                                                                                                                                                                                 |
| *GO:1903506  |                                                                           | 91  | 4,60E-04 | MORF4L1, COP55, STAT5A, LOC100158121, CCNT1, NAA15, NR2E3, LOC100627422, DDR2, CITED2, CDC45, APP, MDFIC, WWP1, RARB, KDM5B, FANCA, LOC100153329, CHUK, SAMD4A, GNL3, TBL1XR1, CCNK, LDB1, ARID5B, SAA3, TLE4, TBR1, INHBA, HHEX, EP300, FANCD2, MED17, UCHL5, TFAP2A, TNFAIP3, SBN01, MTDH, UBE3A, ZBTB11, SAV1, NFKBIA, KEAP1, NR3C1, NEO1, MYBL2, NR2C2, TFAM, HNRNPK, MAP3K2, AGO1, CHD2, LEO1, MYCBP, KDM3A, PHF20L1, HELLS, BCL9, CHD3, TRAF3, CEBPA, ZNF398, TAF2, IKZF4, DNMT3A, BRD2, KATZB, CEBPB, SMAD7, KLF11, ZNF667, LOC100154071, RBMX, FOXP1, RGS14, SIRT2, SOD2, SFRP5, ATF6, RNFB, ATXN1, RPS6KA3, ETS1, HBZ, IRF1, PHEX, ZBTB1, RNF111, BMPR1A                                                                                                                                                                                                                                                                              |
| *GO:0006355  | Regulation of transcription, DNA-templated                                | 91  | 4,36E-04 | MORF4L1, COP55, STAT5A, LOC100158121, CCNT1, NAA15, NR2E3, LOC100627422, DDR2, CITED2, CDC45, APP, MDFIC, WWP1, RARB, KDM5B, FANCA, LOC100153329, CHUK, SAMD4A, GNL3, TBL1XR1, CCNK, LDB1, ARID5B, SAA3, TLE4, TBR1, INHBA, HHEX, EP300, FANCD2, MED17, UCHL5, TFAP2A, TNFAIP3, SBN01, MTDH, UBE3A, ZBTB11, SAV1, NFKBIA, KEAP1, NR3C1, NEO1, MYBL2, NR2C2, TFAM, HNRNPK, MAP3K2, AGO1, CHD2, LEO1, MYCBP, KDM3A, PHF20L1, HELLS, BCL9, CHD3, TRAF3, CEBPA, ZNF398, TAF2, IKZF4, DNMT3A, BRD2, KATZB, CEBPB, SMAD7, KLF11, ZNF667, LOC100154071, RBMX, FOXP1, RGS14, SIRT2, SOD2, SFRP5, ATF6, RNFB, ATXN1, RPS6KA3, ETS1, HBZ, IRF1, PHEX, ZBTB1, RNF111, BMPR1A                                                                                                                                                                                                                                                                              |
| *GO:0006357  | Regulation of transcription from RNA polymerase II promoter               | 54  | 4,19E-03 | COP55, STAT5A, CCNT1, NR2E3, LOC100627422, CITED2, APP, RARB, CHUK, GNL3, TBL1XR1, CCNK, LDB1, ARID5B, TLE4, TBR1, INHBA, HHEX, EP300, MED17, TFAP2A, MTDH, UBE3A, NFKBIA, ATXN1, NR3C1, MYBL2, NR2C2, HNRNPK, AGO1, LEO1, KDM3A, BCL9, CEBPA, TAF2, DNMT3A, IKZF4, BRD2, KATZB, SMAD7, KLF11, ZNF667, LOC100154071, RBMX, FOXP1, RGS14, SIRT2, SOD2, RNFB, ATF6, RPS6KA3, ETS1, HBZ, IRF1, ZBTB1, BMPR1A                                                                                                                                                                                                                                                                                                                                                                                                                                                                                                                                      |
| *GO:0051090  | Regulation of sequence-specific DNA binding transcription factor activity | 15  | 2,97E-02 | SFRP5, MTDH, CEBPB, EP300, FANCD2, SMAD7, SAV1, ARID5B, NFKBIA, KEAP1, TNFAIP3, FANCA, DDR2, TRAF3                                                                                                                                                                                                                                                                                                                                                                                                                                                                                                                                                                                                                                                                                                                                                                                                                                             |
| **GO:0051173 | Positive regulation of nitrogen compound metabolic process                | 53  | 3,05E-03 | ABCF1, COP55, STAT5A, CCNT1, NAA15, RPS6KB1, NR2E3, APP, MDFIC, RARB, SAMD4A, CHUK, GNL3, TBL1XR1, CCNK, LDB1, TBR1, HHEX, INHBA, EP300, MED17, TFAP2A, ASS1, UBE3A, NFKBIA, MRAP2, NR3C1, NR2C2, UHMK1, TFAM, MAP3K2, AGO1, LEO1, KDM3A, ACSL3, BCL9, CEBPA, TAF2, IKZF4, KATZB, CEBPB, RBMX, SIRT2, FOXP1, SOD2, RNFB, ATF6, RPS6KA3, ETS1, IRF1, RNF111, BMPR1A                                                                                                                                                                                                                                                                                                                                                                                                                                                                                                                                                                             |
| *GO:0045935  | Positive regulation of nucleobase-containing compound metabolic process   | 46  | 2,25E-02 | COP55, UBE3A, STAT5A, CCNT1, NAA15, NFKBIA, MRAP2, NR2E3, NR3C1, NR2C2, TFAM, APP, MDFIC, MAP3K2, AGO1, LEO1, KDM3A, RARB, CHUK, GNL3, BCL9, CEBPA, TAF2, TBL1XR1, IKZF4, CCNK, KATZB, CEBPB, LDB1, TBR1, RBMX, FOXP1, SIRT2, RNFB, ATF6, HHEX, INHBA, RPS6KA3, EP300, ETS1, MED17, IRF1, TFAP2A, BMPR1A, RNF111                                                                                                                                                                                                                                                                                                                                                                                                                                                                                                                                                                                                                               |
| *GO:0051254  | Positive regulation of RNA metabolic process                              | 44  | 2,98E-03 | COP55, UBE3A, STAT5A, CCNT1, NAA15, NFKBIA, NR2E3, NR3C1, NR2C2, TFAM, APP, MDFIC, MAP3K2, AGO1, LEO1, KDM3A, RARB, CHUK, GNL3, BCL9, CEBPA, TAF2, TBL1XR1, IKZF4, CCNK, KATZB, CEBPB, LDB1, TBR1, RBMX, FOXP1, SIRT2, ATF6, HHEX, INHBA, RPS6KA3, EP300, ETS1, MED17, IRF1, TFAP2A, BMPR1A, RNF111                                                                                                                                                                                                                                                                                                                                                                                                                                                                                                                                                                                                                                            |
| *GO:1902690  | Positive regulation of RNA biosynthetic process                           | 44  | 1,41E-03 | COP55, UBE3A, STAT5A, CCNT1, NAA15, NFKBIA, NR2E3, NR3C1, NR2C2, TFAM, APP, MDFIC, MAP3K2, AGO1, LEO1, KDM3A, RARB, CHUK, GNL3, BCL9, CEBPA, TAF2, TBL1XR1, IKZF4, CCNK, KATZB, CEBPB, LDB1, TBR1, RBMX, FOXP1, SIRT2, ATF6, HHEX, INHBA, RPS6KA3, EP300, ETS1, MED17, IRF1, TFAP2A, BMPR1A, RNF111                                                                                                                                                                                                                                                                                                                                                                                                                                                                                                                                                                                                                                            |
| *GO:1903508  | Positive regulation of nucleic acid-templated transcription               | 43  | 2,18E-03 | COP55, UBE3A, STAT5A, CCNT1, NAA15, NFKBIA, NR2E3, NR3C1, NR2C2, TFAM, APP, MAP3K2, AGO1, LEO1, KDM3A, RARB, CHUK, GNL3, BCL9, CEBPA, TAF2, IKZF4, TBL1XR1, CCNK, KATZB, CEBPB, LDB1, TBR1, RBMX, FOXP1, SIRT2, ATF6, HHEX, INHBA, RPS6KA3, EP300, ETS1, MED17, IRF1, TFAP2A, BMPR1A, RNF111                                                                                                                                                                                                                                                                                                                                                                                                                                                                                                                                                                                                                                                   |
| *GO:0045893  | Positive regulation of transcription, DNA-templated                       | 43  | 2,18E-03 | COP55, UBE3A, STAT5A, CCNT1, NAA15, NFKBIA, NR2E3, NR3C1, NR2C2, TFAM, APP, MAP3K2, AGO1, LEO1, KDM3A, RARB, CHUK, GNL3, BCL9, CEBPA, TAF2, TBL1XR1, CCNK, KATZB, CEBPB, LDB1, TBR1, RBMX, FOXP1, SIRT2, ATF6, HHEX, INHBA, RPS6KA3, EP300, ETS1, MED17, IRF1, TFAP2A, BMPR1A, RNF111                                                                                                                                                                                                                                                                                                                                                                                                                                                                                                                                                                                                                                                          |
| *GO:0045944  | Positive regulation of transcription from RNA polymerase II promoter      | 36  | 4,39E-04 | COP55, UBE3A, STAT5A, CCNT1, NFKBIA, NR2E3, NR3C1, NR2C2, APP, AGO1, LEO1, KDM3A, RARB, CHUK, GNL3, BCL9, TAF2, IKZF4, TBL1XR1, CCNK, KATZB, LDB1, TBR1, RBMX, FOXP1, SIRT2, ATF6, HHEX, INHBA, RPS6KA3, EP300, ETS1, MED17, IRF1, TFAP2A, BMPR1A                                                                                                                                                                                                                                                                                                                                                                                                                                                                                                                                                                                                                                                                                              |
| **GO:0051172 | Negative regulation of nitrogen compound metabolic process                | 46  | 1,85E-03 | MORF4L1, MTDH, CPEB2, CPEB4, CCNT1, NR2E3, CCL4, LOC100627422, SYNCRIP, NR2E3, LOC100627422, CCL4, ZFP36L1, CDC45, LPCAT1, MDFIC, WWP1, AGO1, RARB, KDM5B, LOC100153329, TRIP12, SAMD4A, HELLS, CEBPA, TBL1XR1, DNMT3A, IKZF4, SMAD7, LDB1, KLF11, FBP1, LOC100154071, SAA3, TLE4, FOXJ2, FOXO1, SIRT2, ATXN1, RNFB, EP300, EIF2B1, PARPBP, HBZ, IRF1, TFAP2A, GRB7, ZBTB1                                                                                                                                                                                                                                                                                                                                                                                                                                                                                                                                                                     |
| *GO:0045934  | Negative regulation of nucleobase-containing compound metabolic process   | 36  | 4,22E-02 | MORF4L1, MTDH, LOC100158121, CCNT1, NR2E3, CCL4, LOC100627422, CDC45, MDFIC, WWP1, RARB, KDM5B, LOC100153329, TRIP12, HELLS, CEBPA, IKZF4, DNMT3A, TBL1XR1, SMAD7, LDB1, KLF11, FBP1, LOC100154071, SAA3, TLE4, FOXO1, SIRT2, ATXN1, RNFB, EP300, PARPBP, HBZ, IRF1, TFAP2A, ZBTB1                                                                                                                                                                                                                                                                                                                                                                                                                                                                                                                                                                                                                                                             |
| *GO:0051253  | Negative regulation of RNA metabolic process                              | 33  | 4,13E-02 | MORF4L1, MTDH, LOC100158121, CCNT1, NR2E3, CCL4, LOC100627422, CDC45, MDFIC, WWP1, RARB, KDM5B, LOC100153329, HELLS, CEBPA, IKZF4, DNMT3A, TBL1XR1, SMAD7, LDB1, KLF11, LOC100154071, SAA3, TLE4, FOXO1, SIRT2, ATXN1, RNFB, EP300, HBZ, IRF1, TFAP2A, ZBTB1                                                                                                                                                                                                                                                                                                                                                                                                                                                                                                                                                                                                                                                                                   |
| *GO:1902679  | Negative regulation of RNA biosynthetic process                           | 32  | 3,99E-02 | MORF4L1, MTDH, LOC100158121, NR2E3, CCL4, LOC100627422, CDC45, MDFIC, WWP1, RARB, KDM5B, LOC100153329, HELLS, CEBPA, IKZF4, DNMT3A, TBL1XR1, SMAD7, LDB1, KLF11, LOC100154071, SAA3, TLE4, FOXO1, SIRT2, ATXN1, RNFB, EP300, HBZ, IRF1, TFAP2A, ZBTB1                                                                                                                                                                                                                                                                                                                                                                                                                                                                                                                                                                                                                                                                                          |
| *GO:1903507  | Negative regulation of nucleic acid-templated transcription               | 31  | 5,16E-02 | MORF4L1, MTDH, LOC100158121, NR2E3, LOC100627422, CDC45, MDFIC, WWP1, RARB, KDM5B, LOC100153329, HELLS, CEBPA, IKZF4, DNMT3A, TBL1XR1, SMAD7, LDB1, KLF11, LOC100154071, SAA3, TLE4, FOXO1, SIRT2, ATXN1, RNFB, EP300, HBZ, IRF1, TFAP2A, ZBTB1                                                                                                                                                                                                                                                                                                                                                                                                                                                                                                                                                                                                                                                                                                |
| *GO:0045892  | Negative regulation of transcription, DNA-templated                       | 31  | 4,89E-02 | MORF4L1, MTDH, LOC100158121, NR2E3, LOC100627422, CDC45, MDFIC, WWP1, RARB, KDM5B, LOC100153329, HELLS, CEBPA, IKZF4, DNMT3A, TBL1XR1, SMAD7, LDB1, KLF11, LOC100154071, SAA3, TLE4, FOXO1, SIRT2, ATXN1, RNFB, EP300, HBZ, IRF1, TFAP2A, ZBTB1                                                                                                                                                                                                                                                                                                                                                                                                                                                                                                                                                                                                                                                                                                |

|              |                                                                    |     |          |                                                                                                                                                                                                                                                                                                                                                                                                                                                                                                                                                                                                                                                                                                                                                                                                                                                                       |
|--------------|--------------------------------------------------------------------|-----|----------|-----------------------------------------------------------------------------------------------------------------------------------------------------------------------------------------------------------------------------------------------------------------------------------------------------------------------------------------------------------------------------------------------------------------------------------------------------------------------------------------------------------------------------------------------------------------------------------------------------------------------------------------------------------------------------------------------------------------------------------------------------------------------------------------------------------------------------------------------------------------------|
| GO:0016070   | RNA metabolic process                                              | 117 | 2,63E-03 | MORF4L1, STAT5A, LOC100158121, NAA15, FOXO3, NR2E3, NFXL1, SART3, CITED2, APP, MDR1C, WWP1, RARB, ZNF445, SAMD4A, GNL3, TBR1, HHEX, EP300, MED17, TFAP2A, TNFAIP3, NFKBIA, KEAP1, MYBL2, CCL4, NR2C2, UHMK1, DDXX46, HNRNP, LEO1, HELLS, TRAF3, TAF2, ZNF398, IKZF4, DNMT3A, SMAD7, TAF5, KLF11, MPHOSPH10, LOC100154071, RBMX, FOXP1, ATM, RNFB, ATF6, SFRP5, ETS1, WDR3, PABPC1L, PHEX, COPP5, CCNT1, ZNF518A, LOC100627422, DDR2, CDC45, KDM5B, FANCA, LOC100621389, CHUK, FTSJ3, LOC100153329, TBL1XR1, SNAPC5, CCNK, ARID5B, LDB1, SAA3, TLE4, TARS, INHBA, FANCD2, HPK3, UCHL5, CUX2, KIAA1429, SBN01, MTDH, UBE3A, ZBTB11, SAV1, NR3C1, NEO1, VARS, ZFP36L1, TFAM, SF3B1, MAP3K2, AGO1, CHD2, MYCBP, KDM3A, PHF20L1, BCL9, CHD3, CEBPA, BRD2, KAT2B, CEBPB, ZNF667, SIRT2, RGS14, SOD2, ATXN1, RPS6KA3, PAPOLA, HBZ, IRF1, NOP56, NOP56, ZBTB1, RNF111, BMPR1A |
| *GO:0032774  | RNA biosynthetic process                                           | 101 | 1,04E-04 | MORF4L1, STAT5A, LOC100158121, NAA15, FOXO3, NR2E3, NFXL1, CITED2, APP, MDR1C, WWP1, RARB, ZNF445, SAMD4A, GNL3, TBR1, HHEX, EP300, MED17, TFAP2A, TNFAIP3, NFKBIA, KEAP1, MYBL2, CCL4, NR2C2, HNRNP, LEO1, HELLS, TRAF3, ZNF398, TAF2, IKZF4, DNMT3A, SMAD7, TAF5, KLF11, LOC100154071, RBMX, FOXO1, RNFB, ATF6, SFRP5, ETS1, PHEX, COPP5, CCNT1, ZNF518A, DDR2, LOC100627422, CDC45, FANCA, KDM5B, LOC100153329, CHUK, LOC100621389, TBL1XR1, SNAPC5, CCNK, LDB1, ARID5B, SAA3, TLE4, INHBA, FANCD2, HPK3, UCHL5, CUX2, SBN01, MTDH, UBE3A, SAV1, ZBTB11, NR3C1, NEO1, TFAM, MAP3K2, CHD2, AGO1, KDM3A, MYCBP, PHF20L1, CHD3, BCL9, CEBPA, BRD2, KAT2B, CEBPB, ZNF667, SIRT2, RGS14, SOD2, ATXN1, RPS6KA3, HBZ, IRF1, ZBTB1, RNF111, BMPR1A                                                                                                                         |
| *GO:0097659  | Nucleic acid-templated transcription                               | 100 | 1,36E-04 | MORF4L1, STAT5A, LOC100158121, NAA15, FOXO3, NR2E3, NFXL1, CITED2, APP, MDR1C, WWP1, RARB, ZNF445, SAMD4A, GNL3, TBR1, HHEX, EP300, MED17, TFAP2A, TNFAIP3, NFKBIA, KEAP1, MYBL2, NR2C2, HNRNP, LEO1, HELLS, TRAF3, ZNF398, TAF2, IKZF4, DNMT3A, SMAD7, TAF5, KLF11, LOC100154071, RBMX, FOXO1, RNFB, ATF6, SFRP5, ETS1, PHEX, COPP5, CCNT1, ZNF518A, DDR2, LOC100627422, CDC45, FANCA, KDM5B, LOC100153329, CHUK, LOC100621389, TBL1XR1, SNAPC5, CCNK, LDB1, ARID5B, SAA3, TLE4, INHBA, FANCD2, HPK3, UCHL5, CUX2, SBN01, MTDH, UBE3A, SAV1, ZBTB11, NR3C1, NEO1, TFAM, MAP3K2, CHD2, AGO1, KDM3A, MYCBP, PHF20L1, CHD3, BCL9, CEBPA, BRD2, KAT2B, CEBPB, ZNF667, SIRT2, RGS14, SOD2, ATXN1, RPS6KA3, HBZ, IRF1, ZBTB1, RNF111, BMPR1A                                                                                                                               |
| *GO:0043631  | RNA polyadenylation                                                | 5   | 7,77E-03 | APP, PAPOLA, CCNT1, LEO1, PABPC1L                                                                                                                                                                                                                                                                                                                                                                                                                                                                                                                                                                                                                                                                                                                                                                                                                                     |
| *GO:0006378  | mRNA polyadenylation                                               | 5   | 6,49E-03 | APP, PAPOLA, CCNT1, LEO1, PABPC1L                                                                                                                                                                                                                                                                                                                                                                                                                                                                                                                                                                                                                                                                                                                                                                                                                                     |
| *GO:0031123  | RNA 3'-end processing                                              | 5   | 7,76E-02 | APP, PAPOLA, CCNT1, LEO1, PABPC1L                                                                                                                                                                                                                                                                                                                                                                                                                                                                                                                                                                                                                                                                                                                                                                                                                                     |
| *GO:0031124  | mRNA 3'-end processing                                             | 5   | 1,08E-02 | APP, PAPOLA, CCNT1, LEO1, PABPC1L                                                                                                                                                                                                                                                                                                                                                                                                                                                                                                                                                                                                                                                                                                                                                                                                                                     |
| *GO:0031440  | Regulation of mRNA 3'-end processing                               | 3   | 3,57E-02 | PAPOLA, CCNT1, LEO1                                                                                                                                                                                                                                                                                                                                                                                                                                                                                                                                                                                                                                                                                                                                                                                                                                                   |
| GO:0010556   | Regulation of macromolecule biosynthetic process                   | 110 | 1,67E-05 | MORF4L1, STAT5A, LOC100158121, NAA15, SYNCRIP, RPS6KB1, FOXO3, NR2E3, CITED2, APP, MDR1C, WWP1, RARB, EIF2B2, SAMD4A, GNL3, TBR1, HHEX, EP300, EIF2S1, MED17, TFAP2A, TNFAIP3, ENPP1, NFKBIA, KEAP1, MYBL2, CCL4, NR2C2, UHMK1, HNRNP, LEO1, HELLS, TRAF3, TAF2, ZNF398, IKZF4, DNMT3A, SMAD7, KLF11, LOC100154071, FXR2, RBMX, FOXP1, RNFB, ATF6, SFRP5, ETS1, PHEX, GRB7, ABCF1, SEC24A, CPEB2, COPP5, CPEB4, CCNT1, DDR2, LOC100627422, CDC45, FANCA, KDM5B, CHUK, LOC100153329, TBL1XR1, CCNK, ARID5B, LDB1, ELANE, SAA3, TLE4, EIF4G1, INHBA, FANCD2, UCHL5, SBN01, MTDH, UBE3A, SAV1, ZBTB11, NR3C1, NEO1, ZFP36L1, TFAM, MAP3K2, AGO1, CHD2, MYCBP, KDM3A, PHF20L1, BCL9, CHD3, CEBPA, BRD2, KAT2B, CEBPB, IL5, ZNF667, SIRT2, RGS14, SOD2, ATXN1, SAMD9, RPS6KA3, HBZ, IRF1, ZBTB1, RNF111, BMPR1A                                                            |
| **GO:0010557 | Positive regulation of macromolecule biosynthetic process          | 50  | 1,71E-03 | ABCF1, COPP5, STAT5A, CCNT1, NAA15, RPS6KB1, NR2E3, APP, MDR1C, RARB, SAMD4A, CHUK, GNL3, TBL1XR1, CCNK, LDB1, ELANE, TBR1, HHEX, INHBA, EP300, MED17, TFAP2A, UBE3A, NFKBIA, NR3C1, NR2C2, UHMK1, TFAM, MAP3K2, AGO1, LEO1, KDM3A, BCL9, CEBPA, IKZF4, CEBPB, KAT2B, IL5, RBMX, SIRT2, FOXO1, ATF6, RPS6KA3, ETS1, IRF1, BMPR1A, RNF111                                                                                                                                                                                                                                                                                                                                                                                                                                                                                                                              |
| **GO:0010558 | Negative regulation of macromolecule biosynthetic process          | 43  | 2,69E-03 | MORF4L1, MTDH, ENPP1, CPEB2, CPEB4, LOC100158121, SYNCRIP, NR2E3, LOC100627422, CCL4, ZFP36L1, CDC45, MDR1C, WWP1, AGO1, RARB, KDM5B, LOC100153329, SAMD4A, HELLS, CEBPA, DNMT3A, TBL1XR1, IKZF4, SMAD7, LDB1, ELANE, KLF11, LOC100154071, SAA3, TLE4, FXR2, FOXO1, SIRT2, ATXN1, RNFB, EP300, EIF2S1, HBZ, IRF1, TFAP2A, GRB7, ZBTB1                                                                                                                                                                                                                                                                                                                                                                                                                                                                                                                                 |
| *GO:2000112  | Regulation of cellular macromolecule biosynthetic process          | 105 | 6,94E-05 | MORF4L1, STAT5A, LOC100158121, NAA15, SYNCRIP, RPS6KB1, FOXO3, NR2E3, CITED2, APP, MDR1C, WWP1, RARB, EIF2B2, SAMD4A, GNL3, TBR1, HHEX, EP300, EIF2S1, MED17, TFAP2A, TNFAIP3, ENPP1, NFKBIA, KEAP1, MYBL2, NR2C2, UHMK1, HNRNP, LEO1, HELLS, TRAF3, ZNF398, TAF2, IKZF4, DNMT3A, SMAD7, KLF11, LOC100154071, RBMX, FOXO1, RNFB, ATF6, SFRP5, ETS1, PHEX, GRB7, ABCF1, CPEB2, COPP5, CPEB4, CCNT1, DDR2, LOC100627422, CDC45, FANCA, KDM5B, CHUK, LOC100153329, TBL1XR1, CCNK, LDB1, ARID5B, SAA3, TLE4, EIF4G1, INHBA, FANCD2, UCHL5, SBN01, MTDH, UBE3A, SAV1, ZBTB11, NR3C1, NEO1, ZFP36L1, TFAM, MAP3K2, CHD2, AGO1, MYCBP, KDM3A, PHF20L1, CHD3, BCL9, CEBPA, BRD2, KAT2B, CEBPB, ZNF667, SIRT2, RGS14, SOD2, ATXN1, RPS6KA3, HBZ, IRF1, ZBTB1, RNF111, BMPR1A                                                                                                   |
| *GO:0031328  | Positive regulation of cellular biosynthetic process               | 55  | 5,11E-04 | ABCF1, COPP5, STAT5A, CCNT1, NAA15, RPS6KB1, NR2E3, APP, APOA1, MDR1C, RARB, SAMD4A, CHUK, GNL3, TBL1XR1, CCNK, LDB1, ELANE, MDR1P1, TBR1, HHEX, INHBA, EP300, MED17, TFAP2A, ASS1, UBE3A, NFKBIA, UBRAP2, NR3C1, NR2C2, UHMK1, TFAM, MAP3K2, AGO1, LEO1, KDM3A, BCL9, CEBPA, TAF2, IKZF4, KAT2B, CEBPB, IL5, RBMX, FOXO1, SIRT2, SOD2, ATF6, RPS6KA3, ETS1, IRF1, RNF111, BMPR1A                                                                                                                                                                                                                                                                                                                                                                                                                                                                                     |
| *GO:0031327  | Negative regulation of cellular biosynthetic process               | 43  | 5,95E-03 | MORF4L1, MTDH, ENPP1, CPEB2, CPEB4, LOC100158121, SYNCRIP, NR2E3, LOC100627422, CCL4, ZFP36L1, CDC45, MDR1C, WWP1, AGO1, RARB, KDM5B, LOC100153329, SAMD4A, HELLS, CEBPA, DNMT3A, TBL1XR1, IKZF4, SMAD7, LDB1, ELANE, KLF11, LOC100154071, SAA3, TLE4, FXR2, FOXO1, SIRT2, ATXN1, RNFB, EP300, EIF2S1, HBZ, IRF1, TFAP2A, GRB7, ZBTB1                                                                                                                                                                                                                                                                                                                                                                                                                                                                                                                                 |
| *GO:2000113  | Negative regulation of cellular macromolecule biosynthetic process | 41  | 4,19E-03 | MORF4L1, MTDH, ENPP1, CPEB2, CPEB4, LOC100158121, SYNCRIP, NR2E3, LOC100627422, ZFP36L1, CDC45, MDR1C, WWP1, AGO1, RARB, KDM5B, LOC100153329, SAMD4A, HELLS, CEBPA, DNMT3A, TBL1XR1, IKZF4, SMAD7, LDB1, KLF11, LOC100154071, SAA3, TLE4, FXR2, FOXO1, SIRT2, ATXN1, RNFB, EP300, EIF2S1, HBZ, IRF1, TFAP2A, GRB7, ZBTB1                                                                                                                                                                                                                                                                                                                                                                                                                                                                                                                                              |
| *GO:0009893  | Positive regulation of metabolic process                           | 83  | 7,06E-03 | ABCF1, COPP5, STAT5A, CCNT1, NAA15, RPS6KB1, NR2E3, DDR2, TNFRSF11B, APP, APOA1, MDR1C, TGFA, MEN, RARB, KDM5B, SAMD4A, CHUK, GNL3, TBL1XR1, CCNK, ACTA1, ANP32B, LDB1, SOCS1, ELANE, SAA3, SOCS4, MDR1P1, TBR1, INHBA, HHEX, EP300, MED17, TFAP2A, CUX2, TNFAIP3, ASS1, UBE3A, NFKBIA, NR3C1, MDRAP2, TNFRSF4, CCL4, NR2C2, UHMK1, TFAM, TNFRSF11B, ACSL1, MAP3K2, AGO1, LEO1, PKR35, KDM3A, BCL9, CEBPA, TAF2, IKZF4, KAT2B, CEBPB, SMAD7, IL5, CHIL1, RBMX, FOXO1, SIRT2, RNFB, ATF6, EPHA4, RPS6KA3, PRLR, ETS1, IRF1, HSPD1, SH3D19, RNF111, BMPR1A                                                                                                                                                                                                                                                                                                              |
| *GO:0010604  | Positive regulation of macromolecule metabolic process             | 76  | 1,65E-02 | ABCF1, COPP5, STAT5A, CCNT1, NAA15, RPS6KB1, NR2E3, DDR2, TNFRSF11B, APP, MDR1C, TGFA, MEN, RARB, KDM5B, SAMD4A, CHUK, GNL3, TBL1XR1, CCNK, ACTA1, ANP32B, LDB1, SOCS1, ELANE, SAA3, SOCS4, TBR1, INHBA, HHEX, EP300, MED17, TFAP2A, CUX2, TNFAIP3, UBE3A, NFKBIA, NR3C1, TNFRSF4, CCL4, DTNBP1, NR2C2, UHMK1, TFAM, TNFRSF11B, ACSL1, MAP3K2, AGO1, LEO1, PKR35, KDM3A, BCL9, CEBPA, TAF2, IKZF4, KAT2B, CEBPB, SMAD7, IL5, CHIL1, RBMX, FOXO1, SIRT2, RNFB, ATF6, EPHA4, RPS6KA3, PRLR, ETS1, IRF1, HSPD1, SH3D19, RNF111, BMPR1A                                                                                                                                                                                                                                                                                                                                   |
| *GO:0031325  | Positive regulation of cellular metabolic process                  | 76  | 1,65E-02 | ABCF1, COPP5, STAT5A, CCNT1, NAA15, RPS6KB1, NR2E3, DDR2, TNFRSF11B, APP, APOA1, MDR1C, TGFA, MEN, RARB, SAMD4A, CHUK, GNL3, TBL1XR1, CCNK, ANP32B, LDB1, SOCS1, ELANE, SAA3, SOCS4, MDR1P1, TBR1, INHBA, HHEX, EP300, MED17, TFAP2A, TNFAIP3, ASS1, UBE3A, NFKBIA, NR3C1, UBRAP2, TNFRSF4, CCL4, NR2C2, UHMK1, TFAM, TNFRSF11B, ACSL1, MAP3K2, AGO1, LEO1, PKR35, KDM3A, BCL9, CEBPA, TAF2, IKZF4, KAT2B, CEBPB, SMAD7, IL5, CHIL1, RBMX, FOXO1, SIRT2, ATF6, RNFB, EPHA4, RPS6KA3, PRLR, ETS1, IRF1, HSPD1, SH3D19, RNF111, BMPR1A                                                                                                                                                                                                                                                                                                                                  |
| GO:0006793   | Phosphorus metabolic process                                       | 81  | 7,95E-03 | NUAK2, COPP5, CCNT1, DDR2, ST3GAL1, TPK1, TNFRSF11B, APP, APOA1, EIF2K3, TGFA, ATP5G, TNIP1, ATF6, CLN3, TBL1XR1, CCNK, NUOT12, LDB1, SOCS1, P6V1, EBP1, SAA3, PKN2, OL1, SOCS4, CDKL5, INHBA, HHEX, CKM, HPK3, EIF2S1, DLD, TNFAIP3, PRPS2, CROT, PPP2R2A, ME1, PHLPP1, ENPP1, BCLIP, MRRAP2, TNFRSF4, CCL4, DTNBP1, NR2C2, UHMK1, TNFRSF11B, ACSL1, LPICAT1, SNRK, DCLK3, PKR35, RPIA, INPP5B, MYOC, KAT2B, NRBF2, NCEH1, PCIF1, SMAD7, CBL, CHIL1, MPHOSPH10, TKT, CDC25C, CDKN3, AMPD3, ATM, RGS14, SIRT2, EPHA4, PPP1R9B, CBLB, PRLR, JAK3, PIP4K2A, PHEX, ABL2, MYLK, BMPR1A                                                                                                                                                                                                                                                                                    |

|             |                                                          |  |  |    |          |                                                                                                                                                                                                                                                                                                                                                                                                                                                                                                                                                                                        |
|-------------|----------------------------------------------------------|--|--|----|----------|----------------------------------------------------------------------------------------------------------------------------------------------------------------------------------------------------------------------------------------------------------------------------------------------------------------------------------------------------------------------------------------------------------------------------------------------------------------------------------------------------------------------------------------------------------------------------------------|
| *GO:0006796 | Phosphate-containing compound metabolic process          |  |  | 80 | 1.06E-02 | COPSS, NUAK2, CNT1, DDR2, ST3GAL1, TPK1, TNFRSF11B, APP, APOA1, EEF2K, TGFA, ATP5G, TNIP1, ATP8, CLN3, TBL1XR1, CCNK, NUDT12, LDB1, SOCS1, PIGV, FBP1, SAA3, PKN2, OLA1, SOCS4, CDKL5, INHBA, HHEX, CKM, HIPK3, EIF2S1, CLD, TNFAIP3, PRPS2, CROT, PPP2R2A, ME1, PHLP1, ENPP1, BCCIP, IRRAP2, TNFRSF4, DTNBP1, CCL4, TNFAIP3, PHLP1, UHMK1, TNFRSF1B, ACSL1, LPCAT1, SNRK, DCLK3, PKGSR5, RPA, RPP5B, MYOC, KAT2B, NRBF2, NCEH1, PCIF1, SMAD7, CBL, CH3L1, MPHOSPH10, TKT, CDC25C, CDKN3, AMPO3, ATM, RGS14, SIRT2, EPHA4, PPP1R9B, CBLB, PRLR, JAK3, PIP4K2A, ABL2, MYLK, BMPR1A      |
| *GO:0016310 | Phosphorylation                                          |  |  | 57 | 2.54E-02 | COPSS, NUAK2, CNT1, DDR2, ST3GAL1, APP, TNFRSF11B, APOA1, EEF2K, TGFA, TNIP1, CCNK, LDB1, SOCS1, FBP1, PKN2, SAA3, SOCS4, CDKL5, HHEX, INHBA, CKM, HIPK3, EIF2S1, CLD, TNFAIP3, PRPS2, CROT, PPP2R2A, ME1, ENPP1, BCCIP, TNFRSF4, DTNBP1, CCL4, NR2C2, UHMK1, TNFRSF1B, ACSL1, SNRK, DCLK3, PKGSR5, MYOC, KAT2B, SMAD7, CBL, CH3L1, ATM, SIRT2, RGS14, PPP1R9B, EPHA4, CBLB, PRLR, JAK3, PIP4K2A, ABL2, MYLK, BMPR1A                                                                                                                                                                   |
| *GO:0006468 | Protein amino acid phosphorylation                       |  |  | 49 | 4.29E-02 | COPSS, NUAK2, CNT1, DDR2, ST3GAL1, APP, TNFRSF11B, EEF2K, TGFA, TNIP1, CCNK, SOCS1, PKN2, SAA3, SOCS4, CDKL5, HHEX, INHBA, HIPK3, EIF2S1, TNFAIP3, PHLP1, ENPP1, BCCIP, DTNBP1, CCL4, TNFRSF4, NR2C2, UHMK1, TNFRSF1B, ACSL1, SNRK, DCLK3, PKGSR5, MYOC, KAT2B, SMAD7, CBL, CH3L1, SIRT2, RGS14, ATM, EPHA4, CBLB, PRLR, JAK3, ABL2, MYLK, BMPR1A                                                                                                                                                                                                                                      |
| *GO:0042325 | Regulation of phosphorylation                            |  |  | 41 | 9.26E-02 | PHLP1, ENPP1, COPSS, CNT1, BCCIP, TNFRSF4, DTNBP1, CCL4, DDR2, TNFRSF11B, APP, APP, TNFRSF1B, ACSL1, APOA1, EEF2K, TGFA, PKGSR5, TNIP1, MYOC, CCNK, KAT2B, NRBF2, SMAD7, LDB1, SOCS1, FBP1, CH3L1, SAA3, SOCS4, RGS14, SIRT2, HHEX, INHBA, EPHA4, PPP1R9B, CBLB, PRLR, HIPK3, TNFAIP3, BMPR1A                                                                                                                                                                                                                                                                                          |
| *GO:0043549 | Regulation of kinase activity                            |  |  | 23 | 5.86E-02 | CCNK, KAT2B, NRBF2, LDB1, SOCS1, CNT1, CBL, CH3L1, SOCS4, BCCIP, DDR2, DTNBP1, RGS14, EPHA4, HHEX, CBLB, APP, ACSL1, PRLR, HIPK3, TGFA, PKGSR5, TNFAIP3                                                                                                                                                                                                                                                                                                                                                                                                                                |
| *GO:0045859 | Regulation of protein kinase activity                    |  |  | 21 | 6.98E-02 | CCNK, KAT2B, SOCS1, CNT1, CBL, CH3L1, SOCS4, BCCIP, DDR2, DTNBP1, RGS14, EPHA4, HHEX, CBLB, APP, ACSL1, PRLR, HIPK3, TGFA, PKGSR5, TNFAIP3                                                                                                                                                                                                                                                                                                                                                                                                                                             |
| *GO:0006469 | Negative regulation of protein kinase activity           |  |  | 10 | 6.94E-02 | HHEX, CBLB, KAT2B, HIPK3, SOCS1, CBL, SOCS4, TNFAIP3, DTNBP1, RGS14                                                                                                                                                                                                                                                                                                                                                                                                                                                                                                                    |
| *GO:1904029 | Regulation of cyclin-dependent protein kinase activity   |  |  | 6  | 5.65E-02 | HHEX, CCNK, KAT2B, CNT1, BCCIP, TNFAIP3                                                                                                                                                                                                                                                                                                                                                                                                                                                                                                                                                |
| *GO:0000079 | Regulation of cyclin-dependent protein kinase activity   |  |  | 6  | 5.28E-02 | HHEX, CCNK, KAT2B, CNT1, BCCIP, TNFAIP3                                                                                                                                                                                                                                                                                                                                                                                                                                                                                                                                                |
| *GO:0061097 | Regulation of protein tyrosine kinase activity           |  |  | 5  | 3.35E-02 | APP, CBLB, CBL, TGFA, SOCS4                                                                                                                                                                                                                                                                                                                                                                                                                                                                                                                                                            |
| *GO:0061099 | Negative regulation of protein tyrosine kinase activity  |  |  | 3  | 9.97E-02 | CBLB, CBL, SOCS4                                                                                                                                                                                                                                                                                                                                                                                                                                                                                                                                                                       |
| *GO:0050732 | Negative regulation of peptidyl-tyrosine phosphorylation |  |  | 4  | 5.71E-02 | CBLB, SOCS1, CBL, SOCS4                                                                                                                                                                                                                                                                                                                                                                                                                                                                                                                                                                |
| GO:0051246  | Regulation of protein metabolic process                  |  |  | 79 | 5.36E-04 | ABCF1, SEC24A, CPEB2, COPSS, CPEB4, STAT5A, CNTN1, SYNCRIP, RPS6KB1, FOXO3, ENPEP, DDR2, TNFRSF11B, APP, APOA1, EEF2K, TGFA, MSN, NOS2, EIF2B2, TNIP1, SAMD4A, GNL3, CCNK, ANP32B, SOCS1, ELANE, SAA3, SOCS4, EIF4G1, INHBA, HHEX, RENBP, EP300, HIPK3, EIF2S1, SERPINB1, TNFAIP3, PHLP1, RAD23B, SSH1, ENPP1, UBE3A, NFKBIA, AZIN1, BCCIP, TNFRSF4, CCL4, DTNBP1, UHMK1, ZFP36L1, TNFRSF1B, ACSL1, LPCAT1, AGO1, PKGSR5, KDM3A, NTFP5B, TRIP12, MYOC, TRAF3, KAT2B, SMAD7, CBL, IL9, CH3L1, FXR2, RGS14, SIRT2, EPHA4, PPP1R9B, CBLB, PRLR, IRF1, HSPD1, SH3D19, GRB7, RNF111, BMPR1A |
| *GO:0032268 | Regulation of cellular protein metabolic process         |  |  | 68 | 1.05E-02 | ABCF1, CPEB2, COPSS, CPEB4, CNT1, SYNCRIP, RPS6KB1, FOXO3, DDR2, TNFRSF11B, APP, APOA1, EEF2K, TGFA, MSN, EIF2B2, TNIP1, SAMD4A, GNL3, CCNK, ANP32B, SOCS1, SAA3, SOCS4, EIF4G1, INHBA, HHEX, RENBP, EP300, HIPK3, EIF2S1, SERPINB1, TNFAIP3, PHLP1, RAD23B, SSH1, ENPP1, UBE3A, NFKBIA, BCCIP, TNFRSF4, DTNBP1, CCL4, UHMK1, ZFP36L1, TNFRSF1B, ACSL1, AGO1, PKGSR5, KDM3A, TRIP12, MYOC, KAT2B, SMAD7, CBL, CH3L1, FXR2, SIRT2, RGS14, EPHA4, PPP1R9B, CBLB, PRLR, HSPD1, SH3D19, GRB7, RNF111, BMPR1A                                                                               |
| GO:0070887  | Cellular response to chemical stimulus                   |  |  | 76 | 2.82E-04 | GGA, FGF7, CPEB2, COPSS, STAT5A, CPEB4, SYNCRIP, RPS6KB1, FOXO3, CITED2, APOA1, CXCR4, IL4R, MSN, NOS2, CASP1, CHUK, LY96, SOCS1, FBP1, SAA3, SOCS4, UBR1, RAD52, IFNAR1, HHEX, RAB11FIP2, EP300, GNAQ, FANCD2, MED17, RYR1, RAB14, TFAP2A, RAB13, CUX2, TNFAIP3, JAM3, AMCF-I, MTDH, SSH1, ENPP1, UBE3A, DIAPH1, CXCL2, NFKBIA, CXCL8, NR3C1, NED1, CCL4, CCL28, TNFRSF1B, ACSL1, AGO1, KDM3A, TRAF3, CEBPA, PDK1, DNMT3A, KAT2B, MLC1, NCEH1, SMAD7, CH3L1, ACACA, RBMX, SIRT2, SOD2, ATF6, PPP1R9B, PRLR, IRF1, JAK3, LHB, ABL2, RNF111                                             |
| *GO:0010033 | Response to organic substance                            |  |  | 76 | 2.91E-04 | GGA, FGF7, CPEB2, COPSS, STAT5A, CPEB4, SYNCRIP, RPS6KB1, FOXO3, AQP3, CITED2, TNFRSF11B, APOA1, CXCR4, IL4R, MSN, NOS2, CASP1, CHUK, LY96, SOCS1, ELANE, SOCS4, UBR1, IFNAR1, HHEX, RAB11FIP2, EP300, GNAQ, MED17, RYR1, RAB14, CUX2, TNFAIP3, PPP2R2A, AMCF-I, ME1, MTDH, SSH1, ENPP1, UBE3A, DIAPH1, FFAR1, GDAPI, CXCL2, NFKBIA, CXCL8, ABHD2, NR3C1, NED1, TNFRSF4, CCL4, TNFRSF1B, ACSL1, AGO1, KDM3A, TRAF3, CEBPA, DNMT3A, KAT2B, MLC1, SMAD7, CH3L1, ACACA, RBMX, SIRT2, ATF6, PPP1R9B, RPS6KB3, PRLR, IRF1, HSPD1, JAK3, LHB, ABL2, RNF111                                   |
| *GO:0071310 | Cellular response to organic substance                   |  |  | 64 | 2.83E-04 | GGA, FGF7, COPSS, CPEB2, STAT5A, CPEB4, SYNCRIP, RPS6KB1, FOXO3, CITED2, APOA1, CXCR4, IL4R, MSN, NOS2, CASP1, CHUK, LY96, SOCS1, SOCS4, UBR1, IFNAR1, HHEX, RAB11FIP2, EP300, MED17, RYR1, RAB14, CUX2, TNFAIP3, AMCF-I, MTDH, ENPP1, SSH1, DIAPH1, UBE3A, CXCL2, NFKBIA, CXCL8, NR3C1, NED1, CCL4, TNFRSF1B, ACSL1, AGO1, KDM3A, TRAF3, CEBPA, DNMT3A, KAT2B, MLC1, SMAD7, ACACA, CH3L1, RBMX, SIRT2, ATF6, PPP1R9B, PRLR, IRF1, JAK3, LHB, ABL2, RNF111                                                                                                                             |
| *GO:0033993 | Response to lipid                                        |  |  | 27 | 6.34E-04 | AMCF-II, MTDH, UBE3A, CXCL2, FFAR1, GDAPI, CXCL8, NFKBIA, ABHD2, NR3C1, TNFRSF4, AQP3, TNFRSF1B, TNFRSF1B, KDM3A, NOS2, MSN, CASP1, MLC1, LY96, ELANE, IFNAR1, RPS6KB3, EP300, MED17, TNFAIP3, ABL2                                                                                                                                                                                                                                                                                                                                                                                    |
| *GO:0071396 | Cellular response to lipid                               |  |  | 14 | 9.36E-02 | MTDH, MLC1, LY96, UBE3A, NFKBIA, NR3C1, TNFRSF1B, EP300, MED17, KDM3A, NOS2, MSN, TNFAIP3, ABL2                                                                                                                                                                                                                                                                                                                                                                                                                                                                                        |
| *GO:0034097 | Response to cytokine                                     |  |  | 22 | 3.97E-02 | AMCF-II, STAT5A, SOCS1, CXCL2, CH3L1, SYNCRIP, CXCL8, SOCS4, FOXO3, CCL4, RBMX, IFNAR1, APOA1, ACSL1, PRLR, CXCR4, IL4R, RFI1, NOS2, JAK3, CHUK, TRAF3                                                                                                                                                                                                                                                                                                                                                                                                                                 |
| *GO:0071345 | Cellular response to cytokine stimulus                   |  |  | 22 | 1.06E-02 | AMCF-II, STAT5A, SOCS1, CXCL2, CH3L1, SYNCRIP, CXCL8, SOCS4, FOXO3, CCL4, RBMX, IFNAR1, APOA1, ACSL1, PRLR, CXCR4, IL4R, RFI1, NOS2, JAK3, CHUK, TRAF3                                                                                                                                                                                                                                                                                                                                                                                                                                 |
| *GO:0010243 | Response to organonitrogen compound                      |  |  | 17 | 7.98E-02 | DNMT3A, KAT2B, SSH1, CPEB2, ENPP1, DIAPH1, CPEB4, SOCS1, NFKBIA, RPS6KB1, UBR1, SIRT2, PPP1R9B, RYR1, CASP1, TNFAIP3, PPP2R2A                                                                                                                                                                                                                                                                                                                                                                                                                                                          |
| *GO:0032870 | Cellular response to hormone stimulus                    |  |  | 16 | 9.35E-02 | GGA, KAT2B, CPEB2, ENPP1, UBE3A, STAT5A, SOCS1, ACACA, RPS6KB1, NR3C1, ACSL1, EP300, PRLR, MED17, KDM3A, LHB                                                                                                                                                                                                                                                                                                                                                                                                                                                                           |
| *GO:0009755 | Hormone-mediated signaling pathway                       |  |  | 9  | 4.65E-02 | EP300, ACSL1, PRLR, UBE3A, STAT5A, MED17, KDM3A, NR3C1, LHB                                                                                                                                                                                                                                                                                                                                                                                                                                                                                                                            |
| *GO:0071407 | Cellular response to organic cyclic compound             |  |  | 15 | 4.74E-02 | CEBPA, MLC1, SSH1, UBE3A, DIAPH1, RPS6KB1, NR3C1, SIRT2, PPP1R9B, EP300, MED17, AGO1, RYR1, KDM3A, MSN                                                                                                                                                                                                                                                                                                                                                                                                                                                                                 |
| *GO:1901700 | Response to oxygen-containing compound                   |  |  | 39 | 2.04E-03 | AMCF-II, MTDH, ENPP1, SSH1, CPEB2, CPEB4, CXCL2, FFAR1, GDAPI, CXCL8, NFKBIA, ABHD2, RPS6KB1, TNFRSF4, AQP3, TNFRSF1B, TNFRSF11B, NOS2, MSN, CASP1, DNMT3A, KAT2B, MLC1, STX2, LY96, ELANE, SOCS1, ACACA, APTX, UBR1, SIRT2, IFNAR1, SOD2, RAB11FIP2, RPS6KB3, GNAQ, TXNRD1, TNFAIP3, ABL2                                                                                                                                                                                                                                                                                             |
| *GO:1901701 | Cellular response to oxygen-containing compound          |  |  | 23 | 6.52E-02 | DNMT3A, KAT2B, MTDH, MLC1, SSH1, ENPP1, CPEB2, LY96, CPEB4, SOCS1, ACACA, NFKBIA, RPS6KB1, UBR1, SIRT2, SOD2, RAB11FIP2, TNFRSF1B, GNAQ, NOS2, MSN, TNFAIP3, ABL2                                                                                                                                                                                                                                                                                                                                                                                                                      |
| *GO:1901699 | Cellular response to nitrogen compound                   |  |  | 15 | 7.37E-02 | DNMT3A, PPP1R9B, KAT2B, SSH1, GNAQ, ENPP1, CPEB2, DIAPH1, CPEB4, SOCS1, AGO1, RYR1, RPS6KB1, UBR1, SIRT2                                                                                                                                                                                                                                                                                                                                                                                                                                                                               |
| GO:0071417  | Cellular response to organonitrogen compound             |  |  | 13 | 7.06E-02 | DNMT3A, PPP1R9B, KAT2B, SSH1, ENPP1, CPEB2, DIAPH1, CPEB4, SOCS1, RYR1, RPS6KB1, UBR1, SIRT2                                                                                                                                                                                                                                                                                                                                                                                                                                                                                           |
| GO:0044085  | Cellular component biogenesis                            |  |  | 72 | 7.72E-02 | ABCF1, TLN1, ATL2, ATL3, SART3, WHAMM, TRIM4, CDC45, APP, APOA1, MSN, WDR35, FTSJ3, LOC100621389, GNL3, ABCE1, STX1A, STX2, ACTA1, ANP32B, LDB1, FBP1, PKN2, DECY1, MID1P1, RAD52, TMEM67, ARPC1B, RAB14, RAB13, CUX2, SNAP29, ME1, CALY, SSH1, DIAPH1, GPM6B, ARPC5, MYBL2, SF3B1, RPS27, ATXN2L, DNAAF1, AGO1, DNAJA4, ACSL3, MYOC, HELLS, HSD17B8, LOC100156127, SELP, BRD2, MLC1, SMAD7, ACACA, MPHOSPH10, ARFIP1, DENR, FOXF1, SIRT2, NCKAP1, SAMD8, PRLR, CABIN1, WDR3, NOP58, DNAJB1, NOP56, PIP4K2A, ZBTB1, GRB7, TBC1D20                                                      |
| GO:0009892  | Negative regulation of metabolic process                 |  |  | 67 | 5.54E-03 | MORF4L1, CPEB2, CPEB4, CCNT1, LOC100158121, SYNCRIP, NR1E3, LOC10057422, CDC45, APP, MDC1C, WWI, NOS2, RARB, KDM5B, TNIP1, LOC100153329, SAMD4A, TBL1XR1, LDB1, SOCS1, ELANE, FBP1, SAA3, TLE4, SOCS4, HHEX, RENBP, EP300, HIPK3, EIF2S1, SERPINB1, TFAP2A, TNFAIP3, MTDH, ENPP1, AZIN1, DTNBP1, CCL4, ZFP36L1, LPCAT1, AGO1, KDM3A, TRIP12, HELLS, CEBPA, DNMT3A, IKZF4, KAT2B, PCIF1, SMAD7, CBL, KLF11, LOC100154071, MPHOSPH10, FXR2, FOXF1, SIRT2, RGS14, RNFB, ATXN1, CBLB, PARPBP, HBZ, IRF1, ZBTB1, GRB7                                                                       |

|              |                                                                   |                                                                            |  |              |                                                                           |          |                                                                                                                                                                                                                                                                                                                                                                                                                                                                                             |                                     |
|--------------|-------------------------------------------------------------------|----------------------------------------------------------------------------|--|--------------|---------------------------------------------------------------------------|----------|---------------------------------------------------------------------------------------------------------------------------------------------------------------------------------------------------------------------------------------------------------------------------------------------------------------------------------------------------------------------------------------------------------------------------------------------------------------------------------------------|-------------------------------------|
| GO:0031324   | Negative regulation of cellular metabolic process                 |                                                                            |  |              | 64                                                                        | 5.48E-03 | MORF4L1, CPEB2, CPEB4, CNTN1, LOC100158121, SYNCRIP, NR2E3, LOC100827422, CDC45, APP, MDR1C, WWP1, RARB, KDM5B, TNIP1, LOC100155329, SAMDA4, TBL1XR1, LDB1, SOCS1, ELANE, FBP1, SAA3, TLE4, SOCS4, HHEX, RENBP, EP300, HIPK3, EIF2S1, SERPBN1, TFAP2A, TNFAIP3, MTDH, ENPP1, DTNBP1, CCL4, ZFP36L1, AGO1, KDM3A, TRIP12, HELLS, CEBPA, DNMT3A, IKZF4, KAT2B, PCF1, SMAD7, CBL, KLF11, LOC100154071, MPHOSPH10, FXR2, FOXF1, SIRT2, RGS14, RNFB, ATXN1, CBLB, PARPBP, HBZ, IRF1, ZBTB1, GRB7 |                                     |
|              | *GO:0032269                                                       | Negative regulation of cellular protein metabolic process                  |  |              | 28                                                                        | 5.78E-02 | CPEB2, ENPP1, CPEB4, SYNCRIP, DTNBP1, ZFP36L1, APP, AGO1, KDM3A, TNIP1, SAMDA4, TRIP12, KAT2B, SMAD7, SOCS1, CBL, SOCS4, FXR2, RGS14, SIRT2, HHEX, RENBP, CBLB, HIPK3, EIF2S1, SERPBN1, TNFAIP3, GRB7                                                                                                                                                                                                                                                                                       |                                     |
| *GO:0010605  | Negative regulation of macromolecule metabolic process            |                                                                            |  |              | 63                                                                        | 4.06E-03 | MORF4L1, CPEB2, CPEB4, CNTN1, LOC100158121, SYNCRIP, NR2E3, LOC100827422, CDC45, APP, MDR1C, WWP1, NOS2, RARB, KDM5B, TNIP1, LOC100155329, SAMDA4, TBL1XR1, LDB1, SOCS1, ELANE, SAA3, TLE4, SOCS4, HHEX, RENBP, EP300, HIPK3, EIF2S1, SERPBN1, TFAP2A, TNFAIP3, MTDH, ENPP1, AZN1, DTNBP1, CCL4, ZFP36L1, AGO1, KDM3A, TRIP12, HELLS, CEBPA, DNMT3A, IKZF4, KAT2B, SMAD7, CBL, KLF11, LOC100154071, FXR2, FOXF1, SIRT2, RGS14, RNFB, ATXN1, CBLB, PARPBP, HBZ, IRF1, ZBTB1, GRB7            |                                     |
|              | *GO:0051248                                                       | Negative regulation of protein metabolic process                           |  |              | 31                                                                        | 2.84E-02 | CPEB2, ENPP1, CPEB4, SYNCRIP, AZN1, DTNBP1, ZFP36L1, APP, AGO1, KDM3A, NOS2, TNIP1, SAMDA4, TRIP12, KAT2B, SMAD7, ELANE, SOCS1, CBL, SOCS4, FXR2, RGS14, SIRT2, HHEX, RENBP, CBLB, HIPK3, EIF2S1, SERPBN1, TNFAIP3, GRB7                                                                                                                                                                                                                                                                    |                                     |
| GO:0007166   | Cell surface receptor signaling pathway                           |                                                                            |  |              | 64                                                                        | 5,65E-02 | FGF7, STAT5A, RPS6KB1, FOXO3, CITED2, APP, APOA1, CXCR4, IL4R, TGFA, INSR, TBL1XR1, STX1A, LY96, LDB1, ARID5B, SOCS1, TLE4, SOCS4, PTPRU, IFNAR1, HHEX, INHBA, GNAQ, RAB14, CHSY1, CUX2, TNFAIP3, AMCF-II, ITGAL, MTDH, ENPP1, PITCHD1, CD247, CXCL2, NFKBIA, CXCL8, NEO1, GCLM, CCL4, PE415, IL17D, TNFRSF1B, ACSL1, ITGB7, MYOC, BCL9, TRAF3, CEBPA, NCEH1, SMAD7, CBL, SIRT2, SFRP5, CBLB, RNF115, PRLR, PLN, IRF1, JAK3, CD79A, ABL2, RNF111, BMP1A                                     |                                     |
| *GO:0007167  | Enzyme linked receptor protein signaling pathway                  |                                                                            |  |              | 26                                                                        | 5.33E-02 | FGF7, ENPP1, RPS6KB1, NEO1, CITED2, APP, TGFA, INSR, MYOC, NCEH1, SMAD7, ARID5B, SOCS1, CBL, SOCS4, SIRT2, INHBA, HHEX, CBLB, RNF115, PRLR, RAB14, JAK3, ABL2, RNF111, BMP1A                                                                                                                                                                                                                                                                                                                |                                     |
| *GO:0007169  | Transmembrane receptor protein tyrosine kinase signaling pathway  |                                                                            |  |              | 19                                                                        | 2.45E-02 | FGF7, ENPP1, ARID5B, SOCS1, CBL, SOCS4, RPS6KB1, SIRT2, HHEX, CBLB, APP, RNF115, PRLR, RAB14, TGFA, JAK3, INSR, ABL2, MYOC                                                                                                                                                                                                                                                                                                                                                                  |                                     |
|              | *GO:0038127                                                       | ERBB signaling pathway                                                     |  |              | 7                                                                         | 1.88E-02 | APP, CBLB, RNF115, CBL, TGFA, SOCS4, MYOC                                                                                                                                                                                                                                                                                                                                                                                                                                                   |                                     |
|              | **GO:1901184                                                      | Regulation of ERBB signaling pathway                                       |  |              | 6                                                                         | 3.95E-03 | APP, CBLB, RNF115, CBL, TGFA, SOCS4                                                                                                                                                                                                                                                                                                                                                                                                                                                         |                                     |
|              |                                                                   |                                                                            |  | *GO:1901185  | Negative regulation of ERBB signaling pathway                             | 4        | 7.48E-03                                                                                                                                                                                                                                                                                                                                                                                                                                                                                    | CBLB, RNF115, CBL, SOCS4            |
|              |                                                                   |                                                                            |  | *GO:0007173  | Epidermal growth factor receptor signaling pathway                        | 6        | 3.40E-02                                                                                                                                                                                                                                                                                                                                                                                                                                                                                    | APP, CBLB, RNF115, CBL, TGFA, SOCS4 |
|              |                                                                   |                                                                            |  | **GO:0042058 | Regulation of epidermal growth factor receptor signaling pathway          | 6        | 2.81E-03                                                                                                                                                                                                                                                                                                                                                                                                                                                                                    | APP, CBLB, RNF115, CBL, TGFA, SOCS4 |
|              |                                                                   |                                                                            |  | *GO:0042059  | Negative regulation of epidermal growth factor receptor signaling pathway | 4        | 7.48E-03                                                                                                                                                                                                                                                                                                                                                                                                                                                                                    | CBLB, RNF115, CBL, SOCS4            |
|              | *GO:0019221                                                       | Cytokine-mediated signaling pathway                                        |  |              | 17                                                                        | 2.63E-02 | AMCF-II, STAT5A, SOCS1, CXCL2, CXCL8, SOCS4, FOXO3, CCL4, IFNAR1, APOA1, ACSL1, PRLR, CXCR4, IL4R, IRF1, JAK3, TRAF3                                                                                                                                                                                                                                                                                                                                                                        |                                     |
|              | *GO:0070098                                                       | Chemokine-mediated signaling pathway                                       |  |              | 5                                                                         | 7.23E-02 | AMCF-II, CXCR4, CXCL2, CXCL8, CCL4                                                                                                                                                                                                                                                                                                                                                                                                                                                          |                                     |
| GO:0043933   | Macromolecular complex subunit organization                       |                                                                            |  |              | 63                                                                        | 8.96E-03 | MORF4L1, ATL2, ATL3, LOC100158121, SART3, DDR2, WHAMM, TRIM4, CDC45, APOA1, MSN, LOC100153329, LOC100621389, TBL1XR1, ABCE1, STX1A, ANP32B, STX2, LDB1, FBP1, DECR1, MID1IP1, RAD52, ARPC1B, EP300, KDM2A, SMARCA1, ME1, SNAP29, CALY, DIAPH1, ARPC5, NR3C1, SFRB1, RPS27, ATXN2L, AGO1, LEO1, KDM3A, ACSL3, TRIP12, HELLS, HSD17B8, CHD3, LOC100156127, DNMT3A, SELP, BRD2, KAT2B, MLC1, LOC100154071, ACACA, ARFIP1, DENR, ATM, SIRT2, NCKAP1, RNFB, PRLR, CABIN1, ZBTB1, GRB7, TBC1D20   |                                     |
| *GO:0006325  | Chromatin organization                                            |                                                                            |  |              | 27                                                                        | 2.81E-03 | MORF4L1, LOC100158121, NR3C1, CDC45, LEO1, KDM3A, LOC100153329, LOC100621389, HELLS, TRIP12, CHD3, LOC100156127, DNMT3A, TBL1XR1, BRD2, KAT2B, ANP32B, LDB1, LOC100154071, SIRT2, ATM, RNFB, EP300, KDM2A, CABIN1, SMARCA1, ZBTB1                                                                                                                                                                                                                                                           |                                     |
| *GO:0016569  | Covalent chromatin modification                                   |                                                                            |  |              | 15                                                                        | 6.43E-02 | MORF4L1, TBL1XR1, DNMT3A, KAT2B, LDB1, NR3C1, SIRT2, ATM, RNFB, EP300, KDM2A, LEO1, KDM3A, HELLS, TRIP12                                                                                                                                                                                                                                                                                                                                                                                    |                                     |
| *GO:0005003  | Macromolecular complex assembly                                   |                                                                            |  |              | 43                                                                        | 4.79E-02 | ME1, SNAP29, CALY, ATL2, DIAPH1, ATL3, ARPC5, SART3, WHAMM, TRIM4, SFRB1, RPS27, CDC45, APOA1, ATXN2L, AGO1, MSN, ACSL3, LOC100621389, HELLS, HSD17B8, LOC100156127, SELP, BRD2, STX1A, MLC1, STX2, ANP32B, FBP1, ACACA, DECR1, MID1IP1, ARFIP1, DENR, RAD52, SIRT2, NCKAP1, ARPC1B, PRLR, CABIN1, GRB7, ZBTB1, TBC1D20                                                                                                                                                                     |                                     |
|              | *GO:0051262                                                       | Protein tetramerization                                                    |  |              | 6                                                                         | 8.12E-02 | ME1, ACACA, FBP1, DECR1, LOC100621389, HSD17B8                                                                                                                                                                                                                                                                                                                                                                                                                                              |                                     |
| GO:0009605   | Response to external stimulus                                     |                                                                            |  |              | 58                                                                        | 2,53E-02 | NUAK2, STAT5A, TNFRSF11B, APP, APOA1, CXCR4, IL4R, SLC22A3, NOS2, CASP1, FANCA, TNIP1, TBL1XR1, STX2, LY96, ELANE, SAA3, CHST3, PPP1CC, TBR1, PROC, IFNAR1, GNAQ, FANCD2, CLIC5, EIF2S1, RAB14, RAB15, TNFAIP3, JAM3, AMCF-II, PHLPP1, MTDH, CXCL2, ENPP4, NFKBIA, CXCL8, NEO1, TNFRSF4, CCL28, CCL4, TNFRSF1B, MAP3K2, KLB1, SERPINB10, MYOC, IQSEC2, CHD3, PDK1, MAP1A, ARFIP1, DENR, RGS14, ATM, FOXF1, NCKAP1, PPP1R9B, CEP68, SYNM, TBC1D20, ABL2, GFR2                                |                                     |
| **GO:0009607 | Response to biotic stimulus                                       |                                                                            |  |              | 28                                                                        | 6.31E-02 | AMCF-II, MTDH, CXCL2, CXCL8, NFKBIA, TNFRSF4, TNFRSF11B, TNFRSF1B, IL4R, SERPINB10, NOS2, CASP1, TRAF3, CEBPE, LY96, ELANE, LGALS8, CHST3, FXR2, SIRT2, IFNAR1, RPS6KA3, EIF2S1, APOA1, HSPD1, TNFAIP3, TMC01                                                                                                                                                                                                                                                                               |                                     |
|              | *GO:0071216                                                       | Cellular response to biotic stimulus                                       |  |              | 8                                                                         | 7.09E-02 | TNFRSF1B, MTDH, LY96, NFKBIA, NOS2, TNFAIP3, TMC01, SIRT2                                                                                                                                                                                                                                                                                                                                                                                                                                   |                                     |
|              | *GO:0009617                                                       | Response to bacterium                                                      |  |              | 18                                                                        | 1.63E-02 | AMCF-II, MTDH, CEBPE, LY96, ELANE, CXCL2, NFKBIA, CXCL8, TNFRSF4, SIRT2, IFNAR1, TNFRSF11B, TNFRSF1B, RPS6KA3, RAB14, NOS2, CASP1, TNFAIP3                                                                                                                                                                                                                                                                                                                                                  |                                     |
|              | *GO:0002237                                                       | Response to molecule of bacterial origin                                   |  |              | 16                                                                        | 7.28E-04 | AMCF-II, MTDH, LY96, ELANE, CXCL2, NFKBIA, CXCL8, TNFRSF4, SIRT2, IFNAR1, TNFRSF1B, RPS6KA3, TNFRSF11B, NOS2, CASP1, TNFAIP3                                                                                                                                                                                                                                                                                                                                                                |                                     |
|              | *GO:0071219                                                       | Cellular response to molecule of bacterial origin                          |  |              | 7                                                                         | 6.03E-02 | TNFRSF1B, MTDH, LY96, NFKBIA, NOS2, TNFAIP3, SIRT2                                                                                                                                                                                                                                                                                                                                                                                                                                          |                                     |
|              | *GO:0032496                                                       | Response to lipopolysaccharide                                             |  |              | 15                                                                        | 1.17E-03 | AMCF-II, MTDH, LY96, ELANE, CXCL2, NFKBIA, CXCL8, TNFRSF4, IFNAR1, TNFRSF1B, RPS6KA3, TNFRSF11B, NOS2, CASP1, TNFAIP3                                                                                                                                                                                                                                                                                                                                                                       |                                     |
| GO:0005009   | Regulation of molecular function                                  |                                                                            |  |              | 57                                                                        | 9,58E-02 | COPB5, CNTN1, DDR2, TBC1D16, APP, APOA1, TGFA, NQO1, FANCA, CCKN, SCN2B, ANP32B, LDB1, ARID5B, SOCS1, SOCS4, MID1IP1, HHEX, RENBP, SSGM1, EP300, GNAQ, FANCD2, HIPK3, SERPINB1, TNFAIP3, MTDH, SAV1, NFKBIA, BCCIP, KEAP1, DTNBP1, GCLM, CCL4, ACSL1, PIK3R5, TRAF3, KAT2B, NRBF2, CEBPB, PCGF1, SMAD7, CBL, MPHOSPH10, CH3L1, SIRT2, RGS14, SOD2, SFRP5, EPHA4, CBLB, PRLR, PLN, HSPD1, ABL2, CSN2                                                                                         |                                     |
| *GO:0043086  | Negative regulation of catalytic activity                         |                                                                            |  |              | 20                                                                        | 7.73E-02 | KAT2B, PCGF1, SMAD7, SOCS1, CBL, MPHOSPH10, SOCS4, DTNBP1, RGS14, HHEX, CBLB, APP, RENBP, APOA1, HIPK3, PLN, SERPINB1, TNFAIP3, NQO1, CSN2                                                                                                                                                                                                                                                                                                                                                  |                                     |
| GO:0051348   | Negative regulation of transferase activity                       |                                                                            |  |              | 11                                                                        | 6.98E-02 | HHEX, CBLB, KAT2B, SMAD7, HIPK3, SOCS1, CBL, SOCS4, TNFAIP3, DTNBP1, RGS14                                                                                                                                                                                                                                                                                                                                                                                                                  |                                     |
| *GO:0010469  | Regulation of receptor activity                                   |                                                                            |  |              | 6                                                                         | 7.24E-02 | APP, CBLB, PLN, CBL, TGFA, SOCS4                                                                                                                                                                                                                                                                                                                                                                                                                                                            |                                     |
| *GO:0007176  | Regulation of epidermal growth factor-activated receptor activity |                                                                            |  |              | 5                                                                         | 8.47E-04 | APP, CBLB, CBL, TGFA, SOCS4                                                                                                                                                                                                                                                                                                                                                                                                                                                                 |                                     |
|              | *GO:0007175                                                       | Negative regulation of epidermal growth factor-activated receptor activity |  |              | 3                                                                         | 2.01E-02 | CBLB, CBL, SOCS4                                                                                                                                                                                                                                                                                                                                                                                                                                                                            |                                     |
| GO:1902589   | Single-organism organelle organization                            |                                                                            |  |              | 52                                                                        | 5,08E-02 | TLN1, NUAK2, SLC6A1, POLM3, WHAMM, APOA1, CAMSAP2, SLC22A3, MCOLN1, WDR35, STX1A, ACTA1, STX2, CHST3, MID1IP1, TACC2, TMEM67, ARPC1B, SPATA18, EIF2S1, MCMBP, JAM3, ANKYF1, SNAP29, SSH1, DIAPH1, GDAF1, EEA1, ARPC5, MYBL2, DTNBP1, TPM1, NR2C2, DNAAF1, SERPINB10, MYOC, IQSEC2, CHD3, PDK1, MAP1A, ARFIP1, DENR, RGS14, ATM, FOXF1, NCKAP1, PPP1R9B, CEP68, SYNM, TBC1D20, ABL2, GFR2                                                                                                    |                                     |
| GO:0042592   | Homeostatic process                                               |                                                                            |  |              | 51                                                                        | 8,14E-03 | SEC24A, STAT5A, FOXO3, AQP3, CITED2, APP, APOA1, SLC22A5, GNJ3, CLN3, SITI1, SCN2B, LDB1, INHBA, DCLRE1A, RAB11FIP2, RHOG, TNFSF13B, DLD, RYR1, TXNRD1, TNFAIP3, JAM3, TMC01, AMCF-II, ENPP1, DIAPH1, TMX4, FFAR1, NEO1, MRAP2, GCLM, CCL28, LPCAT1, SLC31A2, MYOC, ETFA, CEBPA, KLF13, ACACA, AMPD3, ATM, SOD2, ABCG8, ETS1, PYGL, PLN, HBZ, JAK3, TBC1D20, ABL2                                                                                                                           |                                     |
| *GO:0048872  | Homeostasis of number of cells                                    |                                                                            |  |              | 16                                                                        | 3.79E-04 | AMCF-II, SITI1, KLF13, LDB1, STAT5A, FOXO3, AMPD3, CITED2, INHBA, TNFSF13B, ETS1, HBZ, SLC22A5, JAK3, TNFAIP3, JAM3                                                                                                                                                                                                                                                                                                                                                                         |                                     |
| *GO:0002262  | Myeloid cell homeostasis                                          |                                                                            |  |              | 10                                                                        | 3.58E-03 | INHBA, ETS1, KLF13, LDB1, STAT5A, HBZ, FOXO3, AMPD3, JAM3, CITED2                                                                                                                                                                                                                                                                                                                                                                                                                           |                                     |
| *GO:0034101  | Erythrocyte homeostasis                                           |                                                                            |  |              | 9                                                                         | 4.09E-03 | INHBA, ETS1, KLF13, LDB1, STAT5A, HBZ, FOXO3, AMPD3, CITED2                                                                                                                                                                                                                                                                                                                                                                                                                                 |                                     |
| *GO:0001776  | Leukocyte homeostasis                                             |                                                                            |  |              | 7                                                                         | 9.94E-03 | AMCF-II, SITI1, TNFSF13B, STAT5A, JAK3, TNFAIP3, JAM3                                                                                                                                                                                                                                                                                                                                                                                                                                       |                                     |

|             |                                                     |              |                                                                                  |    |          |                                                                                                                                                                                                                                                                                                                                                                      |
|-------------|-----------------------------------------------------|--------------|----------------------------------------------------------------------------------|----|----------|----------------------------------------------------------------------------------------------------------------------------------------------------------------------------------------------------------------------------------------------------------------------------------------------------------------------------------------------------------------------|
|             |                                                     | *GO:0002260  | Lymphocyte homeostasis                                                           | 5  | 5.76E-02 | SIT1, TNFSF13B, STAT5A, JAK3, TNFAIP3                                                                                                                                                                                                                                                                                                                                |
| GO:0048584  | Positive regulation of response to stimulus         |              |                                                                                  | 50 | 7.47E-02 | MASP1, STAT5A, CITED2, TNFRSF11B, APOA1, IL4R, TGFA, CASP1, TNIP1, STX1A, LY96, SOCS1, ELANE, SAA3, HHEX, INHBA, TNFSF13B, CHSY1, CUX2, TNFAIP3, AMCF-II, MTDH, UBES3A, CXCL2, ENPP4, CD247, NFKBIA, CXCL8, NEO1, CCL4, TNFRSF4, PEA15, TNFRSF18, AGO1, PIK3R5, MYOC, TRAF3, SELP, CBL, CH3L1, RNF8, EPHA4, RPS6KA3, ETS1, IRF1, HSPD1, CD79A, ZBTB1, BMPR1A, RNF111 |
| *GO:0031349 | Positive regulation of defense response             |              |                                                                                  | 11 | 6.28E-02 | RPS6KA3, ETS1, LY96, STAT5A, IRF1, NFKBIA, HSPD1, TNFAIP3, TNIP1, CCL4, TRAF3                                                                                                                                                                                                                                                                                        |
| GO:0044248  | Cellular catabolic process                          |              |                                                                                  | 49 | 9.02E-03 | RAD23B, ENPP1, UBES3A, KEAP1, ABHD2, ENPEP, ALDH1L2, UHMK1, ZFP36L1, DDHD2, CYLD, CUL5, TNFRSF18, APOA1, WWP1, AGO1, NOS2, MSN, FBXO9, TRIP12, SAMD4A, ETFA, HECTD1, TBL1XR1, NUDT12, SMAD7, CBL, SAA3, SOCS4, DECR1, UBR1, ATM, PSMB8, CLPX, SIRT2, RNF8, CTSK, RENBP, RNF115, PYGM, PYGL, SPATA18, UCHL5, SH3D19, TNFAIP3, CROT, RNF111                            |
| *GO:0009057 | Macromolecule catabolic process                     |              |                                                                                  | 42 | 2.48E-03 | RAD23B, UBES3A, KEAP1, AZIN1, UHMK1, ZFP36L1, CYLD, CUL5, TNFRSF18, LPCAT1, WWP1, AGO1, NOS2, MSN, FBXO9, TRIP12, SAMD4A, HECTD1, TBL1XR1, SMAD7, CBL, CH3L1, SOCS4, UBR1, PAG6, ATM, PSMB8, CLPX, SIRT2, RNF8, LYVE1, CTSK, RNF115, PYGM, PYGL, SPATA18, UCHL5, SH3D19, TNFAIP3, RNF111                                                                             |
| *GO:0044265 | Cellular macromolecule catabolic process            |              |                                                                                  | 32 | 3.15E-02 | RAD23B, UBES3A, KEAP1, UHMK1, ZFP36L1, CYLD, CUL5, WWP1, AGO1, MSN, FBXO9, SAMD4A, TRIP12, HECTD1, TBL1XR1, SMAD7, CBL, SOCS4, UBR1, PSMB8, CLPX, SIRT2, ATM, RNF8, CTSK, RNF115, SPATA18, UCHL5, TNFAIP3, RNF111                                                                                                                                                    |
| *GO:0030163 | Protein catabolic process                           |              |                                                                                  | 33 | 6.74E-03 | RAD23B, UBES3A, KEAP1, AZIN1, CYLD, TNFRSF18, CUL5, LPCAT1, WWP1, NOS2, MSN, FBXO9, TRIP12, HECTD1, TBL1XR1, SMAD7, CBL, SOCS4, UBR1, PAG6, PSMB8, CLPX, SIRT2, RNF8, CTSK, RNF115, SPATA18, UCHL5, SH3D19, TNFAIP3, RNF111                                                                                                                                          |
|             |                                                     | *GO:0044257  | Cellular protein catabolic process                                               | 27 | 2.48E-02 | RAD23B, UBES3A, KEAP1, CYLD, CUL5, WWP1, MSN, FBXO9, TRIP12, HECTD1, TBL1XR1, SMAD7, CBL, SOCS4, UBR1, PSMB8, CLPX, SIRT2, RNF8, CTSK, RNF115, SPATA18, UCHL5, TNFAIP3, RNF111                                                                                                                                                                                       |
|             |                                                     | **GO:0005008 | Proteolysis                                                                      | 42 | 6.79E-02 | RAD23B, COPPS, UBES3A, KEAP1, ENPEP, CYLD, CUL5, APP, TNFRSF18, WWP1, KLKB1, CASP1, FBXO9, NPP5B, TRIP12, HECTD1, TBL1XR1, ANP32B, SMAD7, CBL, SOCS4, UBR1, PAG6, RBMX, SIRT2, CLPX, PSMB8, PROC, RNF1, CBLB, CTSK, RENBP, RNF115, DLD, UCHL5, SERPINEB1, SH3D19, HSPD1, TNFAIP3, RNF111                                                                             |
|             |                                                     | *GO:0051603  | Proteolysis involved in cellular protein catabolic process                       | 25 | 4.35E-02 | RAD23B, TBL1XR1, UBES3A, SMAD7, CBL, KEAP1, SOCS4, UBR1, CLPX, PSMB8, SIRT2, RNF8, CYLD, CUL5, CTSK, RNF115, WWP1, UCHL5, TNFAIP3, FBXO9, TRIP12, RNF111, HECTD1                                                                                                                                                                                                     |
|             |                                                     | *GO:0043632  | Modification-dependent macromolecule catabolic process                           | 21 | 7.44E-02 | RAD23B, TBL1XR1, SMAD7, UBES3A, CBL, KEAP1, SOCS4, UBR1, SIRT2, RNF8, CYLD, CUL5, RNF115, WWP1, UCHL5, TNFAIP3, FBXO9, TRIP12, HECTD1, RNF111                                                                                                                                                                                                                        |
|             |                                                     | *GO:0019941  | Modification-dependent protein catabolic process                                 | 21 | 6.52E-02 | RAD23B, TBL1XR1, SMAD7, UBES3A, CBL, KEAP1, SOCS4, UBR1, SIRT2, RNF8, CYLD, CUL5, RNF115, WWP1, UCHL5, TNFAIP3, FBXO9, TRIP12, HECTD1, RNF111                                                                                                                                                                                                                        |
|             |                                                     | *GO:0006511  | Ubiquitin-dependent protein catabolic process                                    | 21 | 5.43E-02 | RAD23B, TBL1XR1, SMAD7, UBES3A, CBL, KEAP1, SOCS4, UBR1, SIRT2, RNF8, CYLD, CUL5, RNF115, WWP1, UCHL5, TNFAIP3, FBXO9, TRIP12, HECTD1, RNF111                                                                                                                                                                                                                        |
|             |                                                     | *GO:0042787  | Protein ubiquitination involved in ubiquitin-dependent protein catabolic process | 9  | 2.41E-02 | CUL5, RNF115, UBES3A, WWP1, CBL, KEAP1, TRIP12, RNF111, HECTD1                                                                                                                                                                                                                                                                                                       |
| GO:0033554  | Cellular response to stress                         |              |                                                                                  | 49 | 6.02E-02 | MORF4L1, PHLP1, RAD23B, CPB2, NUA2, COPPS, SLC6A1, ASS1, TMX4, BCCIP, FOXO3, DTNBP1, NR2C2, PEA15, CDC45, TNFRSF18, APOA1, SERPINB10, CHD2, SLC22A3, TRIP12, PDK1, CCMK, NR2F2, POLG, CHST3, APTX, RAD52, ATM, RGS14, SIRT2, SOD2, ATRF, RNF8, EPHA4, DCLRE1A, EP300, KDM2A, FANCD2, HIPK3, SPATA18, EIF2S1, PARPBP, UCHL5, TNFAIP3, ZBTB1, TMC01, BMPR1A            |
| *GO:0071495 | Cellular response to endogenous stimulus            |              |                                                                                  | 30 | 7.42E-02 | CSF3, FGF7, SSH1, CPB2, ENPP1, UBES3A, DIAPH1, CPB2A, STAT5A, RPS6KB1, NEO1, NR3C1, CITED2, ACSL1, KDM3A, DNMT3A, KAT2B, SMAD7, SOCS1, ACACA, UBR1, SIRT2, PPP1R9B, EP300, PRLR, MED17, RAB14, RYR1, LHB, RNF111                                                                                                                                                     |
| *GO:0006974 | Cellular response to DNA damage stimulus            |              |                                                                                  | 25 | 7.17E-02 | MORF4L1, RAD23B, CCMK, POLG, APTX, BCCIP, FOXO3, RAD52, ATM, SOD2, RNF8, PEA15, DCLRE1A, CDC45, TNFRSF18, EP300, KDM2A, FANCD2, SPATA18, PARPBP, UCHL5, CHD2, ZBTB1, TRIP12                                                                                                                                                                                          |
| GO:0006952  | Defense response                                    |              |                                                                                  | 48 | 2.11E-03 | AMCF-II, MASP1, STAT5A, CXCL2, PTGS1, SYNCRIP, NFKBIA, CXCL8, RPS6KB1, TNFRSF4, CCL4, IL17D, TNFRSF18, TNFRSF11B, APOA1, IL4R, SERPINB10, NOS2, CASP1, FBXO9, FANCA, TNIP1, TRAF3, SELP, CEBPE, LY96, ELANE, SOCS1, SAA3, CH3L1, CHST3, LGALS8, FXR2, SIRT2, PROC, IFNAR1, EIF4G1, RPS6KA3, ETS1, FANCD2, EIF2S1, IRF1, RAB14, HSPD1, JAK3, TNFAIP3, ABL2, JAM3      |
| *GO:0006955 | Immune response                                     |              |                                                                                  | 40 | 1.24E-02 | AMCF-II, CSF3, ITGAL, MASP1, ENPP1, CXCL2, CD247, CXCL8, NFKBIA, SYNCRIP, TNFRSF4, CCL2B, CCL4, SLA-B, TNFRSF11B, TNFRSF18, APOA1, IL4R, NOS2, FBXO9, TNIP1, TRAF3, LY96, ELANE, SOCS1, L8, FOXP1, IFNAR1, RPS6KA3, TNFSF13B, IRF1, JAK3, HSPD1, CD79A, TNFAIP3, JAM3, ZBTB1, ABL2, BMPR1A                                                                           |
|             |                                                     | *GO:0002764  | Immune response-regulating signaling pathway                                     | 10 | 9.54E-02 | RPS6KA3, LY96, CD247, IRF1, NFKBIA, CD79A, HSPD1, TNFAIP3, TNIP1, TRAF3                                                                                                                                                                                                                                                                                              |
|             |                                                     | *GO:0002757  | Immune response-activating signal transduction                                   | 10 | 8.03E-02 | RPS6KA3, LY96, CD247, IRF1, NFKBIA, CD79A, HSPD1, TNFAIP3, TNIP1, TRAF3                                                                                                                                                                                                                                                                                              |
|             |                                                     | *GO:0002218  | Activation of innate immune response                                             | 8  | 2.07E-02 | RPS6KA3, LY96, IRF1, NFKBIA, HSPD1, TNFAIP3, TNIP1, TRAF3                                                                                                                                                                                                                                                                                                            |
|             |                                                     | *GO:0002758  | Innate immune response-activating signal transduction                            | 8  | 1.55E-02 | RPS6KA3, LY96, IRF1, NFKBIA, HSPD1, TNFAIP3, TNIP1, TRAF3                                                                                                                                                                                                                                                                                                            |
| *GO:0009719 | Response to endogenous stimulus                     |              |                                                                                  | 36 | 4.38E-02 | ME1, CSF3, FGF7, ENPP1, SSH1, CPB2, DIAPH1, UBES3A, CPB2A, STAT5A, NFKBIA, ABHD2, RPS6KB1, NEO1, NR3C1, CITED2, ACSL1, KDM3A, CASP1, DNMT3A, KAT2B, SMAD7, SOCS1, ACACA, UBR1, SIRT2, PPP1R9B, EP300, PRLR, MED17, RAB14, RYR1, TNFAIP3, LHB, RNF111, PPP2R2A                                                                                                        |
| *GO:0009628 | Response to abiotic stimulus                        |              |                                                                                  | 28 | 1.35E-02 | CPB2B, TRPV2, NFKBIA, DDHD2, APP, MAP3K2, CXCR4, NOS2, CASP1, DNAAJ4, PDK1, ELANE, CH3L1, PPP1CC, SIRT2, ATM, SOD2, RNF8, RHDH1, EP300, CCMK, GNAQ, FANCD2, EIF2S1, RYR1, IRF1, HSPD1, ZBTB1                                                                                                                                                                         |
|             |                                                     | *GO:0006979  | Response to oxidative stress                                                     | 16 | 3.54E-03 | PDK1, STX2, PTGS1, APTX, FOXO3, RAD52, GCLM, SIRT2, SOD2, GPX2, GPX1, APP, FANCD2, TXNRD1, TNFAIP3, NOD1                                                                                                                                                                                                                                                             |
|             |                                                     | *GO:0070482  | Response to oxygen levels                                                        | 9  | 8.28E-02 | PDK1, EP300, CPB2, CXCR4, RYR1, NOS2, CASP1, SIRT2, SOD2                                                                                                                                                                                                                                                                                                             |
| *GO:0006954 | Inflammatory response                               |              |                                                                                  | 21 | 3.53E-02 | AMCF-II, SELP, STAT5A, ELANE, CXCL2, PTGS1, CH3L1, SAA3, CXCL8, CCL4, TNFRSF4, PROC, IL1D, TNFRSF11B, TNFRSF18, APOA1, ETS1, LHB, NOS2, TNFAIP3, JAM3                                                                                                                                                                                                                |
| GO:2000026  | Regulation of multicellular organismal development  |              |                                                                                  | 48 | 3.87E-02 | PHLP1, CSF3, MTDH, SSH1, SAV1, TRPV2, STAT5A, NFKBIA, GPM6B, FOXO3, DDHD2, NR2F2, CITED2, APP, APOA1, IL4R, LE01, RAR8, GOLGA4, KDM5B, FANCA, LOC10621389, MYOC, KLF13, SMAD7, LDB1, CH3L1, TBR1, FOXP1, SIRT2, PROC, EIF4G1, SFRP5, HHEX, INHBA, EPHA4, PRLR, ETS1, FANCD2, IRF1, TFAP2A, CUX2, TNFAIP3, ZBTB1, ABL2, BMPR1A, CSN2                                  |
| GO:1903706  | Regulation of hemopoiesis                           |              |                                                                                  | 16 | 4.60E-03 | CSF3, KLF13, STAT5A, LDB1, NFKBIA, FOXO3, INHBA, ETS1, FANCD2, IL4R, IRF1, LE01, ZBTB1, FANCA, LOC10621389                                                                                                                                                                                                                                                           |
| *GO:1903708 | Positive regulation of hemopoiesis                  |              |                                                                                  | 8  | 8.09E-02 | CSF3, INHBA, ETS1, IL4R, STAT5A, FOXO3, ZBTB1                                                                                                                                                                                                                                                                                                                        |
| *GO:1903707 | Negative regulation of hemopoiesis                  |              |                                                                                  | 8  | 1.67E-02 | KLF13, IL4R, LDB1, STAT5A, IRF1, LE01, NFKBIA, LOC10621389                                                                                                                                                                                                                                                                                                           |
| *GO:0045637 | Regulation of myeloid cell differentiation          |              |                                                                                  | 11 | 8.80E-03 | CSF3, INHBA, ETS1, KLF13, LDB1, STAT5A, LE01, NFKBIA, FOXO3, LOC10621389                                                                                                                                                                                                                                                                                             |
| *GO:0045646 | Regulation of erythrocyte differentiation           |              |                                                                                  | 6  | 2.81E-03 | INHBA, ETS1, KLF13, LDB1, STAT5A, FOXO3                                                                                                                                                                                                                                                                                                                              |
| *GO:0045638 | Negative regulation of myeloid cell differentiation |              |                                                                                  | 6  | 2.20E-02 | KLF13, LDB1, STAT5A, LE01, NFKBIA, LOC10621389                                                                                                                                                                                                                                                                                                                       |
| *GO:0045647 | Negative regulation of erythrocyte differentiation  |              |                                                                                  | 3  | 2.74E-02 | KLF13, LDB1, STAT5A                                                                                                                                                                                                                                                                                                                                                  |
| *GO:0045589 | Regulation of regulatory T cell differentiation     |              |                                                                                  | 3  | 4.47E-02 | FANCD2, IRF1, FANCA                                                                                                                                                                                                                                                                                                                                                  |
| GO:0002682  | Regulation of immune system process                 |              |                                                                                  | 46 | 1.69E-04 | PHLP1, AMCF-II, CSF3, MASP1, STAT5A, CXCL2, CD247, NFKBIA, CXCL8, FOXO3, CCL2B, CCL4, AOP3, APOA1, IL4R, SERPINB10, LE01, MSN, FANCA, TNIP1, LOC10621389, TRAF3, SELP, SIT1, LY96, KLF13, LDB1, ELANE, SOCS1, CHST3, FXR2, FOXP1, INHBA, RPS6KA3, TNFSF13B, ETS1, FANCD2, EIF2S1, IRF1, JAK3, HSPD1, CD79A, TNFAIP3, JAM3, ZBTB1                                     |
| *GO:0002684 | Positive regulation of immune system process        |              |                                                                                  | 29 | 4.59E-03 | CSF3, AMCF-II, MASP1, STAT5A, CD247, CXCL2, CXCL8, NFKBIA, FOXO3, CCL4, AOP3, IL4R, TNIP1, TRAF3, SELP, LY96, ELANE, FOXP1, INHBA, RPS6KA3, TNFSF13B, ETS1, IRF1, JAK3, HSPD1, CD79A, TNFAIP3, ZBTB1                                                                                                                                                                 |
| *GO:0045088 | Regulation of innate immune response                |              |                                                                                  | 9  | 9.95E-02 | RPS6KA3, LY96, SOCS1, IRF1, NFKBIA, HSPD1, TNFAIP3, TNIP1, TRAF3                                                                                                                                                                                                                                                                                                     |
| *GO:0045089 | Positive regulation of innate immune response       |              |                                                                                  | 8  | 7.75E-02 | RPS6KA3, LY96, IRF1, NFKBIA, HSPD1, TNFAIP3, TNIP1, TRAF3                                                                                                                                                                                                                                                                                                            |
| *GO:0002685 | Regulation of leukocyte migration                   |              |                                                                                  | 8  | 9.16E-02 | AMCF-II, SELP, CXCL2, CXCL8, MSN, JAM3, CCL2B, CCL4                                                                                                                                                                                                                                                                                                                  |



|              |                                                                   |                                                                                              |                                                      |    |          |                                                                                                                                               |
|--------------|-------------------------------------------------------------------|----------------------------------------------------------------------------------------------|------------------------------------------------------|----|----------|-----------------------------------------------------------------------------------------------------------------------------------------------|
| *GO:0045137  | Development of primary sexual characteristics                     | *GO:0008406                                                                                  | Gonad development                                    | 10 | 1.69E-02 | CGA, INHBA, UBE3A, STAT5A, ARID5B, FOXO3, EIF2B2, FANCA, TBC1D20, CITED2                                                                      |
|              |                                                                   | *GO:0046545                                                                                  | Development of primary female sexual characteristics | 10 | 1.50E-02 | CGA, INHBA, UBE3A, STAT5A, ARID5B, FOXO3, EIF2B2, FANCA, TBC1D20, CITED2                                                                      |
|              |                                                                   |                                                                                              |                                                      | 7  | 1.21E-02 | INHBA, UBE3A, STAT5A, ARID5B, FOXO3, EIF2B2, FANCA                                                                                            |
|              |                                                                   | *GO:0008585                                                                                  | Female gonad development                             | 7  | 1.21E-02 | INHBA, UBE3A, STAT5A, ARID5B, FOXO3, EIF2B2, FANCA                                                                                            |
|              |                                                                   | *GO:0001541                                                                                  | Ovarian follicle development                         | 4  | 9.97E-02 | INHBA, UBE3A, FOXO3, EIF2B2                                                                                                                   |
|              | *GO:0046660                                                       | Female sex differentiation                                                                   |                                                      | 7  | 2.38E-02 | INHBA, UBE3A, STAT5A, ARID5B, FOXO3, EIF2B2, FANCA                                                                                            |
| GO:0030155   | Regulation of cell adhesion                                       |                                                                                              |                                                      | 21 | 3.53E-02 | SIT1, ASS1, SMAD7, LDB1, STAT5A, GPM6B, CCL28, CITED2, APOA1, TNFSF13B, PRLR, ETS1, FANCD2, IL4R, IRF1, HSPD1, JAK3, FANCA, ZBTB1, ABL2, MYOC |
| **GO:0045785 | Positive regulation of cell adhesion                              |                                                                                              |                                                      | 13 | 8.43E-02 | SMAD7, STAT5A, LDB1, CCL28, CITED2, APOA1, TNFSF13B, ETS1, IL4R, HSPD1, JAK3, ZBTB1, MYOC                                                     |
| *GO:0022407  | Regulation of cell-cell adhesion                                  |                                                                                              |                                                      | 16 | 1.21E-02 | SIT1, ASS1, SMAD7, STAT5A, CCL28, CITED2, APOA1, TNFSF13B, ETS1, FANCD2, IL4R, IRF1, HSPD1, JAK3, FANCA, ZBTB1                                |
|              | **GO:0022409                                                      | Positive regulation of cell-cell adhesion                                                    |                                                      | 9  | 9.95E-02 | TNFSF13B, ETS1, SMAD7, IL4R, STAT5A, JAK3, HSPD1, ZBTB1, CITED2                                                                               |
|              | *GO:1903037                                                       | Regulation of leukocyte cell-cell adhesion                                                   |                                                      | 13 | 2.30E-02 | SIT1, ASS1, STAT5A, CCL28, TNFSF13B, ETS1, FANCD2, IL4R, IRF1, HSPD1, JAK3, ZBTB1, FANCA                                                      |
| GO:0048589   | Developmental growth                                              |                                                                                              |                                                      | 20 | 7.08E-02 | CGA, TBL1XR1, UBE3A, ARID5B, STAT5A, TRPV2, SAV1, FOXO3, RAPH1, DDR2, FOXP1, ZFP361, HHEX, APP, PRLR, RARB, GOLGA4, KDM5B, BMPR1A, BCL9       |
| *GO:0035265  | Organ growth                                                      |                                                                                              |                                                      | 7  | 8.03E-02 | CGA, PRLR, UBE3A, SAV1, RARB, DDR2, FOXP1                                                                                                     |
| *GO:0043900  | Regulation of multi-organism process                              |                                                                                              |                                                      | 18 | 2.63E-02 | AMCF-II, CCNK, LY96, ELANE, PKN2, CHST3, FXR2, CCL4, SIRT2, INHBA, EP300, MDFIC, EIF251, SERPINB10, NOS2, TNFAIP3, TBC1D20, TRAF3             |
| *GO:0043903  | Regulation of symbiosis, encompassing mutation through parasitism |                                                                                              |                                                      | 13 | 6.64E-02 | AMCF-II, CCNK, EP300, MDFIC, EIF251, ELANE, SERPINB10, PKN2, CHST3, FXR2, CCL4, TBC1D20, TRAF3                                                |
|              | *GO:0051702                                                       | Interaction with symbiont                                                                    |                                                      | 6  | 1.64E-02 | AMCF-II, CCNK, EP300, ELANE, CCL4, TBC1D20                                                                                                    |
| *GO:0035821  | Modification of morphology or physiology of other organism        |                                                                                              |                                                      | 8  | 4.49E-03 | AMCF-II, CCNK, EP300, ELANE, NOS2, TNP1, CCL4, TBC1D20                                                                                        |
|              | *GO:0051817                                                       | Modification of morphology or physiology of other organism involved in symbiotic interaction |                                                      | 7  | 1.21E-02 | AMCF-II, CCNK, EP300, ELANE, TNP1, CCL4, TBC1D20                                                                                              |
|              | *GO:0044364                                                       | Disruption of cells of other organism                                                        |                                                      | 3  | 7.60E-02 | AMCF-II, ELANE, NOS2                                                                                                                          |
|              | *GO:0031640                                                       | Killing of cells of other organism                                                           |                                                      | 3  | 7.60E-02 | AMCF-II, ELANE, NOS2                                                                                                                          |
|              | *GO:0051851                                                       | Modification by host of symbiont morphology or physiology                                    |                                                      | 6  | 1.47E-02 | AMCF-II, CCNK, EP300, ELANE, CCL4, TBC1D20                                                                                                    |
|              | *GO:0043902                                                       | Positive regulation of multi-organism process                                                |                                                      | 8  | 6.47E-02 | INHBA, EP300, LY96, MDFIC, PKN2, NOS2, TBC1D20, SIRT2                                                                                         |
| GO:0048732   | Gland development                                                 |                                                                                              |                                                      | 17 | 1.20E-02 | CEBPA, CGA, UBE3A, ARID5B, STAT5A, SOD2, CITED2, HHEX, APOA1, PRLR, TGFA, MSN, TNFAIP3, ZBTB1, KDM5B, BMPR1A, CSN2                            |
| *GO:0001889  | Liver development                                                 |                                                                                              |                                                      | 6  | 2.20E-02 | CEBPA, HHEX, TGFA, TNFAIP3, CITED2, SOD2                                                                                                      |
| *GO:0003325  | Adrenal gland development                                         |                                                                                              |                                                      | 3  | 6.49E-02 | APOA1, ARID5B, CITED2                                                                                                                         |
| GO:0006914   | Autophagy                                                         |                                                                                              |                                                      | 17 | 7.09E-02 | SNAP29, PDK1, NRBF2, MTDH, SLC6A1, LGALS8, CHST3, FXR2, SIRT2, NR2C2, CTSK, SPATA18, EIF251, SERPINB10, SLC22A3, MCOLN1, PI4KA2A              |
| GO:0010876   | Lipid localization                                                |                                                                                              |                                                      | 14 | 1.88E-02 | ARV1, ENPP1, STAT5A, NFKBIA, ABCA3, ABCG8, INHBA, APOA1, ACSL1, NOS2, ACSL3, KDM5B, SLC27A2, CROT                                             |
| GO:0007517   | Muscle organ development                                          |                                                                                              |                                                      | 13 | 3.58E-02 | FAM65B, EP300, ACTA1, SMAD7, SAV1, ARID5B, CHD2, RYR1, SIRT2, FOXP1, MYOC, CITED2, BCL9                                                       |
| *GO:0005637  | Muscle tissue development                                         |                                                                                              |                                                      | 13 | 9.95E-02 | FAM65B, EP300, ACTA1, SMAD7, PLN, SAV1, RYR1, RARB, FOXP1, SIRT2, MYOC, CITED2, BCL9                                                          |
|              | *GO:0014706                                                       | Striated muscle tissue development                                                           |                                                      | 13 | 7.50E-02 | FAM65B, EP300, ACTA1, SMAD7, PLN, SAV1, RYR1, RARB, FOXP1, SIRT2, MYOC, CITED2, BCL9                                                          |
| GO:0045444   | Fat cell differentiation                                          |                                                                                              |                                                      | 12 | 7.04E-03 | CEBPA, TBL1XR1, EP300, ENPP1, SAV1, ARID5B, LRRC8C, SOCS1, FBXO9, PSM88, SIRT2, SOD2                                                          |
| GO:0031589   | Cell-substrate adhesion                                           |                                                                                              |                                                      | 12 | 5.67E-02 | ITGAL, APOA1, TMEM8B, SNED1, ITGB7, LDB1, GPM6B, JAM3, CCL28, WHAMM, MYOC, MUC4                                                               |
| *GO:0007160  | Cell-matrix adhesion                                              |                                                                                              |                                                      | 11 | 6.35E-03 | ITGAL, TMEM8B, SNED1, ITGB7, LDB1, GPM6B, JAM3, CCL28, WHAMM, MYOC, MUC4                                                                      |
| GO:0050878   | Regulation of body fluid levels                                   |                                                                                              |                                                      | 12 | 6.94E-02 | SELP, TLN1, STX2, PRLR, STAT5A, KLKB1, ENPP4, ADRA2B, DTNBP1, AQP3, CSN2, PROC                                                                |
| GO:0006790   | Sulfur compound metabolic process                                 |                                                                                              |                                                      | 11 | 9.09E-02 | PDK1, TPX1, ENPP1, CSGALNACT2, GDAP1, ACACA, CHST3, MAT2B, CHSY1, GCLM, SOD2                                                                  |
|              | *GO:0044272                                                       | Sulfur compound biosynthetic process                                                         |                                                      | 6  | 9.54E-02 | PDK1, CSGALNACT2, CHST3, MAT2B, CHSY1, GCLM                                                                                                   |
|              | *GO:0050650                                                       | Chondroitin sulfate proteoglycan biosynthetic process                                        |                                                      | 3  | 8.76E-02 | CSGALNACT2, CHST3, CHSY1                                                                                                                      |
| GO:0048511   | Rhythmic process                                                  |                                                                                              |                                                      | 10 | 7.47E-02 | PHLPP1, INHBA, EP300, GNAQ, UBE3A, STAT5A, FOXO3, NOS2, PPP1CC, EIF2B2                                                                        |
| GO:0048469   | Cell maturation                                                   |                                                                                              |                                                      | 9  | 4.33E-02 | CEBPA, APP, DLD, HBZ, ABHD2, FOXO3, PABPC1L, SIRT2, MYOC                                                                                      |
| GO:0046822   | Regulation of nucleocytoplasmic transport                         |                                                                                              |                                                      | 9  | 8.28E-02 | SFRP5, ANP32B, MDFIC, NFKBIA, KEAP1, PPP1CC, ZIC1, UHMK1, BMPR1A                                                                              |
| GO:0002221   | Pattern recognition receptor signaling pathway                    |                                                                                              |                                                      | 8  | 1.33E-02 | RPS6KA3, LY96, IRF1, NFKBIA, HSPD1, TNFAIP3, TNIP1, TRAF3                                                                                     |
|              | *GO:0002224                                                       | Toll-like receptor signaling pathway                                                         |                                                      | 8  | 4.04E-03 | RPS6KA3, LY96, IRF1, NFKBIA, HSPD1, TNFAIP3, TNIP1, TRAF3                                                                                     |
|              | *GO:0070427                                                       | Nucleotide-binding oligomerization domain containing 1 signaling pathway                     |                                                      | 2  | 7.57E-02 | NFKBIA, TNFAIP3                                                                                                                               |
| GO:0043491   | Protein kinase B signaling                                        |                                                                                              |                                                      | 8  | 4.56E-02 | PHLPP1, SFRP5, MTDH, CH3L1, PIK3R5, RPS6KB1, SIRT2, MYOC                                                                                      |
| GO:0034329   | Cell junction assembly                                            |                                                                                              |                                                      | 8  | 5.60E-02 | TLN1, SMAD7, LDB1, PKN2, GPM6B, RAB13, WHAMM, MYOC                                                                                            |
| *GO:0007044  | Cell-substrate junction assembly                                  |                                                                                              |                                                      | 5  | 5.31E-02 | TLN1, LDB1, GPM6B, WHAMM, MYOC                                                                                                                |
| GO:0001101   | Response to acid chemical                                         |                                                                                              |                                                      | 8  | 8.09E-02 | DNMT3A, CPEB4, SOCS1, FFAR1, GDAP1, UBR1, ABL2, AQP3                                                                                          |
| GO:0006575   | Cellular modified amino acid metabolic process                    |                                                                                              |                                                      | 7  | 6.92E-02 | CGA, CKM, ASS1, GDAP1, ALDH1L2, GCLM, SOD2                                                                                                    |
|              | *GO:0006474                                                       | N-terminal protein amino acid acetylation                                                    |                                                      | 3  | 8.78E-02 | KAT2B, EP300, NAA15                                                                                                                           |
| GO:0048017   | Inositol lipid-mediated signaling                                 |                                                                                              |                                                      | 7  | 8.03E-02 | SELP, UBE3A, CBL, PI4KA, PIK3R5, SIRT2, MYOC                                                                                                  |
|              | *GO:0048015                                                       | Phosphatidylinositol-mediated signaling                                                      |                                                      | 7  | 7.28E-02 | SELP, UBE3A, CBL, PI4KA, PIK3R5, SIRT2, MYOC                                                                                                  |
|              | *GO:0014955                                                       | Phosphatidylinositol 3-kinase signaling                                                      |                                                      | 6  | 6.82E-02 | SELP, UBE3A, CBL, PIK3R5, SIRT2, MYOC                                                                                                         |
| GO:0007050   | Cell cycle arrest                                                 |                                                                                              |                                                      | 7  | 7.28E-02 | INHBA, CCNK, CDKN1A, IRF1, CDKN3, P14ARF, UHMK1                                                                                               |
| GO:0098727   | Maintenance of cell number                                        |                                                                                              |                                                      | 7  | 8.43E-02 | FANCD2, LDB1, MED17, LEOT1, FOXO3, BCL9, BMPR1A                                                                                               |
| *GO:0015807  | Stem cell population maintenance                                  |                                                                                              |                                                      | 7  | 7.69E-02 | FANCD2, LDB1, MED17, LEOT1, FOXO3, BCL9, BMPR1A                                                                                               |
| GO:0061008   | Hepaticobiliary system development                                |                                                                                              |                                                      | 6  | 2.88E-02 | CEBPA, HHEX, TGFA, TNFAIP3, CITED2, SOD2                                                                                                      |
| GO:0006413   | Translational initiation                                          |                                                                                              |                                                      | 6  | 7.24E-02 | ABCF1, ABCE1, EIF251, RPS6KB1, DENR, UHMK1                                                                                                    |
| GO:0006081   | Cellular aldehyde metabolic process                               |                                                                                              |                                                      | 5  | 2.71E-02 | RDH11, TKT, SDR16C5, KDM3A, RPIA                                                                                                              |
| GO:0051781   | Positive regulation of cell division                              |                                                                                              |                                                      | 5  | 5.76E-02 | FGF7, PKN2, TGFA, IGFB, SIRT2                                                                                                                 |
| GO:0051899   | Membrane depolarization                                           |                                                                                              |                                                      | 5  | 6.72E-02 | SCN9B, CACSPER2, CASP1, GCLM, MYOC                                                                                                            |
| GO:1900181   | Negative regulation of protein localization to nucleus            |                                                                                              |                                                      | 5  | 9.46E-02 | SFRP5, MDFIC, DCLK3, NFKBIA, KEAP1                                                                                                            |
| GO:0048048   | Embryonic eye morphogenesis                                       |                                                                                              |                                                      | 4  | 4.54E-02 | TFAP2A, MFAP2, RARB, CITED2                                                                                                                   |
| *GO:0002089  | Lens morphogenesis in camera-type eye                             |                                                                                              |                                                      | 3  | 5.45E-02 | TDRD7, TBC1D20, CITED2                                                                                                                        |
| GO:2000348   | Regulation of CD40 signaling pathway                              |                                                                                              |                                                      | 3  | 1.38E-02 | FANCD2, TNFAIP3, FANCA                                                                                                                        |
| GO:0042026   | Protein refolding                                                 |                                                                                              |                                                      | 3  | 2.74E-02 | DNAJB1, HSPD1, DNAJAA                                                                                                                         |
| GO:0006656   | Phosphatidylcholine biosynthetic process                          |                                                                                              |                                                      | 3  | 6.49E-02 | APOA1, LPCAT1, ACSL3                                                                                                                          |
| *GO:2001245  | Regulation of phosphatidylcholine biosynthetic process            |                                                                                              |                                                      | 2  | 7.57E-02 | LPCAT1, ACSL3                                                                                                                                 |
| GO:0031629   | Synaptic vesicle fusion to presynaptic active zone membrane       |                                                                                              |                                                      | 3  | 9.97E-02 | SNAP29, STX1A, STX2                                                                                                                           |
| *subset      | **part of                                                         |                                                                                              |                                                      |    |          |                                                                                                                                               |

| Category   | GO - Cellular Component   | Gene numbers | p-value  | Genes                                                                                                                                                                                                                                                                                                                                                                                                                                                                                                                                                                                                                                                                                                                                                                                         |
|------------|---------------------------|--------------|----------|-----------------------------------------------------------------------------------------------------------------------------------------------------------------------------------------------------------------------------------------------------------------------------------------------------------------------------------------------------------------------------------------------------------------------------------------------------------------------------------------------------------------------------------------------------------------------------------------------------------------------------------------------------------------------------------------------------------------------------------------------------------------------------------------------|
| GO:0044421 | Extracellular region part | 109          | 7.48E-02 | MASP1, LTBP2, PTGS1, ENPEP, ALDH1L2, ST3GAL1, APP, APOA1, STAG4A, WWP1, ZNF445, NOS1, GNL3, POLG, FBP1, OLA1, ARPC1B, RENBP, RHCG, EIF2S1, SLC37A2, RAB1A, RYR1, MFAP2, RAB13, TNFAIP3, ANKFY1, VPS26A, PRPS2, AMCF-II, ITGAL, ASS1, ENPP1, ARPC5, COL4, IL17D, ITGB7, KLKB1, SLCOC1, PCF1, ACACA, LOC100154071, CH3L1, LGALS8, TKT, FXR2, RBMX, NOKAP1, LYVE1, DNAJB1, HSPD1, PABPC1L, LHB, TLN1, DDR2, GPX2, CXCR4, TGFA, SLC22A5, MSN, GOLGA4, LOC100153329, LOC100621389, SIT1, STX2, ANP32B, ARMD2, ACTA1, ELANE, SAK3, PI4KA, DEGR1, PROC, TAR5, INHBA, CTSK, CKM, CLIC5, GRN, CYBRD1, SERPINB1, TXNRD1, CUX2, JAM3, CSF3, CXCL2, ADAMTS15, CXCL8, EEZ1, ATP6V101, CCL28, APLP2, SERPINB10, CHD2, MYOC, ETFA, SELP, SLC12A2, IL9, IGFB, KLK1, PAG6, PYGM, SNED1, PYGL, HBZ, MAT2B, CSN2 |



|            |                                                            |    |          |                                                                                                                                                                                                                                                                                                                                                                                                                                                                                                                                                                                                                                                                                                |
|------------|------------------------------------------------------------|----|----------|------------------------------------------------------------------------------------------------------------------------------------------------------------------------------------------------------------------------------------------------------------------------------------------------------------------------------------------------------------------------------------------------------------------------------------------------------------------------------------------------------------------------------------------------------------------------------------------------------------------------------------------------------------------------------------------------|
| GO:0031988 | Membrane-bounded vesicle                                   | 95 | 4.84E-02 | TLN1, SEC24A, LTBP2, COP55, PTGS1, ENPEP, ALDH1L2, DDR2, ST3GAL1, GPX2, APP, APOA1, CXCR4, ST3GAL4, WWP1, SV2B, ZNF445, SLC22A5, MSN, NOD1, GOLGA4, LOC100153329, LOC100621389, SCAMP1, CLN3, STX1A, SIT1, STX2, ACTA1, ANP32B, POLG, ELANE, FBP1, PHKA, OLA1, DECR1, TAR5, ARPC1B, RENBP, KIF1B, RHCG, CLIC5, EF2S1, GRN, SLC37A2, DLD, RAB14, RYR1, CYBRD1, TXNRD1, RAB13, CUX2, TNFAIP3, ANKFY1, VPS26A, PRPS2, ITGAL, ASS1, EEA1, ABHD2, ATP6V1G1, ARPC5, CCL28, DTNBP1, APLP2, DDHD2, SYN1, KLKB1, ITGB7, CHD2, MYOC, ETFA, SLC04C1, SLC12A2, OPR1, CHIBL1, ACACA, LOC100154071, LGALS8, TKT, KLK1, FXR2, RBMX, ATM, NCKAP1, LYVE1, SNED1, PYGM, PYGL, HBZ, MAT2B, DNAJB1, HSPD1, PABPC1L |
| GO:0070062 | Extracellular exosome                                      | 80 | 5.05E-02 | TLN1, LTBP2, PTGS1, ENPEP, ALDH1L2, DDR2, ST3GAL1, GPX2, APP, APOA1, CXCR4, ST3GAL4, WWP1, ZNF445, MSN, SLC22A5, NOD1, GOLGA4, LOC100153329, LOC100621389, SIT1, STX2, ACTA1, ANP32B, POLG, ELANE, FBP1, PHKA, OLA1, DECR1, TAR5, ARPC1B, RENBP, RHCG, CLIC5, EIF2S1, GRN, SLC37A2, RAB14, CYBRD1, RYR1, TXNRD1, RAB13, CUX2, TNFAIP3, VPS26A, ANKFY1, PRPS2, ITGAL, ASS1, EEA1, ATP6V1G1, ARPC5, CCL28, APLP2, KLKB1, ITGB7, CHD2, MYOC, ETFA, SLC04C1, SLC12A2, CHIBL1, LOC100154071, ACACA, LGALS8, TKT, KLK1, FXR2, RBMX, NCKAP1, LYVE1, SNED1, PYGM, PYGL, HBZ, MAT2B, DNAJB1, HSPD1, PABPC1L                                                                                             |
| GO:1903561 | Extracellular vesicle                                      | 80 | 5.90E-02 | TLN1, LTBP2, PTGS1, ENPEP, ALDH1L2, DDR2, ST3GAL1, GPX2, APP, APOA1, CXCR4, ST3GAL4, WWP1, ZNF445, MSN, SLC22A5, NOD1, GOLGA4, LOC100153329, LOC100621389, SIT1, STX2, ACTA1, ANP32B, POLG, ELANE, FBP1, PHKA, OLA1, DECR1, TAR5, ARPC1B, RENBP, RHCG, CLIC5, EIF2S1, GRN, SLC37A2, RAB14, CYBRD1, RYR1, TXNRD1, RAB13, CUX2, TNFAIP3, VPS26A, ANKFY1, PRPS2, ITGAL, ASS1, EEA1, ATP6V1G1, ARPC5, CCL28, APLP2, KLKB1, ITGB7, CHD2, MYOC, ETFA, SLC04C1, SLC12A2, CHIBL1, LOC100154071, ACACA, LGALS8, TKT, KLK1, FXR2, RBMX, NCKAP1, LYVE1, SNED1, PYGM, PYGL, HBZ, MAT2B, DNAJB1, HSPD1, PABPC1L                                                                                             |
| GO:0043230 | Extracellular organelle                                    | 80 | 5.97E-02 | TLN1, LTBP2, PTGS1, ENPEP, ALDH1L2, DDR2, ST3GAL1, GPX2, APP, APOA1, CXCR4, ST3GAL4, WWP1, ZNF445, MSN, SLC22A5, NOD1, GOLGA4, LOC100153329, LOC100621389, SIT1, STX2, ACTA1, ANP32B, POLG, ELANE, FBP1, PHKA, OLA1, DECR1, TAR5, ARPC1B, RENBP, RHCG, CLIC5, EIF2S1, GRN, SLC37A2, RAB14, CYBRD1, RYR1, TXNRD1, RAB13, CUX2, TNFAIP3, VPS26A, ANKFY1, PRPS2, ITGAL, ASS1, EEA1, ATP6V1G1, ARPC5, CCL28, APLP2, KLKB1, ITGB7, CHD2, MYOC, ETFA, SLC04C1, SLC12A2, CHIBL1, LOC100154071, ACACA, LGALS8, TKT, KLK1, FXR2, RBMX, NCKAP1, LYVE1, SNED1, PYGM, PYGL, HBZ, MAT2B, DNAJB1, HSPD1, PABPC1L                                                                                             |
| GO:0005654 | Nucleoplasm                                                | 74 | 1.06E-02 | MORF4L1, ABCF1, COP55, CCNT1, RPS6KB1, FOXO3, ZIC1, SART3, CDC45, SMAP2, RARB, TNBP1, FANCA, GOLGA4, CHUK, GNL3, SCAMP1, TBL1XR1, CCNK, PKN2, RAI14, APTX, DECR1, PPP1CC, CLPX, CDKL5, RAB11FIP2, EP300, HIPK3, MED17, DLD, MCMBP, KPN47, FBXL4, TFAP2A, KPN45, KIAA1429, RAD23B, MTDH, SSH1, ZBTB11, HCF2, NR3C1, MYB2, NR2C2, SF3B1, ATXN2L, MAP3K2, CHD2, LEO1, KDM3A, TRIP12, CHD3, TAF2, DNMT3A, IKZF4, SELP, KAT2B, CEBPE, PCIF1, KANSL1, SMAD7, TAF5, TKT, RGS14, ATXN1, CBLB, PAPOLA, PP1G, ETS1, PARBP, NOP58, SH3D19, ZBTB1                                                                                                                                                          |
| GO:0097458 | Neuron part                                                | 32 | 3.40E-02 | SNAP29, CPEB2, SLC6A1, COP55, CPEB4, TRPV2, PTGS1, EEA1, DTNBP1, UHMK1, MBP, APP, TMEM57, SYN1, SV2B, MYOC, SCAMP1, CLN3, STX1A, STX2, OPR1, LGALS8, SIRT2, EPHA4, RDIH1, PPP1R9B, KIF1B, GNAQ, CLIC5, SYNM, RAB13                                                                                                                                                                                                                                                                                                                                                                                                                                                                             |
| GO:0043005 | Neuron projection                                          | 22 | 6.81E-02 | CLN3, STX1A, CPEB2, SLC6A1, OPR1, CPEB4, TRPV2, EEA1, PDYN, DTNBP1, RGS14, UHMK1, MBP, EPHA4, PPP1R9B, APP, KIF1B, TMEM57, SYN1, SV2B, RAB13, MYOC                                                                                                                                                                                                                                                                                                                                                                                                                                                                                                                                             |
| GO:0044454 | Nuclear chromosome part                                    | 20 | 5.06E-02 | MORF4L1, LOC100156127, DNMT3A, LDB1, LOC100158121, LOC100154071, APTX, PPP1CC, RBMX, CITED2, DCLRE1A, CDC45, SYN1, IRF1, MCMBP, UCHL5, SMARCA1, LOC100153329, LOC100621389                                                                                                                                                                                                                                                                                                                                                                                                                                                                                                                     |
| GO:0000228 | Nuclear chromosome                                         | 20 | 9.12E-02 | MORF4L1, LOC100156127, DNMT3A, LDB1, LOC100158121, LOC100154071, APTX, PPP1CC, RBMX, CITED2, DCLRE1A, CDC45, SYN1, IRF1, MCMBP, UCHL5, SMARCA1, LOC100153329, LOC100621389                                                                                                                                                                                                                                                                                                                                                                                                                                                                                                                     |
| GO:0000785 | Chromatin                                                  | 19 | 5.15E-02 | MORF4L1, LOC100156127, DNMT3A, LDB1, LOC100158121, LOC100154071, APTX, RBMX, CITED2, PARBP, IRF1, MCMBP, UCHL5, KDM3A, SMARCA1, LOC100153329, HELLS, LOC100621389                                                                                                                                                                                                                                                                                                                                                                                                                                                                                                                              |
| GO:0044431 | Golgi apparatus part                                       | 19 | 6.56E-02 | SCAMP1, CLN3, SLC35A5, CHST3, ARFIP1, WHAMM, SLC35A3, ST3GAL1, SAMD8, SLC35D1, ST3GAL4, IGF2R, ATP9A, CSGALNACT2, RAB14, CHSY1, RAB13, TBC1D20, TMC01                                                                                                                                                                                                                                                                                                                                                                                                                                                                                                                                          |
| GO:0000790 | Nuclear chromatin                                          | 15 | 1.94E-02 | MORF4L1, LOC100156127, DNMT3A, LDB1, LOC100158121, LOC100154071, APTX, RBMX, CITED2, IRF1, MCMBP, UCHL5, SMARCA1, LOC100153329                                                                                                                                                                                                                                                                                                                                                                                                                                                                                                                                                                 |
| GO:0000139 | Golgi membrane                                             | 14 | 3.30E-02 | SLC35A5, CHST3, ARFIP1, WHAMM, SLC35A3, SAMD8, ST3GAL1, SLC35D1, ST3GAL4, CSGALNACT2, RAB14, CHSY1, TBC1D20, TMC01                                                                                                                                                                                                                                                                                                                                                                                                                                                                                                                                                                             |
| GO:0030424 | Axon                                                       | 13 | 2.42E-02 | EPHA4, APP, KIF1B, TMEM57, SYN1, SLC6A1, TRPV2, EEA1, PDYN, DTNBP1, MYOC, UHMK1, MBP                                                                                                                                                                                                                                                                                                                                                                                                                                                                                                                                                                                                           |
| GO:0005769 | Early endosome                                             | 12 | 7.50E-03 | TBC1D16, EPHA4, CLN3, MLC1, CXCR4, RUSC1, ATP9A, RAB14, EEA1, HSPD1, ANKFY1, VPS26A                                                                                                                                                                                                                                                                                                                                                                                                                                                                                                                                                                                                            |
| GO:0030133 | Transport vesicle                                          | 11 | 5.62E-02 | SCAMP1, DDHD2, CLN3, APP, STX1A, SEC24A, SYN1, STX2, COP55, SV2B, DTNBP1                                                                                                                                                                                                                                                                                                                                                                                                                                                                                                                                                                                                                       |
| GO:0031984 | Organelle subcompartment                                   | 11 | 5.62E-02 | SCAMP1, ST3GAL1, CLN3, ARV1, IGF2R, ATP9A, CSGALNACT2, RAB14, CHSY1, ARFIP1, RAB13                                                                                                                                                                                                                                                                                                                                                                                                                                                                                                                                                                                                             |
| GO:0098791 | Golgi subcompartment                                       | 10 | 8.43E-02 | SCAMP1, ST3GAL1, CLN3, IGF2R, ATP9A, CSGALNACT2, RAB14, CHSY1, ARFIP1, RAB13                                                                                                                                                                                                                                                                                                                                                                                                                                                                                                                                                                                                                   |
| GO:0043209 | Myelin sheath                                              | 10 | 8.75E-02 | SYN1, DLD, ATP5O, TKT, MSN, HSPD1, JAM3, SIRT2, MBP, SOD2                                                                                                                                                                                                                                                                                                                                                                                                                                                                                                                                                                                                                                      |
| GO:0008021 | Synaptic vesicle                                           | 8  | 1.21E-02 | SCAMP1, CLN3, STX1A, SYN1, STX2, COP55, SV2B, DTNBP1                                                                                                                                                                                                                                                                                                                                                                                                                                                                                                                                                                                                                                           |
| GO:0070382 | Exocytic vesicle                                           | 8  | 3.23E-02 | SCAMP1, CLN3, STX1A, SYN1, STX2, COP55, SV2B, DTNBP1                                                                                                                                                                                                                                                                                                                                                                                                                                                                                                                                                                                                                                           |
| GO:0033267 | Axon part                                                  | 7  | 4.41E-02 | KIF1B, TRPV2, EEA1, PDYN, DTNBP1, MYOC, MBP                                                                                                                                                                                                                                                                                                                                                                                                                                                                                                                                                                                                                                                    |
| GO:0030658 | Transport vesicle membrane                                 | 6  | 4.53E-02 | SCAMP1, STX1A, SEC24A, SYN1, SV2B, DTNBP1                                                                                                                                                                                                                                                                                                                                                                                                                                                                                                                                                                                                                                                      |
| GO:0099572 | Postsynaptic specialization                                | 5  | 2.17E-02 | PPP1R9B, SYN1, CPEB4, DTNBP1, RGS14                                                                                                                                                                                                                                                                                                                                                                                                                                                                                                                                                                                                                                                            |
| GO:0014069 | Postsynaptic density                                       | 5  | 2.17E-02 | PPP1R9B, SYN1, CPEB4, DTNBP1, RGS14                                                                                                                                                                                                                                                                                                                                                                                                                                                                                                                                                                                                                                                            |
| GO:0030672 | Synaptic vesicle membrane                                  | 5  | 2.76E-02 | SCAMP1, STX1A, SYN1, SV2B, DTNBP1                                                                                                                                                                                                                                                                                                                                                                                                                                                                                                                                                                                                                                                              |
| GO:0090501 | Exocytic vesicle membrane                                  | 5  | 2.78E-02 | SCAMP1, STX1A, SYN1, SV2B, DTNBP1                                                                                                                                                                                                                                                                                                                                                                                                                                                                                                                                                                                                                                                              |
| GO:0060076 | Excitatory synapse                                         | 5  | 4.29E-02 | PPP1R9B, SYN1, CPEB4, DTNBP1, RGS14                                                                                                                                                                                                                                                                                                                                                                                                                                                                                                                                                                                                                                                            |
| GO:0000307 | Cyclin-dependent protein kinase holoenzyme complex         | 4  | 6.20E-02 | CCNK, CCNT1, BCCIP, HSPD1                                                                                                                                                                                                                                                                                                                                                                                                                                                                                                                                                                                                                                                                      |
| GO:0044309 | Neuron spine                                               | 4  | 6.20E-02 | APP, EEA1, DTNBP1, RGS14                                                                                                                                                                                                                                                                                                                                                                                                                                                                                                                                                                                                                                                                       |
| GO:0043218 | Compact myelin                                             | 3  | 5.17E-02 | JAM3, SIRT2, MBP                                                                                                                                                                                                                                                                                                                                                                                                                                                                                                                                                                                                                                                                               |
| GO:0019208 | Nuclear cyclin-dependent protein kinase holoenzyme complex | 3  | 5.17E-02 | CCNT1, BCCIP, HSPD1                                                                                                                                                                                                                                                                                                                                                                                                                                                                                                                                                                                                                                                                            |

| Category               |                                             | Gene numbers | p-value  | Genes                                                                                                                                                                                                                                                                                                                                                                                           |
|------------------------|---------------------------------------------|--------------|----------|-------------------------------------------------------------------------------------------------------------------------------------------------------------------------------------------------------------------------------------------------------------------------------------------------------------------------------------------------------------------------------------------------|
| GO - Molecular Process |                                             |              |          |                                                                                                                                                                                                                                                                                                                                                                                                 |
| GO:0005524             | ATP binding                                 | 55           | 6.70E-03 | ABCF1, NUAK2, RPS6KB1, DDR2, TPK1, CSNK2A2, EEF2K, EF2B2, INSR, CHUK, ABCE1, ACTA1, PKN2, OLA1, COT6A, CLPX, CDKL5, TAR5, KIF1B, CKM, NAV2, HIPK3, ATP9A, LOC102162987, SMARCA1, ENPP1, ASS1, VARS, ABCA3, UHMK1, CHD8, DD46, SYN1, SNRK, MAP3K2, DCLK3, CHD2, IKZF1A, LOC780419, DNAJA4, HELLS, CHD3, ACACA, ATM, ABCG8, EPHA4, RPS6KA3, PYGL, HSPD1, JAK3, PIP4K2A, ABL2, MYLK, GFRA2, BMPR1A |
| GO:0003677             | DNA binding                                 | 28           | 2.76E-02 | ZFAND5, SSH1, STAT5A, LOC100158121, NR3C1, LOC100627422, KDM1B, CHD8, APP, HNRNP, RARB, KDM5B, LOC100153329, LOC100621389, CHD3, LOC100156127, DNMT3A, CEBPB, AFR2, POLG, LOC100154071, APTX, RAD52, ATM, KDM2A, SMARCA1, TNFAIP3                                                                                                                                                               |
| GO:0003682             | Chromatin binding                           | 20           | 1.83E-03 | MORF4L1, TAF2, DNMT3A, BRD2, KAT2B, POLG, LDB1, CCNT1, TLE4, APTX, RBMX, FOXD1, SIRT2, CITED2, RNH8, TFAM, HHEX, CDC45, MCMBP, HELLS                                                                                                                                                                                                                                                            |
| GO:0004674             | Protein serine/threonine kinase activity    | 13           | 4.63E-02 | NUAK2, PKN2, RPS6KB1, UHMK1, ATM, CSNK2A2, RPS6KA3, SNRK, HIPK3, EEF2K, DCLK3, GFRA2, MYLK                                                                                                                                                                                                                                                                                                      |
| GO:0004842             | Ubiquitin-protein transferase activity      | 11           | 1.82E-02 | RNF8, CBLB, UBE3A, UBR5, WWP1, FBXL4, KEAP1, TNFAIP3, TRIP12, TRAF3, HECTD1                                                                                                                                                                                                                                                                                                                     |
| GO:0003713             | Transcription coactivator activity          | 10           | 1.29E-02 | CEBPA, KAT2B, EP300, MTDH, UBE3A, ARID5B, MED17, TFAP2A, MYCBP, MYOC                                                                                                                                                                                                                                                                                                                            |
| GO:0016887             | ATPase activity                             | 9            | 7.75E-03 | ABCG8, ABCF1, ABCE1, KIF1B, OLA1, KIF21A, SMARCA1, ABCA3, ATP9                                                                                                                                                                                                                                                                                                                                  |
| GO:0044212             | Transcription regulatory region DNA binding | 9            | 2.63E-02 | TAF2, IKZF4, TBL1XR1, SMAD7, TAF5, ARID5B, KLF11, CCNT1, MYBL2                                                                                                                                                                                                                                                                                                                                  |
| GO:0016874             | Ligase activity                             | 7            | 5.30E-03 | RNF8, CBLB, UBE3A, UBR5, WWP1, TRIP12, HECTD1                                                                                                                                                                                                                                                                                                                                                   |
| GO:0043022             | Ribosome binding                            | 6            | 8.34E-03 | ABCF1, CPEB2, EIF2S1, CPEB4, NAA15, OLA1                                                                                                                                                                                                                                                                                                                                                        |
| GO:0008083             | Growth factor activity                      | 6            | 4.37E-02 | CSF3, INHBA, FGF7, TGFA, IGF2                                                                                                                                                                                                                                                                                                                                                                   |

|            |                                                        |   |          |                                       |
|------------|--------------------------------------------------------|---|----------|---------------------------------------|
| GO:0050660 | Flavin adenine dinucleotide binding                    | 6 | 6.96E-02 | KDM1B, AIFM2, DLD, TXNRP1, NOS2, ETFA |
| GO:0001047 | Core promoter binding                                  | 5 | 4.54E-02 | KANSL1, AGO1, KDM3A, FOXO3, RBMX      |
| GO:0003725 | Double-stranded RNA binding                            | 5 | 6.83E-02 | MITD1, AGO1, APTX, MSN, HSPD1         |
| GO:0000030 | Mannosyltransferase activity                           | 3 | 3.61E-02 | PIGV, DPY19L4, ALG12                  |
| GO:0044467 | Long-chain fatty acid-CoA ligase activity              | 3 | 6.56E-02 | ACSL1, SLC27A2, ACSL3                 |
| GO:0008307 | Structural constituent of muscle                       | 3 | 8.85E-02 | PDLIM3, SYNM, TPM1                    |
| GO:0006184 | Glycogen phosphorylase activity                        | 2 | 7.62E-02 | PYGM, PYGL                            |
| GO:0005130 | Granulocyte colony-stimulating factor receptor binding | 2 | 7.62E-02 | CSF3                                  |
