# Supplementary material for: Transcriptomic Analysis of Porcine Endometrium during Implantation after In Vitro Stimulation by Adiponectin
Source: MDPI journal article supplement (doi:10.3390/ijms20061335), 2019-03-16
Supplement: s1 [file s1]

## Supplementary Table 5

Complete list of gene interactions

| Gene 1 | Gene 2  | Weight | Network type    | Networks               |
|--------|---------|--------|-----------------|------------------------|
| PRLR   | LHB     | 0,0203 | Co-expression   | Mallon-McKay-2013      |
| HSD3B1 | LHB     | 0,0119 | Co-expression   | Mallon-McKay-2013      |
| HSD3B1 | PRLR    | 0,0148 | Co-expression   | Mallon-McKay-2013      |
| CGA    | LHB     | 0,0189 | Co-expression   | Mallon-McKay-2013      |
| CGA    | PRLR    | 0,0205 | Co-expression   | Mallon-McKay-2013      |
| CGA    | HSD3B1  | 0,0131 | Co-expression   | Mallon-McKay-2013      |
| CGB3   | LHB     | 0,0273 | Co-expression   | Mallon-McKay-2013      |
| CGB3   | CGA     | 0,0216 | Co-expression   | Mallon-McKay-2013      |
| FSHB   | LHCGR   | 0,0139 | Co-expression   | Mallon-McKay-2013      |
| HSD3B2 | LHB     | 0,0165 | Co-expression   | Mallon-McKay-2013      |
| HSD3B2 | HSD3B1  | 0,0113 | Co-expression   | Mallon-McKay-2013      |
| ICAM5  | ESM1    | 0,0131 | Co-expression   | Mallon-McKay-2013      |
| TGFA   | MUC4    | 0,0063 | Co-expression   | Wang-Maris-2006        |
| PRLR   | TGFA    | 0,0072 | Co-expression   | Wang-Maris-2006        |
| IL1B   | CXCL8   | 0,0205 | Co-expression   | Wang-Maris-2006        |
| ICAM5  | TGFA    | 0,0047 | Co-expression   | Wang-Maris-2006        |
| ICAM5  | PTGS1   | 0,0103 | Co-expression   | Wang-Maris-2006        |
| PRL    | PRLR    | 0,0115 | Co-expression   | Wang-Maris-2006        |
| LHB    | MUC4    | 0,0045 | Co-expression   | Innocenti-Brown-2011   |
| IL1B   | FGF7    | 0,0133 | Co-expression   | Innocenti-Brown-2011   |
| IL1B   | CXCL8   | 0,0094 | Co-expression   | Innocenti-Brown-2011   |
| TSHB   | LHB     | 0,0038 | Co-expression   | Innocenti-Brown-2011   |
| IL1B   | CXCL8   | 0,0269 | Co-expression   | den Boon-Ahlquist-2015 |
| CSRP2  | HSD17B8 | 0,0124 | Co-expression   | den Boon-Ahlquist-2015 |
| ICAM5  | CGA     | 0,0125 | Co-expression   | den Boon-Ahlquist-2015 |
| TSHR   | LHCGR   | 0,0142 | Co-expression   | den Boon-Ahlquist-2015 |
| IL1B   | PTGS1   | 0,0200 | Co-expression   | Alizadeh-Staudt-2000   |
| ENPP1  | INSR    | 0,0225 | Co-expression   | Alizadeh-Staudt-2000   |
| CXCL8  | TGFA    | 0,0212 | Co-expression   | Wang-Cheung-2015       |
| IL1B   | TGFA    | 0,0116 | Co-expression   | Dobbin-Giordano-2005   |
| IL1B   | CXCL8   | 0,0111 | Co-expression   | Dobbin-Giordano-2005   |
| ICAM5  | HSD3B1  | 0,0129 | Co-expression   | Dobbin-Giordano-2005   |
| ICAM5  | FSHB    | 0,0184 | Co-expression   | Dobbin-Giordano-2005   |
| PRL    | PRLR    | 0,0166 | Co-expression   | Dobbin-Giordano-2005   |
| INHA   | HSD3B2  | 0,0035 | Co-expression   | Dobbin-Giordano-2005   |
| IL1B   | CXCL8   | 0,0224 | Co-expression   | Bild-Nevins-2006 B     |
| LHCGR  | FGF7    | 0,0272 | Co-expression   | Bild-Nevins-2006 B     |
| FSHB   | MUC4    | 0,0072 | Co-expression   | Bild-Nevins-2006 B     |
| HSD3B2 | HSD3B1  | 0,0129 | Co-expression   | Bild-Nevins-2006 B     |
| ICAM5  | TGFA    | 0,0111 | Co-expression   | Bild-Nevins-2006 B     |
| PRL    | ICAM5   | 0,0057 | Co-expression   | Bild-Nevins-2006 B     |
| INHA   | MUC4    | 0,0219 | Co-expression   | Bild-Nevins-2006 B     |
| PRLR   | TGFA    | 0,0105 | Co-expression   | Ramaswamy-Golub-2001   |
| IL1B   | CXCL8   | 0,0096 | Co-expression   | Ramaswamy-Golub-2001   |
| FSHB   | TGFA    | 0,0076 | Co-expression   | Ramaswamy-Golub-2001   |
| CSRP2  | INSR    | 0,0210 | Co-expression   | Ramaswamy-Golub-2001   |
| TSHR   | FSHB    | 0,0085 | Co-expression   | Ramaswamy-Golub-2001   |
| IL1B   | CXCL8   | 0,0175 | Co-expression   | Bonome-Birrer-2008     |
| MAP3K3 | INSR    | 0,0206 | Co-expression   | Bonome-Birrer-2008     |
| TSHB   | TGFA    | 0,0067 | Co-expression   | Bonome-Birrer-2008     |
| HSD3B2 | TSHB    | 0,0051 | Co-expression   | Bonome-Birrer-2008     |
| ENPP1  | LHCGR   | 0,0148 | Co-expression   | Bonome-Birrer-2008     |
| PRL    | CGA     | 0,0020 | Co-expression   | Bonome-Birrer-2008     |
| IL1B   | CXCL8   | 0,0114 | Co-expression   | Boldrick-Relman-2002   |
| IL1B   | CXCL8   | 0,0092 | Co-expression   | Noble-Diehl-2008       |
| HSD3B2 | HSD3B1  | 0,0335 | Co-expression   | Noble-Diehl-2008       |
| INHA   | CGA     | 0,0172 | Co-expression   | Noble-Diehl-2008       |
| PRLR   | LHB     | 0,0177 | Co-localization | Schadt-Shoemaker-2004  |
| HSD3B1 | LHB     | 0,0219 | Co-localization | Schadt-Shoemaker-2004  |
| HSD3B1 | PRLR    | 0,0208 | Co-localization | Schadt-Shoemaker-2004  |
| INSR   | LHB     | 0,0158 | Co-localization | Schadt-Shoemaker-2004  |

|         |        |        |                       |                          |
|---------|--------|--------|-----------------------|--------------------------|
| INSR    | PRLR   | 0,0243 | Co-localization       | Schadt-Shoemaker-2004    |
| INSR    | HSD3B1 | 0,0149 | Co-localization       | Schadt-Shoemaker-2004    |
| CGA     | LHB    | 0,0220 | Co-localization       | Schadt-Shoemaker-2004    |
| IL1B    | CXCL8  | 0,0187 | Co-localization       | Schadt-Shoemaker-2004    |
| PTGIS   | PTGS1  | 0,0119 | Co-localization       | Schadt-Shoemaker-2004    |
| CSRP2   | LHB    | 0,0344 | Co-localization       | Schadt-Shoemaker-2004    |
| CSRP2   | PRLR   | 0,0216 | Co-localization       | Schadt-Shoemaker-2004    |
| CSRP2   | HSD3B1 | 0,0231 | Co-localization       | Schadt-Shoemaker-2004    |
| CSRP2   | INSR   | 0,0215 | Co-localization       | Schadt-Shoemaker-2004    |
| HSD3B2  | LHB    | 0,0143 | Co-localization       | Schadt-Shoemaker-2004    |
| HSD3B2  | PRLR   | 0,0183 | Co-localization       | Schadt-Shoemaker-2004    |
| HSD3B2  | HSD3B1 | 0,0337 | Co-localization       | Schadt-Shoemaker-2004    |
| HSD3B2  | LHCGR  | 0,0206 | Co-localization       | Schadt-Shoemaker-2004    |
| HSD3B2  | CSRP2  | 0,0157 | Co-localization       | Schadt-Shoemaker-2004    |
| CDKN1C  | LHB    | 0,0200 | Co-localization       | Schadt-Shoemaker-2004    |
| CDKN1C  | PRLR   | 0,0220 | Co-localization       | Schadt-Shoemaker-2004    |
| CDKN1C  | HSD3B1 | 0,0234 | Co-localization       | Schadt-Shoemaker-2004    |
| CDKN1C  | INSR   | 0,0205 | Co-localization       | Schadt-Shoemaker-2004    |
| CDKN1C  | CSRP2  | 0,0246 | Co-localization       | Schadt-Shoemaker-2004    |
| CDKN1C  | HSD3B2 | 0,0184 | Co-localization       | Schadt-Shoemaker-2004    |
| PRL     | LHB    | 0,0248 | Co-localization       | Schadt-Shoemaker-2004    |
| PRLR    | LHB    | 0,0095 | Co-localization       | Johnson-Shoemaker-2003   |
| CGA     | LHB    | 0,0046 | Co-localization       | Johnson-Shoemaker-2003   |
| CGA     | PRLR   | 0,0096 | Co-localization       | Johnson-Shoemaker-2003   |
| IL1B    | CXCL8  | 0,0141 | Co-localization       | Johnson-Shoemaker-2003   |
| PTGIS   | FGF7   | 0,0108 | Co-localization       | Johnson-Shoemaker-2003   |
| PTGIS   | PTGS1  | 0,0201 | Co-localization       | Johnson-Shoemaker-2003   |
| HSD3B2  | HSD3B1 | 0,01   | Co-localization       | Johnson-Shoemaker-2003   |
| HSD3B2  | LHCGR  | 0,01   | Co-localization       | Johnson-Shoemaker-2003   |
| ENPP1   | INSR   | 0,02   | Co-localization       | Johnson-Shoemaker-2003   |
| CDKN1C  | LHB    | 0,00   | Co-localization       | Johnson-Shoemaker-2003   |
| CDKN1C  | PRLR   | 0,02   | Co-localization       | Johnson-Shoemaker-2003   |
| CDKN1C  | HSD3B1 | 0,01   | Co-localization       | Johnson-Shoemaker-2003   |
| CDKN1C  | CGA    | 0,00   | Co-localization       | Johnson-Shoemaker-2003   |
| INHA    | LHCGR  | 0,02   | Co-localization       | Johnson-Shoemaker-2003   |
| INHA    | HSD3B2 | 0,01   | Co-localization       | Johnson-Shoemaker-2003   |
| INHA    | ICAM5  | 0,02   | Co-localization       | Johnson-Shoemaker-2003   |
| CGA     | LHB    | 0,20   | Pathway               | REACTOME                 |
| LHCGR   | LHB    | 0,67   | Pathway               | REACTOME                 |
| LHCGR   | CGA    | 0,20   | Pathway               | REACTOME                 |
| CGB3    | CGA    | 0,41   | Pathway               | REACTOME                 |
| MAP3K3  | IL1B   | 0,61   | Pathway               | REACTOME                 |
| TSHB    | CGA    | 0,20   | Pathway               | REACTOME                 |
| FSHB    | CGA    | 0,14   | Pathway               | REACTOME                 |
| SQSTM1  | IL1B   | 0,32   | Pathway               | REACTOME                 |
| SQSTM1  | MAP3K3 | 0,3192 | Pathway               | REACTOME                 |
| INHA    | CGA    | 0,2148 | Pathway               | REACTOME                 |
| INHA    | FSHB   | 0,4981 | Pathway               | REACTOME                 |
| TSHR    | CGA    | 0,2012 | Pathway               | REACTOME                 |
| TSHR    | TSHB   | 0,6667 | Pathway               | REACTOME                 |
| CGA     | LHB    | 0,0670 | Pathway               | Wu-Stein-2010            |
| LHCGR   | LHB    | 0,0986 | Pathway               | Wu-Stein-2010            |
| LHCGR   | CGA    | 0,0562 | Pathway               | Wu-Stein-2010            |
| TSHB    | CGA    | 0,0677 | Pathway               | Wu-Stein-2010            |
| FSHB    | CGA    | 0,0699 | Pathway               | Wu-Stein-2010            |
| PRL     | PRLR   | 0,2205 | Pathway               | Wu-Stein-2010            |
| TSHR    | CGA    | 0,0691 | Pathway               | Wu-Stein-2010            |
| TSHR    | TSHB   | 0,1225 | Pathway               | Wu-Stein-2010            |
| CGA     | LHB    | 0,2685 | Physical Interactions | IREF-SMALL-SCALE-STUDIES |
| GALNT11 | MUC4   | 0,9501 | Physical Interactions | IREF-SMALL-SCALE-STUDIES |
| LHCGR   | LHB    | 0,1999 | Physical Interactions | IREF-SMALL-SCALE-STUDIES |
| LHCGR   | CGA    | 0,1059 | Physical Interactions | IREF-SMALL-SCALE-STUDIES |
| CGB3    | CGA    | 0,2539 | Physical Interactions | IREF-SMALL-SCALE-STUDIES |
| CGB3    | LHCGR  | 0,1890 | Physical Interactions | IREF-SMALL-SCALE-STUDIES |
| TSHB    | CGA    | 0,4054 | Physical Interactions | IREF-SMALL-SCALE-STUDIES |

|         |        |        |                        |                          |
|---------|--------|--------|------------------------|--------------------------|
| RHBDF1  | TGFA   | 0,3434 | Physical Interactions  | IREF-SMALL-SCALE-STUDIES |
| FSHB    | CGA    | 0,2613 | Physical Interactions  | IREF-SMALL-SCALE-STUDIES |
| FSHB    | CGB3   | 0,4662 | Physical Interactions  | IREF-SMALL-SCALE-STUDIES |
| PTGIS   | PTGS1  | 0,5032 | Physical Interactions  | IREF-SMALL-SCALE-STUDIES |
| SQSTM1  | MAP3K3 | 0,0103 | Physical Interactions  | IREF-SMALL-SCALE-STUDIES |
| NUCB1   | PTGS1  | 0,2234 | Physical Interactions  | IREF-SMALL-SCALE-STUDIES |
| NKD2    | TGFA   | 0,1518 | Physical Interactions  | IREF-SMALL-SCALE-STUDIES |
| ESM1    | ITGAL  | 0,4143 | Physical Interactions  | IREF-SMALL-SCALE-STUDIES |
| ENPP1   | INSR   | 0,2397 | Physical Interactions  | IREF-SMALL-SCALE-STUDIES |
| ICAM5   | ITGAL  | 0,2410 | Physical Interactions  | IREF-SMALL-SCALE-STUDIES |
| PRL     | PRLR   | 0,1281 | Physical Interactions  | IREF-SMALL-SCALE-STUDIES |
| TSHR    | LHCGR  | 0,0623 | Physical Interactions  | IREF-SMALL-SCALE-STUDIES |
| TSHR    | TSHB   | 0,2385 | Physical Interactions  | IREF-SMALL-SCALE-STUDIES |
| CGA     | LHB    | 0,2457 | Physical Interactions  | IREF-HPRD                |
| GALNT11 | MUC4   | 0,9335 | Physical Interactions  | IREF-HPRD                |
| LHCGR   | LHB    | 0,2058 | Physical Interactions  | IREF-HPRD                |
| LHCGR   | CGA    | 0,1065 | Physical Interactions  | IREF-HPRD                |
| CGB3    | CGA    | 0,2403 | Physical Interactions  | IREF-HPRD                |
| CGB3    | LHCGR  | 0,2013 | Physical Interactions  | IREF-HPRD                |
| TSHB    | CGA    | 0,3867 | Physical Interactions  | IREF-HPRD                |
| RHBDF1  | TGFA   | 0,4550 | Physical Interactions  | IREF-HPRD                |
| FSHB    | CGA    | 0,2468 | Physical Interactions  | IREF-HPRD                |
| FSHB    | CGB3   | 0,4664 | Physical Interactions  | IREF-HPRD                |
| NUCB1   | PTGS1  | 0,5983 | Physical Interactions  | IREF-HPRD                |
| NKD2    | TGFA   | 0,4550 | Physical Interactions  | IREF-HPRD                |
| ENPP1   | INSR   | 0,2547 | Physical Interactions  | IREF-HPRD                |
| ICAM5   | ITGAL  | 0,4619 | Physical Interactions  | IREF-HPRD                |
| PRL     | PRLR   | 0,2462 | Physical Interactions  | IREF-HPRD                |
| TSHR    | LHCGR  | 0,0694 | Physical Interactions  | IREF-HPRD                |
| TSHR    | TSHB   | 0,2519 | Physical Interactions  | IREF-HPRD                |
| TGFA    | MUC4   | 0,0116 | Shared protein domains | INTERPRO                 |
| PTGS1   | MUC4   | 0,0133 | Shared protein domains | INTERPRO                 |
| PTGS1   | TGFA   | 0,0113 | Shared protein domains | INTERPRO                 |
| CGA     | LHB    | 0,0133 | Shared protein domains | INTERPRO                 |
| IL1B    | FGF7   | 0,0231 | Shared protein domains | INTERPRO                 |
| CGB3    | LHB    | 0,0587 | Shared protein domains | INTERPRO                 |
| CGB3    | CGA    | 0,0131 | Shared protein domains | INTERPRO                 |
| TSHB    | LHB    | 0,0596 | Shared protein domains | INTERPRO                 |
| TSHB    | CGA    | 0,0133 | Shared protein domains | INTERPRO                 |
| TSHB    | CGB3   | 0,0585 | Shared protein domains | INTERPRO                 |
| FSHB    | LHB    | 0,0583 | Shared protein domains | INTERPRO                 |
| FSHB    | CGA    | 0,0130 | Shared protein domains | INTERPRO                 |
| FSHB    | CGB3   | 0,0572 | Shared protein domains | INTERPRO                 |
| FSHB    | TSHB   | 0,0580 | Shared protein domains | INTERPRO                 |
| SQSTM1  | MAP3K3 | 0,0152 | Shared protein domains | INTERPRO                 |
| HSD3B2  | HSD3B1 | 0,0349 | Shared protein domains | INTERPRO                 |
| NKD2    | NUCB1  | 0,0050 | Shared protein domains | INTERPRO                 |
| INHA    | CGA    | 0,0105 | Shared protein domains | INTERPRO                 |
| TSHR    | LHCGR  | 0,0627 | Shared protein domains | INTERPRO                 |
