# Supplementary material for: Transcriptomic Analysis of Porcine Endometrium during Implantation after In Vitro Stimulation by Adiponectin
Source: MDPI journal article supplement (doi:10.3390/ijms20061335), 2019-03-16
Supplement: s1 [file s1]

Supplementary Table 4. The most significantly enriched gene ontologies (biological process)

GO - Biological Process

| GO - Biological Process |                                                                | Up-regulated                                                                   | Count | p-value  | Altered genes                                                                                                                                                                                                                                                                                                                    |
|-------------------------|----------------------------------------------------------------|--------------------------------------------------------------------------------|-------|----------|----------------------------------------------------------------------------------------------------------------------------------------------------------------------------------------------------------------------------------------------------------------------------------------------------------------------------------|
| GO:0010467              | Gene expression                                                |                                                                                | 47    | 4,67E-04 | MTDH, COPSS, CPEB2, TDRD7, UBE3A, ZBTB11, NAA15, SYNCRIP, RPS6KB1, ENPEP, NEO1, ZNF518A, MYBL2, VARS, NXFL1, KDM1B, SF3B1, TFAM, CDC45, CHD2, LEO1, MYCBP, ZNF445, FANCA, HELLS, CHUK, GNL3, BCL9, TAF2, ABCE1, SNAPC5, TAF5, MPHOSPH10, ZNF667, DENR, ATM, PAPOLA, EIF2S1, UCHL5, WDR3, NOP58, NOP56, CUX2, PHEX, ZBTB1, BMPR1A |
| *GO:0006351             | Transcription, DNA-templated                                   |                                                                                | 26    | 1,53E-02 | MTDH, COPSS, UBE3A, NAA15, NEO1, NXFL1, MYBL2, ZNF518A, TFAM, CDC45, LEO1, ZNF445, FANCA, CHUK, HELLS, BCL9, GNL3, TAF2, SNAPC5, TAF5, ZNF667, UCHL5, CUX2, ZBTB1, BMPR1A                                                                                                                                                        |
| GO:0016070              | RNA metabolic process                                          |                                                                                | 39    | 2,18E-03 | MTDH, COPSS, UBE3A, ZBTB11, NAA15, NEO1, ZNF518A, MYBL2, VARS, NXFL1, SF3B1, TFAM, CDC45, CHD2, LEO1, MYCBP, ZNF445, FANCA, HELLS, CHUK, GNL3, BCL9, TAF2, SNAPC5, TAF5, MPHOSPH10, ZNF667, ATM, PAPOLA, UCHL5, WDR3, NOP58, NOP56, CUX2, PHEX, ZBTB1, BMPR1A, KIAA1429                                                          |
| *GO:0032774             | RNA biosynthetic process                                       |                                                                                | 30    | 9,41E-03 | MTDH, COPSS, UBE3A, ZBTB11, NAA15, NEO1, MYBL2, NXFL1, ZNF518A, TFAM, CDC45, CHD2, LEO1, MYCBP, ZNF445, FANCA, CHUK, HELLS, GNL3, BCL9, TAF2, SNAPC5, TAF5, ZNF667, UCHL5                                                                                                                                                        |
|                         | *GO:0097659                                                    | Nucleic acid-templated transcription                                           | 30    | 8,73E-03 | MTDH, COPSS, UBE3A, ZBTB11, NAA15, NEO1, MYBL2, NXFL1, ZNF518A, TFAM, CDC45, CHD2, LEO1, MYCBP, ZNF445, FANCA, CHUK, HELLS, GNL3, BCL9, TAF2, SNAPC5, TAF5, ZNF667, UCHL5                                                                                                                                                        |
| GO:0010468              | Regulation of gene expression                                  |                                                                                | 33    | 1,05E-02 | MTDH, CPEB2, COPSS, UBE3A, TDRD7, ZBTB11, NAA15, SYNCRIP, RPS6KB1, NEO1, MYBL2, KDM1B, TFAM, CDC45, CHD2, LEO1, MYCBP, FANCA, CHUK, HELLS, GNL3, BCL9, TAF2, ZNF667, ATM, PAPOLA, EIF2S1, UCHL5, CUX2, PHEX, ZBTB1, BMPR1A                                                                                                       |
| *GO:0006355             | Regulation of transcription, DNA-templated                     |                                                                                | 24    | 8,44E-02 | TAF2, MTDH, COPSS, UBE3A, ZBTB11, ZNF667, NAA15, NEO1, MYBL2, TFAM, CDC45, UCHL5, CHD2, LEO1, MYCBP, PHEX, FANCA, ZBTB1, HELLS, CHUK, BMPR1A, GNL3, BCL9                                                                                                                                                                         |
|                         | GO:1902895                                                     | Positive regulation of pri-miRNA transcription from RNA polymerase II promoter | 2     | 9,85E-02 | BMPR1A, GNL3                                                                                                                                                                                                                                                                                                                     |
| GO:0051171              | Regulation of nitrogen compound metabolic process              |                                                                                | 33    | 1,18E-02 | MTDH, CPEB2, COPSS, UBE3A, ZBTB11, NAA15, SYNCRIP, RPS6KB1, NEO1, MYBL2, KDM1B, TFAM, CDC45, CHD2, LEO1, MYCBP, ACSL3, FANCA, CHUK, HELLS, GNL3, BCL9, TAF2, ZNF667, SAMD8, PAPOLA, EIF2S1, PARBP, UCHL5, PHEX, ZBTB1, BMPR1A                                                                                                    |
| *GO:0019219             | Regulation of nucleobase-containing compound metabolic process |                                                                                | 27    | 9,97E-02 | MTDH, COPSS, UBE3A, ZBTB11, NAA15, NEO1, MYBL2, KDM1B, TFAM, CDC45, CHD2, LEO1, MYCBP, FANCA, HELLS, CHUK, BCL9, GNL3, TAF2, ZNF667, PAPOLA, PARBP, UCHL5, PHEX, ZBTB1, BMPR1A                                                                                                                                                   |
|                         | *GO:0051252                                                    | Regulation of RNA metabolic process                                            | 25    | 8,59E-02 | TAF2, MTDH, COPSS, UBE3A, ZBTB11, ZNF667, NAA15, NEO1, MYBL2, TFAM, CDC45, PAPOLA, UCHL5, CHD2, LEO1, MYCBP, PHEX, FANCA, ZBTB1, HELLS, CHUK, BMPR1A, GNL3, BCL9                                                                                                                                                                 |
|                         | *GO:2001141                                                    | Regulation of RNA biosynthetic process                                         | 24    | 8,84E-02 | TAF2, MTDH, COPSS, UBE3A, ZBTB11, ZNF667, NAA15, NEO1, MYBL2, TFAM, CDC45, UCHL5, CHD2, LEO1, MYCBP, PHEX, FANCA, ZBTB1, HELLS, CHUK, BMPR1A, GNL3, BCL9                                                                                                                                                                         |
|                         | *GO:1903506                                                    | Regulation of nucleic acid-templated transcription                             | 24    | 8,62E-02 | TAF2, MTDH, COPSS, UBE3A, ZBTB11, ZNF667, NAA15, NEO1, MYBL2, TFAM, CDC45, UCHL5, CHD2, LEO1, MYCBP, PHEX, FANCA, ZBTB1, HELLS, CHUK, BMPR1A, GNL3, BCL9                                                                                                                                                                         |
| GO:0010556              | Regulation of macromolecule biosynthetic process               |                                                                                | 31    | 1,23E-02 | MTDH, SEC24A, ENPP1, CPEB2, COPSS, UBE3A, ZBTB11, NAA15, SYNCRIP, RPS6KB1, NEO1, MYBL2, TFAM, CDC45, CHD2, LEO1, MYCBP, FANCA, CHUK, HELLS, GNL3, BCL9, TAF2, ZNF667, SAMD8, EIF2S1, UCHL5, PHEX, ZBTB1, BMPR1A                                                                                                                  |
| *GO:2000112             | Regulation of cellular macromolecule biosynthetic process      |                                                                                | 29    | 2,69E-02 | MTDH, CPEB2, COPSS, ENPP1, UBE3A, ZBTB11, NAA15, SYNCRIP, RPS6KB1, NEO1, MYBL2, TFAM, CDC45, CHD2, LEO1, MYCBP, FANCA, CHUK, HELLS, GNL3, BCL9, TAF2, ZNF667, EIF2S1, UCHL5, PHEX, ZBTB1, BMPR1A                                                                                                                                 |
| GO:0044248              | Cellular catabolic process                                     |                                                                                | 15    | 6,80E-02 | NUDT12, ENPP1, UBE3A, SOCS4, UBR1, ENPEP, CLPX, ATM, DDHD2, CUL5, UCHL5, CROT, ETEA, HECTD1                                                                                                                                                                                                                                      |
| GO:0016192              | Vesicle-mediated transport                                     |                                                                                | 14    | 2,05E-02 | STX1A, SEC24A, COPSS, AP4E1, UBE3A, EEA1, HOOK1, DDHD2, SGSM1, ANKRD50, ATP9A, VPS26A, ABL2, GOLGA4                                                                                                                                                                                                                              |
| GO:0006259              | DNA metabolic process                                          |                                                                                | 12    | 2,25E-02 | KDM1B, CDC45, DCLRE1A, PARBP, NCMBP, UCHL5, HSPD1, ZBTB1, HELLS, ATM, GNL3                                                                                                                                                                                                                                                       |
| *GO:0006281             | DNA repair                                                     |                                                                                | 7     | 8,22E-02 | CDC45, DCLRE1A, PARBP, UCHL5, ZBTB1, ATM                                                                                                                                                                                                                                                                                         |
| *GO:0006310             | DNA recombination                                              |                                                                                | 5     | 6,27E-02 | CDC45, PARBP, UCHL5, HSPD1                                                                                                                                                                                                                                                                                                       |
| GO:0070647              | Protein modification by small protein conjugation or removal   |                                                                                | 10    | 5,23E-02 | ULC5, COPSS, UBE3A, RUSC1, UCHL5, LEO1, SOCS4, GNL3, HECTD1                                                                                                                                                                                                                                                                      |
| GO:0009628              | Response to abiotic stimulus                                   |                                                                                | 9     | 8,85E-02 | RDH11, DDHD2, CPEB2, EIF2S1, TRPV2, RYR1, HSPD1, ZBTB1, ATM                                                                                                                                                                                                                                                                      |
| *GO:0071482             | Cellular response to light stimulus                            |                                                                                | 3     | 8,13E-02 | RDH11, EIF2S1, ZBTB1                                                                                                                                                                                                                                                                                                             |
| GO:0022613              | Ribonucleoprotein complex biogenesis                           |                                                                                | 8     | 3,70E-02 | SF3B1, ABCE1, MPHOSPH10, NOP58, WDR3, DENR, NOP56, GNL3                                                                                                                                                                                                                                                                          |
| *GO:0042254             | Ribosome biogenesis                                            |                                                                                | 6     | 5,38E-02 | ABCE1, MPHOSPH10, NOP58, WDR3, NOP56, GNL3                                                                                                                                                                                                                                                                                       |
| GO:0009116              | Nucleoside metabolic process                                   |                                                                                | 6     | 7,35E-02 | ENPP1, DLD, OLA1, ATP50, ATP8, CROT                                                                                                                                                                                                                                                                                              |
|                         | GO:0042278                                                     | Purine nucleoside metabolic process                                            | 6     | 4,74E-02 | ENPP1, DLD, OLA1, ATP50, ATP8, CROT                                                                                                                                                                                                                                                                                              |
|                         | GO:0046128                                                     | Purine ribonucleoside metabolic process                                        | 6     | 4,52E-02 | ENPP1, DLD, OLA1, ATP50, ATP8, CROT                                                                                                                                                                                                                                                                                              |
| GO:1901657              | Glycosyl compound metabolic process                            |                                                                                | 6     | 9,16E-02 | ENPP                                                                                                                                                                                                                                                                                                                             |

| Down-regulated |                                                           |  | Count | p-value  | Altered genes                                                                                                                                                                                                                                                                                                                                                                                                                                                                                                                                                                                                                            |
|----------------|-----------------------------------------------------------|--|-------|----------|------------------------------------------------------------------------------------------------------------------------------------------------------------------------------------------------------------------------------------------------------------------------------------------------------------------------------------------------------------------------------------------------------------------------------------------------------------------------------------------------------------------------------------------------------------------------------------------------------------------------------------------|
| GO:0010468     | Regulation of gene expression                             |  | 85    | 2,63E-04 | MORF4L1, ABCF1, CPEB4, STAT5A, LOC100158121, CCNT1, FOXO3, NR2E3, LOC100627422, DDR2, CITED2, APP, MDFIC, WWP1, MSN, NOS2, RARB, EIF2B2, KDM5B, LOC100153329, SAMD4A, TBL1XR1, CCNK, ACTA1, LDB1, ARID5B, SAA3, TLE4, PPP1CC, TBR1, EIF4G1, INHBA, HHEX, EP300, FANCD2, MED17, TFAP2A, TNFAIP3, SBN01, SAV1, NFKBIA, KEAP1, NR3C1, CCL4, DTNBP1, NR2C2, UHMK1, ZFP36L1, TNFRSF1B, HNRNP, DDX46, MAP3K2, AGO1, KDM3A, PHF20L1, INPP5B, CHD3, TRAF3, CEBPA, ZNF398, IKZF4, DNMT3A, BRD2, KAT2B, CEBPB, SMAD7, KLF11, LOC100154071, FXR2, RBMX, FOXP1, RGS14, SIRT2, SOD2, SFRP5, ATF6, RNF8, ATXN1, RPS6KA3, ETS1, HBZ, IRF1, GRB7, RNF111 |
| *GO:0010628    | Positive regulation of gene expression                    |  | 41    | 1,14E-03 | ABCF1, STAT5A, CCNT1, NFKBIA, NR2E3, NR3C1, DTNBP1, UHMK1, NR2C2, APP, MAP3K2, MDFIC, AGO1, KDM3A, RARB, MSN, KDM5B, SAMD4A, CEBPA, IKZF4, TBL1XR1, CCNK, KAT2B, CEBPB, ACTA1, LDB1, TBR1, RBMX, FOXP1, SIRT2, ATF6, HHEX, INHBA, RPS6KA3, EP300, ETS1, MED17, IRF1, TFAP2A, RNF111                                                                                                                                                                                                                                                                                                                                                      |
| *GO:0010629    | Negative regulation of gene expression                    |  | 36    | 1,77E-03 | MORF4L1, CPEB4, LOC100158121, CCNT1, NR2E3, CCL4, LOC100627422, ZFP36L1, MDFIC, WWP1, AGO1, RARB, NOS2, KDM5B, LOC100153329, SAMD4A, CEBPA, DNMT3A, TBL1XR1, IKZF4, SMAD7, LDB1, KLF11, LOC100154071, SAA3, TLE4, FXR2, FOXF1, SIRT2, ATXN1, RNF8, EP300, HBZ, IRF1, TFAP2A, GRB7                                                                                                                                                                                                                                                                                                                                                        |
| *GO:0016458    | Gene silencing                                            |  | 6     | 9,91E-02 | MORF4L1, DNMT3A, LOC100158121, AGO1, LOC100154071, LOC100153329                                                                                                                                                                                                                                                                                                                                                                                                                                                                                                                                                                          |
| GO:0009892     | Negative regulation of metabolic process                  |  | 56    | 5,83E-04 | MORF4L1, CPEB4, CCNT1, LOC100158121, NR2E3, LOC100627422, APP, MDFIC, WWP1, NOS2, RARB, TNIP1, KDM5B, LOC100153329, SAMD4A, TBL1XR1, LDB1, SOCS1, ELANE, FBP1, SAA3, TLE4, HHEX, RENBP, EP300, HIPK3, SERPINB1, TFAP2A, TNFAIP3, AZIN1, DTNBP1, CCL4, ZFP36L1, LPCAT1, AGO1, KDM3A, TRIP12, CEBPA, DNMT3A, IKZF4, KAT2B, PCIF1, SMAD7, CBL, KLF11, LOC100154071, FXR2, SIRT2, RGS14, FOXF1, RNF8, ATXN1, CBLB, HBZ, IRF1, GRB7                                                                                                                                                                                                           |
| *GO:0031324    | Negative regulation of cellular metabolic process         |  | 53    | 8,51E-04 | MORF4L1, CPEB4, CCNT1, LOC100158121, NR2E3, LOC100627422, APP, MDFIC, WWP1, RARB, TNIP1, KDM5B, LOC100153329, SAMD4A, TBL1XR1, LDB1, SOCS1, ELANE, SAA3, FBP1, TLE4, HHEX, RENBP, EP300, HIPK3, SERPINB1, TFAP2A, TNFAIP3, DTNBP1, CCL4, ZFP36L1, AGO1, KDM3A, TRIP12, CEBPA, DNMT3A, IKZF4, KAT2B, PCIF1, SMAD7, CBL, KLF11, LOC100154071, FXR2, SIRT2, RGS14, FOXF1, RNF8, ATXN1, CBLB, HBZ, IRF1, GRB7                                                                                                                                                                                                                                |
| *GO:0032269    | Negative regulation of cellular protein metabolic process |  | 23    | 3,08E-02 | KAT2B, SMAD7, CPEB4, SOCS1, CBL, FXR2, DTNBP1, RGS14, SIRT2, ZFP36L1, HHEX, CBLB, RENBP, APP, HIPK3, AGO1, SERPINB1, KDM3A, TNFAIP3, TNIP1, GDB2, SAMD4A, TRIP12                                                                                                                                                                                                                                                                                                                                                                                                                                                                         |
| GO:0002682     | Regulation of immune system process                       |  | 41    | 4,64E-06 | PHLPP1, AMCF-II, CSF3, MASP1, STAT5A, CXCL2, CD247, CXCL8, NFKBIA, FOXO3, CCL4, CCL28, AQP3, APOA1, IL4R, SERPINB10, MSN, TNIP1, LOC100621389, TRAF3, SELP, SIT1, LY96, KLF13, LDB1, ELANE, SOCS1, CHST3, FXR2, FOXF1, INHBA, RPS6KA3, TNFSF13B, ETS1, FANCD2, IRF1, JAK3, CD79A, TNFAIP3, JAM3                                                                                                                                                                                                                                                                                                                                          |
| *GO:0002684    | Positive regulation of immune system process              |  | 27    | 2,00E-04 | CSF3, AMCF-II, MASP1, STAT5A, CD247, CXCL2, CXCL8, NFKBIA, FOXO3, CCL4, AQP3, IL4R, TNIP1, TRAF3, SELP, LY96, ELANE, FOXF1, INHBA, RPS6KA3, TNFSF13B, ETS1, IRF1, JAK3, CD79A, TNFAIP3                                                                                                                                                                                                                                                                                                                                                                                                                                                   |
| *GO:0050776    | Regulation of immune response                             |  | 15    | 7,08E-02 | MAASP1, LY96, ELANE, CD247, SOCS1, NFKBIA, RPS6KA3, APOA1, TNFSF13B, IL4R, IRF1, CD79A, TNFAIP3, TNIP1, TRAF3                                                                                                                                                                                                                                                                                                                                                                                                                                                                                                                            |
| *GO:0050778    | Positive regulation of immune response                    |  | 13    | 4,98E-02 | RPS6KA3, TNFSF13B, MASP1, LY96, IL4R, ELANE, CD247, IRF1, NFKBIA, CD79A, TNFAIP3, TNIP1, TRAF3                                                                                                                                                                                                                                                                                                                                                                                                                                                                                                                                           |
| *GO:0002253    | Activation of immune response                             |  | 10    | 4,41E-02 | RPS6KA3, MASP1, LY96, CD247, IRF1, NFKBIA, CD79A, TNFAIP3, TNIP1, TRAF3                                                                                                                                                                                                                                                                                                                                                                                                                                                                                                                                                                  |
| *GO:1903706    | Regulation of hemopoiesis                                 |  | 13    | 5,45E-03 | CSF3, INHBA, ETS1, KLF13, FANCD2, IL4R, LDB1, STAT5A, IRF1, NFKBIA, FOXO3, LOC100621389                                                                                                                                                                                                                                                                                                                                                                                                                                                                                                                                                  |
| *GO:0045637    | Regulation of myeloid cell differentiation                |  | 10    | 3,42E-03 | CSF3, INHBA, ETS1, KLF13, LDB1, STAT5A, NFKBIA, FOXO3, LOC100621389                                                                                                                                                                                                                                                                                                                                                                                                                                                                                                                                                                      |
| *GO:0045646    | Regulation of erythrocyte differentiation                 |  | 6     | 6,98E-04 | INHBA, ETS1, KLF13, LDB1, STAT5A, FOXO3                                                                                                                                                                                                                                                                                                                                                                                                                                                                                                                                                                                                  |
| *GO:0045647    | Regulation of erythrocyte differentiation                 |  | 3     | 1,52E-02 | KLF13, LDB1, STAT5A                                                                                                                                                                                                                                                                                                                                                                                                                                                                                                                                                                                                                      |
| *GO:0045639    | Positive regulation of myeloid cell differentiation       |  | 5     | 5,84E-02 | CSF3, INHBA, ETS1, FOXO3                                                                                                                                                                                                                                                                                                                                                                                                                                                                                                                                                                                                                 |
| *GO:0045638    | Negative regulation of myeloid cell differentiation       |  | 5     | 3,00E-02 | KLF13, LDB1, STAT5A, NFKBIA, LOC100621389                                                                                                                                                                                                                                                                                                                                                                                                                                                                                                                                                                                                |
| *GO:1903708    | Positive regulation of hemopoiesis                        |  | 7     | 5,62E-02 | CSF3, INHBA, ETS1, IL4R, STAT5A, FOXO3                                                                                                                                                                                                                                                                                                                                                                                                                                                                                                                                                                                                   |
| *GO:1903707    | Negative regulation of hemopoiesis                        |  | 7     | 1,30E-02 | KLF13, IL4R, LDB1, STAT5A, IRF1, NFKBIA, LOC100621389                                                                                                                                                                                                                                                                                                                                                                                                                                                                                                                                                                                    |
| *GO:0045088    | Regulation of innate immune response                      |  | 8     | 5,71E-02 | RPS6KA3, LY96, SOCS1, IRF1, NFKBIA, TNFAIP3, TNIP1, TRAF3                                                                                                                                                                                                                                                                                                                                                                                                                                                                                                                                                                                |
| *GO:0045089    | Positive regulation of innate immune response             |  | 7     | 5,39E-02 | RPS6KA3, LY96, IRF1, NFKBIA, TNFAIP3, TNIP1, TRAF3                                                                                                                                                                                                                                                                                                                                                                                                                                                                                                                                                                                       |
| *GO:0002685    | Regulation of leukocyte migration                         |  | 8     | 2,28E-02 | AMCF-II, SELP, CXCL2, CXCL8, MSN, JAM3, CCL28, CCL4                                                                                                                                                                                                                                                                                                                                                                                                                                                                                                                                                                                      |
| *GO:0050901    | Leukocyte tethering or rolling                            |  | 3     | 5,77E-02 | SELP, ITGB7, CCL28                                                                                                                                                                                                                                                                                                                                                                                                                                                                                                                                                                                                                       |
| *GO:1902622    | Regulation of neutrophil migration                        |  | 3     | 9,02E-02 | CXCL2, CXCL8, JAM3                                                                                                                                                                                                                                                                                                                                                                                                                                                                                                                                                                                                                       |
| *GO:0090022    | Regulation of neutrophil chemotaxis                       |  | 3     | 7,34E-02 | CXCL2, CXCL8, JAM3                                                                                                                                                                                                                                                                                                                                                                                                                                                                                                                                                                                                                       |
| GO:0042127     | Regulation of cell proliferation                          |  | 38    | 2,44E-03 | AMCF-II, CSF3, STAT5A, SAV1, CXCL2, PTGS1, CXCL8, NFKBIA, FOXO3, CCL4, AQP3, IL4R, TNIP1, P14ARF, TNFRSF11B, TNFRSF1B, RARB, NOS2, KDM5B, CEBPA, KAT2B, KLF13, ELANE, KLF11, LOC100154071, PTPRU, FOXF1, SIRT2, SOD2, SFRP5, HHEX, INHBA, PPP1R9B, TNFSF13B, IRF1, TFAP2A, JAK3, TNFAIP3                                                                                                                                                                                                                                                                                                                                                 |
| *GO:0008285    | Negative regulation of cell proliferation                 |  | 17    | 2,19E-02 | CEBPA, KAT2B, KLF13, SAV1, KLF11, LOC100154071, NR2E3, PTPRU, P14ARF, SIRT2, SOD2, SFRP5, INHBA, IRF1, TFAP2A, RARB                                                                                                                                                                                                                                                                                                                                                                                                                                                                                                                      |
| GO:0008283     | Cell proliferation                                        |  | 36    | 4,26E-02 | MORF4L1, CSF3, STAT5A, SAV1, FOXO3, NR2E3, DDR2, P14ARF, ZFP36L1, APOA1, SDR16C5, RARB, KDM5B, CEBPA, PDK1, KAT2B, KLF13, ELANE, KLF11, LOC100154071, PTPRU, FOXF1, SIRT2, SOD2, TACC2, SFRP5, HHEX, INHBA, TNFSF13B, IRF1, TFAP2A, TXNRD1, JAK3, CD79A, TNFAIP3                                                                                                                                                                                                                                                                                                                                                                         |
| GO:0012501     | Programmed cell death                                     |  | 35    | 6,62E-02 | PHLPP1, NUAKE2, SAV1, STAT5A, FOXO3, GCLM, TNFRSF4, P14ARF, CITED2, ZFP36L1, PEA15, APP, TNFRSF1B, TNFRSF11B, RARB, CASP1, TRAF3, PDK1, CLN3, ANP32B, AIFM2, CBL, KLF11, CHIS1, SIRT2, PROC, SOD2, INHBA, EP300, PYGL, HIPK3, IRF1, TFAP2A, TNFAIP3, ARHGAP10                                                                                                                                                                                                                                                                                                                                                                            |
| GO:0022610     | Biological adhesion                                       |  | 29    | 9,07E-02 | ITGAL, TLN1, ASS1, STAT5A, CCL28, WHAMM, CITED2, ZFP36L1, APP, APOA1, IL4R, ITGB7, MSN, TNIP1, MYOC, SELP, SIT1, ATP4B, SMAD7, LDB1, PTPRU, FOXF1, LYVE1, TNFSF13B, ETS1, FANCD2, IRF1, JAK3, JAM3                                                                                                                                                                                                                                                                                                                                                                                                                                       |
| *GO:0007155    | Cell adhesion                                             |  | 29    | 8,77E-02 | ITGAL, TLN1, ASS1, STAT5A, CCL28, WHAMM, CITED2, ZFP36L1, APP, APOA1, IL4R, ITGB7, MSN, TNIP1, MYOC, SELP, SIT1, ATP4B, SMAD7, LDB1, PTPRU, FOXF1, LYVE1, TNFSF13B, ETS1, FANCD2, IRF1, JAK3, JAM3                                                                                                                                                                                                                                                                                                                                                                                                                                       |

|              |                                                                  |    |          |                                                                                                                                                                                                    |
|--------------|------------------------------------------------------------------|----|----------|----------------------------------------------------------------------------------------------------------------------------------------------------------------------------------------------------|
| *GO:0098602  | Single organism cell adhesion                                    | 24 | 5,81E-03 | ITGAL, SELP, TLN1, SIT1, ASS1, SMAD7, STAT5A, PTPRU, CCL28, FOXP1, CITED2, ZFP36L1, APOA1, TNFSF13B, ETS1, FANCD2, IL4R, ITGB7, IRF1, MSN, JAK3, TNIP1, JAM3, MYOC                                 |
|              | *GO:0016337 Single organismal cell-cell adhesion                 | 23 | 4,83E-03 | ITGAL, SELP, TLN1, SIT1, ASS1, SMAD7, STAT5A, PTPRU, CCL28, FOXP1, CITED2, ZFP36L1, APOA1, TNFSF13B, ETS1, FANCD2, IL4R, ITGB7, IRF1, MSN, JAK3, TNIP1, JAM3                                       |
| *GO:0098609  | Cell-cell adhesion                                               | 23 | 3,38E-02 | ITGAL, SELP, TLN1, SIT1, ASS1, SMAD7, STAT5A, PTPRU, CCL28, FOXP1, CITED2, ZFP36L1, APOA1, TNFSF13B, ETS1, FANCD2, IL4R, ITGB7, IRF1, MSN, JAK3, TNIP1, JAM3                                       |
|              | *GO:0007159 Leukocyte cell-cell adhesion                         | 17 | 1,24E-02 | ITGAL, SELP, SIT1, ASS1, STAT5A, CCL28, FOXP1, ZFP36L1, TNFSF13B, ETS1, FANCD2, IL4R, ITGB7, IRF1, MSN, JAK3, TNIP1                                                                                |
|              | *GO:0061756 Leukocyte adhesion to vascular endothelial cell      | 4  | 9,48E-03 | SELP, ETS1, ITGB7, CCL28                                                                                                                                                                           |
|              | *GO:0007160 Cell-matrix adhesion                                 | 7  | 7,09E-02 | ITGAL, ITGB7, LDB1, JAM3, CCL28, WHAMM, MYOC                                                                                                                                                       |
| GO:0002520   | Immune system development                                        | 28 | 2,26E-03 | PHLPP1, CSF3, STAT5A, NFKBIA, FOXO3, CITED2, ZFP36L1, IL4R, LOC100621389, CEBPA, CEBPE, KLF13, LDB1, FOXP1, SOD2, INHBA, HHEX, EP300, ETS1, FANCD2, HBZ, IRF1, CD79A, JAK3, PIP4K2A, TNFAIP3, JAM3 |
| *GO:0048534  | Hematopoietic or lymphoid organ development                      | 26 | 4,61E-03 | CSF3, STAT5A, NFKBIA, FOXO3, CITED2, ZFP36L1, IL4R, LOC100621389, CEBPA, CEBPE, KLF13, LDB1, FOXP1, SOD2, INHBA, HHEX, EP300, ETS1, FANCD2, HBZ, IRF1, CD79A, JAK3, PIP4K2A, JAM3                  |
|              | *GO:0030097 Hemopoiesis                                          | 26 | 1,99E-03 | CSF3, STAT5A, NFKBIA, FOXO3, CITED2, ZFP36L1, IL4R, LOC100621389, CEBPA, CEBPE, KLF13, LDB1, FOXP1, SOD2, INHBA, HHEX, EP300, ETS1, FANCD2, HBZ, IRF1, CD79A, JAK3, PIP4K2A, JAM3                  |
|              | *GO:0030099 Myeloid cell differentiation                         | 17 | 1,35E-04 | CSF3, CEBPA, CEBPE, KLF13, STAT5A, LDB1, NFKBIA, FOXO3, CITED2, INHBA, HHEX, EP300, ETS1, HBZ, PIP4K2A, LOC100621389                                                                               |
|              | *GO:0030218 Erythrocyte differentiation                          | 8  | 1,73E-03 | INHBA, ETS1, KLF13, LDB1, STAT5A, HBZ, FOXO3, CITED2                                                                                                                                               |
|              | *GO:0061515 Myeloid cell development                             | 4  | 5,15E-02 | EP300, HBZ, PIP4K2A, CITED2                                                                                                                                                                        |
| GO:0032504   | Multicellular organism reproduction                              | 18 | 1,83E-02 | RAD23B, DNMT3A, STAT5A, ABHD2, FOXO3, SIRT2, NR2C2, CITED2, INHBA, APP, FANCD2, KDM3A, EIF2B2, PABPC1L, INPP5B, JAM3, LHB, TBC1D20                                                                 |
| *GO:0048609  | Multicellular organismal reproductive process                    | 18 | 1,57E-02 | RAD23B, DNMT3A, STAT5A, ABHD2, FOXO3, SIRT2, NR2C2, CITED2, INHBA, APP, FANCD2, KDM3A, EIF2B2, PABPC1L, INPP5B, JAM3, LHB, TBC1D20                                                                 |
|              | *GO:0019953 Sexual reproduction                                  | 17 | 5,73E-02 | RAD23B, DNMT3A, STX2, ABHD2, FOXO3, SIRT2, NR2C2, INHBA, APP, FANCD2, KDM3A, PABPC1L, INPP5B, JAM3, KDM5B, LHB, TBC1D20                                                                            |
|              | *GO:0007276 Gamete generation                                    | 14 | 6,32E-02 | RAD23B, DNMT3A, ABHD2, FOXO3, SIRT2, NR2C2, INHBA, FANCD2, KDM3A, PABPC1L, INPP5B, JAM3, LHB, TBC1D20                                                                                              |
|              | *GO:0030728 Ovulation                                            | 3  | 2,50E-02 | INHBA, FOXO3, LHB                                                                                                                                                                                  |
|              | *GO:0022602 Ovulation cycle process                              | 4  | 9,68E-02 | INHBA, STAT5A, FOXO3, EIF2B2                                                                                                                                                                       |
| GO:0003006   | Developmental process involved in reproduction                   | 17 | 9,05E-02 | CEBPA, CGA, ARID5B, STAT5A, ABHD2, FOXO3, SIRT2, CITED2, ZFP36L1, INHBA, PRLR, KDM3A, EIF2B2, PABPC1L, JAM3, KDM5B, TBC1D20                                                                        |
| *GO:0045137  | Development of primary sexual characteristics                    | 8  | 2,51E-02 | CGA, INHBA, STAT5A, ARID5B, FOXO3, EIF2B2, TBC1D20, CITED2                                                                                                                                         |
|              | *GO:0046545 Development of primary female sexual characteristics | 8  | 2,28E-02 | CGA, INHBA, STAT5A, ARID5B, FOXO3, EIF2B2, TBC1D20, CITED2                                                                                                                                         |
| *GO:0046660  | Female sex differentiation                                       | 5  | 8,05E-02 | INHBA, STAT5A, ARID5B, FOXO3, EIF2B2                                                                                                                                                               |
| GO:0001816   | Cytokine production                                              | 16 | 4,42E-02 | AMCF-II, CEBPE, LY96, STAT5A, ELANE, SOCS1, IL9, CHI3L1, FOXP1, APOA1, IL4R, IRF1, NOS2, CASP1, TNFAIP3, TRAF3                                                                                     |
| **GO:0042107 | Cytokine metabolic process                                       | 5  | 6,54E-02 | CEBPE, STAT5A, ELANE, IL9, IRF1                                                                                                                                                                    |
|              | *GO:0042089 Cytokine biosynthetic process                        | 5  | 8,18E-02 | CEBPE, STAT5A, ELANE, IL9, IRF1                                                                                                                                                                    |
| GO:0030155   | Regulation of cell adhesion                                      | 16 | 5,26E-02 | SIT1, ASS1, SMAD7, LDB1, STAT5A, CCL28, CITED2, APOA1, PRLR, TNFSF13B, ETS1, FANCD2, IL4R, IRF1, JAK3, MYOC                                                                                        |
| **GO:0045785 | Positive regulation of cell adhesion                             | 11 | 5,56E-02 | APOA1, TNFSF13B, ETS1, SMAD7, IL4R, LDB1, STAT5A, JAK3, CCL28, MYOC, CITED2                                                                                                                        |
| *GO:0022407  | Regulation of cell-cell adhesion                                 | 13 | 1,25E-02 | SIT1, ASS1, SMAD7, STAT5A, CCL28, CITED2, APOA1, TNFSF13B, ETS1, FANCD2, IL4R, IRF1, JAK3                                                                                                          |
|              | *GO:1903037 Regulation of leukocyte cell-cell adhesion           | 10 | 4,00E-02 | SIT1, TNFSF13B, ASS1, ETS1, FANCD2, IL4R, STAT5A, IRF1, JAK3, CCL28                                                                                                                                |
| GO:0061458   | Reproductive system development                                  | 12 | 8,88E-02 | ZFP36L1, CEBPA, CGA, INHBA, PRLR, STAT5A, ARID5B, FOXO3, EIF2B2, KDM5B, TBC1D20, CITED2                                                                                                            |
| *GO:0048608  | Reproductive structure development                               | 12 | 8,48E-02 | ZFP36L1, CEBPA, CGA, INHBA, PRLR, STAT5A, ARID5B, FOXO3, EIF2B2, KDM5B, TBC1D20, CITED2                                                                                                            |
|              | *GO:0008406 Gonad development                                    | 8  | 2,28E-02 | CGA, INHBA, STAT5A, ARID5B, FOXO3, EIF2B2, TBC1D20, CITED2                                                                                                                                         |
|              | *GO:0008585 Female gonad development                             | 5  | 5,19E-02 | INHBA, STAT5A, ARID5B, FOXO3, EIF2B2                                                                                                                                                               |
| GO:0045786   | Negative regulation of cell cycle                                | 12 | 6,45E-02 | CEBPA, TMEM67, INHBA, HHEX, CCNK, CDKN1A, KAT2B, IRF1, TNFAIP3, CDKN3, P14ARF, UHMK1                                                                                                               |
| GO:1900046   | Regulation of hemostasis                                         | 5  | 4,88E-02 | SELP, STX2, KLKB1, ENPP4, PROC                                                                                                                                                                     |
| GO:0042108   | Positive regulation of cytokine biosynthetic process             | 4  | 7,00E-02 | STAT5A, ELANE, IL9, IRF1                                                                                                                                                                           |

\*Subset

\*\*Part of
